# Supplementary material for: Evolution of Phosphoregulation: Comparison of Phosphorylation Patterns across Yeast Species
Source: PLoS Biol. 2009 Jun 23;7(6):e1000134. doi: 10.1371/journal.pbio.1000134 (PMC2691599; doi:10.1371/journal.pbio.1000134)
Supplement: Dataset S1 — Experimentally determined phosphorylation sites for S. cerevisiae , C. albicans , and Sc. pombe . (2.63 MB XLS) [file pbio.1000134.s001.xls]

## Sheet: statistics
Candida albicans						Saccharomyces cerevisiae						Schizosaccharomyces pombe
Expectation	Occurences	Cumulative	Cumulative	Bin		Expectation	Occurences	Cumulative	Cumulative	Bin		Expectation	Occurences	Cumulative	Cumulative	Bin
Bin		Occurences	error	error		Bin		Occurences	error	error		Bin		Occurences	error	error
1e-10	8	8	0	0		1e-10	11	11	0	0		1e-10	13	13	0	0
2e-10	4	12	0	0		2e-10	37	48	0	0		2e-10	8	21	0	0
4e-10	10	22	0	0		4e-10	5	53	0	0		4e-10	9	30	0	0
8e-10	14	36	0	0		8e-10	10	63	0	0		8e-10	11	41	0	0
1.6e-09	14	50	0	0		1.6e-09	13	76	0	0		1.6e-09	7	48	0	0
3.2e-09	30	80	0	0		3.2e-09	16	92	0	0		3.2e-09	24	72	0	0
6.4e-09	41	121	0	0		6.4e-09	17	109	0	0		6.4e-09	24	96	0	0
1.28e-08	59	180	0	0		1.28e-08	38	147	0	0		1.28e-08	34	130	0	0
2.56e-08	54	234	0	0		2.56e-08	42	189	0	0		2.56e-08	47	177	0	0
5.12e-08	86	320	0	0		5.12e-08	49	238	0	0		5.12e-08	51	228	0	0
1.024e-07	99	419	0	0		1.024e-07	58	296	0	0		1.024e-07	67	295	0	0
2.048e-07	119	538	0	0		2.048e-07	62	358	0	0		2.048e-07	68	363	0	0
4.096e-07	154	692	0	0		4.096e-07	77	435	0	0		4.096e-07	84	447	0	0
8.192e-07	168	860	0	0		8.192e-07	169	604	0	0		8.192e-07	98	545	0	0
1.6384e-06	202	1062	0	0		1.6384e-06	169	773	0	0		1.6384e-06	111	656	0	0
3.2768e-06	210	1272	0	0		3.2768e-06	138	911	0	0		3.2768e-06	121	777	0	0
6.5536e-06	288	1560	0	0		6.5536e-06	148	1059	0	0		6.5536e-06	137	914	0	0
1.31072e-05	328	1888	0	0		1.31072e-05	178	1237	0	0		1.31072e-05	127	1041	0.000960615	0.00787402
2.62144e-05	328	2216	0	0		2.62144e-05	231	1468	0	0		2.62144e-05	126	1167	0.000856898	0
5.24288e-05	319	2535	0.000394477	0.0031348		5.24288e-05	172	1640	0	0		5.24288e-05	127	1294	0.000772798	0
0.000104858	308	2843	0.00105522	0.00649351		0.000104858	199	1839	0	0		0.000104858	124	1418	0.00141044	0.00806452
0.000209715	321	3164	0.00126422	0.00311526		0.000209715	192	2031	0.000984737	0.0104167		0.000209715	102	1520	0.00197368	0.00980392
0.00041943	323	3487	0.00172068	0.00619195		0.00041943	194	2225	0.000898876	0		0.00041943	112	1632	0.00245098	0.00892857
0.000838861	302	3789	0.0023753	0.00993377		0.000838861	200	2425	0.00206186	0.015		0.000838861	97	1729	0.00404858	0.0309278
0.00167772	317	4106	0.00340964	0.0157729		0.00167772	254	2679	0.00447928	0.0275591		0.00167772	106	1835	0.00490463	0.0188679
0.00335544	311	4417	0.00452796	0.0192926		0.00335544	198	2877	0.00625652	0.030303		0.00335544	97	1932	0.00672878	0.0412371
0.00671089	298	4715	0.00805938	0.0604027		0.00671089	253	3130	0.0102236	0.055336		0.00671089	91	2023	0.00939199	0.0659341
0.0134218	270	4985	0.0118355	0.0777778		0.0134218	182	3312	0.0126812	0.0549451		0.0134218	91	2114	0.0146641	0.131868
0.0268435	267	5252	0.0137091	0.0486891		0.0268435	147	3459	0.0135877	0.0340136		0.0268435	66	2180	0.016055	0.0606061
0.0536871	282	5534	0.0140947	0.0212766		0.0536871	157	3616	0.0135509	0.0127389		0.0536871	60	2240	0.0174107	0.0666667

## Sheet: C.albicans
## Experimentally determined phosphorylation sites for C. albicans
## The corresponding mass spectra can be found on our website at http://interactome-cmp.ucsf.edu/evolution_phosphoregulation.html
## Acc: Uniprot accession ; Gene: Uniprot entry name; m - mass; z-charge;
## Peptide (Prospector annotation) - most likely peptide annotation as provided by Prospector. Phosphorylated residues are indicated my lower case (s/t/y).
## Phosphosite confidence score - The Inspect package was used to calculate the BY ion intensity difference between the best and second best phosphosite placement for phosphopeptides with one phosphosite. Higher values correspond to higher confidence in phosphosite assignment.
## Phosphosite confidence score - A cut-off of 0.02 was selected based on a list of manually curated phosphopeptides and results in approximately 85% accuracy and 75% coverage of confident site assignment. Sites with only one possible phosphosite placement have a score of "NA". Peptides with more than one phosphorylation site were not evaluated and have no score associated
## Peptide (Inspect annotation) - Sites scoring above the threshold were defined as confident assignment and are indicated here. Phosphorylated residues are indicated my lower case (s/t/y).
## Start/End - peptide start/end position in protein
## Score - peptide score; Expect - and expectation value for the peptide match
Acc	Gene	m/z	z	Peptide (Prospector annotation)	Phosphosite confidence score	Peptide (Inspect annotation)	Start	End	Score	Expect	Protein MW	Protein Name
O00086	IMDH3_CANAL	719.355	2	VLVAQGVSGsVVDK	0.161	VLVAQGVSGsVVDK	443	456	43.6	9e-08	56239.7	Probable inosine-5'-monophosphate dehydrogenase (EC 1.1.1.205) (IMP dehydrogenase) (IMPDH) (IMPD)
O00086	IMDH3_CANAL	469.761	2	LVGIITsR	0		159	166	30.8	7.5e-05	56239.7	Probable inosine-5'-monophosphate dehydrogenase (EC 1.1.1.205) (IMP dehydrogenase) (IMPDH) (IMPD)
O13318	PHR2_CANAL	693.274	2	ASGYEsATNDYK	0.02		241	252	44.8	2.7e-09	58980.4	pH-responsive protein 2 precursor (pH-regulated protein 2)
O13327	O13327_CANAL	604.769	2	sLAYGQQSFK	0.403	sLAYGQQSFK	193	202	50.8	7.8e-09	139974	Protein phosphatase Ssd1 homolog
O13327	O13327_CANAL	626.249	2	TDsSDDIGSFK	0.015		159	169	46.1	1.4e-08	139974	Protein phosphatase Ssd1 homolog
O13327	O13327_CANAL	484.57	3	SRsLAYGQQSFK	0.001		191	202	35	2.2e-06	139974	Protein phosphatase Ssd1 homolog
O13327	O13327_CANAL	675.813	2	NSLsPTIPNEAK	0.034	NSLsPTIPNEAK	147	158	44.1	2.8e-06	139974	Protein phosphatase Ssd1 homolog
O13327	O13327_CANAL	706.661	3	SPsELTNLmVEQYNLQR	0		34	50	39.1	3e-06	139974	Protein phosphatase Ssd1 homolog
O13327	O13327_CANAL	617.799	2	SSLSYRNsIK	0.019		1119	1128	48.1	1.3e-05	139974	Protein phosphatase Ssd1 homolog
O13327	O13327_CANAL	753.356	3	RSPsELTNLMVEQYNLQR	0.017		33	50	41.2	2.4e-05	139974	Protein phosphatase Ssd1 homolog
O13327	O13327_CANAL	701.314	3	SPsELTNLMVEQYNLQR	0.013		34	50	32.5	0.00015	139974	Protein phosphatase Ssd1 homolog
O13327	O13327_CANAL	782.797	2	smPSsPTQSEIPK			1191	1203	27.6	0.00036	139974	Protein phosphatase Ssd1 homolog
O13327	O13327_CANAL	491.216	2	SSsINTHR	0.003		103	110	29.7	0.00042	139974	Protein phosphatase Ssd1 homolog
O13327	O13327_CANAL	734.815	2	sMPSSPTQSEIPK	0.294	sMPSSPTQSEIPK	1191	1203	30.3	0.00047	139974	Protein phosphatase Ssd1 homolog
O13327	O13327_CANAL	835.03	3	NSLSPTIPNEAKTDSsDDIGSFK	0		147	169	26.3	0.00059	139974	Protein phosphatase Ssd1 homolog
O13327	O13327_CANAL	734.825	2	SMPsSPTQSEIPK	0.01		1191	1203	28	0.0013	139974	Protein phosphatase Ssd1 homolog
O13327	O13327_CANAL	491.21	2	sSSINTHR	0.001		103	110	26.8	0.0022	139974	Protein phosphatase Ssd1 homolog
O13327	O13327_CANAL	774.789	2	sMPSsPTQSEIPK			1191	1203	25.9	0.0025	139974	Protein phosphatase Ssd1 homolog
O13327	O13327_CANAL	707.329	3	GNSLLPPNPNFsVTQSPDR	0.074	GNSLLPPNPNFsVTQSPDR	215	233	27.5	0.0034	139974	Protein phosphatase Ssd1 homolog
O13327	O13327_CANAL	439.906	3	RHsLGLNEAIK	NA		126	136	25.1	0.0058	139974	Protein phosphatase Ssd1 homolog
O13327	O13327_CANAL	606.944	3	qSNRNsLSPTIPNEAK	0.007		143	158	25.1	0.018	139974	Protein phosphatase Ssd1 homolog
O13327	O13327_CANAL	612.633	3	QSNRNSLsPTIPNEAK	0.029	QsNRNSLSPTIPNEAK	143	158	22	0.039	139974	Protein phosphatase Ssd1 homolog
O13428	O13428_CANAL	767.995	3	DSMRNMFDyFMtLLDSR			180	196	26.4	0.02	217985	Beta-1,3-glucan synthase catalytic subunit 1
O13428	O13428_CANAL	504.212	3	NsWIGYVRLsR			1524	1534	20.6	0.036	217985	Beta-1,3-glucan synthase catalytic subunit 1
O13430	EF2_CANAL	463.214	3	NMsVIAHVDHGK	NA		21	32	34.5	7e-06	93355	Elongation factor 2 (EF-2)
O13430	EF2_CANAL	773.831	2	ETVEGEsSMVALSK	0.003		565	578	36.5	0.00021	93355	Elongation factor 2 (EF-2)
O13430	EF2_CANAL	518.896	3	SGtITTNEAAHNMK	0		466	479	24.8	0.0017	93355	Elongation factor 2 (EF-2)
O13433	PLC1_CANAL	725.293	2	SNDSEsPPQPSPK	0.021	SNDSEsPPQPSPK	75	87	34.4	1.1e-05	124593	1-phosphatidylinositol-4,5-bisphosphate phosphodiesterase 1 (EC 3.1.4.11) (Phosphoinositide phospholipase C) (PLC-1) (Phospholipase C-1)
O13433	PLC1_CANAL	486.552	3	INKSsDNIDESR	0		119	130	25.1	0.0076	124593	1-phosphatidylinositol-4,5-bisphosphate phosphodiesterase 1 (EC 3.1.4.11) (Phosphoinositide phospholipase C) (PLC-1) (Phospholipase C-1)
O14415	SEC65_CANAL	554.295	3	MNTIVPIHsNLTLK	0.268	MNTIVPIHSNLtLK	227	240	35.8	0.0003	31124.8	Signal recognition particle SEC65 subunit
O42695	O42695_CANAL	594.781	2	IITNSSASsTK	0.003		1155	1165	51	5.7e-10	150993	CaSLN1 protein
O42695	O42695_CANAL	505.246	3	SNDStTVTVTRPR	0		910	922	19.9	0.023	150993	CaSLN1 protein
O42696	O42696_CANAL	934.375	2	SAtEGsITTISEQIDR			1066	1081	45.7	1.4e-09	118906	CaNIK1 protein
O42696	O42696_CANAL	894.398	2	SAtEGSITTISEQIDR	0.007		1066	1081	43.2	1.6e-06	118906	CaNIK1 protein
O42696	O42696_CANAL	648.643	3	RSAtEGSITTISEQIDR	0.001		1065	1081	28.4	0.0019	118906	CaNIK1 protein
O42696	O42696_CANAL	620.988	3	EIADVtRAVAKGDLsR			165	180	26.3	0.0052	118906	CaNIK1 protein
O42765	O42765_CANAL	749.282	2	GTPKPVDtDDEED	0.14	GTPKPVDtDDEED	1179	1191	38	3.8e-07	133827	Elongation-like factor
O42765	O42765_CANAL	601.776	2	YIEWLSsPK	0.023	YIEWLSsPK	1170	1178	34.1	9.9e-07	133827	Elongation-like factor
O42765	O42765_CANAL	750.335	3	STPNPNASTTsLTsLNTALAK			115	135	36.3	6.7e-06	133827	Elongation-like factor
O42765	O42765_CANAL	604.759	2	Acetyl-SKsFDDFIK	0.005		1	10	30.7	2.6e-05	133827	Elongation-like factor
O42765	O42765_CANAL	476.199	2	sFDDFIK	NA		4	10	31.8	3.7e-05	133827	Elongation-like factor
O42765	O42765_CANAL	723.679	3	STPNPNASTTsLTSLNTALAK	0		115	135	31.2	0.00032	133827	Elongation-like factor
O42765	O42765_CANAL	635.977	3	MsNVTFAYPGADKPSLK	0.043	MsNVTFAYPGADKPSLK	806	822	21.8	0.037	133827	Elongation-like factor
O42766	1433_CANAL	732.979	3	QAFDDAVADLETLsEDSYK	0.058	QAFDDAVADLETLsEDSYK	198	216	35.9	5.6e-06	29480.2	14-3-3 protein homolog
O42766	1433_CANAL	583.783	2	GNEsQVALIR	NA		75	84	23.6	0.024	29480.2	14-3-3 protein homolog
O42817	RS0_CANAL	806.859	2	Acetyl-SLPAsFDLTPEDAK	0.07	MSLPAsFDLTPEDAK	1	15	31	0.00022	27818.8	40S ribosomal protein S0
O42817	RS0_CANAL	755.834	2	FtPGNFTNYITR	0.136	FtPGNFTNYITR	102	113	24.9	0.015	27818.8	40S ribosomal protein S0
O43101	CBF5_CANAL	573.266	3	sGHYTPIPAGSAPLNR	0.019		37	52	31.4	2e-05	54322.2	Centromere/microtubule-binding protein CBF5 (Centromere-binding factor 5) (Small nucleolar RNP protein CBF5) (H/ACA snoRNP protein CBF5)
O43101	CBF5_CANAL	480.224	3	VNENtPENWKK	NA		375	385	32.8	0.00069	54322.2	Centromere/microtubule-binding protein CBF5 (Centromere-binding factor 5) (Small nucleolar RNP protein CBF5) (H/ACA snoRNP protein CBF5)
O59924	SODC_CANAL	578.598	3	HVGDLGNIStDGNGVAK	0.006		81	97	32.5	0.00066	16145.9	Superoxide dismutase [Cu-Zn] (EC 1.15.1.1)
O59931	RL13_CANAL	659.266	2	sQETFDANVAR	0.084	sQETFDANVAR	105	115	37.5	2.2e-06	23053.8	60S ribosomal protein L13
O60036	O60036_CANAL	458.737	2	KVYTtPK	0.001		83	89	26.9	0.015	17268.3	Ubiquitin fusion protein
O74136	O74136_CANAL	675.799	2	LGsITSVGsLEK			410	421	37.3	2.6e-08	196098	Phospholipase D
O74136	O74136_CANAL	632.774	2	SAtLSGFMQSR	0.002		161	171	43.4	2.9e-08	196098	Phospholipase D
O74136	O74136_CANAL	809.841	2	IDEAsEDEYGLLGK	0.097	IDEAsEDEYGLLGK	1542	1555	39.9	4.7e-06	196098	Phospholipase D
O74136	O74136_CANAL	635.813	2	LGSITSVGsLEK	0.024	LGSITSVGsLEK	410	421	42.2	7.4e-06	196098	Phospholipase D
O74136	O74136_CANAL	780.056	3	LGsITSVGsLEKHPELLELR			410	429	38.4	3.6e-05	196098	Phospholipase D
O74136	O74136_CANAL	472.897	3	RVStFAGVTENR	0		1581	1592	39.2	3.8e-05	196098	Phospholipase D
O74136	O74136_CANAL	630.777	2	VsTFAGVTENR	0.005		1582	1592	32	4.8e-05	196098	Phospholipase D
O74136	O74136_CANAL	780.056	3	LGSITsVGsLEKHPELLELR			410	429	34.2	7.2e-05	196098	Phospholipase D
O74136	O74136_CANAL	675.799	2	LGsItSVGSLEK			410	421	29.5	0.00011	196098	Phospholipase D
O74136	O74136_CANAL	772.699	3	MSVPDINDNHsLSPVPSALSR	0.036	MsVPDINDNHSLSPVPSALSR	385	405	32.2	0.00061	196098	Phospholipase D
O74136	O74136_CANAL	799.35	3	MSVPDINDNHsLsPVPSALSR			385	405	29.4	0.00072	196098	Phospholipase D
O74136	O74136_CANAL	640.779	2	SAtLSGFmQSR	0.026	sATLSGFmQSR	161	171	20.2	0.0033	196098	Phospholipase D
O74161	CHS5_CANAL	713.822	2	IESVPtDEIDTK	0.03	IESVPtDEIDTK	364	375	37.2	4.2e-06	62158	Chitin biosynthesis protein CHS5
O74161	CHS5_CANAL	859.391	2	TTSQTAGNFsAQSLPK	0.004		276	291	35.6	1.2e-05	62158	Chitin biosynthesis protein CHS5
O74161	CHS5_CANAL	573.27	3	TTSQTAGNFSAQsLPK	0.076	TTSQTAGNFSAQsLPK	276	291	26.3	0.00011	62158	Chitin biosynthesis protein CHS5
O74161	CHS5_CANAL	713.819	2	IESVPTDEIDtK	0.053	IESVPtDEIDTK	364	375	29.9	0.00011	62158	Chitin biosynthesis protein CHS5
O74161	CHS5_CANAL	899.371	2	tTSQTAGNFSAQsLPK			276	291	28.5	0.0032	62158	Chitin biosynthesis protein CHS5
O74261	HSP60_CANAL	609.306	3	RGsQAAVEAVIEFLQK	NA		134	149	51.6	7e-07	60126.2	Heat shock protein 60, mitochondrial precursor (60 kDa chaperonin) (Protein Cpn60)
O74261	HSP60_CANAL	557.279	3	GsQAAVEAVIEFLQK	NA		135	149	37.5	1.6e-05	60126.2	Heat shock protein 60, mitochondrial precursor (60 kDa chaperonin) (Protein Cpn60)
O74270	ORC1_CANAL	498.232	2	sDGASPIIR	0.327	sDGASPIIR	40	48	30.3	8.5e-06	91250.1	Origin recognition complex subunit 1
O74270	ORC1_CANAL	642.308	2	DSLPVFLsPTK	0.026	DSLPVFLsPTK	358	368	47	1.1e-05	91250.1	Origin recognition complex subunit 1
O74270	ORC1_CANAL	572.613	3	DIEDIYSVVTPtKR	0.002		336	349	30.9	8.3e-05	91250.1	Origin recognition complex subunit 1
O74270	ORC1_CANAL	557.267	3	DDRDSLPVFLsPTK	0.014		355	368	32.8	0.00011	91250.1	Origin recognition complex subunit 1
O74270	ORC1_CANAL	541.907	3	KVVITsDAIGFAsR			598	611	19.6	0.016	91250.1	Origin recognition complex subunit 1
O74698	O74698_CANAL	889.724	3	FMEEQQALQMQQtQQQQHIGR	NA		352	372	42.9	9e-09	110632	Cytoskeleton assembly control protein (Fragment)
O74698	O74698_CANAL	474.227	3	VTDDGQPIsRPR	0.103	VTDDGQPIsRPR	249	260	35.8	9.5e-06	110632	Cytoskeleton assembly control protein (Fragment)
O74698	O74698_CANAL	895.064	3	FMEEQQALQmQQtQQQQHIGR	NA		352	372	37.7	3.1e-05	110632	Cytoskeleton assembly control protein (Fragment)
O74711	PEX5_CANAL	669.792	2	EQsPEIVVDDK	NA		208	218	32.4	0.001	67325	Peroxisomal targeting signal receptor (Peroxin-5) (PTS1 receptor)
O74713	HGT1_CANAL	910.93	2	SWQPTVPIAsDAELAR	0.1	SWQPTVPIAsDAELAR	505	520	51.6	5.6e-08	60670.8	High-affinity glucose transporter
O74933	UAP1_CANAL	696.326	3	NFTQLPNEQTAsTLDLSK	0		68	85	31.2	0.0032	54644.5	UDP-N-acetylglucosamine pyrophosphorylase (EC 2.7.7.23)
O93803	CET1_CANAL	662.317	3	RNsIANIIDAYEEPATK	0.38	RNsIANIIDAYEEPATK	113	129	51.3	5.6e-08	58802	mRNA-capping enzyme subunit beta (EC 3.1.3.33) (Polynucleotide 5'-triphosphatase) (mRNA 5'-triphosphatase) (TPase)
O93803	CET1_CANAL	914.921	2	NsIANIIDAYEEPATK	0.198	NsIANIIDAYEEPATK	114	129	46	7.2e-08	58802	mRNA-capping enzyme subunit beta (EC 3.1.3.33) (Polynucleotide 5'-triphosphatase) (mRNA 5'-triphosphatase) (TPase)
O93803	CET1_CANAL	496.232	2	DNLLsPPR	NA		383	390	34.9	9.2e-06	58802	mRNA-capping enzyme subunit beta (EC 3.1.3.33) (Polynucleotide 5'-triphosphatase) (mRNA 5'-triphosphatase) (TPase)
O93803	CET1_CANAL	483.736	2	KAELNsPK	NA		133	140	34.9	1.9e-05	58802	mRNA-capping enzyme subunit beta (EC 3.1.3.33) (Polynucleotide 5'-triphosphatase) (mRNA 5'-triphosphatase) (TPase)
O93803	CET1_CANAL	671.293	3	HsITSMLNDTPSDSTPTK	0		42	59	43.3	3.5e-05	58802	mRNA-capping enzyme subunit beta (EC 3.1.3.33) (Polynucleotide 5'-triphosphatase) (mRNA 5'-triphosphatase) (TPase)
O93803	CET1_CANAL	676.634	3	HsITSmLNDTPSDSTPTK	0.015		42	59	32.5	0.00019	58802	mRNA-capping enzyme subunit beta (EC 3.1.3.33) (Polynucleotide 5'-triphosphatase) (mRNA 5'-triphosphatase) (TPase)
O93827	MPG1_CANAL	892.895	2	DFLSGtCLYLTSLSK	0.008		225	239	43.8	4.3e-09	39975.5	Mannose-1-phosphate guanyltransferase (EC 2.7.7.13) (ATP-mannose-1-phosphate guanylyltransferase) (GDP-mannose pyrophosphorylase) (CASRB1)
O93827	MPG1_CANAL	770.851	2	TEGVtVLGDDVEVK	0.082	TEGVtVLGDDVEVK	322	335	50.1	4.7e-08	39975.5	Mannose-1-phosphate guanyltransferase (EC 2.7.7.13) (ATP-mannose-1-phosphate guanylyltransferase) (GDP-mannose pyrophosphorylase) (CASRB1)
O93827	MPG1_CANAL	593.302	2	GLILVGGYGtR	0.019		3	13	34.7	1.6e-06	39975.5	Mannose-1-phosphate guanyltransferase (EC 2.7.7.13) (ATP-mannose-1-phosphate guanylyltransferase) (GDP-mannose pyrophosphorylase) (CASRB1)
O93827	MPG1_CANAL	569.789	2	SVLLANsQVK	0.319	SVLLANsQVK	291	300	33.1	1.1e-05	39975.5	Mannose-1-phosphate guanyltransferase (EC 2.7.7.13) (ATP-mannose-1-phosphate guanylyltransferase) (GDP-mannose pyrophosphorylase) (CASRB1)
O93827	MPG1_CANAL	569.788	2	sVLLANSQVK	0.438	sVLLANSQVK	291	300	27.4	1.4e-05	39975.5	Mannose-1-phosphate guanyltransferase (EC 2.7.7.13) (ATP-mannose-1-phosphate guanylyltransferase) (GDP-mannose pyrophosphorylase) (CASRB1)
O93827	MPG1_CANAL	472.217	2	sISSNVEK	0.434	sISSNVEK	350	357	36.7	2e-05	39975.5	Mannose-1-phosphate guanyltransferase (EC 2.7.7.13) (ATP-mannose-1-phosphate guanylyltransferase) (GDP-mannose pyrophosphorylase) (CASRB1)
O93827	MPG1_CANAL	654.99	3	YGVIVHDRDtPNLIDR	0.187	YGVIVHDRDtPNLIDR	144	159	28.5	0.00056	39975.5	Mannose-1-phosphate guanyltransferase (EC 2.7.7.13) (ATP-mannose-1-phosphate guanylyltransferase) (GDP-mannose pyrophosphorylase) (CASRB1)
O93827	MPG1_CANAL	506.602	3	VLPHKsISSNVEK	0.003		345	357	22.9	0.0013	39975.5	Mannose-1-phosphate guanyltransferase (EC 2.7.7.13) (ATP-mannose-1-phosphate guanylyltransferase) (GDP-mannose pyrophosphorylase) (CASRB1)
O93831	RAEP_CANAL	716.36	3	RSsVVGGIVGGGsITSLTALR			571	591	46	1.1e-07	72292.1	Rab proteins geranylgeranyltransferase component A (Rab escort protein) (REP)
O93831	RAEP_CANAL	664.322	3	SSVVGGIVGGGSItsLTALR			572	591	35.8	9.7e-06	72292.1	Rab proteins geranylgeranyltransferase component A (Rab escort protein) (REP)
O93831	RAEP_CANAL	637.657	3	sSVVGGIVGGGSITSLTALR	0		572	591	32.9	3.6e-05	72292.1	Rab proteins geranylgeranyltransferase component A (Rab escort protein) (REP)
O93831	RAEP_CANAL	637.669	3	SSVVGGIVGGGsITSLTALR	0.064	SSVVGGIVGGGsITSLTALR	572	591	36.8	8.7e-05	72292.1	Rab proteins geranylgeranyltransferase component A (Rab escort protein) (REP)
O93831	RAEP_CANAL	627.82	2	LGSsLINFVPK	0.008		459	469	27.6	0.00027	72292.1	Rab proteins geranylgeranyltransferase component A (Rab escort protein) (REP)
O93870	FCR1_CANAL	810.046	3	GEAFIGsPVTSPQQMPTSNPFR	0.036	GEAFIGsPVTSPQQMPTSNPFR	192	213	45.6	5.9e-07	56875.4	Fluconazole resistance protein 1
O93870	FCR1_CANAL	606.244	2	TSsLTsLTNK			327	336	34	6.1e-06	56875.4	Fluconazole resistance protein 1
O93870	FCR1_CANAL	566.271	2	TSsLTSLTNK	0.045	TSsLTSLTNK	327	336	35.2	4.4e-05	56875.4	Fluconazole resistance protein 1
O93870	FCR1_CANAL	836.698	3	GEAFIGsPVTsPQQMPTSNPFR			192	213	34.4	6.6e-05	56875.4	Fluconazole resistance protein 1
O93870	FCR1_CANAL	889.4	2	SFsLFSDSNGEPILGK	0.001		311	326	28.7	0.0007	56875.4	Fluconazole resistance protein 1
O93870	FCR1_CANAL	451.238	2	VVsYLIK	0.015		146	152	24	0.0049	56875.4	Fluconazole resistance protein 1
O93950	O93950_CANAL	778.35	2	qVsTDKFQTPVSR	0		179	191	24.7	0.03	22307.7	CTA6p (Fragment)
O93952	O93952_CANAL	547.266	3	TKStPEGSIEEIIR	0.001		59	72	33.9	0.00065	27394.5	CTA8p (Fragment)
O93952	O93952_CANAL	563.612	3	HSFLQELNLPGtPR	0.38	HSFLQELNLPGtPR	118	131	20.3	0.0046	27394.5	CTA8p (Fragment)
O93952	O93952_CANAL	407.179	2	RPsMSR	0.063	RPsMSR	53	58	19.1	0.032	27394.5	CTA8p (Fragment)
O94007	O94007_CANAL	747.007	3	DKtPDNGSATATPSSSHTGLSK	0.015		14	35	50.6	7.4e-08	89319.2	Serine /threonine protein kinase
O94007	O94007_CANAL	547.264	3	AEtFTHLQQLDTR	0.055	AEtFTHLQQLDTR	125	137	35.4	9.9e-08	89319.2	Serine /threonine protein kinase
O94007	O94007_CANAL	609.61	3	DGEMCsLVDLKPAALK	NA		761	776	46.1	1.3e-07	89319.2	Serine /threonine protein kinase
O94007	O94007_CANAL	505.734	2	TAtQERPK	0.049	TAtQERPK	177	184	37.3	2.4e-06	89319.2	Serine /threonine protein kinase
O94007	O94007_CANAL	567.752	2	TPsVsSLKR			51	59	30.8	4.7e-06	89319.2	Serine /threonine protein kinase
O94007	O94007_CANAL	819.848	2	NtSFYLSGVNDGER	0.001		185	198	36.5	1.6e-05	89319.2	Serine /threonine protein kinase
O94007	O94007_CANAL	646.652	3	IPsNHLSSPLSAAPHSDK	0.008		149	166	34.2	2.2e-05	89319.2	Serine /threonine protein kinase
O94007	O94007_CANAL	567.753	2	tPSVSsLKR			51	59	25	0.00015	89319.2	Serine /threonine protein kinase
O94007	O94007_CANAL	449.72	2	TPsVSSLK	0.036	TPsVSSLK	51	58	25.5	0.00024	89319.2	Serine /threonine protein kinase
O94007	O94007_CANAL	527.774	2	TPsVSSLKR	0.036	TPsVSSLKR	51	59	25.6	0.00074	89319.2	Serine /threonine protein kinase
O94007	O94007_CANAL	819.846	2	NTSFyLSGVNDGER	0.011		185	198	27.1	0.00094	89319.2	Serine /threonine protein kinase
O94007	O94007_CANAL	670.622	3	SAtDLQLGADGmCNLGYK	0.006		777	794	28.2	0.0016	89319.2	Serine /threonine protein kinase
O94007	O94007_CANAL	665.294	3	sATDLQLGADGMCNLGYK	0.003		777	794	24.3	0.0049	89319.2	Serine /threonine protein kinase
O94007	O94007_CANAL	614.95	3	DGEmCsLVDLKPAALK	NA		761	776	27.7	0.0084	89319.2	Serine /threonine protein kinase
O94007	O94007_CANAL	749.625	3	TDEPLPSNSSVHsNDSsSAR			628	647	23.3	0.012	89319.2	Serine /threonine protein kinase
O94007	O94007_CANAL	408.526	3	ESKPItPPmK	0.045	ESKPItPPmK	40	49	17.1	0.019	89319.2	Serine /threonine protein kinase
O94008	RL32_CANAL	704.307	2	sYAAEIASSVSSR	0		92	104	50.9	3.7e-07	14956.7	60S ribosomal protein L32
O94008	RL32_CANAL	469.88	3	SYAAEIASSVSsR	0.006		92	104	24.5	0.0017	14956.7	60S ribosomal protein L32
O94008	RL32_CANAL	518.264	2	LGVKVtNPK	NA		116	124	25.3	0.0018	14956.7	60S ribosomal protein L32
O94017	RS16_CANAL	602.765	2	Acetyl-STQsVQTFGK	0.007		1	11	21.4	0.0011	15739.5	40S ribosomal protein S16
O94017	RS16_CANAL	477.728	2	TLLVADsR	0.285	TLLVADsR	114	121	25.1	0.0096	15739.5	40S ribosomal protein S16
O94035	O94035_CANAL	473.223	3	RGsVEVSSDVFR	0.598	RGsVEVSSDVFR	604	615	37.3	8.3e-06	67666.1	CBS domain protein
O94035	O94035_CANAL	515.925	3	RGsVEVSSDVFRK	0.267	RGsVEVSSDVFRK	604	616	35.2	4.1e-05	67666.1	CBS domain protein
O94035	O94035_CANAL	631.267	2	GsVEVSSDVFR	0.242	GsVEVSSDVFR	605	615	24.5	0.00027	67666.1	CBS domain protein
O94035	O94035_CANAL	461.704	2	qmPKsPR	NA		9	15	25	0.00055	67666.1	CBS domain protein
O94035	O94035_CANAL	453.703	2	qMPKsPR	NA		9	15	27.2	0.0012	67666.1	CBS domain protein
O94035	O94035_CANAL	462.226	2	QMPKsPR	NA		9	15	23	0.0016	67666.1	CBS domain protein
O94038	ADH2_CANAL	551.907	3	YSGVCHtDLHAWK	0.136	YSGVCHtDLHAWK	40	52	32.6	1.2e-05	36807.5	Alcohol dehydrogenase 2 (EC 1.1.1.1)
O94039	TKT1_CANAL	712.849	2	PsLDELTISTIR	0.111	PsLDELTISTIR	1	13	34.9	6.8e-06	73774.6	Transketolase 1 (EC 2.2.1.1) (TK 1)
O94039	TKT1_CANAL	631.621	3	qGSHDVHGsPLKPDDIK	0.004		255	271	34.8	3.2e-05	73774.6	Transketolase 1 (EC 2.2.1.1) (TK 1)
O94039	TKT1_CANAL	841.383	3	AEGsVDFQPPSTGLGNYDGVYIR	0.214	AEGsVDFQPPSTGLGNYDGVYIR	388	410	31.4	0.00042	73774.6	Transketolase 1 (EC 2.2.1.1) (TK 1)
O94039	TKT1_CANAL	501.604	3	KLsENVINALHGK	NA		357	369	22.6	0.0012	73774.6	Transketolase 1 (EC 2.2.1.1) (TK 1)
O94039	TKT1_CANAL	643.298	3	IPEFIGGsADLTGSNLTR	0.025	IPEFIGGsADLTGSNLTR	370	387	29.3	0.0018	73774.6	Transketolase 1 (EC 2.2.1.1) (TK 1)
O94039	TKT1_CANAL	502.744	2	qLLsPLDR	NA		668	675	19.3	0.0062	73774.6	Transketolase 1 (EC 2.2.1.1) (TK 1)
O94039	TKT1_CANAL	478.238	4	QGSHDVHGsPLKPDDIK	0.021	QGSHDVHGsPLKPDDIK	255	271	21.8	0.027	73774.6	Transketolase 1 (EC 2.2.1.1) (TK 1)
O94041	O94041_CANAL	650.757	2	SQsPMVSNENK	0.023	SQsPMVSNENK	454	464	35.1	2.6e-07	74785.3	Possible regulatory protein
O94041	O94041_CANAL	789.717	3	SVsPLASTDNHTHAPAAVSTPVK	0.012		391	413	36.4	5.5e-07	74785.3	Possible regulatory protein
O94041	O94041_CANAL	458.702	2	SmsVIQR	0.071	SmsVIQR	596	602	26.2	9.7e-06	74785.3	Possible regulatory protein
O94041	O94041_CANAL	468.56	3	VNNNHELQIsR	NA		443	453	36.7	1.4e-05	74785.3	Possible regulatory protein
O94041	O94041_CANAL	679.769	2	sESSsPLVGHAK			431	442	30.7	0.00012	74785.3	Possible regulatory protein
O94041	O94041_CANAL	450.701	2	SMsVIQR	0.119	SMsVIQR	596	602	34.2	0.00026	74785.3	Possible regulatory protein
O94041	O94041_CANAL	816.371	3	sVSPLASTDNHTHAPAAVStPVK			391	413	22.9	0.00043	74785.3	Possible regulatory protein
O94041	O94041_CANAL	450.705	2	sMSVIQR	0.135	sMSVIQR	596	602	31.2	0.00073	74785.3	Possible regulatory protein
O94041	O94041_CANAL	644.636	3	VLPPGLNHDTsMNSTLR	0		414	430	20.3	0.0094	74785.3	Possible regulatory protein
O94043	O94043_CANAL	605.575	3	EHDADDDLDsLFTNK	0.202	EHDADDDLDsLFTNK	1100	1114	42.8	1.5e-06	128265	Possible regulatory protein
O94043	O94043_CANAL	516.601	3	LSNGKPAATSPLsPK	0.076	LSNGKPAATSPLsPK	1033	1047	29.8	0.00018	128265	Possible regulatory protein
O94047	O94047_CANAL	712.044	3	KPINYQGtPTTSAALLHNK	0.04	KPINYQGtPTTSAALLHNK	50	68	43.7	6.9e-10	67514	Glucose-repressible alcohol dehydrogenase transcriptional effector (Fragment)
O94047	O94047_CANAL	637.248	3	StQDIFEDDSMEEQR	0		70	84	42.2	9.9e-06	67514	Glucose-repressible alcohol dehydrogenase transcriptional effector (Fragment)
O94047	O94047_CANAL	603.251	2	LNSIPsSIsK			128	137	18.7	0.012	67514	Glucose-repressible alcohol dehydrogenase transcriptional effector (Fragment)
O94049	ACS1_CANAL	545.587	3	tKPNLADFETYQK	0.436	tKPNLADFETYQK	30	42	38.9	1.8e-05	75101	Acetyl-coenzyme A synthetase 1 (EC 6.2.1.1) (Acetate--CoA ligase 1) (Acyl-activating enzyme 1)
O94049	ACS1_CANAL	617.297	3	SKtKPNLADFETYQK	0.014		28	42	24.5	0.00017	75101	Acetyl-coenzyme A synthetase 1 (EC 6.2.1.1) (Acetate--CoA ligase 1) (Acyl-activating enzyme 1)
O94053	O94053_CANAL	457.724	2	DFKLsPK	NA		647	653	33	3.8e-06	74888.9	Kinesin-like protein
O94053	O94053_CANAL	524.743	2	sSSPIQPPR	0.009		42	50	23.3	0.002	74888.9	Kinesin-like protein
O94056	O94056_CANAL	450.195	2	QQFsGPR	NA		90	96	26.9	0.0017	28597.8	Hypothetical protein Ca38F10.10c
O94056	O94056_CANAL	441.686	2	qQFsGPR	NA		90	96	27.9	0.0022	28597.8	Hypothetical protein Ca38F10.10c
O94057	O94057_CANAL	699.342	3	NLKDsAPSSSANLVELDKK	0.037	NLKDsAPSSSANLVELDKK	240	258	34.2	7.1e-05	82152.6	Hypothetical membrane protein
O94057	O94057_CANAL	656.644	3	NLKDsAPSSSANLVELDK	0.05	NLKDsAPSSSANLVELDK	240	257	34.7	0.00064	82152.6	Hypothetical membrane protein
O94058	O94058_CANAL	466.576	3	LKPTLMGISEtK	0		37	48	34.8	6.3e-06	85563.4	Hypothetical protein Ca38F10.12c
O94058	O94058_CANAL	654.311	2	SVTtPIELPDR	0.01		690	700	32.5	7.9e-05	85563.4	Hypothetical protein Ca38F10.12c
O94058	O94058_CANAL	471.916	3	LKPTLmGISEtK	0		37	48	30.8	0.00011	85563.4	Hypothetical protein Ca38F10.12c
O94058	O94058_CANAL	509.274	3	KLKPTLMGISEtK	0.004		36	48	25.8	0.00025	85563.4	Hypothetical protein Ca38F10.12c
O94060	O94060_CANAL	899.371	2	SAGDDVPPPAYsPTESK	0.002		51	67	34.5	0.00076	25964.8	Hypothetical transmembrane protein
O94083	IF5A_CANAL	488.716	2	IVDmSTsK	0		40	47	34.1	5.3e-07	16995.3	Eukaryotic translation initiation factor 5A (eIF-5A) (eIF-4D)
O94083	IF5A_CANAL	750.35	3	KLEDLsPSTHNmEVPNVSR	0.045	KLEDLsPSTHNmEVPNVSR	68	86	40.6	1.2e-06	16995.3	Eukaryotic translation initiation factor 5A (eIF-5A) (eIF-4D)
O94083	IF5A_CANAL	745.017	3	KLEDLsPSTHNMEVPNVSR	0.043	KLEDLsPSTHNMEVPNVSR	68	86	40.1	1.7e-05	16995.3	Eukaryotic translation initiation factor 5A (eIF-5A) (eIF-4D)
O94083	IF5A_CANAL	702.3	3	LEDLSPStHNMEVPNVSR	0		69	86	34.4	9.6e-05	16995.3	Eukaryotic translation initiation factor 5A (eIF-5A) (eIF-4D)
O94083	IF5A_CANAL	480.713	2	IVDMSTsK	0.003		40	47	28.8	0.00025	16995.3	Eukaryotic translation initiation factor 5A (eIF-5A) (eIF-4D)
O94118	O94118_CANAL	844.356	2	NFsDIASPANLDDTK	0.154	NFsDIASPANLDDTK	7	21	47.2	9.5e-10	54998.8	Cap1 (Hypothetical protein CAP1)
O94118	O94118_CANAL	605.938	3	NFsDIASPANLDDTKK	0.098	NFsDIASPANLDDTKK	7	22	41	2.3e-05	54998.8	Cap1 (Hypothetical protein CAP1)
O94118	O94118_CANAL	605.939	3	NFSDIAsPANLDDTKK	0.037	NFSDIAsPANLDDTKK	7	22	31.3	0.00081	54998.8	Cap1 (Hypothetical protein CAP1)
O94201	K6PF1_CANAL	673.638	3	FGsFEEISPSEVGGGNGLR	0.097	FGsFEEISPSEVGGGNGLR	208	226	43.5	2.1e-07	108599	6-phosphofructokinase subunit alpha (EC 2.7.1.11) (Phosphofructokinase 1) (Phosphohexokinase) (6PF-1-K subunit alpha) (CaPFK1)
O94201	K6PF1_CANAL	513.72	2	PSsSDAINR	0.05	PSsSDAINR	1	10	44	4.2e-07	108599	6-phosphofructokinase subunit alpha (EC 2.7.1.11) (Phosphofructokinase 1) (Phosphohexokinase) (6PF-1-K subunit alpha) (CaPFK1)
O94201	K6PF1_CANAL	487.209	2	GGtAVAFDR	NA		514	522	30.3	5.7e-06	108599	6-phosphofructokinase subunit alpha (EC 2.7.1.11) (Phosphofructokinase 1) (Phosphohexokinase) (6PF-1-K subunit alpha) (CaPFK1)
O94201	K6PF1_CANAL	900.385	3	SQLGsKFGsFEEISPSEVGGGNGLR			202	226	38.5	1.1e-05	108599	6-phosphofructokinase subunit alpha (EC 2.7.1.11) (Phosphofructokinase 1) (Phosphohexokinase) (6PF-1-K subunit alpha) (CaPFK1)
O94201	K6PF1_CANAL	673.637	3	FGSFEEIsPSEVGGGNGLR	0.018		208	226	36.9	8.5e-05	108599	6-phosphofructokinase subunit alpha (EC 2.7.1.11) (Phosphofructokinase 1) (Phosphohexokinase) (6PF-1-K subunit alpha) (CaPFK1)
O94201	K6PF1_CANAL	716.334	3	FGsFEEISPSEVGGGNGLRK	0.166	FGsFEEISPSEVGGGNGLRK	208	227	31.5	0.00026	108599	6-phosphofructokinase subunit alpha (EC 2.7.1.11) (Phosphofructokinase 1) (Phosphohexokinase) (6PF-1-K subunit alpha) (CaPFK1)
P10613	CP51_CANAL	687.314	2	GVSsPYLPFGGGR	0		455	467	28.6	0.00061	60676	Cytochrome P450 51 (EC 1.14.13.70) (CYPLI) (P450-LIA1) (Sterol 14-alpha demethylase) (Lanosterol 14-alpha demethylase) (P450-14DM)
P10875	TBB_CANAL	597.27	3	SVtVPELTQQmFDAK	0.01		283	297	38.6	7.5e-08	49942.4	Tubulin beta chain (Beta tubulin)
P10875	TBB_CANAL	831.915	2	AVLVDLEPGtIDNVK	NA		63	77	29.6	4.1e-05	49942.4	Tubulin beta chain (Beta tubulin)
P10875	TBB_CANAL	546.916	3	sKLDVYFNEATSGK	0.043	sKLDVYFNEATSGK	45	58	29.7	8.7e-05	49942.4	Tubulin beta chain (Beta tubulin)
P10875	TBB_CANAL	591.937	3	SVtVPELTQQMFDAK	0.007		283	297	32.4	0.00018	49942.4	Tubulin beta chain (Beta tubulin)
P14235	ACT_CANAL	622.285	2	EITALAPsSmK	0.011		317	327	43.4	8.5e-09	41753	Actin
P14235	ACT_CANAL	614.285	2	EITALAPsSMK	0.01		317	327	32.6	2e-05	41753	Actin
P14235	ACT_CANAL	563.579	3	qEYDESGPsIVHHK	0.02		361	374	30.5	7e-05	41753	Actin
P16017	EF1A_CANAL	710.865	2	qTVAVGVIKsVEK	0.062	qtVAVGVIKSVEK	429	441	50.4	2.3e-10	50012.2	Elongation factor 1-alpha (EF-1-alpha)
P16017	EF1A_CANAL	489.248	2	qtVAVGVIK	NA		429	437	42.5	3e-08	50012.2	Elongation factor 1-alpha (EF-1-alpha)
P16017	EF1A_CANAL	487.737	2	tIEKFEK	NA		38	44	31.7	1.5e-06	50012.2	Elongation factor 1-alpha (EF-1-alpha)
P16017	EF1A_CANAL	600.784	2	STTtGHLIYK	0.002		21	30	36.6	5e-06	50012.2	Elongation factor 1-alpha (EF-1-alpha)
P16017	EF1A_CANAL	600.79	2	STtTGHLIYK	0.016		21	30	35.3	6.1e-06	50012.2	Elongation factor 1-alpha (EF-1-alpha)
P16017	EF1A_CANAL	466.243	3	DMRQtVAVGVIK	NA		426	437	36.6	8.1e-06	50012.2	Elongation factor 1-alpha (EF-1-alpha)
P16017	EF1A_CANAL	420.223	2	VEtGIIK	NA		265	271	31.9	1.2e-05	50012.2	Elongation factor 1-alpha (EF-1-alpha)
P16017	EF1A_CANAL	466.214	2	FDtLVEK	NA		370	376	33.7	2.8e-05	50012.2	Elongation factor 1-alpha (EF-1-alpha)
P16017	EF1A_CANAL	858.382	3	sVEMHHEQLAEGVPGDNVGFNVK	NA		289	311	39.2	4.4e-05	50012.2	Elongation factor 1-alpha (EF-1-alpha)
P16017	EF1A_CANAL	497.762	2	QtVAVGVIK	NA		429	437	26.7	0.00018	50012.2	Elongation factor 1-alpha (EF-1-alpha)
P16017	EF1A_CANAL	863.721	3	sVEmHHEQLAEGVPGDNVGFNVK	NA		289	311	28.7	0.01	50012.2	Elongation factor 1-alpha (EF-1-alpha)
P22011	PPIA_CANAL	769.825	2	Acetyl-sTVYFDVSADGQK	0.006		1	14	36.3	2.2e-06	17575.1	Peptidyl-prolyl cis-trans isomerase (EC 5.2.1.8) (PPIase) (Rotamase) (Cyclophilin) (Cyclosporin A-binding protein) (CPH)
P22011	PPIA_CANAL	566.934	3	SIYGtKFADENFVK	0.019		75	88	29.7	2.7e-05	17575.1	Peptidyl-prolyl cis-trans isomerase (EC 5.2.1.8) (PPIase) (Rotamase) (Cyclophilin) (Cyclosporin A-binding protein) (CPH)
P22011	PPIA_CANAL	479.226	3	KIESFGSGsGATSK	0.059	KIESFGSGsGATSK	139	152	30.3	0.00033	17575.1	Peptidyl-prolyl cis-trans isomerase (EC 5.2.1.8) (PPIase) (Rotamase) (Cyclophilin) (Cyclosporin A-binding protein) (CPH)
P22011	PPIA_CANAL	654.278	2	IESFGSGsGATSK	0.002		140	152	23.2	0.0045	17575.1	Peptidyl-prolyl cis-trans isomerase (EC 5.2.1.8) (PPIase) (Rotamase) (Cyclophilin) (Cyclosporin A-binding protein) (CPH)
P24866	CG11_CANAL	614.801	2	SsISSAVTAVAR	0		212	223	42	7.2e-07	73108.2	G1/S-specific cyclin CLN1
P24866	CG11_CANAL	629.302	2	LTSINStNSLK	0		581	591	33.2	0.00012	73108.2	G1/S-specific cyclin CLN1
P28877	PMA1_CANAL	952.424	2	GYLVAmTGDGVNDAPsLK	0.139	GYLVAmTGDGVNDAPsLK	603	620	39.8	1.3e-08	97460.9	Plasma membrane ATPase 1 (EC 3.6.3.6) (Proton pump 1)
P28877	PMA1_CANAL	702.802	2	SLEDFLVsMQR	0.368	SLEDFLVsMQR	876	886	46.5	8.6e-08	97460.9	Plasma membrane ATPase 1 (EC 3.6.3.6) (Proton pump 1)
P28877	PMA1_CANAL	944.431	2	GYLVAMTGDGVNDAPsLK	0.112	GYLVAMTGDGVNDAPsLK	603	620	38.7	3.1e-07	97460.9	Plasma membrane ATPase 1 (EC 3.6.3.6) (Proton pump 1)
P28877	PMA1_CANAL	710.805	2	SLEDFLVsmQR	0.357	SLEDFLVsmQR	876	886	38.9	9.6e-07	97460.9	Plasma membrane ATPase 1 (EC 3.6.3.6) (Proton pump 1)
P28877	PMA1_CANAL	636.802	2	YNAVEILQsR	0.358	YNAVEILQsR	593	602	38.7	3.1e-06	97460.9	Plasma membrane ATPase 1 (EC 3.6.3.6) (Proton pump 1)
P28877	PMA1_CANAL	672.649	3	GYLVAMTGDGVNDAPsLKK	0.012		603	621	39.4	7.1e-06	97460.9	Plasma membrane ATPase 1 (EC 3.6.3.6) (Proton pump 1)
P30418	NMT_CANAL	456.226	2	sIEELLK	NA		17	23	36.6	4.2e-06	51877.5	Glycylpeptide N-tetradecanoyltransferase (EC 2.3.1.97) (Peptide N-myristoyltransferase) (Myristoyl-CoA:protein N-myristoyltransferase) (NMT)
P30418	NMT_CANAL	528.261	3	SNSAPSKsIEELLK	0.005		10	23	27	0.00035	51877.5	Glycylpeptide N-tetradecanoyltransferase (EC 2.3.1.97) (Peptide N-myristoyltransferase) (Myristoyl-CoA:protein N-myristoyltransferase) (NMT)
P30572	CHS2_CANAL	761.827	2	sFEEPPPQQEVR	NA		222	233	44.3	6.1e-06	115587	Chitin synthase 2 (EC 2.4.1.16) (Chitin-UDP acetyl-glucosaminyl transferase 2)
P30573	CHS3_CANAL	480.702	2	sVSGGFNGR	0.246	sVSGGFNGR	590	598	30.7	2.5e-05	136209	Chitin synthase 3 (EC 2.4.1.16) (Chitin-UDP acetyl-glucosaminyl transferase 3) (Class-IV chitin synthase 3)
P30573	CHS3_CANAL	703.302	3	EVYGLNDEINDYGSsPKK	0		125	142	26.6	0.00025	136209	Chitin synthase 3 (EC 2.4.1.16) (Chitin-UDP acetyl-glucosaminyl transferase 3) (Class-IV chitin synthase 3)
P30573	CHS3_CANAL	777.993	3	tVAGGDKGDHSAVEGKFDssK			1129	1149	23.2	0.0043	136209	Chitin synthase 3 (EC 2.4.1.16) (Chitin-UDP acetyl-glucosaminyl transferase 3) (Class-IV chitin synthase 3)
P30573	CHS3_CANAL	632.622	3	FHYtQVANQESNHIK	0.012		46	60	22.6	0.038	136209	Chitin synthase 3 (EC 2.4.1.16) (Chitin-UDP acetyl-glucosaminyl transferase 3) (Class-IV chitin synthase 3)
P30574	CBPY_CANAL	721.8	2	LDLsYDKLTsK			37	47	33.3	1.7e-05	61044.8	Carboxypeptidase Y precursor (EC 3.4.16.5) (Carboxypeptidase YSCY)
P30575	ENO1_CANAL	861.415	2	IQIVGDDLTVTNPtR	0.079	IQIVGDDLTVTNPtR	319	333	41.2	3.7e-07	47231.9	Enolase 1 (EC 4.2.1.11) (2-phosphoglycerate dehydratase) (2-phospho-D-glycerate hydro-lyase)
P30575	ENO1_CANAL	619.632	3	IDEFLLSLDGTPNKsK	0.008		91	106	35.7	8.7e-07	47231.9	Enolase 1 (EC 4.2.1.11) (2-phosphoglycerate dehydratase) (2-phospho-D-glycerate hydro-lyase)
P30575	ENO1_CANAL	861.418	2	IQIVGDDLtVTNPTR	0.067	IQIVGDDLtVTNPTR	319	333	37	4.2e-06	47231.9	Enolase 1 (EC 4.2.1.11) (2-phosphoglycerate dehydratase) (2-phospho-D-glycerate hydro-lyase)
P30575	ENO1_CANAL	821.385	2	IDEFLLSLDGtPNK	0.079	IDEFLLSLDGtPNK	91	104	38.3	1.6e-05	47231.9	Enolase 1 (EC 4.2.1.11) (2-phosphoglycerate dehydratase) (2-phospho-D-glycerate hydro-lyase)
P30575	ENO1_CANAL	794.859	2	IEEELGsEAIYAGK	0.281	IEEELGsEAIYAGK	419	432	35.7	2.1e-05	47231.9	Enolase 1 (EC 4.2.1.11) (2-phosphoglycerate dehydratase) (2-phospho-D-glycerate hydro-lyase)
P30575	ENO1_CANAL	556.96	3	IGSEVYHNLKsLTK	0.035	IGSEVyHNLKSLTK	187	200	31.9	7.4e-05	47231.9	Enolase 1 (EC 4.2.1.11) (2-phosphoglycerate dehydratase) (2-phospho-D-glycerate hydro-lyase)
P30575	ENO1_CANAL	681.311	3	KYGQsAGNVGDEGGVAPDIK	0.006		202	221	38.4	8.5e-05	47231.9	Enolase 1 (EC 4.2.1.11) (2-phosphoglycerate dehydratase) (2-phospho-D-glycerate hydro-lyase)
P30575	ENO1_CANAL	620.305	2	IGsEVYHNLK	0.04	IGsEVYHNLK	187	196	32	0.0004	47231.9	Enolase 1 (EC 4.2.1.11) (2-phosphoglycerate dehydratase) (2-phospho-D-glycerate hydro-lyase)
P30575	ENO1_CANAL	661.645	3	sIVPsGASTGVHEALELR			34	51	31.4	0.00071	47231.9	Enolase 1 (EC 4.2.1.11) (2-phosphoglycerate dehydratase) (2-phospho-D-glycerate hydro-lyase)
P30575	ENO1_CANAL	441.683	2	YVYDsR	0.013		11	16	24.7	0.0016	47231.9	Enolase 1 (EC 4.2.1.11) (2-phosphoglycerate dehydratase) (2-phospho-D-glycerate hydro-lyase)
P30575	ENO1_CANAL	957.405	2	YGQsAGNVGDEGGVAPDIK	0.007		203	221	34.3	0.0021	47231.9	Enolase 1 (EC 4.2.1.11) (2-phosphoglycerate dehydratase) (2-phospho-D-glycerate hydro-lyase)
P30575	ENO1_CANAL	441.746	2	IKtAIEK	NA		334	340	27	0.0054	47231.9	Enolase 1 (EC 4.2.1.11) (2-phosphoglycerate dehydratase) (2-phospho-D-glycerate hydro-lyase)
P31353	PMM_CANAL	679.331	2	VVIGFVGGsDLSK	0.022	VVIGFVGGsDLSK	43	55	39.6	1.5e-07	29019	Phosphomannomutase (EC 5.4.2.8) (PMM)
P31353	PMM_CANAL	525.915	3	TIGHAVNsPDDTIR	0.03	TIGHAVNsPDDTIR	230	243	22.8	0.015	29019	Phosphomannomutase (EC 5.4.2.8) (PMM)
P33153	CRL1_CANAL	460.208	3	VLGGSNGGSGNHsR	0.013		258	271	27.5	0.0011	39142.4	GTP-binding RHO-like protein precursor
P33153	CRL1_CANAL	414.521	3	RHsAYMGSPR	0.028	RHsAYMGSPR	8	17	20.4	0.014	39142.4	GTP-binding RHO-like protein precursor
P34732	SEC18_CANAL	647.785	2	VSNSPSsPSQPK	0.007		9	20	44.4	2.5e-05	88926.7	Vesicular-fusion protein SEC18
P34732	SEC18_CANAL	647.784	2	VSNSPsSPSQPK	0.002		9	20	39.3	5.1e-05	88926.7	Vesicular-fusion protein SEC18
P39826	CDC3_CANAL	757.654	3	IFKPTDFEYDEEEsANTR	0.029	IFKPTDFEYDEEEsANTR	211	228	38.8	1.2e-06	47841.8	Cell division control protein 3
P39827	CDC10_CANAL	591.618	3	sIEEPSTQHIAQPQK	0		1	16	37	1.6e-05	40654.3	Cell division control protein 10
P39827	CDC10_CANAL	565.268	3	ENASNPNRQsQLQK	0.092	ENASNPNRQsQLQK	309	322	40.5	2.1e-05	40654.3	Cell division control protein 10
P41797	HSP71_CANAL	776.331	2	TtPSFVAFTDTER	0		35	47	42.4	4.1e-09	70324.6	Heat shock protein SSA1
P41797	HSP71_CANAL	698.309	2	NQLESYAYsLK	0.019		539	549	45.8	1e-07	70324.6	Heat shock protein SSA1
P41797	HSP71_CANAL	776.325	2	TTPSFVAFtDTER	0.021	TTPSFVAFtDTER	35	47	34.9	0.00012	70324.6	Heat shock protein SSA1
P41797	HSP71_CANAL	605.957	3	LSKEEIDKMVsEAEK	0.056	LSKEEIDKMVsEAEK	509	523	26.6	0.00025	70324.6	Heat shock protein SSA1
P41797	HSP71_CANAL	484.748	2	NsTIPTKK	0.03	NsTIPTKK	416	423	28.5	0.00059	70324.6	Heat shock protein SSA1
P41797	HSP71_CANAL	420.7	2	NStIPTK	0.013		416	422	24.5	0.00073	70324.6	Heat shock protein SSA1
P41797	HSP71_CANAL	484.744	2	NStIPTKK	0.02		416	423	23.5	0.001	70324.6	Heat shock protein SSA1
P41797	HSP71_CANAL	418.882	3	GRLsKEEIDK	NA		507	516	19.9	0.0043	70324.6	Heat shock protein SSA1
P41797	HSP71_CANAL	437.176	2	MVsEAEK	NA		517	523	18.2	0.0096	70324.6	Heat shock protein SSA1
P42800	INO1_CANAL	472.206	2	Acetyl-StPIEFK	0.021	MsTPIEFK	1	8	21.7	0.0028	57779.2	Inositol-3-phosphate synthase (EC 5.5.1.4) (Myo-inositol-1-phosphate synthase) (MI-1-P synthase) (IPS)
P43057	KPC1_CANAL	776.335	3	STTsTFCGTPEFmAPEIVAGK	0		925	945	40	1.7e-06	125314	Protein kinase C-like 1 (EC 2.7.11.13) (PKC 1)
P43057	KPC1_CANAL	696.674	3	LtPVETVLTSEMQEQFR	0.036	LtPVETVLTSEMQEQFR	1070	1086	50.3	5.4e-06	125314	Protein kinase C-like 1 (EC 2.7.11.13) (PKC 1)
P43057	KPC1_CANAL	771.002	3	sTTSTFCGTPEFMAPEIVAGK	0.006		925	945	32.9	5.6e-06	125314	Protein kinase C-like 1 (EC 2.7.11.13) (PKC 1)
P43057	KPC1_CANAL	655.662	3	SLRPASVVHQDtNFVSK	0.065	SLRPASVVHQDtNFVSK	590	606	29.1	0.00042	125314	Protein kinase C-like 1 (EC 2.7.11.13) (PKC 1)
P43058	DUT_CANAL	764.32	2	EIsLEELDNTER	0.416	EIsLEELDNTER	137	148	44.5	8.2e-06	16945.2	Deoxyuridine 5'-triphosphate nucleotidohydrolase (EC 3.6.1.23) (dUTPase) (dUTP pyrophosphatase)
P43058	DUT_CANAL	471.742	2	VYLRsPK	0.005		21	27	25.4	0.0003	16945.2	Deoxyuridine 5'-triphosphate nucleotidohydrolase (EC 3.6.1.23) (dUTPase) (dUTP pyrophosphatase)
P43063	CDC28_CANAL	539.918	3	AYtHEVVTLWYR	0.001		164	175	24.4	0.0037	36647.3	Cell division control protein 28 (EC 2.7.11.22)
P43065	LYS1_CANAL	424.567	3	Acetyl-SKsPVILHLR	0.019		1	11	22.6	0.00062	42394.8	Saccharopine dehydrogenase [NAD+, L-lysine-forming] (EC 1.5.1.7) (Lysine--2-oxoglutarate reductase) (SDH)
P43065	LYS1_CANAL	520.235	2	DTsPVWVR	0.008		360	367	27.2	0.00097	42394.8	Saccharopine dehydrogenase [NAD+, L-lysine-forming] (EC 1.5.1.7) (Lysine--2-oxoglutarate reductase) (SDH)
P43067	ADH1_CANAL	690.804	2	sLGAEAYVDFTK	0.125	sLGAEAYVDFTK	215	226	37.8	2e-09	36879.6	Alcohol dehydrogenase 1 (EC 1.1.1.1) (40 kDa allergen) (Allergen Cand a 1) (Can a 1) (Can a I)
P43067	ADH1_CANAL	698.837	2	IVGLsDLPEVFK	NA		322	333	40.4	2.4e-06	36879.6	Alcohol dehydrogenase 1 (EC 1.1.1.1) (40 kDa allergen) (Allergen Cand a 1) (Can a 1) (Can a I)
P43067	ADH1_CANAL	493.898	3	KDtAEAIDFFSR	0.916	KDtAEAIDFFSR	302	313	40.8	8.4e-05	36879.6	Alcohol dehydrogenase 1 (EC 1.1.1.1) (40 kDa allergen) (Allergen Cand a 1) (Can a 1) (Can a I)
P43067	ADH1_CANAL	412.187	2	Acetyl-sEQIPK	NA		1	7	20.1	0.028	36879.6	Alcohol dehydrogenase 1 (EC 1.1.1.1) (40 kDa allergen) (Allergen Cand a 1) (Can a 1) (Can a I)
P43068	MKC1_CANAL	798.967	3	GFSENPDENAGFMtEyVATR			198	217	49.9	3.8e-08	58192.5	Mitogen-activated protein kinase MKC1 (EC 2.7.11.24) (MAP kinase MKC1)
P43068	MKC1_CANAL	772.327	3	GFSENPDENAGFMtEYVATR	0.042	GFSENPDENAGFMtEYVATR	198	217	39	2.4e-06	58192.5	Mitogen-activated protein kinase MKC1 (EC 2.7.11.24) (MAP kinase MKC1)
P43068	MKC1_CANAL	562.966	3	ITNIFsKNILCKR	0.233	ITNIFsKNILCKR	76	88	22.1	0.03	58192.5	Mitogen-activated protein kinase MKC1 (EC 2.7.11.24) (MAP kinase MKC1)
P43069	CDC25_CANAL	618.739	2	EGsAAGSFDSTK	0.335	EGsAAGSFDSTK	312	323	39.1	2.3e-08	152014	Cell division control protein 25
P43069	CDC25_CANAL	695.301	3	KNsVVSFASSETSmPSDSK	0.038	KNsVVSFASSETSmPSDSK	147	165	42.2	8.8e-07	152014	Cell division control protein 25
P43069	CDC25_CANAL	689.967	3	KNsVVSFASSETSMPSDSK	0.043	KNsVVSFASSETSMPSDSK	147	165	35.7	3.6e-06	152014	Cell division control protein 25
P43069	CDC25_CANAL	653.946	3	SSSsSAFQsPASSLSTIR			471	488	32.1	3.8e-05	152014	Cell division control protein 25
P43069	CDC25_CANAL	637.253	3	DSNVSMSTQSSGSsYHR	0.007		325	341	32.3	0.0012	152014	Cell division control protein 25
P43069	CDC25_CANAL	527.741	2	NSPANsTRK	0.02		139	147	19	0.029	152014	Cell division control protein 25
P43071	CDR1_CANAL	673.262	2	GStGSVDFPENR	0.004		845	856	37.8	2.4e-07	169939	Multidrug resistance protein CDR1
P43071	CDR1_CANAL	650.291	3	tFTHDSFKDDSSAGLLK	0.009		49	65	39.6	2.4e-07	169939	Multidrug resistance protein CDR1
P43071	CDR1_CANAL	531.721	2	TFtHDSFK	0.01		49	56	34.2	7e-07	169939	Multidrug resistance protein CDR1
P43071	CDR1_CANAL	741.653	3	LDYQDEAEAVNNEKFtEK	0.117	LDYQDEAEAVNNEKFtEK	827	844	27.5	0.0016	169939	Multidrug resistance protein CDR1
P43071	CDR1_CANAL	644.259	3	FTEKGsTGsVDFPENR			841	856	23	0.0032	169939	Multidrug resistance protein CDR1
P43071	CDR1_CANAL	454.538	3	MSSQDEsKLEK	0.054	MSSQDEsKLEK	6	16	23.8	0.0034	169939	Multidrug resistance protein CDR1
P43071	CDR1_CANAL	644.26	3	FtEKGsTGSVDFPENR			841	856	24.8	0.014	169939	Multidrug resistance protein CDR1
P43074	WHS11_CANAL	478.554	3	ATSENDKsFVQK	0.022	ATsENDKSFVQK	44	55	29	0.00091	6995.7	White colony protein WHS11
P43075	TRNL_CANAL	773.324	2	SKsDENLVESVMK	0.033	SKsDENLVESVMK	541	553	39.3	1e-05	95569.9	tRNA ligase (EC 6.5.1.3)
P43075	TRNL_CANAL	754.008	3	IDDNEsDKTTTATATATAPTR	0		136	156	34.3	0.00022	95569.9	tRNA ligase (EC 6.5.1.3)
P43078	PTPX_CANAL	537.261	2	LHsPLGVDR	NA		326	334	29.7	0.00027	65586.5	Probable tyrosine-protein phosphatase (EC 3.1.3.48)
P43098	FAS2_CANAL	627.798	2	AVSIEsAIEQK	0.049	AVSIEsAIEQK	956	966	54.8	1.6e-07	207591	Fatty acid synthase subunit alpha (EC 2.3.1.86) [Includes: Acyl carrier; 3-oxoacyl-[acyl-carrier-protein] reductase (EC 1.1.1.100) (Beta-ketoacyl reductase); 3-oxoacyl-[acyl-carrier-protein] synthase (EC 2.3.1.41) (Beta-ketoacyl synthase)]
P43098	FAS2_CANAL	727.335	2	StVQNEILGDLGK	0		181	193	40.1	1e-06	207591	Fatty acid synthase subunit alpha (EC 2.3.1.86) [Includes: Acyl carrier; 3-oxoacyl-[acyl-carrier-protein] reductase (EC 1.1.1.100) (Beta-ketoacyl reductase); 3-oxoacyl-[acyl-carrier-protein] synthase (EC 2.3.1.41) (Beta-ketoacyl synthase)]
P43098	FAS2_CANAL	627.797	2	AVsIESAIEQK	0.286	AVsIESAIEQK	956	966	44.3	1.3e-06	207591	Fatty acid synthase subunit alpha (EC 2.3.1.86) [Includes: Acyl carrier; 3-oxoacyl-[acyl-carrier-protein] reductase (EC 1.1.1.100) (Beta-ketoacyl reductase); 3-oxoacyl-[acyl-carrier-protein] synthase (EC 2.3.1.41) (Beta-ketoacyl synthase)]
P43098	FAS2_CANAL	667.775	2	AVsIEsAIEQK			956	966	45.4	2.2e-06	207591	Fatty acid synthase subunit alpha (EC 2.3.1.86) [Includes: Acyl carrier; 3-oxoacyl-[acyl-carrier-protein] reductase (EC 1.1.1.100) (Beta-ketoacyl reductase); 3-oxoacyl-[acyl-carrier-protein] synthase (EC 2.3.1.41) (Beta-ketoacyl synthase)]
P43098	FAS2_CANAL	573.958	3	IIEIGPsPTLAGMANR	0.007		44	59	34.9	2.8e-05	207591	Fatty acid synthase subunit alpha (EC 2.3.1.86) [Includes: Acyl carrier; 3-oxoacyl-[acyl-carrier-protein] reductase (EC 1.1.1.100) (Beta-ketoacyl reductase); 3-oxoacyl-[acyl-carrier-protein] synthase (EC 2.3.1.41) (Beta-ketoacyl synthase)]
P43098	FAS2_CANAL	745.83	2	RAVsIEsAIEQK			955	966	27.3	0.0052	207591	Fatty acid synthase subunit alpha (EC 2.3.1.86) [Includes: Acyl carrier; 3-oxoacyl-[acyl-carrier-protein] reductase (EC 1.1.1.100) (Beta-ketoacyl reductase); 3-oxoacyl-[acyl-carrier-protein] synthase (EC 2.3.1.41) (Beta-ketoacyl synthase)]
P43098	FAS2_CANAL	713.316	2	MPGGFsITtARK			238	249	18.6	0.046	207591	Fatty acid synthase subunit alpha (EC 2.3.1.86) [Includes: Acyl carrier; 3-oxoacyl-[acyl-carrier-protein] reductase (EC 1.1.1.100) (Beta-ketoacyl reductase); 3-oxoacyl-[acyl-carrier-protein] synthase (EC 2.3.1.41) (Beta-ketoacyl synthase)]
P46250	SEC14_CANAL	846.366	2	FGGMSDVsDDDLLLK	0.062	FGGMSDVsDDDLLLK	264	278	45.4	5.2e-07	34709.3	SEC14 cytosolic factor (Phosphatidylinositol/phosphatidylcholine transfer protein) (PI/PC TP)
P46273	PGK_CANAL	801.342	3	TSsATDAEGIPDNWMGLDCGPK	0.001		297	318	41.3	3.2e-06	45180.2	Phosphoglycerate kinase (EC 2.7.2.3)
P46273	PGK_CANAL	653.813	2	DLPGVVALsNKN	NA		406	417	34.8	1.9e-05	45180.2	Phosphoglycerate kinase (EC 2.7.2.3)
P46273	PGK_CANAL	448.724	2	sLLDAAVK	NA		353	360	29.4	2.2e-05	45180.2	Phosphoglycerate kinase (EC 2.7.2.3)
P46273	PGK_CANAL	612.307	3	LSHVStGGGASLELLEGK	0		388	405	33.4	0.00018	45180.2	Phosphoglycerate kinase (EC 2.7.2.3)
P46273	PGK_CANAL	666.977	3	AKtIVWNGPPGVFEFEK	NA		330	346	30.7	0.0002	45180.2	Phosphoglycerate kinase (EC 2.7.2.3)
P46273	PGK_CANAL	612.299	3	LSHVSTGGGAsLELLEGK	0.037	LSHVSTGGGAsLELLEGK	388	405	25.4	0.0013	45180.2	Phosphoglycerate kinase (EC 2.7.2.3)
P46273	PGK_CANAL	497.568	3	AHsSMVGLEVPQR	0		171	183	27.1	0.0022	45180.2	Phosphoglycerate kinase (EC 2.7.2.3)
P46273	PGK_CANAL	549.281	2	Acetyl-sLSNKLSVK	0.018		1	10	21.5	0.0034	45180.2	Phosphoglycerate kinase (EC 2.7.2.3)
P46273	PGK_CANAL	549.283	2	Acetyl-SLsNKLSVK	0.006		1	10	29.4	0.0035	45180.2	Phosphoglycerate kinase (EC 2.7.2.3)
P46273	PGK_CANAL	502.9	3	AHSsmVGLEVPQR	0		171	183	21.5	0.0072	45180.2	Phosphoglycerate kinase (EC 2.7.2.3)
P46273	PGK_CANAL	700.825	2	YSLAPVAtELEK			75	86	25.3	0.0086	45180.2	Phosphoglycerate kinase (EC 2.7.2.3)
P46587	HSP72_CANAL	776.331	2	TtPSFVAFTDTER	0		35	47	42.4	4.1e-09	70071.2	Heat shock protein SSA2
P46587	HSP72_CANAL	698.309	2	NQLESYAYsLK	0.019		538	548	45.8	1e-07	70071.2	Heat shock protein SSA2
P46587	HSP72_CANAL	657.289	2	LDAsEIEEVTK	0.11	LDAsEIEEVTK	560	570	36.3	1.6e-05	70071.2	Heat shock protein SSA2
P46587	HSP72_CANAL	776.325	2	TTPSFVAFtDTER	0.021	TTPSFVAFtDTER	35	47	34.9	0.00012	70071.2	Heat shock protein SSA2
P46587	HSP72_CANAL	484.748	2	NsTIPTKK	0.03	NsTIPTKK	415	422	28.5	0.00059	70071.2	Heat shock protein SSA2
P46587	HSP72_CANAL	420.7	2	NStIPTK	0.013		415	421	24.5	0.00073	70071.2	Heat shock protein SSA2
P46587	HSP72_CANAL	484.744	2	NStIPTKK	0.02		415	422	23.5	0.001	70071.2	Heat shock protein SSA2
P46587	HSP72_CANAL	437.176	2	MVsEAEK	NA		516	522	18.2	0.0096	70071.2	Heat shock protein SSA2
P46587	HSP72_CANAL	510.243	3	SKLDAsEIEEVTK	0.045	SKLDAsEIEEVTK	558	570	22	0.029	70071.2	Heat shock protein SSA2
P46589	ADF1_CANAL	793.372	3	ISStTPPPPSQALSNNVNTMNK	0.008		512	533	40.1	1.4e-05	68794.5	Adherence factor (Adhesion and aggregation mediating surface antigen)
P46598	HSP90_CANAL	777.342	2	sISNDWEDPLAVK	0.012		292	304	40.5	9.6e-07	80824.1	Heat shock protein 90 homolog
P46598	HSP90_CANAL	797.379	2	GVVDSEDLPLNLsR	0.185	GVVDSEDLPLNLsR	364	377	40.6	1.3e-06	80824.1	Heat shock protein 90 homolog
P46598	HSP90_CANAL	768.03	3	YQALSDPsQLESEPELFIR	0.035	YQALSDPsQLESEPELFIR	50	68	37.3	9e-06	80824.1	Heat shock protein 90 homolog
P46598	HSP90_CANAL	583.245	3	DFELEEsDEEKAAR	NA		524	537	40.7	3.2e-05	80824.1	Heat shock protein 90 homolog
P46598	HSP90_CANAL	628.933	3	NPsDITQDEYNAFYK	0.062	NPsDITQDEYNAFYK	277	291	28.3	0.00048	80824.1	Heat shock protein 90 homolog
P46598	HSP90_CANAL	706.981	3	LVDITKDFELEEsDEEK	0.197	LVDITKDFELEEsDEEK	518	534	32.4	0.00061	80824.1	Heat shock protein 90 homolog
P46598	HSP90_CANAL	624.273	2	RAPFDAFEsK	NA		323	332	20.1	0.022	80824.1	Heat shock protein 90 homolog
P46599	STE7_CANAL	515.277	2	ILHIPtQK	NA		266	273	37	5.9e-06	65207.4	Serine/threonine-protein kinase STE7 homolog (EC 2.7.12.2)
P46599	STE7_CANAL	612.29	2	qTVISSISPtK	0.012		203	213	28.3	0.0013	65207.4	Serine/threonine-protein kinase STE7 homolog (EC 2.7.12.2)
P46599	STE7_CANAL	447.693	2	qGsIAAER	NA		470	477	18.8	0.016	65207.4	Serine/threonine-protein kinase STE7 homolog (EC 2.7.12.2)
P47829	CG21_CANAL	685.312	2	qATEsSTNLVEK	0.006		151	162	37.5	3.2e-05	56777.6	G2/mitotic-specific cyclin CYB1
P47829	CG21_CANAL	693.808	2	QATESsTNLVEK	0.006		151	162	34.3	0.00015	56777.6	G2/mitotic-specific cyclin CYB1
P47831	RL28_CANAL	608.952	3	SsASAAPVIDTLAHGYGK	0.005		10	27	22.5	0.0018	6640.7	60S ribosomal protein L28 (L27A) (L29) (Fragment)
P52494	TREA_CANAL	549.232	2	TFsAFESTK	0.034	TFsAFESTK	39	47	36.8	7.6e-08	104023	Neutral trehalase (EC 3.2.1.28) (Alpha,alpha-trehalase) (Alpha,alpha-trehalose glucohydrolase)
P52494	TREA_CANAL	529.271	3	RGsLDESTFIRPK	0.048	RGSLDEsTFIRPK	211	223	35.2	3.2e-06	104023	Neutral trehalase (EC 3.2.1.28) (Alpha,alpha-trehalase) (Alpha,alpha-trehalose glucohydrolase)
P52494	TREA_CANAL	477.232	3	GsLDESTFIRPK	0.167	GsLDESTFIRPK	212	223	30.3	9.8e-06	104023	Neutral trehalase (EC 3.2.1.28) (Alpha,alpha-trehalase) (Alpha,alpha-trehalose glucohydrolase)
P52494	TREA_CANAL	656.268	3	RMsSTSSDDDPFDVAEK	0.011		8	24	38.8	1.1e-05	104023	Neutral trehalase (EC 3.2.1.28) (Alpha,alpha-trehalase) (Alpha,alpha-trehalose glucohydrolase)
P52494	TREA_CANAL	549.23	2	tFSAFESTK	0.036	TFsAFESTK	39	47	31.1	6.1e-05	104023	Neutral trehalase (EC 3.2.1.28) (Alpha,alpha-trehalase) (Alpha,alpha-trehalose glucohydrolase)
P52494	TREA_CANAL	451.549	3	VRTFsAFESTK	0.012		37	47	28.4	0.00011	104023	Neutral trehalase (EC 3.2.1.28) (Alpha,alpha-trehalase) (Alpha,alpha-trehalose glucohydrolase)
P52494	TREA_CANAL	529.268	3	RGSLDEsTFIRPK	0.056	RGsLDESTFIRPK	211	223	26.7	0.001	104023	Neutral trehalase (EC 3.2.1.28) (Alpha,alpha-trehalase) (Alpha,alpha-trehalose glucohydrolase)
P52494	TREA_CANAL	478.205	3	VRtFsAFESTK			37	47	20.6	0.0056	104023	Neutral trehalase (EC 3.2.1.28) (Alpha,alpha-trehalase) (Alpha,alpha-trehalose glucohydrolase)
P53705	INT1_CANAL	628.617	3	GQLLVSsDDHLDSFDR	0.022	GQLLVsSDDHLDSFDR	428	443	48.4	5.1e-09	187862	Integrin alpha chain-like protein (Alpha-INT1)
P53705	INT1_CANAL	586.745	2	VLEsVPGsPK			359	368	35.1	1.4e-07	187862	Integrin alpha chain-like protein (Alpha-INT1)
P53705	INT1_CANAL	638.312	2	NGsIAGIEPIPK	NA		1200	1211	37.9	2.2e-07	187862	Integrin alpha chain-like protein (Alpha-INT1)
P53705	INT1_CANAL	636.619	3	GDDDGLASAPETPRtPTK	0.005		1150	1167	43	9.8e-07	187862	Integrin alpha chain-like protein (Alpha-INT1)
P53705	INT1_CANAL	468.588	3	KNGsIAGIEPIPK	NA		1199	1211	32	9.4e-06	187862	Integrin alpha chain-like protein (Alpha-INT1)
P53705	INT1_CANAL	628.616	3	GQLLVSSDDHLDsFDR	0		428	443	35.6	2.7e-05	187862	Integrin alpha chain-like protein (Alpha-INT1)
P53705	INT1_CANAL	679.313	3	GDDDGLASAPETPRtPTKK	0.002		1150	1168	38.8	8.3e-05	187862	Integrin alpha chain-like protein (Alpha-INT1)
P53705	INT1_CANAL	480.721	2	SFtPLSTK	0.009		848	855	25.6	0.00011	187862	Integrin alpha chain-like protein (Alpha-INT1)
P53705	INT1_CANAL	480.716	2	sFTPLSTK	0.089	sFTPLSTK	848	855	29.9	0.00013	187862	Integrin alpha chain-like protein (Alpha-INT1)
P53705	INT1_CANAL	626.957	3	VNENHAPTYINTsPNK	0		140	155	30.8	0.00019	187862	Integrin alpha chain-like protein (Alpha-INT1)
P53705	INT1_CANAL	399.187	2	LSsASPR	0.004		1178	1184	27.4	0.00021	187862	Integrin alpha chain-like protein (Alpha-INT1)
P53705	INT1_CANAL	462.567	3	DLsRDKLETTK	0.168	DLsRDKLETTK	395	405	26.9	0.00045	187862	Integrin alpha chain-like protein (Alpha-INT1)
P53705	INT1_CANAL	775.416	4	HSHLQLQPQSsSASIFNSPTKPLNFPR	0		14	40	28.9	0.00066	187862	Integrin alpha chain-like protein (Alpha-INT1)
P53705	INT1_CANAL	633.974	3	SDILNDVSQTsDIIGDK	0.021	SDILNDVSQTsDIIGDK	619	635	27.9	0.001	187862	Integrin alpha chain-like protein (Alpha-INT1)
P53705	INT1_CANAL	533.597	3	NFsDVLLLDHAFK	NA		1593	1605	30	0.0011	187862	Integrin alpha chain-like protein (Alpha-INT1)
P53705	INT1_CANAL	416.88	3	KPPTALLsADR	0.115	KPPTALLsADR	1046	1056	23	0.0013	187862	Integrin alpha chain-like protein (Alpha-INT1)
P53705	INT1_CANAL	650.798	2	VLEsVPGsPKK			359	369	22.5	0.0065	187862	Integrin alpha chain-like protein (Alpha-INT1)
P53705	INT1_CANAL	663.267	3	GDDDGLAsAPETPRtPTK			1150	1167	24.1	0.0086	187862	Integrin alpha chain-like protein (Alpha-INT1)
P53705	INT1_CANAL	477.573	3	LSSAsPRKsPIK			1178	1189	22.4	0.033	187862	Integrin alpha chain-like protein (Alpha-INT1)
P53707	CSP37_CANAL	484.22	3	EKsIFGNWFDK	NA		144	154	24.9	0.0027	37072.3	37 kDa cell surface protein
P78590	EF1B_CANAL	584.927	3	VEsIKsLNEFLADK			9	22	38.3	3.2e-06	23479.2	Elongation factor 1-beta (EF-1-beta)
P78590	EF1B_CANAL	558.749	2	sLNEFLADK	NA		14	22	36.2	1e-05	23479.2	Elongation factor 1-beta (EF-1-beta)
P78590	EF1B_CANAL	748.328	2	Acetyl-SFSDFSKVEsIK	0.009		1	13	31	1.6e-05	23479.2	Elongation factor 1-beta (EF-1-beta)
P78590	EF1B_CANAL	558.277	3	VESIKsLNEFLADK	0.342	VESIKsLNEFLADK	9	22	37.9	4.5e-05	23479.2	Elongation factor 1-beta (EF-1-beta)
P78590	EF1B_CANAL	929.321	4	APAASGsAAAAAEEEDDEDVDLFGsDDEVDEEAEK			70	104	33.5	0.0004	23479.2	Elongation factor 1-beta (EF-1-beta)
P78590	EF1B_CANAL	748.332	2	Acetyl-sFSDFSKVESIK	0.012		1	13	24.2	0.01	23479.2	Elongation factor 1-beta (EF-1-beta)
P79023	AROG_CANAL	687.281	2	tPVPTEYDDTR	0.621	tPVPTEYDDTR	4	14	40.8	6.2e-08	40291.3	Phospho-2-dehydro-3-deoxyheptonate aldolase, tyrosine-inhibited (EC 2.5.1.54) (Phospho-2-keto-3-deoxyheptonate aldolase) (DAHP synthetase) (3-deoxy-D-arabino-heptulosonate 7-phosphate synthase)
P79023	AROG_CANAL	815.846	2	Acetyl-SKtPVPTEYDDTR	0.007		1	14	36.2	6.9e-06	40291.3	Phospho-2-dehydro-3-deoxyheptonate aldolase, tyrosine-inhibited (EC 2.5.1.54) (Phospho-2-keto-3-deoxyheptonate aldolase) (DAHP synthetase) (3-deoxy-D-arabino-heptulosonate 7-phosphate synthase)
P79023	AROG_CANAL	815.846	2	Acetyl-sKTPVPTEYDDTR	0.001		1	14	37.9	9.4e-06	40291.3	Phospho-2-dehydro-3-deoxyheptonate aldolase, tyrosine-inhibited (EC 2.5.1.54) (Phospho-2-keto-3-deoxyheptonate aldolase) (DAHP synthetase) (3-deoxy-D-arabino-heptulosonate 7-phosphate synthase)
P79023	AROG_CANAL	530.238	3	SKTPVPtEYDDTR	0.003		1	14	31.1	9.3e-05	40291.3	Phospho-2-dehydro-3-deoxyheptonate aldolase, tyrosine-inhibited (EC 2.5.1.54) (Phospho-2-keto-3-deoxyheptonate aldolase) (DAHP synthetase) (3-deoxy-D-arabino-heptulosonate 7-phosphate synthase)
P79023	AROG_CANAL	855.828	2	Acetyl-sKtPVPTEYDDTR			1	14	27.7	0.00013	40291.3	Phospho-2-dehydro-3-deoxyheptonate aldolase, tyrosine-inhibited (EC 2.5.1.54) (Phospho-2-keto-3-deoxyheptonate aldolase) (DAHP synthetase) (3-deoxy-D-arabino-heptulosonate 7-phosphate synthase)
P83777	IPYR_CANAL	411.658	2	Acetyl-SsYSTR	0.014		1	7	19.7	0.00078	32128.5	Inorganic pyrophosphatase (EC 3.6.1.1) (Pyrophosphate phospho-hydrolase) (PPase)
P84285	ARE2_CANAL	746.022	3	sNNQDSPVDLNGVIVDVSKR	0.065	sNNQDSPVDLNGVIVDVSKR	84	103	37.6	2.6e-06	71347.2	Sterol O-acyltransferase 2 (EC 2.3.1.26) (Sterol-ester synthase) (ASAT)
P84285	ARE2_CANAL	773.697	3	qKsNNQDSPVDLNGVIVDVSK	0.031	qKsNNQDSPVDLNGVIVDVSK	82	102	40	5.8e-06	71347.2	Sterol O-acyltransferase 2 (EC 2.3.1.26) (Sterol-ester synthase) (ASAT)
P84285	ARE2_CANAL	743.816	2	TNtSDQLNAISDK	0.011		4	16	44.3	1e-05	71347.2	Sterol O-acyltransferase 2 (EC 2.3.1.26) (Sterol-ester synthase) (ASAT)
P84285	ARE2_CANAL	693.994	3	sNNQDSPVDLNGVIVDVSK	0.028	sNNQDSPVDLNGVIVDVSK	84	102	33.9	0.00021	71347.2	Sterol O-acyltransferase 2 (EC 2.3.1.26) (Sterol-ester synthase) (ASAT)
P84285	ARE2_CANAL	567.263	3	GRTNtSDQLNAISDK	0		1	16	40.3	0.00058	71347.2	Sterol O-acyltransferase 2 (EC 2.3.1.26) (Sterol-ester synthase) (ASAT)
P84285	ARE2_CANAL	779.366	3	QKsNNQDSPVDLNGVIVDVSK	0.209	QKsNNQDSPVDLNGVIVDVSK	82	102	27	0.003	71347.2	Sterol O-acyltransferase 2 (EC 2.3.1.26) (Sterol-ester synthase) (ASAT)
P84285	ARE2_CANAL	482.707	2	FNDItFK	NA		129	135	34.2	0.0042	71347.2	Sterol O-acyltransferase 2 (EC 2.3.1.26) (Sterol-ester synthase) (ASAT)
P87023	KRE6_CANAL	700.774	2	DVSsVGGGGGSGDNR	0.01		136	150	43.7	1.1e-07	82457.6	Beta-glucan synthesis-associated protein KRE6
P87023	KRE6_CANAL	580.56	3	NNTNDDFNsDHNPR	0.068	NNTNDDFNsDHNPR	21	34	39.9	1.2e-07	82457.6	Beta-glucan synthesis-associated protein KRE6
P87023	KRE6_CANAL	580.558	3	NNtNDDFNSDHNPR	0.184	NNtNDDFNSDHNPR	21	34	35.5	1.3e-06	82457.6	Beta-glucan synthesis-associated protein KRE6
P87023	KRE6_CANAL	597.938	3	DLTSNNPHFHISsSR	0.001		6	20	38.7	6e-06	82457.6	Beta-glucan synthesis-associated protein KRE6
P87023	KRE6_CANAL	683.979	3	VVsSTSLVSFNNPSNMMR	0		170	187	31.2	7.1e-05	82457.6	Beta-glucan synthesis-associated protein KRE6
P87023	KRE6_CANAL	725.983	3	LNPTSPAEFDRYPSMAGsR	0.015		151	169	26.2	0.00016	82457.6	Beta-glucan synthesis-associated protein KRE6
P87023	KRE6_CANAL	663.779	2	LNPTsPAEFDR	0.002		151	161	29.8	0.00043	82457.6	Beta-glucan synthesis-associated protein KRE6
P87023	KRE6_CANAL	597.938	3	DLTsNNPHFHISSSR	0		6	20	25	0.033	82457.6	Beta-glucan synthesis-associated protein KRE6
P87065	P87065_CANAL	853.378	3	SPPVDAPYPVYDAPsPPPVFAsK			114	136	45.3	1.7e-09	75898.3	Chitin synthase regulatory factor
P87065	P87065_CANAL	826.716	3	SPPVDAPYPVYDAPsPPPVFASK	0.065	SPPVDAPYPVYDAPsPPPVFASK	114	136	36.2	7.4e-05	75898.3	Chitin synthase regulatory factor
P87065	P87065_CANAL	639.629	3	SKsIDFNNIELEGNEK	0.001		336	351	39.7	0.0004	75898.3	Chitin synthase regulatory factor
P87066	TBA_CANAL	920.721	3	ATHEANsVSEITQSCFEPGNQmVK	0.033	ATHEANsVSEITQSCFEPGNQmVK	282	305	24.8	0.003	49968.6	Tubulin alpha chain
P87078	TOP2_CANAL	554.922	3	ERsPEPEPQDGTIK	0.659	ERsPEPEPQDGTIK	310	323	24.9	0.0018	165388	DNA topoisomerase 2 (EC 5.99.1.3) (DNA topoisomerase II)
P87206	IF4A_CANAL	573.284	2	sKVEFLTNK	0.244	sKVEFLTNK	273	281	34.1	6.5e-08	44599.6	ATP-dependent RNA helicase eIF4A (EC 3.6.1.-) (Eukaryotic initiation factor 4A) (eIF-4A) (Translation Initiation factor 1)
P87206	IF4A_CANAL	625.312	2	SGVQIVVGtPGR	0.32	SGVQIVVGtPGR	140	151	35.2	3.3e-05	44599.6	ATP-dependent RNA helicase eIF4A (EC 3.6.1.-) (Eukaryotic initiation factor 4A) (eIF-4A) (Translation Initiation factor 1)
P87206	IF4A_CANAL	870.728	3	ASEGItEIDSGLIETNYDNVVYK	0		1	24	28.1	0.018	44599.6	ATP-dependent RNA helicase eIF4A (EC 3.6.1.-) (Eukaryotic initiation factor 4A) (eIF-4A) (Translation Initiation factor 1)
P87206	IF4A_CANAL	897.389	3	AsEGITEIDsGLIETNYDNVVYK			1	24	22.3	0.038	44599.6	ATP-dependent RNA helicase eIF4A (EC 3.6.1.-) (Eukaryotic initiation factor 4A) (eIF-4A) (Translation Initiation factor 1)
Q00310	KRE2_CANAL	455.217	2	sNARLIR	NA		6	12	19.1	0.016	50004.5	Glycolipid 2-alpha-mannosyltransferase (EC 2.4.1.131) (Alpha-1,2-mannosyltransferase)
Q00312	RBF1_CANAL	841.39	2	NQsDLNIPTNSASLK	0.459	NQsDLNIPTNSASLK	6	20	34.2	4.3e-05	59441.4	Transcription factor RBF1 (RPG-box-binding factor) (Repressor-activator protein 1)
Q00313	TOP1_CANAL	668.619	3	VEsDYEEDEDEVPLKK	0.038	VEsDYEEDEDEVPLKK	46	61	32.1	6.3e-05	90485	DNA topoisomerase 1 (EC 5.99.1.2) (DNA topoisomerase I)
Q00313	TOP1_CANAL	677.95	3	RVEsDYEEDEDEVPLK	0		45	60	39.6	8.4e-05	90485	DNA topoisomerase 1 (EC 5.99.1.2) (DNA topoisomerase I)
Q0EDB2	Q0EDB2_CANAL	469.724	2	PIsPVmAK	NA		1	9	33.1	7.9e-09	80104	Transcription factor Tcc1p
Q0EDB2	Q0EDB2_CANAL	461.735	2	PIsPVMAK	NA		1	9	35.5	1.1e-07	80104	Transcription factor Tcc1p
Q2TU56	Q2TU56_CANAL	735.29	3	NNEDIEDQQQsNPYSSQK	0.04	NNEDIEDQQQsNPYSSQK	130	147	28.3	0.00042	23277.6	Rho3p
Q3MNT0	SPT6_CANAL	868.678	3	qIEDDEDEIEsQDHQGEQQLR	NA		128	148	50.6	9.2e-09	162068	Transcription elongation factor SPT6 (Chromatin elongation factor SPT6)
Q3MNT0	SPT6_CANAL	921.339	3	IMDEFDGFIEEDDFsDEDEQTR	0.192	IMDEFDGFIEEDDFsDEDEQTR	165	186	47.5	5.4e-08	162068	Transcription elongation factor SPT6 (Chromatin elongation factor SPT6)
Q3MNT0	SPT6_CANAL	926.673	3	ImDEFDGFIEEDDFsDEDEQTR	0.265	ImDEFDGFIEEDDFsDEDEQTR	165	186	45.5	2.3e-07	162068	Transcription elongation factor SPT6 (Chromatin elongation factor SPT6)
Q3MNT0	SPT6_CANAL	702.953	3	IHATDDPWEsPDDMIER	0.278	IHATDDPWEsPDDMIER	495	511	41.2	3.4e-07	162068	Transcription elongation factor SPT6 (Chromatin elongation factor SPT6)
Q3MNT0	SPT6_CANAL	644.261	3	DIFsDDEEVEEEAAPR	NA		149	164	43.6	2e-06	162068	Transcription elongation factor SPT6 (Chromatin elongation factor SPT6)
Q3MNT0	SPT6_CANAL	874.352	3	QIEDDEDEIEsQDHQGEQQLR	NA		128	148	38	5.1e-06	162068	Transcription elongation factor SPT6 (Chromatin elongation factor SPT6)
Q3MP48	Q3MP48_CANAL	555.272	3	DSDLIsLLNHVTTR	0.001		1627	1640	36.6	8.4e-05	189386	Hypothetical protein CaJ7.0349
Q3MP48	Q3MP48_CANAL	523.236	2	SSsIISDEK	0.037	SSsIISDEK	133	141	37.4	0.00023	189386	Hypothetical protein CaJ7.0349
Q3MP48	Q3MP48_CANAL	428.207	2	SNsLLNK	0.097	SNsLLNK	106	112	26.8	0.0011	189386	Hypothetical protein CaJ7.0349
Q3MP48	Q3MP48_CANAL	448.243	2	KAsPTAIK	0.045	KAsPTAIK	234	241	28.1	0.0013	189386	Hypothetical protein CaJ7.0349
Q3MP48	Q3MP48_CANAL	699.979	3	FSSFDSNLSTSSSsPPKDK	0.008		159	177	22.9	0.014	189386	Hypothetical protein CaJ7.0349
Q3MP48	Q3MP48_CANAL	699.985	3	FSsFDSNLSTSSSSPPKDK	0.004		159	177	22.2	0.028	189386	Hypothetical protein CaJ7.0349
Q3MPF7	Q3MPF7_CANAL	555.794	2	KVTsPVTNGK	0.013		553	562	42.1	2.2e-08	70692.6	Hypothetical protein CaJ7.0212
Q3MPF7	Q3MPF7_CANAL	607.287	2	TSGQVSsLLNK	0.014		483	493	43.1	5.9e-07	70692.6	Hypothetical protein CaJ7.0212
Q3MPF7	Q3MPF7_CANAL	390.213	3	SLsPSKVDKK	0.027	SLSPsKVDKK	524	533	27.7	0.00011	70692.6	Hypothetical protein CaJ7.0212
Q3MPF7	Q3MPF7_CANAL	489.239	3	EGtPGKNVDDLLK	NA		470	482	25.1	0.0025	70692.6	Hypothetical protein CaJ7.0212
Q3MPF7	Q3MPF7_CANAL	390.211	3	SLSPsKVDKK	0.014		524	533	26.3	0.0057	70692.6	Hypothetical protein CaJ7.0212
Q3MPF7	Q3MPF7_CANAL	390.215	3	sLSPSKVDKK	0.013		524	533	20.2	0.02	70692.6	Hypothetical protein CaJ7.0212
Q3MPJ2	Q3MPJ2_CANAL	922.372	2	IEQTEDDsDGLGLESR	0.05	IEQTEDDsDGLGLESR	79	94	37.3	0.00023	52757.6	Hypothetical protein CaJ7.0163
Q3MPM6	Q3MPM6_CANAL	709.343	2	APISPVSLQsPNK	0.009		363	375	42.8	4.7e-08	120866	Hypothetical protein CaJ7.0126
Q3MPM6	Q3MPM6_CANAL	709.351	2	APIsPVSLQSPNK	0.001		363	375	33.3	2.8e-07	120866	Hypothetical protein CaJ7.0126
Q3MPM6	Q3MPM6_CANAL	638.771	2	ANsLNSGTNYR	0.441	ANsLNSGTNYR	210	220	42.1	8.1e-07	120866	Hypothetical protein CaJ7.0126
Q3MPM6	Q3MPM6_CANAL	591.986	3	NSQVPIIVEKPASPsK	0		310	325	34.4	1.1e-06	120866	Hypothetical protein CaJ7.0126
Q3MPM6	Q3MPM6_CANAL	647.273	3	SPAHIDsDPNVENSYSK	0.079	SPAHIDsDPNVENSYSK	929	945	45.2	1.3e-06	120866	Hypothetical protein CaJ7.0126
Q3MPM6	Q3MPM6_CANAL	589.609	3	RTsTASAYSSGSGSIVR	0.004		652	668	36.7	3.6e-06	120866	Hypothetical protein CaJ7.0126
Q3MPM6	Q3MPM6_CANAL	722.949	3	FsDGHEMEPSEGMYLTEK	0.175	FsDGHEMEPSEGMYLTEK	806	823	32.7	9.4e-05	120866	Hypothetical protein CaJ7.0126
Q3MPM6	Q3MPM6_CANAL	536.263	3	SDsLNSQGQPKPLR	0.016		292	305	30.8	0.00015	120866	Hypothetical protein CaJ7.0126
Q3MPM6	Q3MPM6_CANAL	539.741	2	YNsLTSASR	0.022	YNsLTSASR	123	131	34.5	0.00023	120866	Hypothetical protein CaJ7.0126
Q3MPM6	Q3MPM6_CANAL	525.75	2	IGGsPPSSIR	0.136	IGGsPPSSIR	389	398	25.4	0.0012	120866	Hypothetical protein CaJ7.0126
Q3MPM6	Q3MPM6_CANAL	507.564	3	KSSFNsETENVAK	0.004		500	512	27.9	0.0021	120866	Hypothetical protein CaJ7.0126
Q3MPM6	Q3MPM6_CANAL	556.717	2	sESYQGFSK	0.01		11	19	23.1	0.0041	120866	Hypothetical protein CaJ7.0126
Q3MPM6	Q3MPM6_CANAL	557.919	3	sGsLTRAANINLsK			221	234	18.6	0.045	120866	Hypothetical protein CaJ7.0126
Q3MPM6	Q3MPM6_CANAL	680.301	3	TStASAYSSGSGSIVRGTNR	0.036	TStASAYSSGSGSIVRGTNR	653	672	22.2	0.047	120866	Hypothetical protein CaJ7.0126
Q3MPN9	Q3MPN9_CANAL	630.946	3	sVVDDPDRFEEEFVK	NA		66	80	32.7	5.4e-07	102630	Hypothetical protein CaJ7.0111
Q3MPN9	Q3MPN9_CANAL	784.705	3	TNtGFTPNQIIALDAAIPESAK	0.001		17	38	34.8	1.4e-05	102630	Hypothetical protein CaJ7.0111
Q3MPN9	Q3MPN9_CANAL	680.824	2	VVFIPDYNVsK	0.009		701	711	36	0.00017	102630	Hypothetical protein CaJ7.0111
Q3MPN9	Q3MPN9_CANAL	636.291	3	AEsITSVLYPNDNFEK	0.006		325	340	36.5	0.0011	102630	Hypothetical protein CaJ7.0111
Q3MPN9	Q3MPN9_CANAL	636.283	3	AESItSVLYPNDNFEK	0		325	340	31.5	0.0036	102630	Hypothetical protein CaJ7.0111
Q3MPP4	Q3MPP4_CANAL	922.722	3	RDsFSDTTTTSTASSNTMTTMISDK	0.002		290	314	29.8	0.0059	66608.7	Hypothetical protein CaJ7.0105
Q3MPP5	Q3MPP5_CANAL	781.383	3	NsNSPPLAPSQQIQQQQGIAR	0.004		25	45	42.5	5.7e-07	32181.6	Hypothetical protein CaJ7.0104
Q3MPR0	Q3MPR0_CANAL	679.308	2	sLNTMTLVNER	0.011		460	470	31.6	3e-05	66496	Hypothetical protein CaJ7.0085
Q3MPX1	Q3MPX1_CANAL	725.775	2	SNsLNPsETSVR			67	78	38.3	2.1e-07	56804.2	Hypothetical protein CaJ7.0013
Q3MPX1	Q3MPX1_CANAL	682.367	2	LLPTTVSAsPAVK	0.004		390	402	43.7	1.1e-06	56804.2	Hypothetical protein CaJ7.0013
Q3MPX1	Q3MPX1_CANAL	685.794	2	SNsLNPSETSVR	0.012		67	78	38.1	1.4e-06	56804.2	Hypothetical protein CaJ7.0013
Q3MPX1	Q3MPX1_CANAL	812.993	3	DESDVTSTstTPLNEESHLSK			409	429	34.4	0.00014	56804.2	Hypothetical protein CaJ7.0013
Q3MPX1	Q3MPX1_CANAL	455.212	2	LNDGsPVK	NA		482	489	34.1	0.00093	56804.2	Hypothetical protein CaJ7.0013
Q3MPX1	Q3MPX1_CANAL	732.316	3	MVLSNEsLPHVSDNENDSK	0.005		1	19	22	0.0057	56804.2	Hypothetical protein CaJ7.0013
Q3MPX1	Q3MPX1_CANAL	732.316	3	MVLSNESLPHVsDNENDSK	0.011		1	19	20.9	0.013	56804.2	Hypothetical protein CaJ7.0013
Q59JS3	Q59JS3_CANAL	794.021	3	tKSTEDGSESFADALNSIVNSK	0.005		106	127	35.8	1.4e-05	28566.9	Hypothetical protein
Q59JS9	Q59JS9_CANAL	631.659	3	KQsNVITSPNNELIQK	0.191	KQsNVITSPNNELIQK	106	121	28.4	0.00063	37469	CTA2 subfamily 1 protein 7
Q59JV2	Q59JV2_CANAL	791.326	3	NASGPGGAALTTASsHYDADADSR	0		324	347	26.3	0.00068	47707.3	Fungal conserved protein Cfp4
Q59JW1	Q59JW1_CANAL	752.315	2	WDPLYsWTLSR	0.022	WDPLYsWTLSR	124	134	29.4	0.0026	23052.4	Potential phosphatidylinositol kinase
Q59JX5	Q59JX5_CANAL	537.579	3	FASQSEHGGTAsPVR	0.012		710	724	48.6	5.7e-09	87467.7	Potential glycerol-3-phosphate acyltransferase
Q59JX5	Q59JX5_CANAL	602.939	3	NPDLQLDPQsHYGSR	0.014		675	689	33.1	9.3e-06	87467.7	Potential glycerol-3-phosphate acyltransferase
Q59JX5	Q59JX5_CANAL	602.924	3	NPDLQLDPQSHYGsR	0.002		675	689	28.4	0.00016	87467.7	Potential glycerol-3-phosphate acyltransferase
Q59JX5	Q59JX5_CANAL	752.322	3	VNsNLNSGANSSVSIYDDYR	0.006		690	709	22.1	0.0097	87467.7	Potential glycerol-3-phosphate acyltransferase
Q59JX7	Q59JX7_CANAL	635.962	3	sQQYNSPHQPLLGNSR	0.088	sQQYNSPHQPLLGNSR	3	18	35	4.3e-08	12183.4	Hypothetical protein (Fragment)
Q59JX7	Q59JX7_CANAL	635.96	3	SQQYNsPHQPLLGNSR	0.003		3	18	31.8	3.6e-05	12183.4	Hypothetical protein (Fragment)
Q59JX7	Q59JX7_CANAL	586.937	3	LGYQsIQQQQQDSR	0.006		33	46	28.8	0.0054	12183.4	Hypothetical protein (Fragment)
Q59JX7	Q59JX7_CANAL	639.75	2	sRDNsLSSPR			19	28	21.1	0.0097	12183.4	Hypothetical protein (Fragment)
Q59JY0	Q59JY0_CANAL	470.194	3	SGGGGGNGVsISsGR			111	125	24.2	0.01	23994.7	Potential U4/U6 snRNP-associated protein Prp31p
Q59JZ8	Q59JZ8_CANAL	788.303	2	DITNFDsDTENPK	0.018		576	588	36.3	2.3e-05	99384.6	Probable peroxisomal hydratase-dehydrogenase-epimerase
Q59K34	Q59K34_CANAL	504.723	2	Acetyl-SsFGTLFK	0.032	MsSFGTLFK	1	9	36.8	0.00013	40868.5	Hypothetical protein ARO2
Q59K48	Q59K48_CANAL	412.207	2	ILGtPSR	0.118	ILGtPSR	240	246	27.8	5e-05	47275.6	Likely protein kinase
Q59K48	Q59K48_CANAL	610.28	3	ILNPSEPNVSyICSR	0.049	ILNPSEPNVSyICSR	174	188	28.5	0.00033	47275.6	Likely protein kinase
Q59K84	Q59K84_CANAL	657.65	3	LLQQGFsQDDVTDLRR	0.014		129	144	23	0.0063	31526.7	Hypothetical protein
Q59K97	Q59K97_CANAL	660.977	3	SRNPtPPSTINDNVSSSK	0.045	SRNPtPPSTINDNVSSSK	37	54	32.8	0.00021	43815.9	Potential transmembrane protein
Q59KA9	Q59KA9_CANAL	520.902	3	HSNsVSSTSVFSNK	0.015		517	530	36.1	0.00012	139239	Hypothetical protein MSB1 (Fragment)
Q59KA9	Q59KA9_CANAL	563.589	3	KHSNSVsSTSVFSNK	0.01		516	530	27.4	0.00013	139239	Hypothetical protein MSB1 (Fragment)
Q59KC0	Q59KC0_CANAL	909.925	2	qAsIVALNNNNTIDIR	0.006		250	265	42.2	2.1e-06	42498.2	Hypothetical protein (Fragment)
Q59KC0	Q59KC0_CANAL	612.635	3	QAsIVALNNNNTIDIR	0.15	QAsIVALNNNNTIDIR	250	265	27.7	0.00087	42498.2	Hypothetical protein (Fragment)
Q59KC2	Q59KC2_CANAL	802.715	3	LFDNSVGSNsNSPILLPPNANR	0.001		239	260	28.8	0.00023	38485.1	Hypothetical protein
Q59KC2	Q59KC2_CANAL	829.38	3	LFDNSVGsNSNsPILLPPNANR			239	260	23	0.0037	38485.1	Hypothetical protein
Q59KE5	Q59KE5_CANAL	803.351	2	ANtISSDQTLFSNK	0.063	ANtISSDQTLFSNK	546	559	38.8	4.6e-07	99349.9	Hypothetical protein MIH1
Q59KE6	Q59KE6_CANAL	847.851	2	SATVGNTENSFGSTsR	0.035	SATVGNTENSFGSTsR	677	692	43.4	3.5e-07	91054.5	Likely protein kinase
Q59KE6	Q59KE6_CANAL	601.946	3	RNsNTSQHFGYGLSR	0.01		693	707	28.5	0.00043	91054.5	Likely protein kinase
Q59KE6	Q59KE6_CANAL	577.781	2	sELQFPLIK	NA		299	307	20	0.029	91054.5	Likely protein kinase
Q59KE6	Q59KE6_CANAL	549.907	3	NsNTSQHFGYGLSR	0.034	NsNTSQHFGYGLSR	694	707	20.5	0.029	91054.5	Likely protein kinase
Q59KF3	SPB1_CANAL	530.323	3	LIKPItKEAAIAIK	NA		715	728	30.6	2.7e-06	96820.8	AdoMet-dependent rRNA methyltransferase SPB1 (EC 2.1.1.-) (2'-O-ribose RNA methyltransferase) (S-adenosyl-L-methionine-dependent methyltransferase)
Q59KF3	SPB1_CANAL	446.775	2	LIKPItK	NA		715	721	23.6	0.0022	96820.8	AdoMet-dependent rRNA methyltransferase SPB1 (EC 2.1.1.-) (2'-O-ribose RNA methyltransferase) (S-adenosyl-L-methionine-dependent methyltransferase)
Q59KG2	Q59KG2_CANAL	918.377	2	SSsITSIESADEPGTmK	0.007		33	49	36.5	7.5e-06	23654	Hypothetical protein
Q59KG2	Q59KG2_CANAL	950.362	2	SSsITSIEsADEPGTMK			33	49	36.5	1.1e-05	23654	Hypothetical protein
Q59KG2	Q59KG2_CANAL	950.362	2	SSSITsIEsADEPGTMK			33	49	43.3	1.2e-05	23654	Hypothetical protein
Q59KG2	Q59KG2_CANAL	950.36	2	SSsITsIESADEPGTMK			33	49	35.3	1.3e-05	23654	Hypothetical protein
Q59KG2	Q59KG2_CANAL	958.361	2	SSSItSIEsADEPGTmK			33	49	29.1	0.0002	23654	Hypothetical protein
Q59KG2	Q59KG2_CANAL	607.261	3	SSsITSIESADEPGTMK	0.004		33	49	31.3	0.00025	23654	Hypothetical protein
Q59KG2	Q59KG2_CANAL	692.975	3	TRSsSITSIESADEPGTMK	0.001		31	49	35.4	0.00026	23654	Hypothetical protein
Q59KG2	Q59KG2_CANAL	698.306	3	tRSSSITSIESADEPGTmK	0.005		31	49	27.6	0.00044	23654	Hypothetical protein
Q59KG2	Q59KG2_CANAL	918.382	2	SSSITSIEsADEPGTmK	0.007		33	49	32.7	0.0018	23654	Hypothetical protein
Q59KG2	Q59KG2_CANAL	910.388	2	SSSITSIEsADEPGTMK	0.001		33	49	28.5	0.0047	23654	Hypothetical protein
Q59KG6	Q59KG6_CANAL	625.774	2	TAsFFIDIEK	0.059	TAsFFIDIEK	8	17	40.5	3.2e-06	37607.2	Hypothetical protein
Q59KI3	Q59KI3_CANAL	848.827	2	qEsNDIDNNTNEIK	0.146	qEsNDIDNNTNEIK	40	53	43.6	1.1e-07	15828.1	Hypothetical protein
Q59KI3	Q59KI3_CANAL	580.293	2	IKsVYDLNK	0.086	IKsVYDLNK	31	39	41	3.1e-05	15828.1	Hypothetical protein
Q59KI3	Q59KI3_CANAL	459.7	2	sVYDLNK	0.593	sVYDLNK	33	39	23.9	0.0014	15828.1	Hypothetical protein
Q59KI4	INO80_CANAL	564.23	2	NNKISEtNK	0.01		206	214	24.6	0.0013	158808	Putative DNA helicase INO80 (EC 3.6.1.-)
Q59KI4	INO80_CANAL	529.627	3	qSSKPStPILIKPK	0		304	317	19.5	0.027	158808	Putative DNA helicase INO80 (EC 3.6.1.-)
Q59KJ3	Q59KJ3_CANAL	679.998	3	KLNtNTSFSSNLTNSTTK	0		45	62	34.8	1.6e-05	56922.9	Orf in C. albicans Major Repeat Sequence, RB2 region
Q59KJ3	Q59KJ3_CANAL	721.836	2	MLVPADsFIQNK	NA		269	280	36.9	1.9e-05	56922.9	Orf in C. albicans Major Repeat Sequence, RB2 region
Q59KJ3	Q59KJ3_CANAL	436.7	2	SSVsSLGR	0.013		369	376	27.8	0.0023	56922.9	Orf in C. albicans Major Repeat Sequence, RB2 region
Q59KJ4	Q59KJ4_CANAL	671.661	3	SLtISNPQQSSTISSNLR	0.005		27	44	29.9	0.00046	54320.1	Possible Bem1-like protein (Fragment)
Q59KJ4	Q59KJ4_CANAL	436.702	2	SAsVSVSR	0.037	SAsVSVSR	413	420	24.3	0.00048	54320.1	Possible Bem1-like protein (Fragment)
Q59KL5	Q59KL5_CANAL	508.731	2	RGtVSSSSR	0.089	RGtVSSSSR	138	146	21.7	0.00039	34976.2	Hypothetical protein
Q59KL5	Q59KL5_CANAL	533.778	2	LGSTRLsPR	0.001		225	233	21.4	0.004	34976.2	Hypothetical protein
Q59KL5	Q59KL5_CANAL	525.233	3	KTDtIDDWWTGR	0.017		297	308	26.3	0.0072	34976.2	Hypothetical protein
Q59KL8	Q59KL8_CANAL	735.856	2	TLSsVPTSPSSLSK	0.008		1287	1300	37.7	8.3e-07	183679	Hypothetical protein RLR1
Q59KL8	Q59KL8_CANAL	637.281	3	VLNSEsLDGHEATSNEK	0.011		1328	1344	35.6	8.9e-06	183679	Hypothetical protein RLR1
Q59KL8	Q59KL8_CANAL	496.701	2	SIsSEDFK	0.025	SIsSEDFK	1416	1423	26.7	9.1e-06	183679	Hypothetical protein RLR1
Q59KL8	Q59KL8_CANAL	735.84	2	TLSSVPTsPSSLSK	0.019		1287	1300	33.3	0.00037	183679	Hypothetical protein RLR1
Q59KL8	Q59KL8_CANAL	534.574	3	SIsSEDFKGPTEPK	0.011		1416	1429	27.5	0.0005	183679	Hypothetical protein RLR1
Q59KL8	Q59KL8_CANAL	775.824	2	TLSsVPTSPSSLsK			1287	1300	21.3	0.0011	183679	Hypothetical protein RLR1
Q59KL8	Q59KL8_CANAL	577.275	3	KSIsSEDFKGPTEPK	0		1415	1429	27.1	0.0099	183679	Hypothetical protein RLR1
Q59KM5	Q59KM5_CANAL	684.982	3	DLDQETAItDVAFtPTR			773	789	26.9	0.032	164978	Hypothetical protein YRF1
Q59KM6	Q59KM6_CANAL	537.93	3	ELDGsSTDIELKPK	0		49	62	37.5	7.1e-05	23452.1	Hypothetical protein
Q59KM7	Q59KM7_CANAL	848.336	2	IEtDGDYVTFGNER	0.031	IEtDGDYVTFGNER	47	60	40.5	1.2e-07	30948.5	Possible transmembrane sensor/transporter
Q59KM8	Q59KM8_CANAL	647.302	2	ENItPLNSPTK	0.227	ENItPLNSPTK	77	87	34.3	1.5e-05	82373.8	Likely protein kinase
Q59KM8	Q59KM8_CANAL	434.883	3	SILHNsPQQAK	0.206	SILHNsPQQAK	88	98	34.2	7.6e-05	82373.8	Likely protein kinase
Q59KM8	Q59KM8_CANAL	687.281	2	ENItPLNsPTK			77	87	17.6	0.036	82373.8	Likely protein kinase
Q59KP3	Q59KP3_CANAL	588.963	3	TMsKDQHIVINVSGR	0.004		656	670	32	5.4e-06	76073.9	Likely tryptophan synthetase alpha chain
Q59KP6	Q59KP6_CANAL	945.899	2	WEDFITDELETTPsK	0.004		434	448	29.6	0.00043	239310	Hypothetical protein (Fragment)
Q59KP6	Q59KP6_CANAL	714.307	2	SKAsDLGYtVVK			792	803	27.3	0.0027	239310	Hypothetical protein (Fragment)
Q59KP6	Q59KP6_CANAL	604.6	3	DIEsTPSREFIEtK			1767	1780	18.7	0.02	239310	Hypothetical protein (Fragment)
Q59KP6	Q59KP6_CANAL	431.548	3	AsKSELTPSHR	0.001		386	396	17.8	0.022	239310	Hypothetical protein (Fragment)
Q59KP6	Q59KP6_CANAL	476.567	3	sKASDLGYtVVK			792	803	19.7	0.039	239310	Hypothetical protein (Fragment)
Q59KQ1	Q59KQ1_CANAL	793.386	3	RVsNAPCIPVVATIDIGTTSAR	0.196	RVsNAPCIPVVATIDIGTTSAR	4	25	39.7	7.2e-06	69212.3	Potential glycerol kinase Gut1p
Q59KS4	Q59KS4_CANAL	574.591	3	APDIGSIHsMESLER	0.061	APDIGsIHSMESLER	599	613	44.3	3.2e-07	88772.9	Na+/H+ antiporter
Q59KS4	Q59KS4_CANAL	550.253	2	ATtSFSLHR	0.012		473	481	35.3	1.6e-05	88772.9	Na+/H+ antiporter
Q59KS4	Q59KS4_CANAL	495.215	2	SGsIMGMVK	0.024	SGsIMGMVK	693	701	30.8	2.4e-05	88772.9	Na+/H+ antiporter
Q59KS4	Q59KS4_CANAL	550.251	2	ATTsFSLHR	0.001		473	481	31.3	7.8e-05	88772.9	Na+/H+ antiporter
Q59KS4	Q59KS4_CANAL	579.925	3	APDIGSIHSmEsLER	0.014		599	613	28.7	0.00064	88772.9	Na+/H+ antiporter
Q59KS4	Q59KS4_CANAL	627.911	3	APDIGsIHsMEsLER			599	613	24.3	0.0063	88772.9	Na+/H+ antiporter
Q59KU3	Q59KU3_CANAL	565.252	2	TTTsFSLHR	0.002		518	526	26.7	0.02	70309.1	Na+/H+ antiporter
Q59KV8	Q59KV8_CANAL	488.57	3	FFGKGsISHTFR	0.014		32	43	38.3	3.9e-07	35591.2	Possible sphingolipid long chain base sensory protein
Q59KV8	Q59KV8_CANAL	492.725	2	GsISHTFR	0.355	GsISHTFR	36	43	30.9	1.8e-06	35591.2	Possible sphingolipid long chain base sensory protein
Q59KV8	Q59KV8_CANAL	618.972	3	APTASQLQAPPPPPsSTK	0.005		12	29	35.3	3.4e-05	35591.2	Possible sphingolipid long chain base sensory protein
Q59KV8	Q59KV8_CANAL	618.977	3	APtASQLQAPPPPPSSTK	0		12	29	38.4	5.5e-05	35591.2	Possible sphingolipid long chain base sensory protein
Q59KV8	Q59KV8_CANAL	492.723	2	GSISHtFR	0.018		36	43	25.2	8.1e-05	35591.2	Possible sphingolipid long chain base sensory protein
Q59KV8	Q59KV8_CANAL	521.731	2	YKDPQsPK	0.431	YKDPQsPK	158	165	29.7	0.00014	35591.2	Possible sphingolipid long chain base sensory protein
Q59KV8	Q59KV8_CANAL	760.352	3	StRAPTAsQLQAPPPPPSSTK			9	29	30.1	0.00072	35591.2	Possible sphingolipid long chain base sensory protein
Q59KV8	Q59KV8_CANAL	397.192	2	sKFFGK	NA		30	35	15.7	0.0067	35591.2	Possible sphingolipid long chain base sensory protein
Q59KV8	Q59KV8_CANAL	572.235	2	TYsLRsTR			4	11	17.9	0.028	35591.2	Possible sphingolipid long chain base sensory protein
Q59KX0	Q59KX0_CANAL	613.793	2	SAVASVsPSVSR	0.114	SAVASVsPSVSR	688	699	51.4	3.2e-07	100240	Potential Rho GTPase activator
Q59KX0	Q59KX0_CANAL	976.375	2	TDADEFYDAEAsPTPSR	0.022	TDADEFYDAEAsPTPSR	748	764	42.1	7.8e-06	100240	Potential Rho GTPase activator
Q59KX0	Q59KX0_CANAL	528.283	2	KSsVKDLAK	0.01		845	853	40.6	9.7e-06	100240	Potential Rho GTPase activator
Q59KX0	Q59KX0_CANAL	643.607	3	SPSNQsLNDLSStPPPK			821	837	34.6	1e-05	100240	Potential Rho GTPase activator
Q59KX0	Q59KX0_CANAL	643.6	3	SPsNQSLNDLSStPPPK			821	837	35.1	2.1e-05	100240	Potential Rho GTPase activator
Q59KX0	Q59KX0_CANAL	613.791	2	SAVAsVSPSVSR	0.101	SAVASVsPSVSR	688	699	32.1	2.1e-05	100240	Potential Rho GTPase activator
Q59KX0	Q59KX0_CANAL	464.239	2	sSVKDLAK	0.003		846	853	28.2	0.00041	100240	Potential Rho GTPase activator
Q59KX0	Q59KX0_CANAL	648.249	3	sFENGSTEDLQEPSsR			854	869	24	0.00057	100240	Potential Rho GTPase activator
Q59KX0	Q59KX0_CANAL	616.951	3	SPSNQSLNDLSsTPPPK	0.018		821	837	30.7	0.0014	100240	Potential Rho GTPase activator
Q59KX0	Q59KX0_CANAL	931.865	2	SFENGsTEDLQEPSSR	0		854	869	27.9	0.0056	100240	Potential Rho GTPase activator
Q59KX0	Q59KX0_CANAL	682.297	3	SAVASVsPSVsRNSSLtR			688	705	23.8	0.016	100240	Potential Rho GTPase activator
Q59KX0	Q59KX0_CANAL	427.2	3	SLtFKFDDVK	0.025	SLtFKFDDVK	321	330	20.8	0.043	100240	Potential Rho GTPase activator
Q59KX3	Q59KX3_CANAL	758.843	2	YLQNSGSLtPNSR	0.033	YLQNSGSLtPNSR	439	451	56.3	1.8e-09	97618.3	Potential fungal zinc cluster transcription factor
Q59KX4	Q59KX4_CANAL	580.767	2	sTIGVEFATR	0		46	55	35.7	1e-07	25119.2	Likely rab family GTP-binding protein
Q59KZ0	Q59KZ0_CANAL	715.322	3	Acetyl-SEEDVNKsNVMVESVDLK	0.024	MSEEDVNKsNVMVESVDLK	1	19	43.4	3.1e-06	84182.4	Hypothetical protein NOP4
Q59KZ1	Q59KZ1_CANAL	610.26	2	sVTDISFDAGK	0.031	sVTDISFDAGK	160	170	33.5	2e-05	107362	Hypothetical protein APE2
Q59KZ1	Q59KZ1_CANAL	736.795	2	sSDNSASVVNQER	0		88	100	34.3	5.8e-05	107362	Hypothetical protein APE2
Q59KZ1	Q59KZ1_CANAL	528.274	2	TSsLLDLVK	0.05	TSsLLDLVK	667	675	34.9	8.8e-05	107362	Hypothetical protein APE2
Q59KZ1	Q59KZ1_CANAL	863.375	2	sIYEWLEANEYTK	0.002		942	954	25.3	0.00083	107362	Hypothetical protein APE2
Q59KZ1	Q59KZ1_CANAL	478.734	2	KGVISStGK	0		7	15	24.7	0.0035	107362	Hypothetical protein APE2
Q59L07	Q59L07_CANAL	555.244	2	NDNLtPEVK	NA		402	410	30.9	0.00016	105643	Hypothetical protein (Fragment)
Q59L11	Q59L11_CANAL	690.288	2	LESYSSsAPSSGK	0.012		108	120	46	8.8e-07	78189.8	Hypothetical protein
Q59L11	Q59L11_CANAL	593.265	3	RGsNATDTSSVSSVSSR	0.018		691	707	38.2	5.9e-05	78189.8	Hypothetical protein
Q59L11	Q59L11_CANAL	672.349	3	KGSVPQsPIRPQSPAETR	0.014		599	616	28.2	0.0017	78189.8	Hypothetical protein
Q59L11	Q59L11_CANAL	716.332	3	ANLHIGDNNNTGSNSGGsIPK	0.022	ANLHIGDNNNTGSNSGGsIPK	188	208	21.4	0.046	78189.8	Hypothetical protein
Q59L13	Q59L13_CANAL	511.214	2	DTLIETYs	0.042	DTLIETYs	238	245	42.4	2.5e-06	26393.9	Potential eIF-like ribosomal biogenesis factor
Q59L18	Q59L18_CANAL	737.825	2	FNTGLSGGDNLsGR	0		490	503	50.8	3.4e-08	218982	Hypothetical protein STT4
Q59L18	Q59L18_CANAL	709.306	2	TsFTSFSQAFSK	0		515	526	38.7	2.7e-06	218982	Hypothetical protein STT4
Q59L18	Q59L18_CANAL	581.727	2	EAFAsPMSSR	0.109	EAFAsPMSSR	504	513	39.2	1.5e-05	218982	Hypothetical protein STT4
Q59L18	Q59L18_CANAL	544.248	3	RFNTGLSGGDNLsGR	0.106	RFNTGLSGGDNLsGR	489	503	32.8	2.7e-05	218982	Hypothetical protein STT4
Q59L18	Q59L18_CANAL	571.229	3	GANsSEFDENDYRK	0.035	GANsSEFDENDYRK	527	540	38.3	7.6e-05	218982	Hypothetical protein STT4
Q59L18	Q59L18_CANAL	618.276	2	SsFVTEIMNK	0		1047	1056	29.7	0.00025	218982	Hypothetical protein STT4
Q59L18	Q59L18_CANAL	525.253	3	RTSFtSFSQAFSK	0.012		514	526	19	0.0015	218982	Hypothetical protein STT4
Q59L21	Q59L21_CANAL	647.278	2	qPTLsPSSNTAK	0.011		63	74	35.4	2.8e-07	53644.8	Hypothetical protein RMD1
Q59L27	Q59L27_CANAL	900.048	3	qsSISTQEDDTNLYSDVDEIFTK	0		8	30	44.1	4.9e-07	58353.1	Hypothetical protein (Fragment)
Q59L27	Q59L27_CANAL	905.722	3	QsSISTQEDDTNLYSDVDEIFTK	0		8	30	30.8	2.7e-05	58353.1	Hypothetical protein (Fragment)
Q59L34	Q59L34_CANAL	767.028	3	NSSLPAQFQTQPsDDELTIK	0.04	NSSLPAQFQTQPsDDELTIK	31	50	30.3	0.0011	82230.1	Hypothetical protein MSS4
Q59L34	Q59L34_CANAL	462.737	2	DsILLKR	0		302	308	21.9	0.011	82230.1	Hypothetical protein MSS4
Q59L48	Q59L48_CANAL	474.554	3	SGLSYsKDELSR	0		464	475	33.9	0.00013	62851.4	Hypothetical protein MPP10
Q59L48	Q59L48_CANAL	771	3	VtDSISmEDAQPLHVSNESR	0.012		416	435	21.3	0.035	62851.4	Hypothetical protein MPP10
Q59L56	Q59L56_CANAL	559.253	2	ASsLSNLAmK	0.02		329	338	39.8	3.2e-08	81439.4	Hypothetical protein
Q59L56	Q59L56_CANAL	551.256	2	ASsLSNLAMK	0.024	ASsLSNLAMK	329	338	36.5	8.3e-06	81439.4	Hypothetical protein
Q59L93	Q59L93_CANAL	696.802	2	YtQNVIADNFK	0		704	714	32.7	2.6e-06	84885.6	Hypothetical protein
Q59LB0	Q59LB0_CANAL	553.265	2	LDAsHELLK	NA		285	293	27.5	4.7e-05	35593.3	Hypothetical protein
Q59LB4	Q59LB4_CANAL	499.233	2	Acetyl-sEVADKVK	NA		1	9	26.6	0.00021	81700	Hypothetical protein THS1
Q59LB4	Q59LB4_CANAL	652.274	3	NSsSYFLGDATNDSLQR	0		259	275	31.8	0.00071	81700	Hypothetical protein THS1
Q59LB9	Q59LB9_CANAL	746.301	2	NSsYTNLVNEDR	0.006		349	360	39	3.4e-06	45083.7	Hypothetical protein
Q59LB9	Q59LB9_CANAL	607.775	2	VPLIsPSVsR			339	348	26.4	3.6e-06	45083.7	Hypothetical protein
Q59LB9	Q59LB9_CANAL	567.8	2	VPLISPsVSR	0		339	348	28.4	6.1e-06	45083.7	Hypothetical protein
Q59LB9	Q59LB9_CANAL	656.778	2	QENNsSDLLGR	0.037	QENNsSDLLGR	76	86	34.5	8.7e-05	45083.7	Hypothetical protein
Q59LB9	Q59LB9_CANAL	421.574	3	KVPLISPSVsR	0.02		338	348	20.6	0.001	45083.7	Hypothetical protein
Q59LB9	Q59LB9_CANAL	464.266	3	KKVPLIsPSVSR	0.141	KKVPLIsPSVSR	337	348	18.9	0.014	45083.7	Hypothetical protein
Q59LC0	Q59LC0_CANAL	558.737	2	TVsNTSNASR	0.114	TVsNTSNASR	113	122	44.5	4e-08	31638.2	Hypothetical protein VIP1 (Fragment)
Q59LC0	Q59LC0_CANAL	830.364	2	AMASIAPMLESFsPK	0.013		46	60	37.4	0.00051	31638.2	Hypothetical protein VIP1 (Fragment)
Q59LC6	Q59LC6_CANAL	653.978	3	NTsIASSLSQNSQNSLTK	0.04	NTsIASSLSQNSQNSLTK	240	257	36.7	2.2e-06	109211	Hypothetical protein (Hypothetical protein CaJ7.0428)
Q59LC6	Q59LC6_CANAL	559.618	3	KLsFLSTGNNSITSK	0.026	KLsFLSTGNNSITSK	268	282	32.1	4.1e-06	109211	Hypothetical protein (Hypothetical protein CaJ7.0428)
Q59LC6	Q59LC6_CANAL	579.266	2	NLsTTTPTSR	0.068	NLsTTTPTSR	53	62	35.3	2.9e-05	109211	Hypothetical protein (Hypothetical protein CaJ7.0428)
Q59LC6	Q59LC6_CANAL	611.255	3	SGsKVDGSYFPDYSDK	0.002		315	330	30.1	0.00013	109211	Hypothetical protein (Hypothetical protein CaJ7.0428)
Q59LC6	Q59LC6_CANAL	486.723	2	ATKGRtAST	0.027	AtKGRTAST	947	955	15.1	0.035	109211	Hypothetical protein (Hypothetical protein CaJ7.0428)
Q59LC6	Q59LC6_CANAL	486.723	2	ATKGRTASt	0.04	AtKGRTAST	947	955	19.7	0.036	109211	Hypothetical protein (Hypothetical protein CaJ7.0428)
Q59LD0	Q59LD0_CANAL	607.974	3	KPsIINNPSISSNTNR	0.085	KPsIINNPSISSNTNR	21	36	40.4	1.6e-06	66726.3	Hypothetical protein RAM1
Q59LD1	Q59LD1_CANAL	670.835	2	sLSGLTLPMITK	0.049	SLSGLTLPMItK	301	312	26.4	0.00048	61007.1	Hypothetical protein NRO96
Q59LD1	Q59LD1_CANAL	697.009	3	SPsPTTLTFNQLPNNIHK	0.015		105	122	22.2	0.032	61007.1	Hypothetical protein NRO96
Q59LD6	Q59LD6_CANAL	630.629	3	NTsIASLFDNSIGDLSR	0		179	195	41.7	8.1e-06	65347.6	Hypothetical protein
Q59LD6	Q59LD6_CANAL	838.725	3	IFINDNDsTIMGEGNLDIPLDK	0		448	469	38.7	0.00083	65347.6	Hypothetical protein
Q59LG2	Q59LG2_CANAL	743.025	3	VGESWsQLEAQFKPQVVSK	0.047	VGESWsQLEAQFKPQVVSK	140	158	28.7	0.0025	43970.4	Hypothetical protein SCS2
Q59LI1	Q59LI1_CANAL	845.651	3	TNDYQPLEENEsDDNNSNDNK	0.022	TNDYQPLEENEsDDNNSNDNK	668	688	39.3	5.7e-07	77486.1	Potential transporter/amino acid permease
Q59LI5	Q59LI5_CANAL	669.802	2	NTIYtYIQSR	0.049	NTIYTyIQSR	153	162	44.4	8.6e-05	43756	Likely protein kinase Yak1
Q59LI5	Q59LI5_CANAL	669.803	2	NTIYTyIQSR	0.031	NTIYTyIQSR	153	162	39.2	0.00043	43756	Likely protein kinase Yak1
Q59LI6	Q59LI6_CANAL	661.97	3	KVtTQNIDDEENSAVLK	0.008		14	30	32.7	3.6e-05	17702.7	RNA polymerase II fourth largest subunit
Q59LI8	Q59LI8_CANAL	723.318	2	TTtTNSNDTALVK	0.048	TTTTNSNDtALVK	66	78	33.9	4.4e-05	116260	Potential spliceosomal translocase-like protein Snu114p
Q59LJ8	Q59LJ8_CANAL	667.802	2	sSVGVLPNYYR	0.008		260	270	27.8	0.00042	37065.2	Hypothetical protein
Q59LJ8	Q59LJ8_CANAL	524.232	3	RssVGVLPNYYR			259	270	23.7	0.011	37065.2	Hypothetical protein
Q59LK6	Q59LK6_CANAL	800.339	2	VDEQTELLEGSGsR	0.036	VDEQTELLEGSGsR	463	476	53.5	2.1e-06	63067.4	Hypothetical protein
Q59LK7	Q59LK7_CANAL	570.723	2	FSsLNTsPK			502	510	32.3	1.3e-06	96746.3	Likely protein kinase
Q59LK7	Q59LK7_CANAL	609.244	3	NNtLAATNQNsMTASK			397	412	33	1.5e-06	96746.3	Likely protein kinase
Q59LK7	Q59LK7_CANAL	530.733	2	FSSLNTsPK	0.013		502	510	33.9	2.5e-06	96746.3	Likely protein kinase
Q59LK7	Q59LK7_CANAL	530.742	2	FSSLNtSPK	0.043	FSSLNtSPK	502	510	38.3	2.2e-05	96746.3	Likely protein kinase
Q59LK7	Q59LK7_CANAL	712.692	3	TPsPKPPSSVNLLNATSMSK	0.011		562	581	35.2	2.3e-05	96746.3	Likely protein kinase
Q59LK7	Q59LK7_CANAL	739.343	3	tPSPKPPsSVNLLNATSMSK			562	581	33.7	2.9e-05	96746.3	Likely protein kinase
Q59LK7	Q59LK7_CANAL	596.757	2	WDFDsLSSR	0.184	WDFDsLSSR	347	355	41.7	0.00025	96746.3	Likely protein kinase
Q59LP4	Q59LP4_CANAL	837.045	3	qAPAEFLNQDEEDLAASGAAAsLK	0.176	qAPAEFLNQDEEDLAASGAAAsLK	197	220	52.2	1.6e-08	89639.8	Hypothetical protein
Q59LP4	Q59LP4_CANAL	842.719	3	QAPAEFLNQDEEDLAASGAAAsLK	0.158	QAPAEFLNQDEEDLAASGAAAsLK	197	220	47.8	2.7e-08	89639.8	Hypothetical protein
Q59LP4	Q59LP4_CANAL	708.624	3	DGDVSEFADFEDEVsLNR	0.46	DGDVSEFADFEDEVsLNR	787	804	51.8	3e-08	89639.8	Hypothetical protein
Q59LP4	Q59LP4_CANAL	809.837	2	DTsSIFSGEEPEIK	0		619	632	49.7	2.7e-07	89639.8	Hypothetical protein
Q59LP4	Q59LP4_CANAL	777.979	3	DGDVsEFADFEDEVsLNRK			787	805	37.6	5.1e-07	89639.8	Hypothetical protein
Q59LP4	Q59LP4_CANAL	858.926	2	SQtFTAASVVNASLLK	0.033	SQtFTAASVVNASLLK	235	250	38.3	9.3e-06	89639.8	Hypothetical protein
Q59LP4	Q59LP4_CANAL	473.912	3	RPVTPSAAQSPtK	0.07	RPVTPSAAQsPTK	689	701	31.5	1e-05	89639.8	Hypothetical protein
Q59LP4	Q59LP4_CANAL	760.343	2	VGIPSmNsNTIYK	0.001		117	129	33	1.6e-05	89639.8	Hypothetical protein
Q59LP4	Q59LP4_CANAL	555.253	2	qGATsLNIDK	0.016		158	167	36.6	2.5e-05	89639.8	Hypothetical protein
Q59LP4	Q59LP4_CANAL	898.897	2	sQTFTAAsVVNASLLK			235	250	37.1	2.5e-05	89639.8	Hypothetical protein
Q59LP4	Q59LP4_CANAL	656.626	3	IRDTSsIFsGEEPEIK			617	632	43.8	7.9e-05	89639.8	Hypothetical protein
Q59LP4	Q59LP4_CANAL	493.932	3	LNsLKSNNPATLK	0.059	LNsLKSNNPATLK	260	272	30.1	9.5e-05	89639.8	Hypothetical protein
Q59LP4	Q59LP4_CANAL	563.761	2	QGATsLNIDK	0.024	QGATsLNIDK	158	167	30.5	0.00011	89639.8	Hypothetical protein
Q59LP4	Q59LP4_CANAL	629.967	3	IRDTSsIFSGEEPEIK	0		617	632	32.2	0.00017	89639.8	Hypothetical protein
Q59LP4	Q59LP4_CANAL	465.745	2	RLsSIFK	0.01		709	715	24.1	0.00026	89639.8	Hypothetical protein
Q59LP4	Q59LP4_CANAL	465.738	2	RLSsIFK	0.003		709	715	25	0.00091	89639.8	Hypothetical protein
Q59LP4	Q59LP4_CANAL	752.339	2	VGIPSMNSNtIYK	0.007		117	129	23.4	0.0039	89639.8	Hypothetical protein
Q59LP4	Q59LP4_CANAL	569.943	3	ASGKPLsAEALYHQR	0.018		8	22	25.7	0.0041	89639.8	Hypothetical protein
Q59LP4	Q59LP4_CANAL	732.859	2	qGATsLNIDKINK	0.004		158	170	27.8	0.0057	89639.8	Hypothetical protein
Q59LP4	Q59LP4_CANAL	520.584	3	LNsLKsNNPATLK			260	272	24.9	0.0061	89639.8	Hypothetical protein
Q59LP4	Q59LP4_CANAL	396.18	2	KsSFSR	0.015		703	708	15.5	0.012	89639.8	Hypothetical protein
Q59LP4	Q59LP4_CANAL	661.272	2	YTtDIEEATAK	0.016		522	532	20.9	0.016	89639.8	Hypothetical protein
Q59LP7	Q59LP7_CANAL	465.881	3	REAtPPKsPPR			79	89	26.5	0.0033	86368.9	Hypothetical protein CDC9
Q59LP7	Q59LP7_CANAL	489.562	3	FFGSSSNNSsPKK	0		58	70	18.1	0.0052	86368.9	Hypothetical protein CDC9
Q59LQ1	Q59LQ1_CANAL	556.747	2	DISDNLsIR	0.088	DISDNLsIR	875	883	47	1.7e-07	104269	Hypothetical protein
Q59LQ1	Q59LQ1_CANAL	610.28	2	FSNTLtDLTK	0.011		625	634	30.8	2.2e-05	104269	Hypothetical protein
Q59LQ1	Q59LQ1_CANAL	485.882	3	FSNtLtDLTKR			625	635	30.5	0.00031	104269	Hypothetical protein
Q59LQ1	Q59LQ1_CANAL	650.277	2	FSNtLtDLTK			625	634	26.2	0.0012	104269	Hypothetical protein
Q59LR9	Q59LR9_CANAL	786.293	3	LSEFDTGYEsQsSDGFGNTR			280	299	38.6	1.3e-07	105107	Hypothetical protein
Q59LS1	Q59LS1_CANAL	492.265	3	sKPVALTAFLGYK	0.218	sKPVALTAFLGYK	38	50	29.6	1e-05	43949.1	Likely cytosolic ribosomal protein L3
Q59LS1	Q59LS1_CANAL	532.264	2	HGsLGFLPR	NA		11	19	33.2	1.1e-05	43949.1	Likely cytosolic ribosomal protein L3
Q59LS1	Q59LS1_CANAL	510.725	2	sLYVDTSR	0.12	sLYVDTSR	341	348	33.8	8.8e-05	43949.1	Likely cytosolic ribosomal protein L3
Q59LT7	Q59LT7_CANAL	846.714	3	qMsLGQSQDFTMEDLENFLNK	0.031	qMsLGQSQDFTMEDLENFLNK	367	387	51.8	5e-09	86436.8	Hypothetical protein
Q59LT7	Q59LT7_CANAL	622.306	2	GDsIVLPPPIR	NA		265	275	28.3	7.1e-05	86436.8	Hypothetical protein
Q59LT7	Q59LT7_CANAL	578.238	2	FQEDPQsPK	NA		590	598	23.7	7.4e-05	86436.8	Hypothetical protein
Q59LU2	Q59LU2_CANAL	728.007	3	RSsNLHGNSVADSLDNFIR	0		620	638	29.3	0.0004	102431	Potential phosphatidylethanolamine N-methyltransferase Cho2
Q59LU2	Q59LU2_CANAL	675.975	3	SsNLHGNSVADSLDNFIR	0.001		621	638	27	0.0013	102431	Potential phosphatidylethanolamine N-methyltransferase Cho2
Q59LU4	Q59LU4_CANAL	597.775	2	VAtPLEENNK	NA		862	871	38	2.5e-06	111856	Potential fungal zinc cluster transcription factor
Q59LU4	Q59LU4_CANAL	645.96	3	EREsLSQLFDNTSMAK	0.009		830	845	38.7	1.3e-05	111856	Potential fungal zinc cluster transcription factor
Q59LU4	Q59LU4_CANAL	767.804	2	TPYTMGtPSENEK	0.024	TPYTMGtPSENEK	369	381	35.8	1.9e-05	111856	Potential fungal zinc cluster transcription factor
Q59LU4	Q59LU4_CANAL	824.673	3	EIEDTQsPYSSTGLVSTGEsPK			5	26	38.8	2.8e-05	111856	Potential fungal zinc cluster transcription factor
Q59LU4	Q59LU4_CANAL	664.953	3	TLsVGSFDDSSNSAVSSPR	0.002		277	295	37.1	7.5e-05	111856	Potential fungal zinc cluster transcription factor
Q59LV5	Q59LV5_CANAL	715.81	2	NsVADSLDNFIR	0.138	NsVADSLDNFIR	627	638	26	0.00015	102500	Potential phosphatidylethanolamine N-methyltransferase Cho2
Q59LW7	Q59LW7_CANAL	663.623	3	NLSANTTLNQsPISsPGK			277	294	34.5	1.2e-05	71316.4	Hypothetical protein
Q59LW7	Q59LW7_CANAL	860.399	2	NIPLPsPPATDGFDAK	0.03	NIPLPsPPATDGFDAK	337	352	30.4	3.5e-05	71316.4	Hypothetical protein
Q59LW7	Q59LW7_CANAL	478.233	3	IPNNRDPtSPNK	0.003		295	306	31.5	0.00015	71316.4	Hypothetical protein
Q59LW7	Q59LW7_CANAL	636.97	3	NLSANTtLNQSPISSPGK	0.034	NLSANTTLNQsPISSPGK	277	294	28.2	0.00076	71316.4	Hypothetical protein
Q59LW7	Q59LW7_CANAL	562.77	4	IPNNRDPTsPNKYHFPDR	0		295	312	28.1	0.0037	71316.4	Hypothetical protein
Q59LW7	Q59LW7_CANAL	551.905	3	DPTsPNKYHFPDR	0.006		300	312	23.5	0.0055	71316.4	Hypothetical protein
Q59LX9	BTN1_CANAL	513.735	2	sQNIESIR	0.425	sQNIESIR	216	223	32.9	0.00015	48208.8	Protein BTN1 precursor
Q59LY1	Q59LY1_CANAL	591.784	2	LPsISELTSR	0.176	LPsISELTSR	24	33	40.9	6.7e-08	48162.7	Hypothetical protein
Q59LY1	Q59LY1_CANAL	497.25	2	LSsPTLPAK	0.01		118	126	17.9	0.031	48162.7	Hypothetical protein
Q59LY1	Q59LY1_CANAL	484.594	3	IRLPsISELTSR	0.054	IRLPsISELTSR	22	33	16	0.042	48162.7	Hypothetical protein
Q59LZ5	Q59LZ5_CANAL	552.253	2	ATsFEVLEK	0.026	ATsFEVLEK	213	221	32.4	0.0023	69680.9	Hypothetical protein TOM71 (Hypothetical protein CaJ7.0305)
Q59LZ9	Q59LZ9_CANAL	768.01	3	LTQIDDEtQQQFENQSVAK	0.012		4	22	29.9	0.0016	16656.4	Hypothetical protein TOM22 (Hypothetical protein CaJ7.0309)
Q59M23	Q59M23_CANAL	678.642	3	LNsNSSPSLSNSITEEFK	0.002		133	150	38	3.5e-06	88424.9	Hypothetical protein GSG1
Q59M23	Q59M23_CANAL	732.676	3	KFFNsNNNSDTSLLTNTAK	0.002		386	404	30.3	0.00025	88424.9	Hypothetical protein GSG1
Q59M23	Q59M23_CANAL	689.977	3	FFNSNNNSDtSLLTNTAK	0.012		387	404	33.7	0.00089	88424.9	Hypothetical protein GSG1
Q59M26	Q59M26_CANAL	747.357	3	DCLIQIINDANATTsPAQSK	0.009		253	272	29.9	4.8e-05	102240	Hypothetical protein CDC54
Q59M28	Q59M28_CANAL	485.219	2	TTtDPNLK	0.042	TTtDPNLK	201	208	28	0.00024	49213.3	Hypothetical protein
Q59M47	Q59M47_CANAL	678.297	3	LFDDESGDITELNGNVsK	0.292	LFDDESGDITELNGNVsK	111	128	37.5	3.8e-06	101195	Hypothetical protein
Q59M47	Q59M47_CANAL	711.974	3	QTLNEFDDGDDLTtLSGGR	0.048	QTLNEFDDGDDLTtLSGGR	133	151	37.9	8.6e-05	101195	Hypothetical protein
Q59M47	Q59M47_CANAL	855.374	3	NTSKQtLNEFDDGDDLTTLSGGR	0		129	151	23.7	0.009	101195	Hypothetical protein
Q59M49	Q59M49_CANAL	849.374	3	AKEVFEDmsVDDFFGGGFEVPK	NA		57	78	34.5	9.6e-05	81487.8	Hypothetical protein
Q59M49	Q59M49_CANAL	844.029	3	AKEVFEDMsVDDFFGGGFEVPK	NA		57	78	31.5	0.00026	81487.8	Hypothetical protein
Q59M52	Q59M52_CANAL	762.364	3	TLsTGAHDAAFNELLKPEYK	0.006		8	27	35.7	9.9e-06	129328	Hypothetical protein COP1 (Hypothetical protein)
Q59M72	Q59M72_CANAL	583.767	2	sLNQVSSSHK	0.09	sLNQVSSSHK	511	520	40.8	5.5e-09	92947.6	Potential signalling network protein
Q59M72	Q59M72_CANAL	777.344	2	TNVSDITSGHsISR	0.011		466	479	53	3.1e-08	92947.6	Potential signalling network protein
Q59M72	Q59M72_CANAL	718.003	3	LGsTGNFSHITTLHEADSGK	0.018		184	203	37	3.8e-08	92947.6	Potential signalling network protein
Q59M72	Q59M72_CANAL	518.567	3	TNVsDITSGHSISR	0.058	TNVsDITSGHSISR	466	479	41.3	2.7e-06	92947.6	Potential signalling network protein
Q59M72	Q59M72_CANAL	503.222	2	LSSTFsQR	0		522	529	39.1	1.5e-05	92947.6	Potential signalling network protein
Q59M72	Q59M72_CANAL	518.572	3	TNVSDItSGHSISR	0.003		466	479	39.8	1.6e-05	92947.6	Potential signalling network protein
Q59M72	Q59M72_CANAL	637.271	2	DGGLPYPTMsR	0.008		720	730	34.2	3.7e-05	92947.6	Potential signalling network protein
Q59M72	Q59M72_CANAL	545.23	3	TNVSDITSGHsIsR			466	479	32.5	4.5e-05	92947.6	Potential signalling network protein
Q59M72	Q59M72_CANAL	769.836	2	TVStNTTSASQAYK	0.002		495	508	32.3	7.2e-05	92947.6	Potential signalling network protein
Q59M72	Q59M72_CANAL	581.276	2	RLsSTFSQR	0.043	RLsSTFSQR	521	529	24.3	0.0012	92947.6	Potential signalling network protein
Q59M72	Q59M72_CANAL	545.231	3	TNVsDITsGHSISR			466	479	27.9	0.0033	92947.6	Potential signalling network protein
Q59M72	Q59M72_CANAL	635.947	3	NNEHTGDIsIEVTPGKD	0.025	NNEHTGDIsIEVTPGKD	806	822	28.2	0.0041	92947.6	Potential signalling network protein
Q59M72	Q59M72_CANAL	545.229	3	TNVsDITSGHSIsR			466	479	26.5	0.0061	92947.6	Potential signalling network protein
Q59M72	Q59M72_CANAL	844.024	3	TNVSDItSGHSISRVssTNTAR			466	487	26.5	0.0091	92947.6	Potential signalling network protein
Q59M72	Q59M72_CANAL	716.649	3	TTsIYNNDDTITDEQIPK	0		731	748	29.8	0.016	92947.6	Potential signalling network protein
Q59M72	Q59M72_CANAL	635.949	3	NNEHTGDISIEVtPGKD	0.117	NNEHtGDISIEVTPGKD	806	822	21.6	0.036	92947.6	Potential signalling network protein
Q59M77	Q59M77_CANAL	552.24	2	MSGsSINLSK	0.007		700	709	33.2	3.6e-05	117006	Hypothetical protein
Q59M77	Q59M77_CANAL	641.322	2	HLsMVSSIISK	0.054	HLsMVSSIISK	667	677	32.4	0.00028	117006	Hypothetical protein
Q59MA9	Q59MA9_CANAL	810.713	3	NNtPPQSNPEIANQSIDEILR	0.011		1327	1347	39.4	0.00025	155836	Potential translation initiation factor subunit
Q59MA9	Q59MA9_CANAL	610.265	2	VVYGLSSDGsR	0.005		547	557	25.2	0.00045	155836	Potential translation initiation factor subunit
Q59MC8	Q59MC8_CANAL	598.591	3	ASELQNVDStFMESR	0		395	409	50.9	8.4e-09	70083.1	Hypothetical protein
Q59ME9	Q59ME9_CANAL	559.752	2	SYNsVLDLK	0.054	SYNsVLDLK	11	19	42.2	1.9e-07	59775.8	Hypothetical protein HOM3
Q59ME9	Q59ME9_CANAL	554.242	2	Acetyl-sQSPTNVPR	0.034	MsQSPTNVPR	1	10	30.6	2.9e-05	59775.8	Hypothetical protein HOM3
Q59ME9	Q59ME9_CANAL	848.714	3	GEAtPPHPPAAFEQLAmSSLLQR	0.233	GEAtPPHPPAAFEQLAmSSLLQR	351	373	38.3	4.1e-05	59775.8	Hypothetical protein HOM3
Q59ME9	Q59ME9_CANAL	554.243	2	Acetyl-SQsPTNVPR	0.002		1	10	27.4	0.00019	59775.8	Hypothetical protein HOM3
Q59ME9	Q59ME9_CANAL	573.217	2	sQsPTNVPR			1	10	24.4	0.00086	59775.8	Hypothetical protein HOM3
Q59ME9	Q59ME9_CANAL	642.312	3	LAsPTNSASGATGGWIVQK	0.006		20	38	26.8	0.0031	59775.8	Hypothetical protein HOM3
Q59MF5	Q59MF5_CANAL	544.758	2	KLsLNDYR	0.615	KLsLNDYR	715	722	32.3	6.9e-06	92500.3	Hypothetical protein
Q59MF5	Q59MF5_CANAL	578.252	2	SAsPGLESLSK	0.007		136	146	21.3	0.0017	92500.3	Hypothetical protein
Q59MF8	Q59MF8_CANAL	838.837	2	CLQTLsQKAQsPR			506	518	24.7	0.024	64325.2	Hypothetical protein XBP1
Q59MF9	Q59MF9_CANAL	758.006	3	SSsISSDSRPIYMSAHDPVR	0		379	398	27.8	0.0019	88477.8	Potential intra-Golgi transport complex subunit 6
Q59MG4	Q59MG4_CANAL	529.585	3	HSsLPLDTSGISHR	0.008		348	361	41.3	3e-06	59347.2	Hypothetical protein
Q59MG4	Q59MG4_CANAL	653.779	2	GGsFSQGSPFQK	0.041	GGsFSQGSPFQK	252	263	42.7	1.1e-05	59347.2	Hypothetical protein
Q59MG4	Q59MG4_CANAL	808.836	2	LSsVTSGPESSESNR	0.013		362	376	32.3	1.7e-05	59347.2	Hypothetical protein
Q59MG4	Q59MG4_CANAL	838.045	3	GGsGGGVGSQQDTFNVNPGPPLSFR	0.016		268	292	31.8	0.00094	59347.2	Hypothetical protein
Q59MG4	Q59MG4_CANAL	679.343	3	SsPSIPFQEQQILRPTK	0		458	474	15.8	0.031	59347.2	Hypothetical protein
Q59MJ8	Q59MJ8_CANAL	716.991	3	TEIPTIIETSETEsFSER	0.051	TEIPTIIETSETEsFSER	1	19	38.4	4.6e-06	24520.4	Hypothetical protein
Q59MJ8	Q59MJ8_CANAL	674.977	3	AHVPDDTAsLDDLFADLK	0.057	AHVPDDTAsLDDLFADLK	20	37	36.1	6.3e-05	24520.4	Hypothetical protein
Q59MJ8	Q59MJ8_CANAL	717.671	3	AHVPDDtASLDDLFADLKK	0		20	38	23.3	0.012	24520.4	Hypothetical protein
Q59MJ9	Q59MJ9_CANAL	607.275	2	sAPSQFLNNR	0.278	sAPSQFLNNR	45	54	39.6	3.5e-07	37501.9	Hypothetical protein
Q59MJ9	Q59MJ9_CANAL	821.859	2	SMsSSSSIFSSITGGK	0.009		62	77	27	0.00048	37501.9	Hypothetical protein
Q59MJ9	Q59MJ9_CANAL	776.892	2	QLPVVTSNTAsSIR	0.01		31	44	19.9	0.022	37501.9	Hypothetical protein
Q59MK1	Q59MK1_CANAL	607.779	2	LGSGGPsIFGDK	0.002		532	543	26.3	0.0024	92837.7	Hypothetical protein NUP159
Q59MK4	Q59MK4_CANAL	682.307	2	SLsNVLMMFNK	0.021	SLsNVLMMFNK	11	21	32.3	7.4e-06	68897.6	Potential calcineurin-like phosphoesterase
Q59MK4	Q59MK4_CANAL	690.312	2	SLsNVLMmFNK	0.008		11	21	32.1	8.6e-06	68897.6	Potential calcineurin-like phosphoesterase
Q59ML0	Q59ML0_CANAL	647.793	2	TPsPLGNAGASSR	0.031	TPsPLGNAGASSR	210	222	49.6	2.8e-09	91707.1	Hypothetical protein
Q59ML0	Q59ML0_CANAL	476.715	2	GNTLsPQR	0.111	GNTLsPQR	362	369	29.6	2e-05	91707.1	Hypothetical protein
Q59ML0	Q59ML0_CANAL	796.845	2	EItGSNSFGNVPYK	0.004		629	642	30.3	0.00014	91707.1	Hypothetical protein
Q59ML0	Q59ML0_CANAL	425.696	2	LSPsPNR	0.658	LSPsPNR	223	229	21.3	0.00087	91707.1	Hypothetical protein
Q59MN7	Q59MN7_CANAL	684.016	3	RGsTYHSPLNIVQATAVR	0.006		364	381	39.4	3.7e-06	147724	Hypothetical protein MYO5
Q59MN7	Q59MN7_CANAL	509.224	2	RMsMLGSR	0.04	RMsMLGSR	791	798	37.7	2.6e-05	147724	Hypothetical protein MYO5
Q59MN7	Q59MN7_CANAL	525.223	2	RmsmLGSR	0.025	RmsmLGSR	791	798	25.5	0.00017	147724	Hypothetical protein MYO5
Q59MN7	Q59MN7_CANAL	517.223	2	RmsMLGSR	0.034	RmsMLGSR	791	798	30.6	0.00017	147724	Hypothetical protein MYO5
Q59MN7	Q59MN7_CANAL	431.181	2	MsMLGSR	0.186	MsMLGSR	792	798	30.5	0.0026	147724	Hypothetical protein MYO5
Q59MN7	Q59MN7_CANAL	517.222	2	RMsmLGSR	0.012		791	798	20.7	0.0094	147724	Hypothetical protein MYO5
Q59MN7	Q59MN7_CANAL	631.974	3	GStYHSPLNIVQATAVR	0.001		365	381	25.4	0.026	147724	Hypothetical protein MYO5
Q59MN7	Q59MN7_CANAL	509.219	2	RMSMLGsR	0.034	RMsMLGSR	791	798	19.1	0.04	147724	Hypothetical protein MYO5
Q59MN9	Q59MN9_CANAL	576.275	3	TNDNLKNsPYQKPK	0.056	TNDNLKNsPYQKPK	56	69	34	0.00013	60272.5	Hypothetical protein SRB8 (Fragment)
Q59MN9	Q59MN9_CANAL	576.28	3	TNDNLKNSPyQKPK	0.016		56	69	23.1	0.037	60272.5	Hypothetical protein SRB8 (Fragment)
Q59MQ8	Q59MQ8_CANAL	614.592	3	ASsNFLLSIsDSERR			664	678	30	0.00016	101040	Hypothetical protein YAT2 (Putative carnitine acetyltransferase)
Q59MQ8	Q59MQ8_CANAL	587.944	3	ASSNFLLsISDSERR	0.003		664	678	36.1	0.00062	101040	Hypothetical protein YAT2 (Putative carnitine acetyltransferase)
Q59MQ8	Q59MQ8_CANAL	404.202	3	RHsFTNLQK	0.01		806	814	23	0.0046	101040	Hypothetical protein YAT2 (Putative carnitine acetyltransferase)
Q59MQ8	Q59MQ8_CANAL	803.711	3	LSHSQDtLSSVQSVLEEDVQK	0.005		853	873	33.3	0.011	101040	Hypothetical protein YAT2 (Putative carnitine acetyltransferase)
Q59MR4	Q59MR4_CANAL	664.794	2	GTQFGLQTPGsR	0.081	GTQFGLQTPGsR	272	283	50.8	3.7e-10	36938.9	Hypothetical protein HEM13
Q59MT4	Q59MT4_CANAL	874.702	3	YSsNDELSSGTTSGMPLNNHSSTR	0.005		190	213	35.9	4.7e-06	33379.2	Potential Sin3.Rpd3 histone deacetylase complex component Sds3p
Q59MU3	Q59MU3_CANAL	899.726	3	IYQYQPSQQYsPSNLDYIPQGK	0.011		407	428	26.9	0.00018	70812.2	Hypothetical protein
Q59MV1	ASF1_CANAL	456.2	2	EEIStPR	0.024	EEIStPR	209	215	26	0.0044	27993.2	Histone chaperone ASF1 (Anti-silencing function protein 1)
Q59MV2	Q59MV2_CANAL	820.871	2	LESTPISQsTPASSR	0.008		355	369	31.2	4.5e-05	69888.7	Hypothetical protein
Q59MV4	Q59MV4_CANAL	790.876	2	NsSLALNSLNAALGR	0.012		134	148	48.9	1.3e-09	16239.7	Hypothetical protein
Q59MV4	Q59MV4_CANAL	579.635	3	RNSsLALNSLNAALGR	0		133	148	33.9	2.1e-05	16239.7	Hypothetical protein
Q59MV4	Q59MV4_CANAL	579.759	2	HVQYGYsPK	0.011		52	60	27.5	5.3e-05	16239.7	Hypothetical protein
Q59MV4	Q59MV4_CANAL	606.293	3	RNssLALNSLNAALGR			133	148	31.6	0.0016	16239.7	Hypothetical protein
Q59MV4	Q59MV4_CANAL	606.291	3	RNsSLALNsLNAALGR			133	148	21	0.047	16239.7	Hypothetical protein
Q59MW2	Q59MW2_CANAL	520.246	2	LSSVStHTK	0.005		144	152	32.3	9.7e-05	68566.7	Hypothetical protein DBP6 (Hypothetical protein)
Q59MW2	Q59MW2_CANAL	739.35	2	VGDILVNAstGSGK			217	230	16.7	0.033	68566.7	Hypothetical protein DBP6 (Hypothetical protein)
Q59MZ2	Q59MZ2_CANAL	691.834	2	KtGSILGDEINR	0.003		1151	1162	29.4	0.00017	176817	Hypothetical protein CDC25
Q59MZ2	Q59MZ2_CANAL	682.64	3	NAPsFSSINESIFHNSSK	0.008		164	181	22.7	0.011	176817	Hypothetical protein CDC25
Q59MZ2	Q59MZ2_CANAL	408.547	3	RVsVALQNTR	0.313	RVsVALQNTR	251	260	23.1	0.03	176817	Hypothetical protein CDC25
Q59MZ5	Q59MZ5_CANAL	737.334	2	FVMVEIEsSPQK	0.006		1235	1246	22.2	0.0066	150811	Hypothetical protein ADE6
Q59MZ5	Q59MZ5_CANAL	521.258	3	IFNADWtIDGTTK	0.327	IFNADWtIDGTTK	275	287	17.7	0.043	150811	Hypothetical protein ADE6
Q59MZ6	Q59MZ6_CANAL	448.191	2	MsYSSIK	0.031	MsYSSIK	314	320	23	0.0064	61834.3	Potential mitochondrial membrane protein
Q59N00	Q59N00_CANAL	553.91	3	YADGFMIHsGQPTR	0.034	YADGFMIHsGQPTR	153	166	29.8	8.7e-06	27285.8	Likely cytosolic ribosomal protein S3
Q59N00	Q59N00_CANAL	441.261	3	KTPsKLEVIVK	0.033	KTPsKLEVIVK	42	52	23.8	0.00018	27285.8	Likely cytosolic ribosomal protein S3
Q59N01	Q59N01_CANAL	498.257	2	KLsILDLN	NA		94	101	32.1	0.0026	11433.1	Hypothetical protein
Q59N02	Q59N02_CANAL	591.765	2	RyLsLENK			230	237	25.2	0.013	92314	Hypothetical protein
Q59N29	SPB41_CANAL	645.259	2	NNSIQGsFDDL	0.298	NNSIQGsFDDL	621	631	41.1	3.3e-07	72353.7	ATP-dependent rRNA helicase SPB41 (EC 3.6.1.-)
Q59N33	Q59N33_CANAL	458.197	3	SEsITAFHNMR	0.035	SEsITAFHNMR	1419	1429	31.6	8.5e-06	226773	Hypothetical protein MYO1
Q59N38	Q59N38_CANAL	714.879	2	SIsPIPAPVGLAAR	0.031	SIsPIPAPVGLAAR	143	156	34.8	6.2e-07	111491	Hypothetical protein
Q59N38	Q59N38_CANAL	475.548	3	IDDMSPtKPNAR	0.017		69	80	29.2	0.0012	111491	Hypothetical protein
Q59N38	Q59N38_CANAL	723.308	2	LsSLEDSSTPSSR	0.009		130	142	25.7	0.0023	111491	Hypothetical protein
Q59N38	Q59N38_CANAL	616.28	2	IHIFLIstK			884	892	26	0.0026	111491	Hypothetical protein
Q59N38	Q59N38_CANAL	644.309	2	FQQLVEQTsK	0.007		23	32	23.5	0.0066	111491	Hypothetical protein
Q59N38	Q59N38_CANAL	797.021	3	GIITDDVSGYDEEDEsPVKIK	0.019		41	61	24.2	0.019	111491	Hypothetical protein
Q59N38	Q59N38_CANAL	716.633	3	GIITDDVSGYDEEDEsPVK	0.074	GIITDDVSGYDEEDEsPVK	41	59	23.1	0.019	111491	Hypothetical protein
Q59N38	Q59N38_CANAL	763.296	2	LsSLEDSSTPSsR			130	142	23.9	0.04	111491	Hypothetical protein
Q59N42	Q59N42_CANAL	676.297	3	Acetyl-SNNIEDDsISVDNIVDR	0.019		1	18	42.9	2.9e-05	37824.7	Potential protein phosphatase
Q59N76	Q59N76_CANAL	671.793	2	QGsATGVNGSQTR	0.018		457	469	36.9	1.2e-07	86206.1	Hypothetical protein BUD7
Q59N76	Q59N76_CANAL	663.272	2	qGSATGVNGSQtR	0.018		457	469	28.4	5.7e-05	86206.1	Hypothetical protein BUD7
Q59N76	Q59N76_CANAL	663.262	2	qGsATGVNGSQTR	0.008		457	469	32.4	6.7e-05	86206.1	Hypothetical protein BUD7
Q59N76	Q59N76_CANAL	598.928	3	NSSNQsTTFIHSYTK	0.011		646	660	31.4	0.0011	86206.1	Hypothetical protein BUD7
Q59N77	Q59N77_CANAL	732.989	3	SVSAPEDIRPSTsNGDQSNR	0.002		1	21	40.5	3.4e-05	26109	Hypothetical protein TAF9
Q59N77	Q59N77_CANAL	746.999	3	Acetyl-SVSAPEDIRPSTSNGDQsNR	0.002		1	21	31.3	0.003	26109	Hypothetical protein TAF9
Q59N98	Q59N98_CANAL	732.989	3	SVSAPEDIRPSTsNGDQSNR	0.002		1	21	40.5	3.4e-05	25790.6	Hypothetical protein TAF9
Q59N98	Q59N98_CANAL	746.999	3	Acetyl-SVSAPEDIRPSTSNGDQsNR	0.002		1	21	31.3	0.003	25790.6	Hypothetical protein TAF9
Q59NA6	Q59NA6_CANAL	535.745	2	KLsSDSTPR	0.044	KLsSDSTPR	32	40	26.3	0.00019	23048.3	Hypothetical protein (Fragment)
Q59NC1	Q59NC1_CANAL	818.365	2	APYPEIPQVSsPDR	0.008		150	163	29.5	6.9e-05	30862.4	Likely mitochondrial ribosomal protein S5
Q59NC2	Q59NC2_CANAL	783.334	2	SNsTGSVPYLDMSK	0.003		7	20	34.2	1.3e-06	47653.7	Potential membrane protein
Q59NC2	Q59NC2_CANAL	791.335	2	sNSTGSVPYLDmSK	0.004		7	20	27.8	3.5e-05	47653.7	Potential membrane protein
Q59NC5	Q59NC5_CANAL	721	3	EEsDGELGSPHSQQQVLLK	0.249	EEsDGELGSPHSQQQVLLK	521	539	27	0.0017	94133.7	Hypothetical protein
Q59NC5	Q59NC5_CANAL	411.861	3	NLsPTEDHLK	0.039	NLsPTEDHLK	496	505	21.4	0.018	94133.7	Hypothetical protein
Q59NG8	Q59NG8_CANAL	850.676	3	IGCVDESGDFsDDEFDIEAPPR	0.007		480	501	40.2	1.3e-05	73298.6	Hypothetical protein NHX1
Q59NH8	Q59NH8_CANAL	470.75	2	KVsGALASK	0.064	KVsGALASK	346	354	32	0.00011	55912.1	Hypothetical protein CDC14
Q59NK5	Q59NK5_CANAL	539.558	3	REsMDIDNGADWK	NA		885	897	24.1	0.0074	101302	Hypothetical protein STU2
Q59NL0	Q59NL0_CANAL	773.292	3	LVDYNEDNDsDDYDTTTSR	0.021	LVDYNEDNDsDDYDTTTSR	5	23	47.2	3.8e-06	34240	Potential membrane protein
Q59NL0	Q59NL0_CANAL	825.328	3	LVDYNEDNDsDDYDTTTSRR	0.049	LVDYNEDNDsDDYDTTTSRR	5	24	37.8	4.1e-06	34240	Potential membrane protein
Q59NL1	Q59NL1_CANAL	694.278	3	HILTDEDEsDEDEYYK	0.102	HILTDEDEsDEDEYYK	11	26	30.3	3.1e-05	41224.4	Hypothetical protein
Q59NL1	Q59NL1_CANAL	826.678	3	HILTDEDEsDEDEYYKQLR	0.046	HILTDEDEsDEDEYYKQLR	11	29	32.2	7.7e-05	41224.4	Hypothetical protein
Q59NM4	Q59NM4_CANAL	822.839	2	DLsASEEESELDLK	0.021	DLsASEEESELDLK	220	233	48.4	1.1e-07	44566.7	Hypothetical protein PCD1
Q59NM4	Q59NM4_CANAL	660.313	2	ASVtPPNVTPTR	0.026	ASVtPPNVTPTR	244	255	44.5	2.3e-07	44566.7	Hypothetical protein PCD1
Q59NM4	Q59NM4_CANAL	700.293	2	ASVtPPNVtPTR			244	255	39.6	3.5e-07	44566.7	Hypothetical protein PCD1
Q59NM4	Q59NM4_CANAL	713.339	2	SLsPAAAATTITNK	0.004		256	269	25.8	0.00018	44566.7	Hypothetical protein PCD1
Q59NM4	Q59NM4_CANAL	693.963	3	NIKDLsAsEEESELDLK			217	233	30.2	0.00031	44566.7	Hypothetical protein PCD1
Q59NM4	Q59NM4_CANAL	667.305	3	NIKDLsASEEESELDLK	0.009		217	233	36.1	0.00072	44566.7	Hypothetical protein PCD1
Q59NM8	Q59NM8_CANAL	796.693	3	RLsMNSNGITQAGSESDPGASTK	0.012		88	110	46.7	9.8e-08	32550.9	Hypothetical protein
Q59NN9	Q59NN9_CANAL	618.29	2	tVDQVIDLPR	NA		119	128	36.7	5.3e-07	50949.3	Hypothetical protein MMS4
Q59NN9	Q59NN9_CANAL	484.254	3	sKTVDQVIDLPR	0.001		117	128	29.7	0.00054	50949.3	Hypothetical protein MMS4
Q59NN9	Q59NN9_CANAL	484.252	3	SKtVDQVIDLPR	0.001		117	128	35.6	0.00058	50949.3	Hypothetical protein MMS4
Q59NP0	Q59NP0_CANAL	508.719	2	RYsGNSPR	0.009		5	12	27.6	0.0021	126884	Hypothetical protein SEC8
Q59NP1	Q59NP1_CANAL	854.016	3	EVVSDEsIDKQNsPQHEETTK			153	173	40.9	7.3e-08	27859.3	Hypothetical protein CTR1
Q59NQ0	Q59NQ0_CANAL	770.79	2	ELGDAYVSsDEEF	0.01		1038	1050	40.9	2.8e-10	116984	Translation elongation factor 3
Q59NQ0	Q59NQ0_CANAL	834.826	2	KELGDAYVSsDEEF	0.027	KELGDAYVsSDEEF	1037	1050	34.7	2.6e-07	116984	Translation elongation factor 3
Q59NQ0	Q59NQ0_CANAL	767.672	3	KCPsAQSYYELGASDLEFR	0.009		636	654	40.7	5.4e-06	116984	Translation elongation factor 3
Q59NQ0	Q59NQ0_CANAL	626.256	3	KKELGDAYVssDEEF			1036	1050	24.5	3e-05	116984	Translation elongation factor 3
Q59NQ0	Q59NQ0_CANAL	492.252	2	KLsSAELR	0.023	KLsSAELR	1019	1026	30.1	0.00026	116984	Translation elongation factor 3
Q59NQ0	Q59NQ0_CANAL	599.596	3	KKELGDAYVsSDEEF	0		1036	1050	19.8	0.0017	116984	Translation elongation factor 3
Q59NQ0	Q59NQ0_CANAL	874.828	2	KELGDAYVssDEEF			1037	1050	20.4	0.0043	116984	Translation elongation factor 3
Q59NQ5	Q59NQ5_CANAL	715.308	2	qLsTTTMAPTSTK	0.002		20	32	34.4	1.7e-05	56483.9	Likely glutathione oxidoreductase
Q59NQ5	Q59NQ5_CANAL	723.315	2	qLsTTTmAPTSTK	0		20	32	35.1	1.9e-05	56483.9	Likely glutathione oxidoreductase
Q59NQ5	Q59NQ5_CANAL	723.83	2	QLStTTMAPTSTK	0.005		20	32	33.6	2e-05	56483.9	Likely glutathione oxidoreductase
Q59NQ5	Q59NQ5_CANAL	961.898	2	HFDyLVIGGGsGGVASAR			37	54	30.9	0.0022	56483.9	Likely glutathione oxidoreductase
Q59NQ7	Q59NQ7_CANAL	686.842	2	qLQVLQQLsPR	NA		129	139	47.3	4.2e-08	123014	Potential fungal zinc cluster transcription factor
Q59NQ7	Q59NQ7_CANAL	695.35	2	QLQVLQQLsPR	NA		129	139	33.7	2.4e-07	123014	Potential fungal zinc cluster transcription factor
Q59NQ7	Q59NQ7_CANAL	612.621	3	mGPIAVKMENSNSFsK	0.005		1	16	19.2	0.023	123014	Potential fungal zinc cluster transcription factor
Q59NQ9	FYV7_CANAL	499.59	3	KSTtKGQPLmGPR	0.002		116	128	26.5	0.033	16786.6	Protein FYV7
Q59NR9	Q59NR9_CANAL	790.805	2	TDSDDQsFTDEIK	0.073	TDSDDQsFTDEIK	376	388	44	1.7e-06	52484.9	Hypothetical protein
Q59NU9	Q59NU9_CANAL	770.79	2	ELGDAYVSsDEEF	0.01		1038	1050	40.9	2.8e-10	116926	Translation elongation factor 3
Q59NU9	Q59NU9_CANAL	625.944	3	MtPSGHNWVQGQGSGPR	0.108	MtPSGHNWVQGQGSGPR	976	992	45.7	3.7e-08	116926	Translation elongation factor 3
Q59NU9	Q59NU9_CANAL	625.944	3	MTPSGHNWVQGQGsGPR	0.064	MTPSGHNWVQGQGsGPR	976	992	34.5	1.1e-07	116926	Translation elongation factor 3
Q59NU9	Q59NU9_CANAL	834.826	2	KELGDAYVSsDEEF	0.027	KELGDAYVsSDEEF	1037	1050	34.7	2.6e-07	116926	Translation elongation factor 3
Q59NU9	Q59NU9_CANAL	767.672	3	KCPsAQSYYELGASDLEFR	0.009		636	654	40.7	5.4e-06	116926	Translation elongation factor 3
Q59NU9	Q59NU9_CANAL	626.256	3	KKELGDAYVssDEEF			1036	1050	24.5	3e-05	116926	Translation elongation factor 3
Q59NU9	Q59NU9_CANAL	631.27	3	mTPSGHNWVQGQGsGPR	0.115	mTPSGHNWVQGQGsGPR	976	992	29.3	0.00019	116926	Translation elongation factor 3
Q59NU9	Q59NU9_CANAL	492.252	2	KLsSAELR	0.023	KLsSAELR	1019	1026	30.1	0.00026	116926	Translation elongation factor 3
Q59NU9	Q59NU9_CANAL	599.596	3	KKELGDAYVsSDEEF	0		1036	1050	19.8	0.0017	116926	Translation elongation factor 3
Q59NU9	Q59NU9_CANAL	874.828	2	KELGDAYVssDEEF			1037	1050	20.4	0.0043	116926	Translation elongation factor 3
Q59NW5	Q59NW5_CANAL	925.385	2	DVIYAsDEELDQSSAK	0.026	DVIYAsDEELDQSSAK	701	716	53	8.4e-09	144963	Hypothetical protein TOF1
Q59NW5	Q59NW5_CANAL	564.723	2	LVIsDDEEE	NA		1255	1263	35.6	5.9e-06	144963	Hypothetical protein TOF1
Q59NW5	Q59NW5_CANAL	642.772	2	RLVIsDDEEE	NA		1254	1263	28.3	3.9e-05	144963	Hypothetical protein TOF1
Q59NW5	Q59NW5_CANAL	486.748	2	FGsLLSIR	0.134	FGsLLSIR	408	415	23.3	0.014	144963	Hypothetical protein TOF1
Q59NW5	Q59NW5_CANAL	526.899	3	DLLDDDDsQHVVK	NA		1090	1102	26.3	0.021	144963	Hypothetical protein TOF1
Q59NX3	Q59NX3_CANAL	529.747	2	LGsPTQTFK	0.148	LGsPTQTFK	47	55	30.5	7.2e-06	14317.2	Potential diphthamide methyltransferase
Q59NX3	Q59NX3_CANAL	931.399	3	FVEQDQEFFKPAPYVPPEDVDsE	0.14	FVEQDQEFFKPAPYVPPEDVDsE	102	124	27.9	0.00036	14317.2	Potential diphthamide methyltransferase
Q59NX6	Q59NX6_CANAL	735.325	2	sPTSTTQQPVTSR	0.004		1	14	39.3	8.1e-07	31431.8	Hypothetical protein ALD98
Q59NY7	CUE1_CANAL	519.744	2	LAAQLsNEL	NA		181	189	38.9	1.1e-06	21192.1	Coupling of ubiquitin conjugation to ER degradation protein 1
Q59NZ1	Q59NZ1_CANAL	595.277	2	FTLTSNPtTK	0.001		302	311	46.3	3.9e-08	85934.5	Hypothetical protein NIUP2
Q59NZ1	Q59NZ1_CANAL	854.028	3	DGmPNYsDGEPDAPAIASSDVLSR	0.015		13	36	42.9	7e-07	85934.5	Hypothetical protein NIUP2
Q59NZ1	Q59NZ1_CANAL	848.691	3	DGMPNySDGEPDAPAIASSDVLSR	0		13	36	45.2	2.4e-06	85934.5	Hypothetical protein NIUP2
Q59NZ1	Q59NZ1_CANAL	553.233	2	sSPFTFDPK	0		312	320	22	0.011	85934.5	Hypothetical protein NIUP2
Q59NZ6	Q59NZ6_CANAL	883.058	3	DSFKPPVPIDDIENGsISStQLK			40	62	39.6	1.6e-05	62701.6	Potential general amino acid permease
Q59NZ8	Q59NZ8_CANAL	905.896	2	SsTSLTNMTNILSmSK	0		284	299	46.8	6.3e-10	60519	Hypothetical protein
Q59NZ8	Q59NZ8_CANAL	658.291	3	RAssLSGINELGGYNFK			423	439	39	2.2e-07	60519	Hypothetical protein
Q59NZ8	Q59NZ8_CANAL	868.894	2	ASsLSGINELGGYNFK	0.003		424	439	34.2	4.6e-07	60519	Hypothetical protein
Q59NZ8	Q59NZ8_CANAL	641.647	3	KSsTSLTNMTNILSMSK	0		283	299	42.6	1.4e-06	60519	Hypothetical protein
Q59NZ8	Q59NZ8_CANAL	897.907	2	SsTSLTNMTNILSMSK	0		284	299	35.5	7.5e-06	60519	Hypothetical protein
Q59NZ8	Q59NZ8_CANAL	905.891	2	SSTSLTNMtNILSmSK	0.002		284	299	28.6	0.00012	60519	Hypothetical protein
Q59NZ8	Q59NZ8_CANAL	897.907	2	SSTSLtNMTNILSMSK	0		284	299	30.7	0.00023	60519	Hypothetical protein
Q59NZ8	Q59NZ8_CANAL	668.294	3	KsSTsLTNMTNILSMSK			283	299	32.9	0.00025	60519	Hypothetical protein
Q59NZ8	Q59NZ8_CANAL	646.973	3	KsSTSLTNMTNILSmSK	0.005		283	299	25.9	0.0003	60519	Hypothetical protein
Q59NZ8	Q59NZ8_CANAL	641.637	3	KSSTSLTNMtNILSMSK	0		283	299	26.8	0.0019	60519	Hypothetical protein
Q59NZ8	Q59NZ8_CANAL	447.903	3	KsSVHHQTIPK	0.001		330	340	21.1	0.046	60519	Hypothetical protein
Q59P09	Q59P09_CANAL	758.672	3	RLsFNDGSDIIESDFFGFK	0.012		78	96	38.8	3e-06	102250	Hypothetical protein
Q59P09	Q59P09_CANAL	499.241	3	EIELGRLsLDDR	NA		157	168	36.4	1.7e-05	102250	Hypothetical protein
Q59P09	Q59P09_CANAL	722.829	2	NFGTAsISGGIANR	0.013		124	137	39.1	4e-05	102250	Hypothetical protein
Q59P09	Q59P09_CANAL	511.745	2	sPLLEEVR	NA		567	574	25.8	5.2e-05	102250	Hypothetical protein
Q59P09	Q59P09_CANAL	583.291	3	GALSAItAPVVGNGNNGR	0.031	GALSAItAPVVGNGNNGR	98	115	27.5	7.2e-05	102250	Hypothetical protein
Q59P09	Q59P09_CANAL	517.228	2	FSsVADATR	0.005		148	156	21.9	0.043	102250	Hypothetical protein
Q59P13	Q59P13_CANAL	855.003	3	GEIDNNDIPsESEYETDGEEIK	0.031	GEIDNNDIPsESEYETDGEEIK	440	461	49.1	3.6e-08	54833.6	Hypothetical protein MAK11
Q59P13	Q59P13_CANAL	581.287	2	FTSLsQITGK	0.032	FTSLsQITGK	430	439	40.1	2.6e-06	54833.6	Hypothetical protein MAK11
Q59P13	Q59P13_CANAL	881.665	3	GEIDNNDIPsESEYEtDGEEIK			440	461	45.3	1.7e-05	54833.6	Hypothetical protein MAK11
Q59P13	Q59P13_CANAL	659.329	2	RFtSLSQITGK	0.003		429	439	34.1	0.00012	54833.6	Hypothetical protein MAK11
Q59P13	Q59P13_CANAL	581.281	2	FtSLSQITGK	0.029	FtSLSQITGK	430	439	34	0.00012	54833.6	Hypothetical protein MAK11
Q59P16	Q59P16_CANAL	692.658	3	TNsSEELQQLYDNLVDK	0		514	530	50.5	2.1e-07	69376.6	Potential xylulokinase Xks1p
Q59P40	Q59P40_CANAL	701.302	2	PsPDLTDPPSAPK	0.039	PsPDLTDPPSAPK	1	14	40.5	3.8e-07	58824.4	Hypothetical protein AVT12
Q59P40	Q59P40_CANAL	701.311	2	PSPDLTDPPsAPK	0.042	PsPDLTDPPSAPK	1	14	20.3	0.023	58824.4	Hypothetical protein AVT12
Q59P41	Q59P41_CANAL	725.303	3	TNADsQGNTSTELSDVPETK	0.011		807	826	41.3	0.00011	122204	Hypothetical protein
Q59P41	Q59P41_CANAL	622.963	3	NAVYSERPVLYSSSsK	0.028	NAVYSERPVLYSSSsK	393	408	24.8	0.0023	122204	Hypothetical protein
Q59P41	Q59P41_CANAL	531.903	3	IYHNSYsEPTFR	0		932	943	24.4	0.011	122204	Hypothetical protein
Q59P41	Q59P41_CANAL	621.764	4	STDHPNMYQQYDHHStSSLR	0		750	769	22.6	0.013	122204	Hypothetical protein
Q59P41	Q59P41_CANAL	719.63	3	NVYIGIKtANSsALDSSEK			629	647	19.8	0.029	122204	Hypothetical protein
Q59P43	Q59P43_CANAL	520.726	2	HLtGEFEK	NA		27	34	26.7	0.00028	24314.1	RAN-like GTP binding protein
Q59P52	Q59P52_CANAL	538.934	3	SVQsLVDLVNDFAK	0.005		376	389	40.1	1.3e-05	43005.3	Hypothetical protein SER1
Q59P91	Q59P91_CANAL	619.763	2	SGsMHLDGNLK			191	201	52.1	2.5e-09	80971.4	Hypothetical protein
Q59P91	Q59P91_CANAL	799.377	2	SsVVMLNPVTEITK	0		643	656	35.4	1.9e-06	80971.4	Hypothetical protein
Q59P91	Q59P91_CANAL	600.268	2	NQTVTSsPTGK	0		555	565	36.7	2.4e-06	80971.4	Hypothetical protein
Q59P91	Q59P91_CANAL	656.667	3	NTTATEQLTTSKPRsPR	0		350	366	31.4	1.9e-05	80971.4	Hypothetical protein
Q59P91	Q59P91_CANAL	873.37	2	LGDSQGYQtPSNVGSR	0.001		173	188	39.3	8.4e-05	80971.4	Hypothetical protein
Q59P91	Q59P91_CANAL	748.966	3	qYTNIPNDsDPsIAEPNAR			228	246	34.1	0.0002	80971.4	Hypothetical protein
Q59P91	Q59P91_CANAL	627.761	2	SGsmHLDGNLK	0.002		191	201	28.8	0.00027	80971.4	Hypothetical protein
Q59P91	Q59P91_CANAL	722.308	3	qYTNIPNDsDPSIAEPNAR	0.008		228	246	34.9	0.0006	80971.4	Hypothetical protein
Q59P91	Q59P91_CANAL	727.977	3	QYTNIPNDsDPSIAEPNAR	0.025	QYTNIPNDsDPSIAEPNAR	228	246	30.6	0.0023	80971.4	Hypothetical protein
Q59P91	Q59P91_CANAL	619.594	3	DYQEDPFHNRNsVR	0.095	DYQEDPFHNRNsVR	106	119	24.7	0.0025	80971.4	Hypothetical protein
Q59P91	Q59P91_CANAL	727.985	3	QYTNIPNDSDPsIAEPNAR	0.018		228	246	27.8	0.012	80971.4	Hypothetical protein
Q59P91	Q59P91_CANAL	526.767	2	FKPAGsIPR	NA		660	668	22.6	0.026	80971.4	Hypothetical protein
Q59P92	Q59P92_CANAL	844.719	3	tPREsISLQESEANNIVESLR			284	304	40.1	2.5e-05	62689	Potential transmembrane protein
Q59P94	Q59P94_CANAL	673.298	2	KNsTLKsIsK			146	155	20.5	0.0087	99268.9	Hypothetical protein FZO1
Q59P94	Q59P94_CANAL	694.655	3	ISLKSGHGDNSNtMANLDK	0.024	ISLKSGHGDNsNTMANLDK	173	191	19.8	0.023	99268.9	Hypothetical protein FZO1
Q59P96	Q59P96_CANAL	690.287	2	DHAQsLTQDER	0.044	DHAQsLTQDER	250	260	35.8	6.3e-06	31776.2	Hypothetical protein
Q59P98	Q59P98_CANAL	713.332	2	GTIGGVIPNSSsTR	0.001		219	232	24.5	0.00055	31287.1	Hypothetical protein
Q59PA1	Q59PA1_CANAL	832.833	2	sDTEESNDYVAQVK	0.024	sDTEESNDYVAQVK	625	638	40.3	4.6e-06	80997.4	Likely ferric reductase (Repressed by TUP1 protein 2)
Q59PA6	Q59PA6_CANAL	732.338	3	SPsILEGEQLQYFHDPVR	0.016		127	144	43.8	2.7e-08	86518.2	Hypothetical protein
Q59PA6	Q59PA6_CANAL	620.302	2	sLNLNFPQVK	NA		392	401	39	5e-06	86518.2	Hypothetical protein
Q59PA6	Q59PA6_CANAL	611.786	2	NLVLPNsTER	0.004		193	202	24.2	0.0023	86518.2	Hypothetical protein
Q59PA6	Q59PA6_CANAL	529.876	3	EAsTYSVNDNDHR	0.007		180	192	23.6	0.0024	86518.2	Hypothetical protein
Q59PD2	Q59PD2_CANAL	493.56	3	SAsHHLNDFAATK	0.036	SAsHHLNDFAATK	161	173	45.9	4.9e-07	164442	Hypothetical protein SPA2
Q59PD2	Q59PD2_CANAL	457.237	2	GSIAsLASK	0.015		953	961	31.2	1.2e-06	164442	Hypothetical protein SPA2
Q59PD2	Q59PD2_CANAL	523.725	2	sVDEFLEK	NA		424	431	37	6.6e-06	164442	Hypothetical protein SPA2
Q59PD2	Q59PD2_CANAL	614.264	3	HIESSQSDATIsDNEK	0.206	HIESSQSDATIsDNEK	1160	1175	34	2.5e-05	164442	Hypothetical protein SPA2
Q59PD2	Q59PD2_CANAL	693.005	3	KSTHNVAFNDNPISIsPR	0.006		735	752	33.8	3.3e-05	164442	Hypothetical protein SPA2
Q59PD2	Q59PD2_CANAL	875.992	3	DTDQSFDNDQDDsFETAYTFGK	0.069	DTDQSFDNDQDDsFETAYTFGK	891	912	34.9	3.3e-05	164442	Hypothetical protein SPA2
Q59PD2	Q59PD2_CANAL	632.281	3	KTsLDSSEDKYASPMR	0.098	KTSLDSsEDKYASPMR	875	890	31.5	6.1e-05	164442	Hypothetical protein SPA2
Q59PD2	Q59PD2_CANAL	437.551	3	KsPGQDKVPFK	NA		1045	1055	32.8	8.3e-05	164442	Hypothetical protein SPA2
Q59PD2	Q59PD2_CANAL	575.721	2	EDVPSSPsPR	0.022	EDVPSsPSPR	1035	1044	30	0.0001	164442	Hypothetical protein SPA2
Q59PD2	Q59PD2_CANAL	669.295	3	qFEsPQREDVPSSPSPR	0.533	qFEsPQREDVPSSPSPR	1028	1044	25.1	0.0013	164442	Hypothetical protein SPA2
Q59PD2	Q59PD2_CANAL	770.374	3	LETIQLsPGSTSNNPSTLELK	0.019		432	452	27.5	0.009	164442	Hypothetical protein SPA2
Q59PD2	Q59PD2_CANAL	522.253	2	NYsPIKNK	0.024	NYsPIKNK	974	981	22.4	0.012	164442	Hypothetical protein SPA2
Q59PD2	Q59PD2_CANAL	534.243	2	sNAIARDIK	NA		467	475	21.1	0.013	164442	Hypothetical protein SPA2
Q59PD2	Q59PD2_CANAL	583.244	3	SmsNSDENLKEIER	0.024	SmsNSDENLKEIER	359	372	23.6	0.021	164442	Hypothetical protein SPA2
Q59PD2	Q59PD2_CANAL	390.546	3	KKGsIASLASK	0.134	KKGsIASLASK	951	961	16.6	0.033	164442	Hypothetical protein SPA2
Q59PD2	Q59PD2_CANAL	401.185	2	NYsPIK	0.029	NYsPIK	974	979	19.4	0.044	164442	Hypothetical protein SPA2
Q59PE4	Q59PE4_CANAL	464.22	2	AGtQVMLK	NA		13	20	31	3e-05	39357.5	Hypothetical protein RVS99
Q59PE5	Q59PE5_CANAL	686.298	2	IDsTESVGELNK	0.02		868	879	44.9	2e-06	107373	Hypothetical protein
Q59PE5	Q59PE5_CANAL	726.283	2	IDsTEsVGELNK			868	879	39.8	2.3e-06	107373	Hypothetical protein
Q59PE5	Q59PE5_CANAL	586.272	2	SNsVKSDNIK	0.002		427	436	40.2	4.6e-06	107373	Hypothetical protein
Q59PE5	Q59PE5_CANAL	768.335	2	DGNSSFTLsPQFR	0.076	DGNSSFTLsPQFR	745	757	30.8	3.8e-05	107373	Hypothetical protein
Q59PE5	Q59PE5_CANAL	456.731	2	LTTsPSVK	0.009		860	867	36.4	9.8e-05	107373	Hypothetical protein
Q59PE5	Q59PE5_CANAL	855.382	2	SStTLSFWSVGTDNK	0.009		443	457	30.7	0.00011	107373	Hypothetical protein
Q59PE5	Q59PE5_CANAL	628.943	3	SSSNNNNNSsIHTITSK	0.003		789	805	25.1	0.017	107373	Hypothetical protein
Q59PE8	Q59PE8_CANAL	629.639	3	AELEAAAAAAAAPSSsPPPK	0.007		893	912	44.6	6.7e-08	106064	Hypothetical protein RPG1
Q59PE8	Q59PE8_CANAL	672.341	3	AELEAAAAAAAAPsSSPPPKK	0		893	913	37.8	2.8e-06	106064	Hypothetical protein RPG1
Q59PE8	Q59PE8_CANAL	724.363	3	KRAELEAAAAAAAAPSSsPPPK	0		891	912	34	1.5e-05	106064	Hypothetical protein RPG1
Q59PE8	Q59PE8_CANAL	681.672	3	RAELEAAAAAAAAPSsSPPPK	0		892	912	31.1	4.4e-05	106064	Hypothetical protein RPG1
Q59PE8	Q59PE8_CANAL	724.377	3	RAELEAAAAAAAAPsSSPPPKK	0		892	913	28.4	0.0019	106064	Hypothetical protein RPG1
Q59PG7	Q59PG7_CANAL	746.324	2	qFELGLHGsPESK	0.117	qFELGLHGsPESK	344	356	44.2	1.3e-07	44467.6	Hypothetical protein
Q59PG7	Q59PG7_CANAL	503.569	3	QFELGLHGsPESK	0.116	QFELGLHGsPESK	344	356	36.8	5.8e-05	44467.6	Hypothetical protein
Q59PG7	Q59PG7_CANAL	546.264	3	KQFELGLHGsPESK	0.047	KQFELGLHGsPESK	343	356	38.1	9.3e-05	44467.6	Hypothetical protein
Q59PG8	Q59PG8_CANAL	850.333	2	TSTtPPTSPEEDTEK	0.004		322	336	34.6	1.5e-05	83805	Hypothetical protein UBP10
Q59PG9	Q59PG9_CANAL	621.306	3	SsGTNGNINATLLNHLR	0		192	208	45.3	1e-08	29885	Hypothetical protein
Q59PH5	Q59PH5_CANAL	711.799	2	EGtNFDLNGTFK	0.303	EGtNFDLNGTFK	585	596	37.3	1.5e-06	82346.4	Hypothetical protein VTC4
Q59PH5	Q59PH5_CANAL	462.721	2	sICVPIR	NA		604	610	23.2	0.00016	82346.4	Hypothetical protein VTC4
Q59PH5	Q59PH5_CANAL	555.277	2	GKsICVPIR	NA		602	610	27.4	0.002	82346.4	Hypothetical protein VTC4
Q59PN3	Q59PN3_CANAL	769.321	3	TASKPTsSDADDEPTTGTTTDK	0.013		76	97	42.5	1.4e-06	41095.4	Hypothetical protein (Hypothetical protein CaJ7.0389)
Q59PN8	Q59PN8_CANAL	609.298	2	KGsIVSAFSNK	0.065	KGsIVSAFSNK	148	158	37	4.9e-07	68860.4	Hypothetical protein (Hypothetical protein CaJ7.0394)
Q59PN8	Q59PN8_CANAL	449.234	3	KGsIVSAFSNKK	0.077	KGsIVSAFSNKK	148	159	25.4	4.7e-05	68860.4	Hypothetical protein (Hypothetical protein CaJ7.0394)
Q59PN8	Q59PN8_CANAL	458.57	3	RKGsIVSAFSNK	0.258	RKGsIVSAFSNK	147	158	23.5	0.00021	68860.4	Hypothetical protein (Hypothetical protein CaJ7.0394)
Q59PR7	Q59PR7_CANAL	733.662	3	NENADINAEQAMNELLSsR	0.029	NENADINAEQAMNELLSsR	618	636	51	6.3e-08	86068.2	Hypothetical protein
Q59PR7	Q59PR7_CANAL	965.435	2	IMGISNEEAVDStSLVGK	0.003		658	675	31	0.0014	86068.2	Hypothetical protein
Q59PS9	Q59PS9_CANAL	661.652	3	RAssVEPADLNNIPVIK			320	336	38.1	6.5e-06	59042.8	Hypothetical protein
Q59PS9	Q59PS9_CANAL	634.985	3	RAsSVEPADLNNIPVIK	0.001		320	336	27.5	0.0042	59042.8	Hypothetical protein
Q59PT0	Q59PT0_CANAL	558.283	3	Acetyl-SLsDKELFELNKK	0.011		1	14	30.3	0.00011	57224.1	Hypothetical protein VMA2
Q59PT0	Q59PT0_CANAL	772.858	2	Acetyl-sLSDKELFELNK	0.003		1	13	24.2	0.018	57224.1	Hypothetical protein VMA2
Q59PT2	Q59PT2_CANAL	639.783	2	ARSVLSGsVsR			4	14	26.3	0.0088	85926.1	Potential mitochondrial aconitase
Q59PT2	Q59PT2_CANAL	422.872	3	DLPQsGFIPGR	NA		535	545	19.4	0.038	85926.1	Potential mitochondrial aconitase
Q59PU0	Q59PU0_CANAL	738.335	3	AAsPAPGSNPPPTSAPPSLSSSR	0.067	AAsPAPGSNPPPTSAPPSLSSSR	454	476	32.9	1.5e-05	57885	Hypothetical protein GYP6
Q59PU0	Q59PU0_CANAL	593.253	3	LDSDSVFYHSGDLsR	0.002		90	104	31.5	0.00019	57885	Hypothetical protein GYP6
Q59PU1	Q59PU1_CANAL	709.61	3	HEKDPILDsEDEDDENF	NA		112	128	32.5	6e-05	14369.8	Hypothetical protein
Q59PU7	Q59PU7_CANAL	445.533	3	KFEDNtPEFK	NA		117	126	24.8	0.021	74602.3	Hypothetical protein POL12
Q59PU8	Q59PU8_CANAL	657.977	3	VEEIDSTKENtEEVAAK	0.001		268	284	41.7	6.7e-06	37504.2	Hypothetical protein LHP1
Q59PU8	Q59PU8_CANAL	657.963	3	VEEIDsTKENTEEVAAK	0.009		268	284	36.5	2.5e-05	37504.2	Hypothetical protein LHP1
Q59PU8	Q59PU8_CANAL	409.185	3	RNsFNENHK	NA		222	230	24.3	0.0015	37504.2	Hypothetical protein LHP1
Q59PV1	Q59PV1_CANAL	524.584	3	LNDFKDPTDsVIK	0.001		747	759	26.3	0.012	106926	Hypothetical protein IST2
Q59PV2	Q59PV2_CANAL	649.989	3	SIEKPLGsPTETVHSASK	0.015		106	123	42.6	5.3e-09	104531	Hypothetical protein
Q59PV2	Q59PV2_CANAL	848.36	2	qVsSNVLENEIGTDK	0.002		464	478	46.8	8.4e-07	104531	Hypothetical protein
Q59PV2	Q59PV2_CANAL	519.698	2	sLDsTVTR			695	702	35.3	1.1e-06	104531	Hypothetical protein
Q59PV2	Q59PV2_CANAL	785.338	3	VETDNNDGGSNNAPVETTsPKK	0.005		84	105	42.6	1.8e-06	104531	Hypothetical protein
Q59PV2	Q59PV2_CANAL	851.883	2	ESVPPASEPPTsPISK	0.216	ESVPPAsEPPTSPISK	404	419	39.2	2.1e-06	104531	Hypothetical protein
Q59PV2	Q59PV2_CANAL	715.985	3	DINAEIEGAGYEADLsEAAK	0.094	DINAEIEGAGYEADLsEAAK	485	504	50.4	4.1e-06	104531	Hypothetical protein
Q59PV2	Q59PV2_CANAL	772.012	3	AAtDFPSLVSSNEEENAPTVR	0.033	AAtDFPSLVSSNEEENAPTVR	673	693	38.4	1.1e-05	104531	Hypothetical protein
Q59PV2	Q59PV2_CANAL	798.669	3	AATDFPSLVssNEEENAPTVR			673	693	39.8	2.8e-05	104531	Hypothetical protein
Q59PV2	Q59PV2_CANAL	638.314	3	IATHGTGDSIHTPTsPIK	0		259	276	28	5.2e-05	104531	Hypothetical protein
Q59PV2	Q59PV2_CANAL	638.308	3	IATHGTGDSIHtPTSPIK	0.043	IATHGTGDSIHtPTSPIK	259	276	28.4	6.9e-05	104531	Hypothetical protein
Q59PV2	Q59PV2_CANAL	742.646	3	VETDNNDGGSNNAPVETTsPK	0.003		84	104	35	0.00012	104531	Hypothetical protein
Q59PV2	Q59PV2_CANAL	479.739	2	sLDSTVTR	0.391	sLDSTVTR	695	702	29.1	0.00079	104531	Hypothetical protein
Q59PV2	Q59PV2_CANAL	638.302	3	IATHGtGDSIHTPTSPIK	0.009		259	276	26	0.0025	104531	Hypothetical protein
Q59PV2	Q59PV2_CANAL	519.776	4	KSIEKPLGSPtETVHSASK	0.018		105	123	23.2	0.0082	104531	Hypothetical protein
Q59PV2	Q59PV2_CANAL	825.33	3	AAtDFPSLVssNEEENAPTVR			673	693	26.6	0.0097	104531	Hypothetical protein
Q59PX6	Q59PX6_CANAL	785.338	3	VETDNNDGGSNNAPVETTsPKK	0.005		84	105	42.6	1.8e-06	39225.6	Hypothetical protein
Q59PX6	Q59PX6_CANAL	612.274	2	SPtETVHSASK	0.003		113	123	38.9	2.3e-06	39225.6	Hypothetical protein
Q59PX6	Q59PX6_CANAL	638.314	3	IATHGTGDSIHTPTsPIK	0		259	276	28	5.2e-05	39225.6	Hypothetical protein
Q59PX6	Q59PX6_CANAL	638.308	3	IATHGTGDSIHtPTSPIK	0.043	IATHGTGDSIHtPTSPIK	259	276	28.4	6.9e-05	39225.6	Hypothetical protein
Q59PX6	Q59PX6_CANAL	742.646	3	VETDNNDGGSNNAPVETTsPK	0.003		84	104	35	0.00012	39225.6	Hypothetical protein
Q59PX6	Q59PX6_CANAL	638.302	3	IATHGtGDSIHTPTSPIK	0.009		259	276	26	0.0025	39225.6	Hypothetical protein
Q59PZ1	Q59PZ1_CANAL	558.736	2	GVSTFsPEGR	0.056	GVSTFsPEGR	11	20	34.1	3.9e-07	27735.5	Likely proteasome subunit Pup2
Q59PZ1	Q59PZ1_CANAL	793.324	2	ELNAQATDEDtVIS	0.031	ELNAQATDEDtVIS	242	255	20.6	0.0014	27735.5	Likely proteasome subunit Pup2
Q59Q05	Q59Q05_CANAL	635.286	2	sISEQSSPINK	0.008		199	209	34	2e-07	49112.8	Hypothetical protein
Q59Q27	Q59Q27_CANAL	790.382	2	NPsITALEGEIEVK	0.026	NPsITALEGEIEVK	182	195	44.7	3.2e-07	115980	Potential SRPK1-like protein kinase
Q59Q27	Q59Q27_CANAL	940.893	2	TLsTTSNSSQSSYFYK	0.02		697	712	39.1	3e-06	115980	Potential SRPK1-like protein kinase
Q59Q27	Q59Q27_CANAL	544.237	2	ASLLSNCsR	0.025	ASLLSNCsR	652	660	43.2	5.3e-06	115980	Potential SRPK1-like protein kinase
Q59Q27	Q59Q27_CANAL	590.281	2	sMLSLGLHNK	0.138	sMLSLGLHNK	452	461	26.9	0.00015	115980	Potential SRPK1-like protein kinase
Q59Q27	Q59Q27_CANAL	405.859	3	KAsLLSNCSR	0.131	KAsLLSNCSR	651	660	30	0.00017	115980	Potential SRPK1-like protein kinase
Q59Q27	Q59Q27_CANAL	430.721	2	KASsLFK	0.007		94	100	26.2	0.00061	115980	Potential SRPK1-like protein kinase
Q59Q27	Q59Q27_CANAL	535.261	2	SLNSQsLIK	0.004		563	571	24.3	0.007	115980	Potential SRPK1-like protein kinase
Q59Q34	Q59Q34_CANAL	708.344	2	SStISQINTISGK	0.001		591	603	38.5	3.9e-06	136962	Potential ER membrane P-type ATPase
Q59Q34	Q59Q34_CANAL	626.806	2	yLFHsKIGK			134	142	26.2	0.032	136962	Potential ER membrane P-type ATPase
Q59Q37	Q59Q37_CANAL	771.657	3	DPANSAETStPTSNDTDLQLR	0.003		304	324	37.5	1.3e-05	45684.3	Hypothetical protein
Q59Q37	Q59Q37_CANAL	581.596	3	HHFIQNASPANsSPR	0.008		265	279	26.3	0.0073	45684.3	Hypothetical protein
Q59Q38	PNG1_CANAL	603.925	3	tPPIKsPSSSSVDYGK			1	17	22.9	0.0027	45840.3	Peptide-N(4)-(N-acetyl-beta-glucosaminyl)asparagine amidase (EC 3.5.1.52) (PNGase) (Peptide:N-glycanase 1)
Q59Q40	Q59Q40_CANAL	570.92	3	SSsVVANDIHCLNSK	0.01		438	452	37.3	1.1e-05	50944.3	Potential phospholipid-translocating ATPase
Q59Q41	Q59Q41_CANAL	836.011	3	TNNDIVsDNEEStLQGQNIVR			435	455	33.9	0.00076	52290	Potential phospholipid-translocating ATPase
Q59Q44	Q59Q44_CANAL	812.021	3	STASNITmTSASSPQGSPSQSsPK	0		89	112	41.9	8.3e-08	94688.5	Probable PP2A regulatory subunit B
Q59Q44	Q59Q44_CANAL	623.275	2	NLMTNTSGsLK	0.013		59	69	47.5	3.3e-07	94688.5	Probable PP2A regulatory subunit B
Q59Q44	Q59Q44_CANAL	833.338	3	STASNITMTSASsPQGsPSQSSPK			89	112	39.6	1.6e-06	94688.5	Probable PP2A regulatory subunit B
Q59Q44	Q59Q44_CANAL	859.994	3	STASNITMTSAsSPQGsPSQSsPK			89	112	34.5	0.0002	94688.5	Probable PP2A regulatory subunit B
Q59Q44	Q59Q44_CANAL	675.632	3	SsSPSSLSLNTSSSSSQSSK	0.008		39	58	28.6	0.0011	94688.5	Probable PP2A regulatory subunit B
Q59Q44	Q59Q44_CANAL	806.683	3	STASNITMTSASSPQGSPSQSsPK	0		89	112	26.5	0.002	94688.5	Probable PP2A regulatory subunit B
Q59Q44	Q59Q44_CANAL	593.609	3	FEPtSSDRYQEIVK	0		256	269	25.3	0.0058	94688.5	Probable PP2A regulatory subunit B
Q59Q73	Q59Q73_CANAL	848.707	3	LSQYAPSVLSTYsDDSDYEAPR	0.005		1663	1684	34.9	5.1e-06	348793	Hypothetical protein VPS13
Q59Q73	Q59Q73_CANAL	716.629	3	HQGVVEDTSNsEEFQFSK	0.03	HQGVVEDTSNsEEFQFSK	1640	1657	32.8	0.00042	348793	Hypothetical protein VPS13
Q59Q73	Q59Q73_CANAL	769.309	2	qQsRTsITTSSAK			1490	1502	26.8	0.00077	348793	Hypothetical protein VPS13
Q59Q73	Q59Q73_CANAL	769.312	2	qQSRtsITTSSAK			1490	1502	26.9	0.0011	348793	Hypothetical protein VPS13
Q59Q74	Q59Q74_CANAL	643.96	3	IKsETSTNNNTPNMGNK	0.011		115	131	26	0.00065	21538.7	Hypothetical protein
Q59Q74	Q59Q74_CANAL	464.206	2	TtPVMGNK	0.041	TtPVMGNK	132	139	20.8	0.0047	21538.7	Hypothetical protein
Q59Q76	Q59Q76_CANAL	753.298	2	DTDsEAEIAEAFK	0.038	DTDsEAEIAEAFK	102	114	50.3	9.2e-09	19284.9	Likely calmodulin
Q59Q76	Q59Q76_CANAL	753.307	2	DtDSEAEIAEAFK	0.026	DTDsEAEIAEAFK	102	114	47.1	4.8e-08	19284.9	Likely calmodulin
Q59Q76	Q59Q76_CANAL	594.255	3	mKDTDsEAEIAEAFK	0.01		100	114	38.5	2e-06	19284.9	Likely calmodulin
Q59Q76	Q59Q76_CANAL	615.579	3	MKDtDsEAEIAEAFK			100	114	34.5	3.5e-06	19284.9	Likely calmodulin
Q59Q76	Q59Q76_CANAL	588.923	3	MKDTDsEAEIAEAFK	0.006		100	114	44.9	2.4e-05	19284.9	Likely calmodulin
Q59Q76	Q59Q76_CANAL	532.265	2	HVLTsIGEK	0.028	HVLtSIGEK	131	139	28.9	0.00012	19284.9	Likely calmodulin
Q59Q76	Q59Q76_CANAL	513.553	3	EAFsLFDKDSDGK	0.084	EAFsLFDKDSDGK	38	50	25.6	0.0016	19284.9	Likely calmodulin
Q59Q76	Q59Q76_CANAL	513.552	3	EAFSLFDKDsDGK	0.084	EAFsLFDKDSDGK	38	50	22	0.011	19284.9	Likely calmodulin
Q59Q76	Q59Q76_CANAL	760.367	3	HVLTSIGEKLsDADVDQMIK	0.016		131	150	25.5	0.024	19284.9	Likely calmodulin
Q59Q82	Q59Q82_CANAL	773.313	2	LCQDSTDDsPLSK	0.059	LCQDSTDDsPLSK	634	646	48.2	2.3e-07	78830.4	Hypothetical protein
Q59Q82	Q59Q82_CANAL	750.988	3	LCQDSTDDSPLSKsPNHNR	0.014		634	652	43.8	9.3e-07	78830.4	Hypothetical protein
Q59Q82	Q59Q82_CANAL	933.443	2	sLDTLDTNLIPETPTR	0.001		653	668	38.5	9.6e-06	78830.4	Hypothetical protein
Q59Q82	Q59Q82_CANAL	973.415	2	sLDTLDTNLIPEtPTR			653	668	26.8	0.00018	78830.4	Hypothetical protein
Q59Q82	Q59Q82_CANAL	777.641	3	LCQDSTDDsPLSKsPNHNR			634	652	31.7	0.00067	78830.4	Hypothetical protein
Q59Q82	Q59Q82_CANAL	904.049	3	NTNsPFVIDsPANHSNSLSTSVFD			669	692	24.9	0.0015	78830.4	Hypothetical protein
Q59Q82	Q59Q82_CANAL	877.397	3	NTNSPFVIDSPANHSNsLSTSVFD	0.005		669	692	26.5	0.0018	78830.4	Hypothetical protein
Q59Q86	Q59Q86_CANAL	514.213	2	Acetyl-SsPTSSPSR	0		1	10	29.8	0.00029	125904	Vacuolar peripheral membrane protein
Q59QA6	Q59QA6_CANAL	552.23	2	Acetyl-SsPTYSPSR	0		1	10	24.8	0.0011	126084	Vacuolar peripheral membrane protein
Q59QB1	Q59QB1_CANAL	692.317	2	sQIDPAAFVLDK	NA		178	189	37.2	2.5e-05	81938.1	Potential guanine nucleotide exchange factor eIF-2B epsilon subunit
Q59QB1	Q59QB1_CANAL	547.605	3	tRSQIDPAAFVLDK	0.002		176	189	36.2	4.3e-05	81938.1	Potential guanine nucleotide exchange factor eIF-2B epsilon subunit
Q59QB1	Q59QB1_CANAL	628.636	3	sQIDPAAFVLDKETNR	0.49	sQIDPAAFVLDKETNR	178	193	26	0.00015	81938.1	Potential guanine nucleotide exchange factor eIF-2B epsilon subunit
Q59QB4	Q59QB4_CANAL	568.773	2	Acetyl-sDLPLLGGSR	0.319	MsDLPLLGGSR	1	11	29.2	4.6e-05	44561.5	Hypothetical protein VCX1
Q59QB4	Q59QB4_CANAL	802.361	3	tHKELFEEDQsADAILNER			224	242	25.2	0.016	44561.5	Hypothetical protein VCX1
Q59QB7	Q59QB7_CANAL	580.268	2	SDtLFLGAQK	0.007		7	16	23.8	0.0018	60067.4	Potential cytosolic chaperonin CCT ring complex subunit Tcp1
Q59QB9	Q59QB9_CANAL	785.359	2	NtISVNNLADDVSK	0.068	NtISVNNLADDVSK	64	77	47.1	3.4e-09	79395.6	Likely protein kinase
Q59QB9	Q59QB9_CANAL	476.912	3	RLsIEDFDLLK	NA		385	395	33.5	2.1e-06	79395.6	Likely protein kinase
Q59QB9	Q59QB9_CANAL	913.401	3	TNtFCGTPEYLAPELLLNQGYTR	0.021	tNTFCGTPEYLAPELLLNQGYTR	546	568	41.3	2.7e-06	79395.6	Likely protein kinase
Q59QB9	Q59QB9_CANAL	742.994	3	qSTDSRNtISVNNLADDVSK	0.002		58	77	35.7	1.8e-05	79395.6	Likely protein kinase
Q59QB9	Q59QB9_CANAL	682.977	3	LTVAADRsPEKsLGSNNK			78	95	29.4	0.0006	79395.6	Likely protein kinase
Q59QB9	Q59QB9_CANAL	519.611	3	KRLsIEDFDLLK	NA		384	395	22.2	0.02	79395.6	Likely protein kinase
Q59QC2	EAF6_CANAL	506.917	3	KLtTLEDSIYQK	0		84	95	23.8	4.9e-05	23209.7	Chromatin modification-related protein EAF6
Q59QC9	Q59QC9_CANAL	683.019	3	GMPLQETSPNIINKsPIK	0.033	GMPLQETSPNIINKsPIK	28	45	30	1.3e-05	14368.4	Hypothetical protein
Q59QC9	Q59QC9_CANAL	554.28	2	LAGsPVSLQR	0.266	LAGsPVSLQR	58	67	32.3	7.2e-05	14368.4	Hypothetical protein
Q59QD3	Q59QD3_CANAL	681.793	2	VsFDNLDVFAR	NA		33	43	34.8	0.00032	109881	Hypothetical protein GCV2
Q59QH2	Q59QH2_CANAL	741.632	3	DDAEDsSLEIDPIDYmNGK	0.037	DDAEDsSLEIDPIDYmNGK	92	110	45.7	1.2e-06	38274.1	Hypothetical protein
Q59QH8	Q59QH8_CANAL	867.832	2	IDFENDDDNsTELK	0.004		368	381	44.4	1.3e-06	98048.3	Hypothetical protein
Q59QH8	Q59QH8_CANAL	560.619	3	SNsQSQVVSIPTKPK	0.007		128	142	35.2	7.9e-06	98048.3	Hypothetical protein
Q59QH8	Q59QH8_CANAL	437.226	2	sGLIYIK	0.247	sGLIYIK	73	79	26.2	0.00015	98048.3	Hypothetical protein
Q59QH8	Q59QH8_CANAL	576.746	2	qNSsQTTVPK	0.01		42	51	30.7	0.0005	98048.3	Hypothetical protein
Q59QH8	Q59QH8_CANAL	650.316	2	RLsFIEDIAR	NA		354	363	20.6	0.011	98048.3	Hypothetical protein
Q59QH8	Q59QH8_CANAL	581.756	2	GGGSsLSSSTSR	0.004		155	166	19.4	0.042	98048.3	Hypothetical protein
Q59QJ0	Q59QJ0_CANAL	491.732	2	MHsSLISK	0.009		64	71	37.3	5.5e-07	63347.2	Hypothetical protein
Q59QJ0	Q59QJ0_CANAL	499.726	2	mHsSLISK	0.013		64	71	36.8	2.4e-06	63347.2	Hypothetical protein
Q59QJ0	Q59QJ0_CANAL	736.817	2	IsFESYYVEQK	0.034	IsFESYYVEQK	194	204	35.1	6.2e-05	63347.2	Hypothetical protein
Q59QJ0	Q59QJ0_CANAL	679.962	3	LDTRIsFEsYYVEQK			190	204	24.9	0.0059	63347.2	Hypothetical protein
Q59QJ0	Q59QJ0_CANAL	679.962	3	LDtRIsFESYYVEQK			190	204	21.8	0.046	63347.2	Hypothetical protein
Q59QJ2	Q59QJ2_CANAL	679.992	3	SPLPPQPTNDSVSLGsPHK	0.041	SPLPPQPTNDSVSLGsPHK	508	526	33.9	1.9e-07	182576	Possible bud neck localizing protein phosphatase subunit Bni4p
Q59QJ2	Q59QJ2_CANAL	927.727	3	FMQSsTTPSSPLANYHFDNDSINK	0		1168	1191	34.2	1e-05	182576	Possible bud neck localizing protein phosphatase subunit Bni4p
Q59QJ2	Q59QJ2_CANAL	553.232	2	SNtLNDFSK	0.032	SNtLNDFSK	569	577	36.7	5.6e-05	182576	Possible bud neck localizing protein phosphatase subunit Bni4p
Q59QJ2	Q59QJ2_CANAL	635.781	2	qNRPISMsFK	0.031	qNRPIsMSFK	1329	1338	27.8	6.8e-05	182576	Possible bud neck localizing protein phosphatase subunit Bni4p
Q59QJ2	Q59QJ2_CANAL	634.281	3	KNSNTTtSTDFHPENK	0.003		547	562	33.2	8.8e-05	182576	Possible bud neck localizing protein phosphatase subunit Bni4p
Q59QJ2	Q59QJ2_CANAL	459.7	2	sLNEFTK	0.141	sLNEFTK	45	51	24.5	0.00013	182576	Possible bud neck localizing protein phosphatase subunit Bni4p
Q59QJ2	Q59QJ2_CANAL	607.591	3	SYStPNMQMLSEQPK	0.001		639	653	33.5	0.00019	182576	Possible bud neck localizing protein phosphatase subunit Bni4p
Q59QJ2	Q59QJ2_CANAL	798.725	3	RFsGPPTSSSLIPIKPPsPIR			931	951	28.6	0.00025	182576	Possible bud neck localizing protein phosphatase subunit Bni4p
Q59QJ2	Q59QJ2_CANAL	634.276	3	KNsNTTTSTDFHPENK	0.009		547	562	33.4	0.00028	182576	Possible bud neck localizing protein phosphatase subunit Bni4p
Q59QJ2	Q59QJ2_CANAL	823.024	3	SMLTVLTNDNDSMSSSHtPPPR	0		486	507	29.7	0.0005	182576	Possible bud neck localizing protein phosphatase subunit Bni4p
Q59QJ2	Q59QJ2_CANAL	609.285	2	sESKAPLPtK			670	679	21.4	0.017	182576	Possible bud neck localizing protein phosphatase subunit Bni4p
Q59QM8	Q59QM8_CANAL	728.864	2	TTsLTEQTAILAK	0.009		1	14	44.9	3.8e-06	41721.3	Likely glutamine synthetase
Q59QM8	Q59QM8_CANAL	566.261	2	YLELsQNGK	0.09	YLELsQNGK	15	23	28.6	7.3e-06	41721.3	Likely glutamine synthetase
Q59QM8	Q59QM8_CANAL	749.865	2	Acetyl-TtSLTEQTAILAK	0		1	14	42.9	7.6e-06	41721.3	Likely glutamine synthetase
Q59QM8	Q59QM8_CANAL	609.255	3	HETGHMDtFSSGVANR	0.121	HETGHMDtFSSGVANR	297	312	33.4	0.00032	41721.3	Likely glutamine synthetase
Q59QP4	Q59QP4_CANAL	504.259	3	TTLDSLEVsPIKK	0.075	TTLDSLEVsPIKK	535	547	41.4	5.7e-07	78394.4	Hypothetical protein
Q59QP4	Q59QP4_CANAL	423.54	3	FAEDIGKsPPK	NA		182	192	30.9	9.1e-06	78394.4	Hypothetical protein
Q59QP4	Q59QP4_CANAL	511.272	3	GPVPFELKPKsPR	NA		552	564	25.9	5.8e-05	78394.4	Hypothetical protein
Q59QP4	Q59QP4_CANAL	553.251	2	AVGGQPQsPGK	NA		484	494	40.8	8.6e-05	78394.4	Hypothetical protein
Q59QS2	Q59QS2_CANAL	763.347	3	ETPAAAAAAATSAsEEPAAAPKPK	0.058	EtPAAAAAAATSASEEPAAAPKPK	235	258	26	0.0021	47537.7	Potential translation elongation factor Cam1p
Q59QS7	Q59QS7_CANAL	570.775	2	NsNGSLISIR	0.073	NsNGSLISIR	486	495	31.4	1.1e-05	140527	Potential fungal transcription factor
Q59QS7	Q59QS7_CANAL	432.89	3	RNsNGSLISIR	0.039	RNsNGSLISIR	485	495	19.6	0.026	140527	Potential fungal transcription factor
Q59QS9	Q59QS9_CANAL	815.885	2	sVAESVSSSALSEAVK	0.152	sVAESVSSSALSEAVK	312	327	51.6	9.6e-10	39557.9	Potential ubiquinol cyt-c reductase core protein 2
Q59QS9	Q59QS9_CANAL	664.325	2	IAAKEsATDLTK	0		19	30	44.3	5e-07	39557.9	Potential ubiquinol cyt-c reductase core protein 2
Q59QW5	Q59QW5_CANAL	725.818	2	qQRPGSNtPSMGK	0.033	qQRPGSNtPSMGK	595	607	29.5	3.1e-05	89794.8	Potential transcriptional regulator of filamentous growth (Transcription regulatory factor FLO8p)
Q59QW5	Q59QW5_CANAL	699.304	3	TSGQTtPNMSQPPSAGTEPK	0.006		561	580	27.7	0.0037	89794.8	Potential transcriptional regulator of filamentous growth (Transcription regulatory factor FLO8p)
Q59QW5	Q59QW5_CANAL	527.24	2	DFQPLtPR	NA		609	616	23.9	0.0054	89794.8	Potential transcriptional regulator of filamentous growth (Transcription regulatory factor FLO8p)
Q59QX3	Q59QX3_CANAL	887.057	3	SVTSFSSINNSTTsPGQHGSNGGGGGGK	0.016		445	472	44	2.2e-06	67012.2	Possible de-ubiquitination complex subunit Bre5p
Q59QX3	Q59QX3_CANAL	459.876	3	KFsGSGSGGGGGQSK	0		571	585	39.2	2.3e-05	67012.2	Possible de-ubiquitination complex subunit Bre5p
Q59QX3	Q59QX3_CANAL	549.765	2	NLNKAPsFK	NA		613	621	26.8	0.00034	67012.2	Possible de-ubiquitination complex subunit Bre5p
Q59QX5	Q59QX5_CANAL	845.381	3	DAANGIPCTTGAAPTQTNtPDVGPK	0		606	630	33	0.00047	227567	Potential mRNA deadenylase and CCR4-NOT complex subunit Cdc39p
Q59QZ9	Q59QZ9_CANAL	868.047	3	SVTSFSSINNSTTsPGQHGSNGGGGGK	0		445	471	36.6	1.2e-05	67071.2	Possible de-ubiquitination complex subunit Bre5p
Q59QZ9	Q59QZ9_CANAL	549.765	2	NLNKAPsFK	NA		614	622	26.8	0.00034	67071.2	Possible de-ubiquitination complex subunit Bre5p
Q59QZ9	Q59QZ9_CANAL	507.891	3	KFsGSGSGSGGGGGQSK	0.045	KFSGSGsGSGGGGGQSK	570	586	24.3	0.0041	67071.2	Possible de-ubiquitination complex subunit Bre5p
Q59R10	Q59R10_CANAL	462.736	2	SIsLPISK	0.067	SIsLPISK	151	158	29	2.7e-05	39907.7	Hypothetical protein
Q59R15	Q59R15_CANAL	912.831	2	qQsASsIWSTDTTNR			357	371	43.3	8e-08	118431	Potential GTP/GDP exchange factor for ARF (Hypothetical protein CaJ7.0399)
Q59R15	Q59R15_CANAL	950.91	2	qQsASSIWSTDTTNRR	0.085	qQsASSIWSTDTTNRR	357	372	42.9	1.6e-07	118431	Potential GTP/GDP exchange factor for ARF (Hypothetical protein CaJ7.0399)
Q59R15	Q59R15_CANAL	770.68	3	YTTtTSEISNFNATAQNPNR	0.002		380	399	38	3e-06	118431	Potential GTP/GDP exchange factor for ARF (Hypothetical protein CaJ7.0399)
Q59R15	Q59R15_CANAL	798.307	2	SNDtSYQDDELTK	0.001		895	907	35.7	1.5e-05	118431	Potential GTP/GDP exchange factor for ARF (Hypothetical protein CaJ7.0399)
Q59R15	Q59R15_CANAL	849.364	3	RYtTTtSEISNFNATAQNPNR			379	399	34.6	0.00027	118431	Potential GTP/GDP exchange factor for ARF (Hypothetical protein CaJ7.0399)
Q59R15	Q59R15_CANAL	587.918	3	QQsASSIWSTDTTNR	0.031	QQSASSIWsTDTTNR	357	371	19.3	0.015	118431	Potential GTP/GDP exchange factor for ARF (Hypothetical protein CaJ7.0399)
Q59R15	Q59R15_CANAL	639.95	3	QQsASSIWSTDTTNRR	0.074	QQsASSIWSTDTTNRR	357	372	19.2	0.046	118431	Potential GTP/GDP exchange factor for ARF (Hypothetical protein CaJ7.0399)
Q59R18	Q59R18_CANAL	771.35	2	LAELDLsSIEEDK	0.04	LAELDLsSIEEDK	97	109	41.6	5.3e-07	62248.4	Hypothetical protein DED81 (Hypothetical protein CaJ7.0421)
Q59R18	Q59R18_CANAL	751.707	3	LAELDLsSIEEDKSLPSAQK	0.025	LAELDLsSIEEDKSLPSAQK	97	116	41	7.3e-07	62248.4	Hypothetical protein DED81 (Hypothetical protein CaJ7.0421)
Q59R18	Q59R18_CANAL	574.25	2	SQsIYVNEK	0.019		1	10	29.5	1.9e-05	62248.4	Hypothetical protein DED81 (Hypothetical protein CaJ7.0421)
Q59R18	Q59R18_CANAL	778.36	3	LAELDLssIEEDKSLPSAQK			97	116	30.2	5.1e-05	62248.4	Hypothetical protein DED81 (Hypothetical protein CaJ7.0421)
Q59R18	Q59R18_CANAL	751.698	3	LAELDLSSIEEDKsLPSAQK	0.016		97	116	25.8	0.0023	62248.4	Hypothetical protein DED81 (Hypothetical protein CaJ7.0421)
Q59R20	Q59R20_CANAL	736.366	3	ALEQSLAQLSLATVAsPENGK	0.198	ALEQSLAQLSLATVAsPENGK	1	22	34.4	7.1e-05	77339.5	Hypothetical protein (Hypothetical protein CaJ7.0419)
Q59R20	Q59R20_CANAL	520.755	2	EVsIANLSK	0.105	EVsIANLSK	86	94	20.5	0.007	77339.5	Hypothetical protein (Hypothetical protein CaJ7.0419)
Q59R26	Q59R26_CANAL	695.631	3	SHDDVPsPPPPPSTSSSASR	0.02		510	529	31	0.00019	74692.7	Potential chromatin-associated protein (Hypothetical protein CaJ7.0414)
Q59R29	Q59R29_CANAL	545.586	3	sSVINHELIEEER	0		90	102	31.1	4.8e-05	68065.3	Potential MATE family drug/sodium antiporter (Hypothetical protein CaJ7.0409)
Q59R29	Q59R29_CANAL	480.494	4	RKsSVINHELIEEER	0		88	102	24.1	0.019	68065.3	Potential MATE family drug/sodium antiporter (Hypothetical protein CaJ7.0409)
Q59R32	Q59R32_CANAL	527.779	2	KTsITIPSK	0.085	KTSItIPSK	80	88	37	1.8e-05	35963.9	Hypothetical protein (Hypothetical protein CaJ7.0406)
Q59R32	Q59R32_CANAL	527.78	2	KTSITIPsK	0.03	KTSItIPSK	80	88	21.5	0.021	35963.9	Hypothetical protein (Hypothetical protein CaJ7.0406)
Q59R34	Q59R34_CANAL	624.938	3	GLTAAEEsDEERLNMK	0.079	GLTAAEEsDEERLNMK	555	570	33.1	0.00021	84948	Hypothetical protein
Q59R34	Q59R34_CANAL	547.784	2	QLNPVKsTK	0.001		531	539	23.6	0.00031	84948	Hypothetical protein
Q59R34	Q59R34_CANAL	645.299	3	ILSQQSSSsSSSLANTEK	0		635	652	31.4	0.0017	84948	Hypothetical protein
Q59RA0	Q59RA0_CANAL	761.354	2	EIVVEsPVDEPTK	0.31	EIVVEsPVDEPTK	703	715	43.5	1.2e-06	87605	Hypothetical protein
Q59RA2	Q59RA2_CANAL	596.945	3	SSDLSPtKTNLESTTK	0.008		6	21	43.7	7e-06	26211.9	Hypothetical protein PIS1
Q59RA6	Q59RA6_CANAL	726.863	2	LVsDEISQQLIK	0.199	LVsDEISQQLIK	544	555	47.5	9.1e-09	95505.9	Hypothetical protein
Q59RA6	Q59RA6_CANAL	726.867	2	LVSDEIsQQLIK	0.073	LVSDEIsQQLIK	544	555	44	2.9e-06	95505.9	Hypothetical protein
Q59RA6	Q59RA6_CANAL	511.737	2	RFsYLEK	0.018		123	129	30	0.0019	95505.9	Hypothetical protein
Q59RA7	Q59RA7_CANAL	478.751	2	SVKsTINK	0		347	354	32.7	6e-05	65193.8	Hypothetical protein
Q59RC1	Q59RC1_CANAL	608.261	2	HAsINSTDYK	0		148	157	34.4	1e-06	158717	Hypothetical protein TUS1
Q59RC1	Q59RC1_CANAL	591.765	2	IDDVPDLTsK	0		242	251	31.1	5.9e-06	158717	Hypothetical protein TUS1
Q59RC1	Q59RC1_CANAL	608.257	2	HASINsTDYK	0.007		148	157	32	9.4e-05	158717	Hypothetical protein TUS1
Q59RC1	Q59RC1_CANAL	685.825	2	SPsYLPEVLASK	0.011		428	439	26.6	0.00046	158717	Hypothetical protein TUS1
Q59RD4	Q59RD4_CANAL	720.671	3	NGELIDDAIVFAsKPGtPR			80	98	39.5	9e-07	57073.2	Hypothetical protein
Q59RD4	Q59RD4_CANAL	511.227	2	sVFADFQK			149	156	28.7	2.1e-05	57073.2	Hypothetical protein
Q59RD8	Q59RD8_CANAL	553.773	2	sVDALVPIGR	NA		91	100	24.8	3.7e-05	48535.1	Hypothetical protein ATP1
Q59RD8	Q59RD8_CANAL	620.787	2	SNEtGILDAIK	0.002		413	423	25	0.0048	48535.1	Hypothetical protein ATP1
Q59RH2	Q59RH2_CANAL	559.238	2	LTsPSPsIR			17	25	27.9	5.1e-06	84005.4	Potential sulfate transporter
Q59RH2	Q59RH2_CANAL	519.249	2	LTSPsPSIR	0.01		17	25	23.1	0.0068	84005.4	Potential sulfate transporter
Q59RH9	Q59RH9_CANAL	628.274	2	MPELDKLSsR	0.004		1	10	24.2	0.011	106492	Potential WD-40 repeat protein
Q59RI3	Q59RI3_CANAL	638.976	3	sKGTGSEYYYTPIQLK	0		229	244	32.9	5.5e-06	63824.3	Potential RNA Pol II transcriptional activator
Q59RI5	Q59RI5_CANAL	806.852	2	IIIDDGsQDNLAMK	NA		623	636	33.9	3.1e-05	104389	Hypothetical protein
Q59RJ3	Q59RJ3_CANAL	548.273	3	FsHEAVAGAASFAAVK	0.328	FsHEAVAGAASFAAVK	21	36	24.6	0.0025	13611	Hypothetical protein
Q59RK0	Q59RK0_CANAL	579.294	2	LLSSATTVAsK	0.003		145	155	35.4	1e-05	57745.9	Potential clathrin-associated protein AP-3 complex component
Q59RK1	Q59RK1_CANAL	573.585	3	RGtNNSGGLGSQGFMR	0.016		1015	1030	35.1	1.5e-05	117733	Hypothetical protein SRO77
Q59RK1	Q59RK1_CANAL	578.923	3	RGtNNSGGLGSQGFmR	0.011		1015	1030	34.2	3e-05	117733	Hypothetical protein SRO77
Q59RK1	Q59RK1_CANAL	578.917	3	RGTNNsGGLGSQGFmR	0.007		1015	1030	32.5	9e-05	117733	Hypothetical protein SRO77
Q59RK2	Q59RK2_CANAL	688.761	2	NIQFTNNsDED	0.056	NIQFTNNsDED	434	444	31.4	0.00015	50743.4	Hypothetical protein
Q59RK2	Q59RK2_CANAL	490.226	2	ENIPTtPK	0		5	12	18.1	0.05	50743.4	Hypothetical protein
Q59RK5	Q59RK5_CANAL	736.825	2	SsSLVEDLNTAEK	0		25	37	49.8	6.5e-09	57115.5	Hypothetical protein NOP58
Q59RK5	Q59RK5_CANAL	725.69	3	SSsLVEDLNTAEKVAEQFK	0.018		25	43	28.7	0.00054	57115.5	Hypothetical protein NOP58
Q59RK8	Q59RK8_CANAL	879.395	2	SGsAQTPQFAPVSASSR	0.021	sGSAQTPQFAPVSASSR	448	464	39.8	2.7e-07	96446.9	Likely protein kinase
Q59RK8	Q59RK8_CANAL	635.662	3	KGsFVGTAEYVSPELLK	0		223	239	35.7	5.6e-06	96446.9	Likely protein kinase
Q59RK8	Q59RK8_CANAL	753.856	2	DSsTPPPPPPLPPK	0		581	594	30.6	0.00071	96446.9	Likely protein kinase
Q59RK8	Q59RK8_CANAL	383.68	2	tPPFPK	NA		485	490	18.1	0.0039	96446.9	Likely protein kinase
Q59RK8	Q59RK8_CANAL	441.199	2	NStPNLR	0		493	499	19.3	0.015	96446.9	Likely protein kinase
Q59RL2	Q59RL2_CANAL	623.791	2	IPEVNGPsPTR	0.065	IPEVNGPsPTR	1391	1401	35.6	1.8e-05	163482	Hypothetical protein DNA2
Q59RL2	Q59RL2_CANAL	674.312	2	TQtPSVTSAFTK	0		329	340	20.6	0.019	163482	Hypothetical protein DNA2
Q59RL4	Q59RL4_CANAL	692.289	2	DPPDDsFELLR	NA		779	789	28.7	0.0015	107687	Hypothetical protein VPH1
Q59RL7	Q59RL7_CANAL	850.822	2	GMIVNGIDVNEsDEE	NA		839	853	36.1	6.6e-07	96047.1	Hypothetical protein CPH2
Q59RL9	Q59RL9_CANAL	631.966	3	RPsFGLNFLNNFTMR	0.577	RPsFGLNFLNNFTMR	59	73	40.2	3e-05	41943	Hypothetical protein
Q59RL9	Q59RL9_CANAL	637.301	3	RPsFGLNFLNNFTmR	0.46	RPsFGLNFLNNFTmR	59	73	35	3.9e-05	41943	Hypothetical protein
Q59RN2	Q59RN2_CANAL	573.27	3	sIDIDALEPDAHLTK	0.481	sIDIDALEPDAHLTK	8	22	31.8	1.8e-07	17691.9	Hypothetical protein ARC15
Q59RN2	Q59RN2_CANAL	436.171	2	VsEDWR	NA		1	7	21.9	0.00045	17691.9	Hypothetical protein ARC15
Q59RP4	Q59RP4_CANAL	598.569	3	SANDtDSSLsTISHAK			325	340	35.6	5.8e-06	46276	Potential ferric reductase
Q59RP4	Q59RP4_CANAL	571.92	3	SANDTDSsLSTISHAK	0		325	340	37.6	0.00037	46276	Potential ferric reductase
Q59RQ0	Q59RQ0_CANAL	512.752	2	NsILQIEK	NA		102	109	24.6	0.00053	101424	Hypothetical protein PIF1
Q59RQ0	Q59RQ0_CANAL	485.229	3	GQSHVYNGsPVTK	0.008		89	101	26.4	0.0027	101424	Hypothetical protein PIF1
Q59RQ6	Q59RQ6_CANAL	526.909	3	TCHAHPTLsEAFK	0.02		466	478	25	0.00042	52857.2	Likely mitochondrial matrix dihydrolipoamide dehydrogenase Lpd1p
Q59RR0	Q59RR0_CANAL	605.966	3	qLNSNVGsMHLSPLKK	0.004		569	584	27.8	0.0002	90538.1	Potential zinc finger transcription factor
Q59RR3	Q59RR3_CANAL	788.37	3	SPPtPPTSTSSPQNLLSSNQSR	0.003		444	465	48.2	2e-07	100508	Potential zinc finger protein
Q59RR3	Q59RR3_CANAL	588.274	3	SIYNELSPLTTTTsR	0		346	360	31	1.2e-06	100508	Potential zinc finger protein
Q59RR3	Q59RR3_CANAL	678.331	3	VsSFANVNNAGTNLFVNGK			256	274	23.6	0.0045	100508	Potential zinc finger protein
Q59RR4	Q59RR4_CANAL	870.863	2	ILNEsDAEENEVGNK	NA		643	657	51	1.1e-07	75475.6	Hypothetical protein
Q59RR7	Q59RR7_CANAL	769.715	3	ATEYFIESMNVGLEsPKPSK	0.008		28	47	22.1	0.0075	41474.8	Likely hexokinase
Q59RR7	Q59RR7_CANAL	494.709	2	LSSStGDNK	0.062	LSSStGDNK	245	253	19.1	0.026	41474.8	Likely hexokinase
Q59S37	Q59S37_CANAL	773.839	2	LFVtDTPDTNSTR	0.043	LFVtDTPDTNSTR	623	635	40.2	9.2e-07	77251.2	Hypothetical protein MRE11 (Hypothetical protein CaJ7.0149)
Q59S37	Q59S37_CANAL	568.268	3	LFVTDTPDtNSTRR	0		623	636	22.5	0.018	77251.2	Hypothetical protein MRE11 (Hypothetical protein CaJ7.0149)
Q59S37	Q59S37_CANAL	452.741	2	HVLsQLK	NA		528	534	17.2	0.027	77251.2	Hypothetical protein MRE11 (Hypothetical protein CaJ7.0149)
Q59S37	Q59S37_CANAL	472.232	2	KItTTATK	0.002		576	583	20.1	0.035	77251.2	Hypothetical protein MRE11 (Hypothetical protein CaJ7.0149)
Q59S37	Q59S37_CANAL	526.765	2	tDLIPGAASK	0.509	tDLIPGAASK	317	326	19	0.039	77251.2	Hypothetical protein MRE11 (Hypothetical protein CaJ7.0149)
Q59S39	Q59S39_CANAL	492.242	3	HLNIYHQNIsR	0.103	HLNIYHQNIsR	610	620	25.8	7.6e-05	200926	Likely ribosomal eIF2-alpha kinase (Hypothetical protein CaJ7.0147)
Q59S39	Q59S39_CANAL	564.261	2	LQsETNLSR	0.13	LQsETNLSR	569	577	34	0.00023	200926	Likely ribosomal eIF2-alpha kinase (Hypothetical protein CaJ7.0147)
Q59S40	Q59S40_CANAL	654.309	3	Acetyl-MLLSGsPTQQQQQHQK	0.016		1	16	37.5	6.3e-07	68305.1	Hypothetical protein (Hypothetical protein CaJ7.0146)
Q59S40	Q59S40_CANAL	596.625	3	LLSGsPTQQQQQHQK	0.019		1	16	36.9	1.2e-06	68305.1	Hypothetical protein (Hypothetical protein CaJ7.0146)
Q59S40	Q59S40_CANAL	645.639	3	mLLSGsPTQQQQQHQK	0.007		1	16	35.8	5.8e-06	68305.1	Hypothetical protein (Hypothetical protein CaJ7.0146)
Q59S40	Q59S40_CANAL	544.209	2	SsSAsITFK			345	353	27.1	7.8e-06	68305.1	Hypothetical protein (Hypothetical protein CaJ7.0146)
Q59S40	Q59S40_CANAL	622.257	2	RSssASITFK			344	353	20.6	0.013	68305.1	Hypothetical protein (Hypothetical protein CaJ7.0146)
Q59S46	Q59S46_CANAL	944.417	2	ISPsDQSSTVISASWDK	0.118	IsPSDQSSTVISASWDK	157	173	35	1.7e-06	23462.9	Hypothetical protein ASC1 (Hypothetical protein CaJ7.0140)
Q59S46	Q59S46_CANAL	944.401	2	ISPSDQsSTVISASWDK	0.032	ISPSDQsSTVISASWDK	157	173	37.7	1.6e-05	23462.9	Hypothetical protein ASC1 (Hypothetical protein CaJ7.0140)
Q59S46	Q59S46_CANAL	534.762	2	GDVLSVsIAK	0.102	GDVLSVsIAK	109	118	43.8	1.9e-05	23462.9	Hypothetical protein ASC1 (Hypothetical protein CaJ7.0140)
Q59S47	Q59S47_CANAL	463.714	2	sQLHFSK	0.116	sQLHFSK	298	304	25.3	0.0018	53101.2	Hypothetical protein (Hypothetical protein CaJ7.0139)
Q59S64	Q59S64_CANAL	872.883	2	TsVTPQLQQYTDQR	0.003		384	397	46.1	1.5e-08	50488.4	Likely protein kinase
Q59S64	Q59S64_CANAL	528.605	3	RGsQVNVIDFGLAK	NA		141	154	28.2	2.5e-05	50488.4	Likely protein kinase
Q59S65	Q59S65_CANAL	488.254	3	IFTSDsKESLKK	0.001		13	24	34.8	6.1e-05	19564.6	Hypothetical protein
Q59S71	Q59S71_CANAL	661.941	3	NVSHADTSADDMLDsPTK	0.035	NVSHADTSADDMLDsPTK	117	134	27.6	0.0021	41970.4	Hypothetical protein
Q59S75	Q59S75_CANAL	519.913	3	sLGVDAMSVDDLKK	0.329	sLGVDAMSVDDLKK	79	92	24.7	0.0001	24378.9	Likely cytosolic ribosomal protein L1
Q59S75	Q59S75_CANAL	519.913	3	SLGVDAMsVDDLKK	0.404	SLGVDAMsVDDLKK	79	92	27.2	0.0015	24378.9	Likely cytosolic ribosomal protein L1
Q59S78	Q59S78_CANAL	522.731	2	AELEsLFR	NA		70	77	43.4	2.7e-05	17055.7	Likely ARF family GTP binding protein
Q59S80	Q59S80_CANAL	727.848	2	STtINEINELIK	0.001		56	67	32.7	0.0014	14697	Hypothetical protein
Q59S80	Q59S80_CANAL	705.336	3	sQSTITQIPSSQLHYSTR	0.016		36	53	26.9	0.0024	14697	Hypothetical protein
Q59S81	Q59S81_CANAL	619.958	3	KLEPNQPSVSyICSR	0.024	KLEPNQPSVSyICSR	224	238	37.7	3.1e-07	46528.4	Likely protein kinase
Q59S81	Q59S81_CANAL	619.955	3	KLEPNQPSVsYICSR	0.058	KLEPNQPSVSyICSR	224	238	48.6	1.5e-06	46528.4	Likely protein kinase
Q59S83	Q59S83_CANAL	763.335	2	EVIDTESRGEtPI	0.128	EVIDTESRGEtPI	371	383	40.5	1.3e-06	42314.1	Potential COMPASS histone methyltransferase subunit Swd3p
Q59S83	Q59S83_CANAL	803.319	2	EVIDTEsRGEtPI			371	383	38.4	2.7e-06	42314.1	Potential COMPASS histone methyltransferase subunit Swd3p
Q59S84	Q59S84_CANAL	649.976	3	KSsPSSEPNDDIIGFFK	0		380	396	29.5	0.00015	64133	Likely protein kinase
Q59S87	Q59S87_CANAL	797.323	2	DTsSIGSNTTSTTNK	0		365	379	30.8	8.1e-06	111118	Hypothetical protein
Q59S87	Q59S87_CANAL	601.281	2	sLSNSFITPR	0.013		953	962	34.1	0.00015	111118	Hypothetical protein
Q59S87	Q59S87_CANAL	695.294	2	SVSNtPTTSPYR	0		81	92	26.8	0.0025	111118	Hypothetical protein
Q59S87	Q59S87_CANAL	440.243	2	LLsTIPR	0		700	706	21.3	0.022	111118	Hypothetical protein
Q59SC9	Q59SC9_CANAL	723.678	3	VLAsPIVSMTSQQSVANNDK	0.034	VLAsPIVSMTSQQSVANNDK	261	280	39.9	2.7e-06	64030.1	Potential TOR2 kinase complex component
Q59SC9	Q59SC9_CANAL	646.789	2	qHSQsLPSAFK	0.004		286	296	34.2	8.2e-06	64030.1	Potential TOR2 kinase complex component
Q59SC9	Q59SC9_CANAL	513.244	2	SVTIsPSVR	0.058	SVTIsPSVR	358	366	40.1	1.2e-05	64030.1	Potential TOR2 kinase complex component
Q59SC9	Q59SC9_CANAL	437.205	3	QHsQSLPSAFK	0.012		286	296	24.5	0.00068	64030.1	Potential TOR2 kinase complex component
Q59SC9	Q59SC9_CANAL	632.787	2	SSGTLPSsPSHK	0.003		527	538	27.9	0.0079	64030.1	Potential TOR2 kinase complex component
Q59SC9	Q59SC9_CANAL	694.971	3	LAFNsSHsSPNHNEILR			468	484	27.2	0.0098	64030.1	Potential TOR2 kinase complex component
Q59SE2	Q59SE2_CANAL	525.278	2	KNsIPAALR	NA		470	478	33.4	1.5e-05	54844.8	Hypothetical protein STB3
Q59SE2	Q59SE2_CANAL	531.593	3	SSSsVSNSITKPYR	0.003		336	349	25.1	0.0012	54844.8	Hypothetical protein STB3
Q59SE2	Q59SE2_CANAL	531.597	3	SsSSVSNSITKPYR	0		336	349	21.9	0.0018	54844.8	Hypothetical protein STB3
Q59SE3	Q59SE3_CANAL	857.861	2	LQQEsNEEFNQLR	NA		173	185	36.1	1.6e-05	91064.7	Hypothetical protein CDC47
Q59SE6	Q59SE6_CANAL	777.316	3	NVDDPIENADVSQFNIsDEE	0.146	NVDDPIENADVSQFNIsDEE	492	511	52.4	3.7e-10	58241.3	Hypothetical protein
Q59SF4	Q59SF4_CANAL	515.269	2	VAsAPLVHR	NA		296	304	41	3.7e-09	89244.2	Likely protein kinase
Q59SF4	Q59SF4_CANAL	847.704	3	IHYSELSSSSEDNsEPSSPALPK	0.058	IHYSELSSSSEDNsEPSSPALPK	237	259	46.9	1.8e-07	89244.2	Likely protein kinase
Q59SF4	Q59SF4_CANAL	668.984	3	TNsFVGTEEYIAPEVIR	0		577	593	36	0.00015	89244.2	Likely protein kinase
Q59SF4	Q59SF4_CANAL	693.323	2	SAsTPLtPPKVK			137	148	30.5	0.0004	89244.2	Likely protein kinase
Q59SF4	Q59SF4_CANAL	628.309	2	EtSVPVITTTK	0		150	160	21.9	0.0021	89244.2	Likely protein kinase
Q59SF4	Q59SF4_CANAL	395.677	2	SIsFTR	0.053	SIsFTR	65	70	19	0.0035	89244.2	Likely protein kinase
Q59SI6	Q59SI6_CANAL	751.82	2	TLsMEsISSLFK			23	34	42	3.2e-08	53059.1	Hypothetical protein PCT1
Q59SI6	Q59SI6_CANAL	785.874	2	LsGGSSTSSVPSTPVK	0.009		413	428	34.4	1.7e-07	53059.1	Hypothetical protein PCT1
Q59SI6	Q59SI6_CANAL	711.823	2	TLSMEsISSLFK	0.01		23	34	40.5	6.8e-07	53059.1	Hypothetical protein PCT1
Q59SI6	Q59SI6_CANAL	628.32	3	RLsGGSSTSSVPSTPVKR	0		412	429	39.5	6.7e-06	53059.1	Hypothetical protein PCT1
Q59SI6	Q59SI6_CANAL	883.999	3	FIEDGNSQNSSNHGsDEESTNSSK	0.018		329	352	34.1	1.2e-05	53059.1	Hypothetical protein PCT1
Q59SI6	Q59SI6_CANAL	719.827	2	TLSmEsISSLFK	0.016		23	34	36.2	1.4e-05	53059.1	Hypothetical protein PCT1
Q59SI6	Q59SI6_CANAL	719.818	2	TLsmESISSLFK	0.017		23	34	33.3	1.5e-05	53059.1	Hypothetical protein PCT1
Q59SI6	Q59SI6_CANAL	628.329	3	RLSGGSSTSsVPSTPVKR	0		412	429	27.1	0.00034	53059.1	Hypothetical protein PCT1
Q59SI6	Q59SI6_CANAL	647.043	4	DDHsEQETEEEIKPIVIKPIR	0.018		388	408	26.8	0.0086	53059.1	Hypothetical protein PCT1
Q59SI6	Q59SI6_CANAL	654.977	3	RLsGGSsTSSVPSTPVKR			412	429	20.1	0.015	53059.1	Hypothetical protein PCT1
Q59SI6	Q59SI6_CANAL	602.946	3	RLsGGSSTSsVPSTPVK			412	428	23	0.026	53059.1	Hypothetical protein PCT1
Q59SI6	Q59SI6_CANAL	576.286	3	LsGGSSTSSVPSTPVKR	0.014		413	429	21.3	0.03	53059.1	Hypothetical protein PCT1
Q59SI6	Q59SI6_CANAL	609.261	2	VSSPLSDFAsK	0.01		353	363	22.6	0.031	53059.1	Hypothetical protein PCT1
Q59SI6	Q59SI6_CANAL	681.634	3	RLsGGSSTSsVPsTPVKR			412	429	22.7	0.045	53059.1	Hypothetical protein PCT1
Q59SI8	Q59SI8_CANAL	585.76	2	LQGtSSDLNR	0.104	LQGtSSDLNR	334	343	41.9	6e-07	76217.4	Potential epsin-like clathrin-binding protein
Q59SI8	Q59SI8_CANAL	677.806	2	IQANAtGNNPFK	NA		565	576	34	1.3e-06	76217.4	Potential epsin-like clathrin-binding protein
Q59SI9	Q59SI9_CANAL	642.308	3	LSTPHKsPsPPPVPPAR			601	617	29.5	0.00077	96649.3	Hypothetical protein
Q59SK8	Q59SK8_CANAL	500.243	2	GVsELSISK	0.15	GVsELSISK	100	108	41.7	3.2e-07	27239.2	Hypothetical protein
Q59SK8	Q59SK8_CANAL	693.319	2	GVsELSISKEEK	0.141	GVsELSISKEEK	100	111	40.8	1.3e-06	27239.2	Hypothetical protein
Q59SK8	Q59SK8_CANAL	701.949	3	DITGETtGGEDGSNDDIVTK	0.023	DITGETtGGEDGSNDDIVTK	75	94	40.5	1.1e-05	27239.2	Hypothetical protein
Q59SK8	Q59SK8_CANAL	744.657	3	DITGETtGGEDGSNDDIVTKK	0.123	DITGETTGGEDGSNDDIVtKK	75	95	24.6	0.015	27239.2	Hypothetical protein
Q59SK9	Q59SK9_CANAL	570.775	2	TGsIIGGVGGSR	0.002		777	788	50.2	8.3e-10	123526	Hypothetical protein
Q59SK9	Q59SK9_CANAL	828.368	2	LSIANDADsISDLNK	0.089	LSIANDADsISDLNK	758	772	50	5.5e-07	123526	Hypothetical protein
Q59SK9	Q59SK9_CANAL	595.285	3	LSIANDADsISDLNKK	0.052	LSIANDADsISDLNKK	758	773	48	8.6e-06	123526	Hypothetical protein
Q59SK9	Q59SK9_CANAL	536.778	2	RLsTTISSK	0.002		794	802	30.5	4.6e-05	123526	Hypothetical protein
Q59SK9	Q59SK9_CANAL	491.585	3	RGsLLYNSVQQK	0.192	RGsLLYNSVQQK	809	820	30.3	6.6e-05	123526	Hypothetical protein
Q59SK9	Q59SK9_CANAL	606.959	3	WSHRPsFIDPSPNAK	0.011		722	736	24	0.0034	123526	Hypothetical protein
Q59SL0	Q59SL0_CANAL	601.935	3	RNsDEELEEHQLPK	NA		366	379	32.6	0.00032	82287.3	Hypothetical protein MLH1
Q59SL1	Q59SL1_CANAL	559.59	3	KVStQEQIEDYEK	0.027	KVStQEQIEDYEK	11	23	28.6	0.00063	42757.6	Hypothetical protein QRI2
Q59SM5	Q59SM5_CANAL	869.059	3	Acetyl-sDIDIDNVLNLEEEQYELGFK	0.13	MSDIDIDNVLNLEEEQyELGFK	1	22	45.1	1.1e-09	17272.4	Hypothetical protein
Q59SN0	Q59SN0_CANAL	607.241	3	GRSNIGsQSDDEEMSK	0.227	GRsNIGSQSDDEEMSK	29	44	29	0.00039	32924.2	Hypothetical protein
Q59SN3	Q59SN3_CANAL	689.778	2	FGsTAGIPEsPR			1838	1849	42.2	2.1e-09	244691	Aspartate transcarbamylase
Q59SN3	Q59SN3_CANAL	696.343	3	RPSLAPEtPEPQPAIFEK	0.15	RPSLAPEtPEPQPAIFEK	1863	1880	40.3	2.3e-06	244691	Aspartate transcarbamylase
Q59SN3	Q59SN3_CANAL	649.786	2	FGsTAGIPESPR			1838	1849	39.3	3.4e-06	244691	Aspartate transcarbamylase
Q59SN3	Q59SN3_CANAL	696.349	3	RPsLAPETPEPQPAIFEK	0.057	RPsLAPETPEPQPAIFEK	1863	1880	43.4	4.9e-06	244691	Aspartate transcarbamylase
Q59SN3	Q59SN3_CANAL	567.893	3	sRFGStAGIPEsPR			1836	1849	33.6	2.2e-05	244691	Aspartate transcarbamylase
Q59SN3	Q59SN3_CANAL	512.69	2	VsFSSDmR	0.046	VsFSSDmR	1855	1862	24.8	0.0002	244691	Aspartate transcarbamylase
Q59SN3	Q59SN3_CANAL	514.581	3	sRFGSTAGIPESPR	0.2	sRFGSTAGIPESPR	1836	1849	34.3	0.00022	244691	Aspartate transcarbamylase
Q59SN3	Q59SN3_CANAL	590.748	2	RVsFSSDmR	0.002		1854	1862	26.8	0.00023	244691	Aspartate transcarbamylase
Q59SN3	Q59SN3_CANAL	723.002	3	RPsLAPEtPEPQPAIFEK			1863	1880	25.9	0.00054	244691	Aspartate transcarbamylase
Q59SN3	Q59SN3_CANAL	582.747	2	RVsFSSDMR	0.022	RVsFSSDMR	1854	1862	29.6	0.0024	244691	Aspartate transcarbamylase
Q59SN3	Q59SN3_CANAL	599.754	2	VsALLSsSmK			799	808	24.8	0.0079	244691	Aspartate transcarbamylase
Q59SN3	Q59SN3_CANAL	524.234	2	VPQFsFSR	0.155	VPQFSFsR	1316	1323	16.1	0.0094	244691	Aspartate transcarbamylase
Q59SR4	Q59SR4_CANAL	632.835	2	GLLPTFsPKPK	0.005		162	172	34.7	5.4e-05	52612.3	Hypothetical protein NOB1
Q59SR6	Q59SR6_CANAL	751.627	3	DMDSSNTSDtEESTSNLPSR	0.006		411	430	31.2	0.00016	71744.5	Hypothetical protein
Q59SR6	Q59SR6_CANAL	686.327	3	IAsNSVASLSLSPNLDFNK	0.004		219	237	29.1	0.0007	71744.5	Hypothetical protein
Q59SR6	Q59SR6_CANAL	463.888	3	tKTSPMLTTSDK	0		189	200	24.5	0.0034	71744.5	Hypothetical protein
Q59SR6	Q59SR6_CANAL	639.651	3	STtPLLGQPQQQVHFR	0.016		431	446	22.1	0.0054	71744.5	Hypothetical protein
Q59SS1	Q59SS1_CANAL	701.971	3	LIDSNQIPYGSTDsNDER	0.026	LIDSNQIPYGSTDsNDER	30	47	42.6	4.7e-06	33300.5	Hypothetical protein CCC1
Q59SS1	Q59SS1_CANAL	376.7	2	Acetyl-sLVAIK	NA		1	7	20.5	0.0018	33300.5	Hypothetical protein CCC1
Q59SS8	Q59SS8_CANAL	541.234	2	SGsFTDIFK	0.01		516	524	42.2	4.2e-07	65696.8	Hypothetical protein DGA2
Q59SS8	Q59SS8_CANAL	878.02	3	EVLVEETESsEDDDEQDLVSER	0		160	181	32.8	0.00026	65696.8	Hypothetical protein DGA2
Q59SS8	Q59SS8_CANAL	682.975	3	KsGSFTDIFKMNGEtPK			515	531	22.5	0.0064	65696.8	Hypothetical protein DGA2
Q59ST2	Q59ST2_CANAL	707.641	3	HSQTDVINSSTQGSHsVEK	0		7	25	34.3	6.7e-05	64443.4	Potential peptide transporter
Q59ST4	Q59ST4_CANAL	709.814	2	LsDSVVAEDYLK	0.016		552	563	40.8	2.1e-07	78293.2	Likely protein kinase
Q59ST4	Q59ST4_CANAL	511.927	3	KIDNGIHIEsLSK	0.011		466	478	36.1	6.5e-05	78293.2	Likely protein kinase
Q59ST4	Q59ST4_CANAL	469.224	3	IDNGIHIEsLSK	0.015		467	478	24.6	0.0021	78293.2	Likely protein kinase
Q59ST9	Q59ST9_CANAL	821.335	3	TKEsENEDDWEVMDIDEVAK	0.011		151	170	44.1	8e-07	26686.7	Hypothetical protein SIC1
Q59ST9	Q59ST9_CANAL	684.984	3	Acetyl-SSSNDTPSLFVTPQtPPR	0.217	MSSSNDTPSLFVTPQtPPR	1	19	33.4	0.0008	26686.7	Hypothetical protein SIC1
Q59SU5	H2A1_CANAL	484.723	2	GGVKAsQEL	NA		124	132	23.4	0.0017	14009.3	Histone H2A.1
Q59T32	Q59T32_CANAL	581.74	2	SASSLNSSSsR	0.009		26	36	52.6	2.3e-06	57829.8	Potential integral nuclear/ER membrane protein
Q59T37	Q59T37_CANAL	427.696	2	TNsPISR	0.119	TNsPISR	574	580	30.3	2.6e-05	100515	Potential intra-Golgi transport complex subunit 4
Q59T37	Q59T37_CANAL	780.343	2	tSFDTSDDLLPIR	0		369	381	30	0.00031	100515	Potential intra-Golgi transport complex subunit 4
Q59T43	Q59T43_CANAL	546.293	3	NVSHPNLLLVHsAR	0.33	NVSHPNLLLVHsAR	412	425	47.9	1.6e-09	67558	Hypothetical protein BAS1 (Hypothetical protein)
Q59T43	Q59T43_CANAL	739.657	3	NNsITHFELINNSTIPsR			457	474	37.8	6.2e-07	67558	Hypothetical protein BAS1 (Hypothetical protein)
Q59T43	Q59T43_CANAL	736.987	3	KSPtPETAtINSEAEMTNK			241	259	33.3	1.3e-05	67558	Hypothetical protein BAS1 (Hypothetical protein)
Q59T43	Q59T43_CANAL	736.977	3	KsPtPETATINSEAEMTNK			241	259	45.8	1.4e-05	67558	Hypothetical protein BAS1 (Hypothetical protein)
Q59T43	Q59T43_CANAL	572.945	3	NVsHPNLLLVHsAR			412	425	31.9	3.1e-05	67558	Hypothetical protein BAS1 (Hypothetical protein)
Q59T43	Q59T43_CANAL	625.304	3	RSsTFNSDLFPNPLAK	0.007		475	490	35	5.9e-05	67558	Hypothetical protein BAS1 (Hypothetical protein)
Q59T43	Q59T43_CANAL	704.678	3	SAsFDINSNILPPISQSNK	0.002		369	387	28.5	0.0035	67558	Hypothetical protein BAS1 (Hypothetical protein)
Q59T43	Q59T43_CANAL	756.713	3	SAsFDINSNILPPISQSNKR	0.004		369	388	26.2	0.0056	67558	Hypothetical protein BAS1 (Hypothetical protein)
Q59T43	Q59T43_CANAL	710.32	3	KSPTPETAtINSEAEMTNK	0.008		241	259	21.6	0.014	67558	Hypothetical protein BAS1 (Hypothetical protein)
Q59T43	Q59T43_CANAL	706.986	3	RESQNSSFNsPMLTPSTR	0.008		502	519	27.4	0.019	67558	Hypothetical protein BAS1 (Hypothetical protein)
Q59T43	Q59T43_CANAL	596.592	3	RHssVSSTIFHNQK			398	411	21.1	0.031	67558	Hypothetical protein BAS1 (Hypothetical protein)
Q59T43	Q59T43_CANAL	791.696	3	NNsITHFELINNSTIPsRR			457	475	24	0.033	67558	Hypothetical protein BAS1 (Hypothetical protein)
Q59T44	Q59T44_CANAL	597.274	3	SGAAAIESAVDsQFGSGR	0.067	SGAAAIESAVDsQFGSGR	153	170	52.6	2.2e-09	22753	Likely cytosolic ribosomal protein S8
Q59T44	Q59T44_CANAL	597.265	3	sGAAAIESAVDSQFGSGR	0.157	sGAAAIESAVDSQFGSGR	153	170	38.6	1.4e-07	22753	Likely cytosolic ribosomal protein S8
Q59T44	Q59T44_CANAL	597.269	3	SGAAAIEsAVDSQFGSGR	0.025	sGAAAIESAVDSQFGSGR	153	170	43.1	2.4e-07	22753	Likely cytosolic ribosomal protein S8
Q59T44	Q59T44_CANAL	597.26	3	SGAAAIESAVDSQFGsGR	0.226	SGAAAIESAVDSQFGsGR	153	170	41.8	3.9e-07	22753	Likely cytosolic ribosomal protein S8
Q59T44	Q59T44_CANAL	524.26	3	LYAVIsSRPGQSGR	0.008		171	184	32.8	0.00014	22753	Likely cytosolic ribosomal protein S8
Q59T44	Q59T44_CANAL	564.58	3	VEtGNFSWGSEGVSR	0.036	VEtGNFSWGSEGVSR	60	74	32.7	0.00053	22753	Likely cytosolic ribosomal protein S8
Q59T44	Q59T44_CANAL	583.297	3	IAGVVYHPsNNELVR	0.005		78	92	29.2	0.0015	22753	Likely cytosolic ribosomal protein S8
Q59T47	Q59T47_CANAL	868.831	2	YDLNNsDTDDSEIR	0.029	YDLNNsDTDDSEIR	814	827	55.8	3.2e-08	150254	Hypothetical protein
Q59T47	Q59T47_CANAL	920.387	3	ANsLATGNPMMGQQSQYMGGGPNDPR	0.015		226	251	47.6	3.5e-08	150254	Hypothetical protein
Q59T47	Q59T47_CANAL	566.268	2	IGsPHTSPQK	0.222	IGsPHTSPQK	682	691	39.4	1.3e-07	150254	Hypothetical protein
Q59T47	Q59T47_CANAL	608.755	2	TMsMVNSNPR	0.003		252	261	40.3	5.1e-07	150254	Hypothetical protein
Q59T47	Q59T47_CANAL	839.364	2	VSsSGNMSLSDSSVIK	0.016		1057	1072	38.8	2.6e-06	150254	Hypothetical protein
Q59T47	Q59T47_CANAL	764.994	3	sQDKTPDFTQFNNNNNNSK	0.023	SQDKtPDFTQFNNNNNNSK	928	946	42.1	3.2e-06	150254	Hypothetical protein
Q59T47	Q59T47_CANAL	699.995	3	RTsSIDENDSTLNPILSR	0		1023	1040	44.5	8.3e-06	150254	Hypothetical protein
Q59T47	Q59T47_CANAL	690.316	2	TsPPLNNSSINR	0		734	745	39.3	1e-05	150254	Hypothetical protein
Q59T47	Q59T47_CANAL	606.246	2	IGsPHTsPQK			682	691	29.1	1.3e-05	150254	Hypothetical protein
Q59T47	Q59T47_CANAL	535.594	3	LRNsPQQQQNSPK	0.247	LRNsPQQQQNSPK	1122	1134	32.2	2.8e-05	150254	Hypothetical protein
Q59T47	Q59T47_CANAL	737.65	3	KMsKYDLNNSDTDDSEIR	0.002		810	827	32.2	4.9e-05	150254	Hypothetical protein
Q59T47	Q59T47_CANAL	847.359	2	VSsSGNmSLSDSSVIK	0.007		1057	1072	32.6	6.5e-05	150254	Hypothetical protein
Q59T47	Q59T47_CANAL	510.727	2	sSFSLNGTK	0		1003	1011	31.7	0.00014	150254	Hypothetical protein
Q59T47	Q59T47_CANAL	971.443	2	TSsIDENDSTLNPILSR	0.006		1024	1040	35.5	0.0003	150254	Hypothetical protein
Q59T47	Q59T47_CANAL	779.337	2	ISGTSDFPsPNVEK	0.059	ISGTSDFPsPNVEK	694	707	28.8	0.0004	150254	Hypothetical protein
Q59T47	Q59T47_CANAL	506.57	3	KsSMTSQTAAGVNR	0.003		113	126	29.6	0.00062	150254	Hypothetical protein
Q59T47	Q59T47_CANAL	506.572	3	KSsMTSQTAAGVNR	0		113	126	25.7	0.0013	150254	Hypothetical protein
Q59T47	Q59T47_CANAL	492.894	3	IPDTsNEDLHQK	0		594	605	28.4	0.0017	150254	Hypothetical protein
Q59T47	Q59T47_CANAL	690.987	3	ASTHDIFVTALDFNsPQK	0.169	ASTHDIFVTALDFNsPQK	658	675	29.4	0.0018	150254	Hypothetical protein
Q59T47	Q59T47_CANAL	521.743	2	FSsPAIANR	0.001		777	785	25.7	0.0019	150254	Hypothetical protein
Q59T47	Q59T47_CANAL	688.32	3	NSPQQQQNsPKLDEELK	0.127	NSPQQQQNsPKLDEELK	1124	1140	29	0.0025	150254	Hypothetical protein
Q59T47	Q59T47_CANAL	511.906	3	KSsmTSQTAAGVNR	0		113	126	28	0.0038	150254	Hypothetical protein
Q59T47	Q59T47_CANAL	764.315	3	KMsKYDLNNsDTDDSEIR			810	827	22.3	0.023	150254	Hypothetical protein
Q59T80	Q59T80_CANAL	661.292	2	GQsPEPPFLNR	NA		766	776	36.9	2.1e-06	90370.3	Hypothetical protein YAT1 (Putative cytosolic carnitine acetyltransferase)
Q59T86	Q59T86_CANAL	770.685	3	MQLQEPsPQADNGYAAQLLR	0.055	MQLQEPsPQADNGYAAQLLR	353	372	42	1.6e-07	112132	Potential DNA binding component of SBF
Q59T86	Q59T86_CANAL	776.023	3	mQLQEPsPQADNGYAAQLLR	0.088	mQLQEPsPQADNGYAAQLLR	353	372	42.1	2.6e-07	112132	Potential DNA binding component of SBF
Q59T95	Q59T95_CANAL	659.295	3	TPtEAAWDSPESHIGVAK	0.011		125	142	21.1	0.0031	53887	Hypothetical protein (Hypothetical protein CYS4)
Q59T96	Q59T96_CANAL	616.75	2	qQsNYSDISK	0.05	qQsNYSDISK	163	172	31.1	6.9e-05	87177.5	Potential SPS sensor component
Q59T96	Q59T96_CANAL	724.964	3	FKsDFDDENSAGAIYEER	0.017		560	577	32.4	0.0001	87177.5	Potential SPS sensor component
Q59T96	Q59T96_CANAL	856.696	3	TNtETDFNNSTDNNIIPSSFEK	0.001		221	242	26.1	0.00012	87177.5	Potential SPS sensor component
Q59T96	Q59T96_CANAL	856.695	3	TNTETDFNNSTDNNIIPSsFEK	0.01		221	242	27.4	0.0016	87177.5	Potential SPS sensor component
Q59T97	Q59T97_CANAL	525.243	2	LSVHSPsSR	0.002		203	211	27.9	8.3e-05	57283	Hypothetical protein
Q59T97	Q59T97_CANAL	610.266	3	KMPtVHGDSMETSSNK	0.028	KMPTVHGDSMETSsNK	468	483	28.1	0.013	57283	Hypothetical protein
Q59TB2	Q59TB2_CANAL	720.998	3	yGKVSGIASGtIEMIPLHK			280	298	25	0.0066	81844.2	Hypothetical protein SUV3
Q59TB3	Q59TB3_CANAL	615.799	2	IMSSLSIAsNK	0.012		420	430	38.7	1.1e-06	108914	Likely protein kinase
Q59TB3	Q59TB3_CANAL	695.637	3	GGNNsPIKFDNTmNSHQK	0.123	GGNNsPIKFDNTmNSHQK	594	611	30.9	1.9e-06	108914	Likely protein kinase
Q59TB3	Q59TB3_CANAL	559.776	2	LNIEIPsPR	NA		464	472	37.3	2.1e-06	108914	Likely protein kinase
Q59TB3	Q59TB3_CANAL	615.798	2	IMSsLSIASNK			420	430	41.7	1.1e-05	108914	Likely protein kinase
Q59TB3	Q59TB3_CANAL	761.687	3	STNDVMIEsDGENPLELIVK	0.507	STNDVMIEsDGENPLELIVK	574	593	41.1	3e-05	108914	Likely protein kinase
Q59TB3	Q59TB3_CANAL	690.304	3	GGNNsPIKFDNTMNSHQK	0.079	GGNNsPIKFDNTMNSHQK	594	611	27.4	3.5e-05	108914	Likely protein kinase
Q59TB3	Q59TB3_CANAL	662.34	2	RLsQVISSEPK	0.089	RLsQVISSEPK	520	530	28	3.5e-05	108914	Likely protein kinase
Q59TB3	Q59TB3_CANAL	618.631	3	SVLSLSDQASGsQPLER	0.005		403	419	33	7.9e-05	108914	Likely protein kinase
Q59TB3	Q59TB3_CANAL	520.252	3	LQRIsFDTEELK	0.028	LQRIsFDTEELK	338	349	32.2	0.0001	108914	Likely protein kinase
Q59TB3	Q59TB3_CANAL	574.278	3	SLDKNDTTQIPPsPK	0.352	SLDKNDTTQIPPsPK	443	457	29.5	0.00038	108914	Likely protein kinase
Q59TB3	Q59TB3_CANAL	694.349	3	VKSVLsLSDQASGSQPLER	0.004		401	419	30.7	0.00043	108914	Likely protein kinase
Q59TB3	Q59TB3_CANAL	497.236	2	APsPPIGFK	NA		889	897	22.6	0.00043	108914	Likely protein kinase
Q59TB3	Q59TB3_CANAL	639.91	3	LRsNSsEDISEDSYR			820	834	26.8	0.0013	108914	Likely protein kinase
Q59TC7	Q59TC7_CANAL	924.35	3	SPENPMNQDTNVsYNAsGEDISNK			189	212	44	1.3e-07	25081.2	Hypothetical protein
Q59TC9	Q59TC9_CANAL	646.308	3	RKPDEsTTDIPIEDLK	0		714	729	30.4	0.0011	213886	Hypothetical protein MOT1
Q59TD8	Q59TD8_CANAL	854.34	2	ENDAASsADISGFSTR	0		392	407	37.1	2.7e-05	48648	Likely EBNA-like pre-rRNA processing factor EBP2p
Q59TD8	Q59TD8_CANAL	567.284	3	qQLKsHQLIDAIDK	NA		8	21	30.5	0.00013	48648	Likely EBNA-like pre-rRNA processing factor EBP2p
Q59TD8	Q59TD8_CANAL	610.287	2	sHQLIDAIDK	NA		12	21	24.6	0.0063	48648	Likely EBNA-like pre-rRNA processing factor EBP2p
Q59TE0	Q59TE0_CANAL	438.689	2	YNsSIGR	0.037	YNsSIGR	63	69	27.9	0.00012	20963	Likely cytosolic ribosomal protein L17
Q59TE0	Q59TE0_CANAL	516.736	2	RYNsSIGR	0.013		62	69	23.8	0.045	20963	Likely cytosolic ribosomal protein L17
Q59TI1	Q59TI1_CANAL	775.997	3	SSNEsIDNELEAEPEQDAIR	0.003		118	137	51.5	6.8e-05	42477.9	Hypothetical protein MAK32
Q59TL3	Q59TL3_CANAL	711.814	2	LGNVsFTSSSTSR	0.125	LGNVsFTSSSTSR	656	668	46.3	3.3e-08	88058.1	Potential clathrin-associated protein AP-3 complex component
Q59TL3	Q59TL3_CANAL	711.821	2	LGNVSFTSSStSR	0.002		656	668	39.5	3.5e-08	88058.1	Potential clathrin-associated protein AP-3 complex component
Q59TL3	Q59TL3_CANAL	805.038	3	TKsPSPVGEHSFSSQQFAQQR	0.033	TKsPSPVGEHSFSSQQFAQQR	671	691	30.9	0.00013	88058.1	Potential clathrin-associated protein AP-3 complex component
Q59TL3	Q59TL3_CANAL	523.244	2	ITsMIDSAK	0.051	ITsMIDSAK	8	16	24.5	0.00042	88058.1	Potential clathrin-associated protein AP-3 complex component
Q59TL3	Q59TL3_CANAL	728.663	3	SPsPVGEHSFSSQQFAQQR	0.023	SPsPVGEHSFSSQQFAQQR	673	691	29.2	0.00092	88058.1	Potential clathrin-associated protein AP-3 complex component
Q59TL3	Q59TL3_CANAL	728.657	3	SPSPVGEHSFSsQQFAQQR	0.004		673	691	25.4	0.0037	88058.1	Potential clathrin-associated protein AP-3 complex component
Q59TL3	Q59TL3_CANAL	604.035	4	TKSPSPVGEHSFSsQQFAQQR	0.001		671	691	29.5	0.0063	88058.1	Potential clathrin-associated protein AP-3 complex component
Q59TM0	Q59TM0_CANAL	660.796	2	SAsTASVNQFTK	0.003		80	91	48.7	3.5e-08	95282.5	Likely oxysterol-binding protein
Q59TM0	Q59TM0_CANAL	700.774	2	SAsTAsVNQFTK			80	91	36.3	3.3e-06	95282.5	Likely oxysterol-binding protein
Q59TM0	Q59TM0_CANAL	521.916	3	SRsASTASVNQFTK	0.003		78	91	28.8	0.00057	95282.5	Likely oxysterol-binding protein
Q59TN7	Q59TN7_CANAL	743.857	2	NLsNVVDLLYEK	0.359	NLsNVVDLLYEK	479	490	47.1	4.6e-07	56470.3	Likely 26S proteasome regulatory particle subunit Rpn6p
Q59TN7	Q59TN7_CANAL	646.259	2	sLDIQIDVtK			176	185	23.6	0.0015	56470.3	Likely 26S proteasome regulatory particle subunit Rpn6p
Q59TS0	Q59TS0_CANAL	794.702	3	LSNPEENNVEIHEYSsLSLK	0.007		97	116	30.4	0.0018	96344.2	Hypothetical protein NUP84
Q59TS0	Q59TS0_CANAL	612.3	2	EVNsLLNINK	NA		172	181	22.4	0.015	96344.2	Hypothetical protein NUP84
Q59TS0	Q59TS0_CANAL	544.212	2	GsSVNSSLEK	0		708	717	20.9	0.029	96344.2	Hypothetical protein NUP84
Q59TS2	Q59TS2_CANAL	712.967	3	DRFATQEEPYDsEEVKN	0.02		212	228	34	0.00074	24724.8	Hypothetical protein
Q59TS9	Q59TS9_CANAL	659.802	2	AVsPQPQQQQK	NA		452	462	44.3	2.1e-08	131769	Potential EH Domains and Endocytosis protein
Q59TS9	Q59TS9_CANAL	839.377	2	qVSHSsINSQSTAIR	0.002		182	196	48.3	1.5e-07	131769	Potential EH Domains and Endocytosis protein
Q59TS9	Q59TS9_CANAL	587.24	3	HQSSsSNLAsPVEEK			426	440	37.7	5.2e-07	131769	Potential EH Domains and Endocytosis protein
Q59TS9	Q59TS9_CANAL	693.332	3	qVsDIQNSSVPVQSQSIAK	0.014		332	350	34.5	2.7e-06	131769	Potential EH Domains and Endocytosis protein
Q59TS9	Q59TS9_CANAL	560.585	3	HQSSSSNLAsPVEEK	0.355	HQSSSSNLAsPVEEK	426	440	39.2	3.5e-06	131769	Potential EH Domains and Endocytosis protein
Q59TS9	Q59TS9_CANAL	619.638	3	TEsLTSSVQNNAALSVR	0.003		888	904	46.9	6.5e-06	131769	Potential EH Domains and Endocytosis protein
Q59TS9	Q59TS9_CANAL	479.215	3	ASsSDLSHAEVPR	0.057	ASsSDLSHAEVPR	387	399	36.6	1.1e-05	131769	Potential EH Domains and Endocytosis protein
Q59TS9	Q59TS9_CANAL	698.994	3	QVsDIQNSSVPVQSQSIAK	0.099	QVsDIQNSSVPVQSQSIAK	332	350	33.5	2.2e-05	131769	Potential EH Domains and Endocytosis protein
Q59TS9	Q59TS9_CANAL	663.784	2	YEsPPTAQPTR	0.014		1164	1174	34.3	2.3e-05	131769	Potential EH Domains and Endocytosis protein
Q59TS9	Q59TS9_CANAL	479.22	3	AsSSDLSHAEVPR	0.021	AsSSDLSHAEVPR	387	399	31.7	3.1e-05	131769	Potential EH Domains and Endocytosis protein
Q59TS9	Q59TS9_CANAL	654.668	3	SVPPPPPPPSQtQPSLQK	0.005		471	488	28.9	4.8e-05	131769	Potential EH Domains and Endocytosis protein
Q59TS9	Q59TS9_CANAL	845.004	3	qHLEGsDKGsSSFEIVNAEEAR			942	963	37.9	6.7e-05	131769	Potential EH Domains and Endocytosis protein
Q59TS9	Q59TS9_CANAL	646.294	3	TEsLTSsVQNNAALSVR			888	904	34.7	8.5e-05	131769	Potential EH Domains and Endocytosis protein
Q59TS9	Q59TS9_CANAL	646.285	3	tESLTSsVQNNAALSVR			888	904	34.7	0.00027	131769	Potential EH Domains and Endocytosis protein
Q59TS9	Q59TS9_CANAL	561.235	2	sYQGSSTVGR	0		1007	1016	36.9	0.00034	131769	Potential EH Domains and Endocytosis protein
Q59TS9	Q59TS9_CANAL	840.359	2	HQSsSSNLASPVEEK	0.004		426	440	36	0.00037	131769	Potential EH Domains and Endocytosis protein
Q59TS9	Q59TS9_CANAL	565.604	3	QVSHSsINSQSTAIR	0.01		182	196	28.5	0.0004	131769	Potential EH Domains and Endocytosis protein
Q59TS9	Q59TS9_CANAL	693.325	3	qVSDIQNsSVPVQSQSIAK	0.023	qVsDIQNSSVPVQSQSIAK	332	350	28.8	0.00047	131769	Potential EH Domains and Endocytosis protein
Q59TS9	Q59TS9_CANAL	672.939	3	TEsLtSsVQNNAALSVR			888	904	32.1	0.0007	131769	Potential EH Domains and Endocytosis protein
Q59TS9	Q59TS9_CANAL	597.94	3	DPPRYEsPPTAQPTR	0		1160	1174	28.6	0.0012	131769	Potential EH Domains and Endocytosis protein
Q59TS9	Q59TS9_CANAL	879.363	2	qVSHssINSQSTAIR			182	196	29.8	0.0013	131769	Potential EH Domains and Endocytosis protein
Q59TS9	Q59TS9_CANAL	480.238	3	SLTSQTtNLHEK	0		555	566	24.7	0.0035	131769	Potential EH Domains and Endocytosis protein
Q59TS9	Q59TS9_CANAL	788.325	2	GsSSFEIVNAEEAR	0.001		950	963	28.5	0.0052	131769	Potential EH Domains and Endocytosis protein
Q59TS9	Q59TS9_CANAL	757.363	3	qVSHSSINSQSTAIRHPtTR	0.004		182	201	24.8	0.0053	131769	Potential EH Domains and Endocytosis protein
Q59TS9	Q59TS9_CANAL	587.24	3	HQsSSsNLASPVEEK			426	440	18.9	0.012	131769	Potential EH Domains and Endocytosis protein
Q59TU0	NACB_CANAL	737.854	2	qLAEQIQAGKtPK	NA		115	127	36.3	1.4e-06	17031.4	Nascent polypeptide-associated complex subunit beta (NAC-beta) (Beta-NAC)
Q59TU0	NACB_CANAL	497.927	3	QLAEQIQAGKtPK	NA		115	127	33.8	0.00025	17031.4	Nascent polypeptide-associated complex subunit beta (NAC-beta) (Beta-NAC)
Q59TU1	Q59TU1_CANAL	455.737	2	LEsQILK	NA		12	18	22.5	0.0041	63955.5	Hypothetical protein GAD1
Q59TU3	Q59TU3_CANAL	754.364	2	APLLVEVQETVtE	0.37	APLLVEVQETVtE	108	120	54.8	2.7e-11	13606.3	Hypothetical protein
Q59TU4	Q59TU4_CANAL	590.279	2	tPPLEMGLNK	NA		23	32	34.7	1.9e-05	52469.3	Hypothetical protein
Q59TV0	Q59TV0_CANAL	554.256	3	RNsYINVNESQEK	0.008		307	319	27.1	0.00096	127631	Hypothetical protein
Q59TV0	Q59TV0_CANAL	510.581	3	RQsVSTFDTRPR	0.015		653	664	22.2	0.023	127631	Hypothetical protein
Q59TV3	Q59TV3_CANAL	413.228	2	sIALLTK	0.488	sIALLTK	15	21	25.2	1.2e-05	71774.8	Hypothetical protein AVT41
Q59TV3	Q59TV3_CANAL	703.655	3	HLPSDFDsLKQEGADITR	0.003		100	117	31.5	0.00052	71774.8	Hypothetical protein AVT41
Q59TV6	Q59TV6_CANAL	682.305	3	SmNVINNYGNGNGIAPAsR	0.197	SmNVINNYGNGNGIAPAsR	848	866	37.2	7.2e-08	109870	Hypothetical protein SVL3
Q59TV6	Q59TV6_CANAL	676.972	3	SMNVINNYGNGNGIAPAsR	0.227	SMNVINNYGNGNGIAPAsR	848	866	39.5	2.7e-07	109870	Hypothetical protein SVL3
Q59TV6	Q59TV6_CANAL	786.792	2	DSVMTsDGFQDYK	0.004		531	543	25.9	0.033	109870	Hypothetical protein SVL3
Q59TV6	Q59TV6_CANAL	712.611	3	NVNRDsVMtSDGFQDYK			527	543	22.8	0.034	109870	Hypothetical protein SVL3
Q59TZ8	Q59TZ8_CANAL	688.301	3	SQGMVINTEWGsFDNGLK	0.179	SQGMVINTEWGsFDNGLK	252	269	41.3	3.9e-06	52108.2	Likely hexokinase
Q59TZ8	Q59TZ8_CANAL	769.715	3	ATEYFIESMNVGLEsPKPSK	0.008		28	47	22.1	0.0075	52108.2	Likely hexokinase
Q59U02	Q59U02_CANAL	613.793	2	SAVASVsPSVSR	0.114	SAVASVsPSVSR	688	699	51.4	3.2e-07	100435	Potential Rho GTPase activator
Q59U02	Q59U02_CANAL	976.375	2	TDADEFYDAEAsPTPSR	0.022	TDADEFYDAEAsPTPSR	748	764	42.1	7.8e-06	100435	Potential Rho GTPase activator
Q59U02	Q59U02_CANAL	528.283	2	KSsVKDLAK	0.01		845	853	40.6	9.7e-06	100435	Potential Rho GTPase activator
Q59U02	Q59U02_CANAL	643.607	3	SPSNQsLNDLSStPPPK			821	837	34.6	1e-05	100435	Potential Rho GTPase activator
Q59U02	Q59U02_CANAL	643.6	3	SPsNQSLNDLSStPPPK			821	837	35.1	2.1e-05	100435	Potential Rho GTPase activator
Q59U02	Q59U02_CANAL	613.791	2	SAVAsVSPSVSR	0.101	SAVASVsPSVSR	688	699	32.1	2.1e-05	100435	Potential Rho GTPase activator
Q59U02	Q59U02_CANAL	464.239	2	sSVKDLAK	0.003		846	853	28.2	0.00041	100435	Potential Rho GTPase activator
Q59U02	Q59U02_CANAL	648.249	3	sFENGSTEDLQEPSsR			854	869	24	0.00057	100435	Potential Rho GTPase activator
Q59U02	Q59U02_CANAL	616.951	3	SPSNQSLNDLSsTPPPK	0.018		821	837	30.7	0.0014	100435	Potential Rho GTPase activator
Q59U02	Q59U02_CANAL	931.865	2	SFENGsTEDLQEPSSR	0		854	869	27.9	0.0056	100435	Potential Rho GTPase activator
Q59U02	Q59U02_CANAL	682.297	3	SAVASVsPSVsRNSSLtR			688	705	23.8	0.016	100435	Potential Rho GTPase activator
Q59U02	Q59U02_CANAL	438.535	3	SFtFKFDDVK	0.047	SFtFKFDDVK	321	330	20.1	0.044	100435	Potential Rho GTPase activator
Q59U04	Q59U04_CANAL	635.941	3	SAtLNSIDIAFHsVDR			25	40	35.7	3.4e-07	148319	Potential TOR2 kinase complex component
Q59U04	Q59U04_CANAL	829.848	2	Acetyl-sHVDLPLSSSSsIK			1	15	34.6	5.5e-06	148319	Potential TOR2 kinase complex component
Q59U04	Q59U04_CANAL	609.285	3	SATLNSIDIAFHsVDR	0.008		25	40	33.7	7.2e-05	148319	Potential TOR2 kinase complex component
Q59U04	Q59U04_CANAL	635.942	3	SATLNsIDIAFHsVDR			25	40	31.3	0.00013	148319	Potential TOR2 kinase complex component
Q59U04	Q59U04_CANAL	789.863	2	Acetyl-sHVDLPLSSSSSIK	0.038	MsHVDLPLSSSSSIK	1	15	27.3	0.00016	148319	Potential TOR2 kinase complex component
Q59U06	Q59U06_CANAL	754.853	2	NNsATSENPILIR	0.009		73	85	31.3	1.1e-05	54242.3	Hypothetical protein PPZ1
Q59U06	Q59U06_CANAL	839.028	3	ETTtSSLSTNsNTIDIDSLIDK			156	177	38.3	2.4e-05	54242.3	Hypothetical protein PPZ1
Q59U06	Q59U06_CANAL	531.923	3	TSTNHsIISTTSHK	0.021	TStNHSIISTTSHK	130	143	29.4	5.4e-05	54242.3	Hypothetical protein PPZ1
Q59U06	Q59U06_CANAL	812.358	3	ETTTSSLStNSNTIDIDSLIDK	0		156	177	34.3	0.0015	54242.3	Hypothetical protein PPZ1
Q59U06	Q59U06_CANAL	812.365	3	ETTTsSLSTNSNTIDIDSLIDK	0.006		156	177	28.2	0.0098	54242.3	Hypothetical protein PPZ1
Q59U10	Q59U10_CANAL	976.427	2	qSsVVSDFSIFSNSDNR	0		554	570	42.7	1.1e-07	80980.6	Potential zinc finger protein
Q59U10	Q59U10_CANAL	693.964	3	qsSVVSDFSIFSNSDNRK	0.001		554	571	37.7	2.7e-07	80980.6	Potential zinc finger protein
Q59U10	Q59U10_CANAL	657.975	3	StHSTETIQTTmVVVNK	0.01		682	698	38.9	3.6e-05	80980.6	Potential zinc finger protein
Q59U20	Q59U20_CANAL	782.003	3	SKsNVPEDTSPQDSTTTNNNK	0.005		879	899	30.3	0.00024	102907	Potential microtubule motor complex protein Kip1
Q59U53	Q59U53_CANAL	573.615	3	ELsPQSVPINLEANK	0.08	ELsPQSVPINLEANK	18	32	31.2	9e-05	55276.8	Potential TrimethylGuanosine Synthase
Q59U58	Q59U58_CANAL	670.278	2	qEDsLTNISNR	0.132	qEDsLTNISNR	163	173	42.5	1.1e-06	89948.1	Hypothetical protein
Q59U58	Q59U58_CANAL	715.326	3	KDEHLPSQsPTPQVDTER	0.003		174	191	36.4	0.00018	89948.1	Hypothetical protein
Q59U63	Q59U63_CANAL	398.197	2	RSsPIR	0.011		220	225	22.7	0.004	36870.5	Hypothetical protein URH1
Q59U67	Q59U67_CANAL	636.276	2	TStPQESSNLK	0.015		1	12	37.9	6.3e-06	39551.6	Hypothetical protein TAF4
Q59U67	Q59U67_CANAL	476.56	3	TStPQESSNLKR	0.045	TStPQESSNLKR	1	13	22.8	0.018	39551.6	Hypothetical protein TAF4
Q59U67	Q59U67_CANAL	593.294	2	VMLGLEKStK	0.002		233	242	16.7	0.024	39551.6	Hypothetical protein TAF4
Q59U70	Q59U70_CANAL	688.284	2	GsITENDFDGLK	0.036	GsITENDFDGLK	561	572	33.8	9.4e-07	70002.3	Hypothetical protein
Q59U70	Q59U70_CANAL	584.616	3	LNNEEAsIVEQAVGAK	NA		501	516	43.7	4.4e-06	70002.3	Hypothetical protein
Q59U73	Q59U73_CANAL	714.677	3	SNPTtPNAALYVTSSLNPSK	0.021	SNPTTPNAALyVTSSLNPSK	33	52	23.8	0.0043	37019.5	Hypothetical protein
Q59U73	Q59U73_CANAL	741.342	3	SNPttPNAALYVTSSLNPSK			33	52	26.6	0.017	37019.5	Hypothetical protein
Q59U73	Q59U73_CANAL	436.707	2	KADsPFK	NA		6	12	25	0.036	37019.5	Hypothetical protein
Q59U83	Q59U83_CANAL	613.648	3	STPIVTKPESDKtVEK	0.003		19	34	44.8	1.3e-07	45763.4	Hypothetical protein
Q59U83	Q59U83_CANAL	733.309	3	TVEKAsDDsEIDLPEVYK			31	48	33.2	7.7e-05	45763.4	Hypothetical protein
Q59U83	Q59U83_CANAL	830.835	2	ASDDsEIDLPEVYK	0.027	ASDDsEIDLPEVYK	35	48	31.2	0.00029	45763.4	Hypothetical protein
Q59U83	Q59U83_CANAL	613.649	3	StPIVTKPESDKTVEK	0		19	34	30	0.0005	45763.4	Hypothetical protein
Q59U83	Q59U83_CANAL	488.226	2	RVsDYQK	0.259	RVsDYQK	367	373	26.6	0.0074	45763.4	Hypothetical protein
Q59U87	Q59U87_CANAL	916.412	2	qKLENELSIsPEPER	0.001		12	26	38.7	3.2e-07	82951.8	Hypothetical protein
Q59U87	Q59U87_CANAL	796.852	2	LENELSIsPEPER	0.094	LENELSIsPEPER	14	26	49.7	7.4e-07	82951.8	Hypothetical protein
Q59U87	Q59U87_CANAL	616.97	3	QKLENELSIsPEPER	0.022	QKLENELSIsPEPER	12	26	39	4.8e-06	82951.8	Hypothetical protein
Q59U87	Q59U87_CANAL	470.752	2	SLsLLSIK	0.109	SLsLLSIK	181	188	29.3	2.5e-05	82951.8	Hypothetical protein
Q59U87	Q59U87_CANAL	675.591	3	NGNDEsDFDDsPISKPK			27	43	24.8	0.0023	82951.8	Hypothetical protein
Q59U89	Q59U89_CANAL	705.985	3	GAEGILDEAAKsDLENEFK	NA		61	79	47.1	2e-06	13138.8	Hypothetical protein
Q59U89	Q59U89_CANAL	708.299	3	TGSIGEIGGSHNDsIGNGDAAN	0.001		100	121	22.9	0.027	13138.8	Hypothetical protein
Q59UD3	Q59UD3_CANAL	916.412	2	qKLENELSIsPEPER	0.001		12	26	38.7	3.2e-07	82906.8	Hypothetical protein
Q59UD3	Q59UD3_CANAL	796.852	2	LENELSIsPEPER	0.094	LENELSIsPEPER	14	26	49.7	7.4e-07	82906.8	Hypothetical protein
Q59UD3	Q59UD3_CANAL	638.933	3	NGNDEsDFDDGPISKPK	0.189	NGNDEsDFDDGPISKPK	27	43	34.1	2.8e-06	82906.8	Hypothetical protein
Q59UD3	Q59UD3_CANAL	616.97	3	QKLENELSIsPEPER	0.022	QKLENELSIsPEPER	12	26	39	4.8e-06	82906.8	Hypothetical protein
Q59UD9	Q59UD9_CANAL	840.355	2	GGsYSVATDEVNSWK	0.01		237	251	33.6	4.4e-05	53687.7	Hypothetical protein
Q59UE1	Q59UE1_CANAL	531.899	3	HNtPsPLNTSHTK			237	249	28.8	0.003	58827.9	Hypothetical protein
Q59UE4	Q59UE4_CANAL	463.734	2	IsLADISK	0.065	IsLADISK	11	18	32	1.7e-05	40947.2	Potential amino acyl-tRNA synthetase complex component
Q59UE4	Q59UE4_CANAL	431.877	3	AKAtPDAAQGQR	NA		149	160	39	3.1e-05	40947.2	Potential amino acyl-tRNA synthetase complex component
Q59UF3	Q59UF3_CANAL	880.885	2	LPtPSQNGTEANPVQK	0.114	LPtPSQNGTEANPVQK	110	125	25.2	0.0012	31137	Hypothetical protein
Q59UF5	Q59UF5_CANAL	791.67	3	LTQPsDEEISNNVSTEEGSEK	0.011		56	76	37.4	5.4e-07	102898	Potential GRIP domain Golgi protein
Q59UF5	Q59UF5_CANAL	767.679	3	NFsEDVINELNNLSDQNQK	0.425	NFsEDVINELNNLSDQNQK	7	25	44.5	3.2e-05	102898	Potential GRIP domain Golgi protein
Q59UF5	Q59UF5_CANAL	871.728	3	NFSEDVINELNNLSDQNQKsPK	0.053	NFSEDVINELNNLsDQNQKSPK	7	28	34.5	0.0011	102898	Potential GRIP domain Golgi protein
Q59UF5	Q59UF5_CANAL	848.061	3	LKNFsEDVINELNNLSDQNQK	0.173	LKNFsEDVINELNNLSDQNQK	5	25	27.7	0.0047	102898	Potential GRIP domain Golgi protein
Q59UF7	Q59UF7_CANAL	745.35	2	GSAFLAQsPQLYK	0.198	GSAFLAQsPQLYK	315	327	41.1	1.7e-05	65291	Probable aspartate-tRNA synthetase
Q59UF7	Q59UF7_CANAL	684.984	3	SEKEsEELGLPGVNLDTR	0		235	252	34.6	0.0002	65291	Probable aspartate-tRNA synthetase
Q59UG5	Q59UG5_CANAL	577.898	3	GIDEsDDDWSDNKR	0.042	GIDESDDDWsDNKR	493	506	38.2	5.9e-06	68220.4	DnaJ-like protein
Q59UG6	Q59UG6_CANAL	652.284	2	ITtTDSELTDK	0.016		220	230	40.8	4.5e-06	31684.4	Hypothetical protein
Q59UG6	Q59UG6_CANAL	652.28	2	ITTtDSELTDK	0		220	230	41.8	1.6e-05	31684.4	Hypothetical protein
Q59UG6	Q59UG6_CANAL	625.329	3	SFtTPTALPALHTPLVK	0.018		108	124	21.9	0.016	31684.4	Hypothetical protein
Q59UH8	Q59UH8_CANAL	817.366	3	MNQLYDNsGLLTSNDLDIDTK	0.033	MNQLYDNsGLLTSNDLDIDTK	164	184	31.1	0.00017	29261.9	Hypothetical protein
Q59UI5	Q59UI5_CANAL	781.876	2	VNTsTPPPPGLFAGK	0		508	522	43.7	6.2e-09	62731.8	Potential mRNA deadenylase and CCR4-NOT complex subunit Mot2p
Q59UI5	Q59UI5_CANAL	674.653	3	TsDRVNTSTPPPPGLFAGK	0.005		504	522	24.5	0.0022	62731.8	Potential mRNA deadenylase and CCR4-NOT complex subunit Mot2p
Q59UN9	Q59UN9_CANAL	928.448	2	RWmIImLFFSLSVt	0.071	RWmIImLFFSLSVt	87	100	23.8	0.019	11260.3	Hypothetical protein
Q59UP5	Q59UP5_CANAL	461.22	2	LEsLHSR	0.036	LEsLHSR	84	90	25.6	0.0016	125032	Hypothetical protein RIS1
Q59UQ0	Q59UQ0_CANAL	650.645	3	DSVMAPLASQDTGHsLLK	0.009		558	575	58.5	4.6e-12	90135.4	Hypothetical protein
Q59UQ0	Q59UQ0_CANAL	655.979	3	DSVmAPLASQDtGHSLLK	0.005		558	575	39.2	8e-09	90135.4	Hypothetical protein
Q59UQ0	Q59UQ0_CANAL	699.637	3	sEQNVFGQMPDPNLSPEK	0.597	sEQNVFGQMPDPNLSPEK	503	520	42.5	1.6e-08	90135.4	Hypothetical protein
Q59UQ0	Q59UQ0_CANAL	587.278	3	DSALFHNLPAASHsGR	0.042	DSALFHNLPAASHsGR	542	557	47.4	3.9e-08	90135.4	Hypothetical protein
Q59UQ0	Q59UQ0_CANAL	726.304	3	sEQNVFGQMPDPNLsPEK			503	520	42.5	1.3e-07	90135.4	Hypothetical protein
Q59UQ0	Q59UQ0_CANAL	699.641	3	SEQNVFGQMPDPNLsPEK	0.444	SEQNVFGQMPDPNLsPEK	503	520	41.4	1.5e-07	90135.4	Hypothetical protein
Q59UQ0	Q59UQ0_CANAL	704.966	3	sEQNVFGQmPDPNLSPEK	0.4	sEQNVFGQmPDPNLSPEK	503	520	42.6	2.1e-07	90135.4	Hypothetical protein
Q59UQ0	Q59UQ0_CANAL	491.221	3	FHRDEsSTGISR	0.001		323	334	41.6	3e-07	90135.4	Hypothetical protein
Q59UQ0	Q59UQ0_CANAL	832.019	3	QSSDGIYSFEAGDDSNPISAtPR	0.085	QSSDGIYSFEAGDDSNPISAtPR	480	502	48.7	4.5e-07	90135.4	Hypothetical protein
Q59UQ0	Q59UQ0_CANAL	939.728	3	SRQssDGIYSFEAGDDSNPISATPR			478	502	42	9e-07	90135.4	Hypothetical protein
Q59UQ0	Q59UQ0_CANAL	827.678	3	FTGADSIAEDEsLSEVsLPPTR			281	302	39.9	1.5e-06	90135.4	Hypothetical protein
Q59UQ0	Q59UQ0_CANAL	801.033	3	FTGADSIAEDEsLSEVSLPPTR	0.002		281	302	41.5	3.4e-06	90135.4	Hypothetical protein
Q59UQ0	Q59UQ0_CANAL	913.059	3	SRQsSDGIYSFEAGDDSNPISATPR	0.002		478	502	37.8	5.8e-06	90135.4	Hypothetical protein
Q59UQ0	Q59UQ0_CANAL	432.881	3	VLHHEEPtVR	NA		532	541	34	5.9e-06	90135.4	Hypothetical protein
Q59UQ0	Q59UQ0_CANAL	832.014	3	QSsDGIYSFEAGDDSNPISATPR	0		480	502	41.6	8.2e-06	90135.4	Hypothetical protein
Q59UQ0	Q59UQ0_CANAL	677.299	3	DSVMAPLASQDtGHsLLK			558	575	35.2	1.5e-05	90135.4	Hypothetical protein
Q59UQ0	Q59UQ0_CANAL	516.209	2	DEsSTGISR	0.096	DEsSTGISR	326	334	38.5	9.7e-05	90135.4	Hypothetical protein
Q59UQ0	Q59UQ0_CANAL	515.761	2	SKVGsIFGR	0.305	SKVGsIFGR	266	274	30.7	0.00015	90135.4	Hypothetical protein
Q59UQ0	Q59UQ0_CANAL	550.268	2	TRNsSVLSR	0.017		303	311	36.1	0.00021	90135.4	Hypothetical protein
Q59UQ0	Q59UQ0_CANAL	704.974	3	SEQNVFGQmPDPNLsPEK	0.295	SEQNVFGQmPDPNLsPEK	503	520	26.1	0.00028	90135.4	Hypothetical protein
Q59UQ0	Q59UQ0_CANAL	801.03	3	FTGADSIAEDESLSEVsLPPTR	0.002		281	302	32.1	0.00063	90135.4	Hypothetical protein
Q59UQ0	Q59UQ0_CANAL	491.221	3	FHRDESSTGIsR	0.009		323	334	30.5	0.00068	90135.4	Hypothetical protein
Q59UQ0	Q59UQ0_CANAL	408.195	2	VGsIFGR	NA		268	274	25.7	0.00094	90135.4	Hypothetical protein
Q59UQ0	Q59UQ0_CANAL	682.633	3	DSVmAPLAsQDTGHsLLK			558	575	25.6	0.0011	90135.4	Hypothetical protein
Q59UQ0	Q59UQ0_CANAL	441.729	2	RGsLLEK	NA		446	452	28.8	0.0015	90135.4	Hypothetical protein
Q59UQ0	Q59UQ0_CANAL	826.346	3	qSSDGIYSFEAGDDSNPIsATPR	0		480	502	34.1	0.0015	90135.4	Hypothetical protein
Q59UQ0	Q59UQ0_CANAL	421.699	2	NSsVLSR	0.052	NSsVLSR	305	311	23.1	0.0021	90135.4	Hypothetical protein
Q59UQ0	Q59UQ0_CANAL	445.201	2	RNsSFAK	0.258	RNSsFAK	245	251	23.7	0.0034	90135.4	Hypothetical protein
Q59UQ0	Q59UQ0_CANAL	445.207	2	RNSsFAK	0.252	RNSsFAK	245	251	23.9	0.007	90135.4	Hypothetical protein
Q59UQ0	Q59UQ0_CANAL	550.274	2	tRNSSVLSR	0.013		303	311	29.7	0.0095	90135.4	Hypothetical protein
Q59UQ0	Q59UQ0_CANAL	826.348	3	qSsDGIYSFEAGDDSNPISATPR	0.003		480	502	24.3	0.027	90135.4	Hypothetical protein
Q59UQ0	Q59UQ0_CANAL	516.551	3	NSSFAKSEKSAsPK	0.201	NSSFAKSEKSAsPK	246	259	19.9	0.031	90135.4	Hypothetical protein
Q59UQ0	Q59UQ0_CANAL	677.29	3	DsVMAPLASQDTGHsLLK			558	575	23.7	0.046	90135.4	Hypothetical protein
Q59UQ1	Q59UQ1_CANAL	651.97	3	EANIKPAtDDEATEIEK	0.227	EANIKPAtDDEATEIEK	131	147	42.3	4.1e-06	21381.4	Hypothetical protein YET1
Q59UQ3	Q59UQ3_CANAL	736.696	3	RSsTIEDPISPTAVAIDIDK	0		104	123	47.4	3.2e-06	90615.5	Hypothetical protein MNR2
Q59UQ3	Q59UQ3_CANAL	557.24	3	SFDWANAHSsPTNR	0.001		57	70	36.4	9.8e-06	90615.5	Hypothetical protein MNR2
Q59UQ3	Q59UQ3_CANAL	888.378	3	HMsFTATNYVPTDDQSPDSSNLR	0.007		7	29	34.3	1.3e-05	90615.5	Hypothetical protein MNR2
Q59UQ3	Q59UQ3_CANAL	557.237	3	SFDWANAHSSPtNR	0		57	70	30.4	3.6e-05	90615.5	Hypothetical protein MNR2
Q59UQ3	Q59UQ3_CANAL	597.317	3	RLSsYLEKPTSTSIK	0.005		475	489	31.6	6.3e-05	90615.5	Hypothetical protein MNR2
Q59UQ3	Q59UQ3_CANAL	678.687	3	LSSYLEKPTSTSIKsQGK	0.001		476	493	29.3	7.5e-05	90615.5	Hypothetical protein MNR2
Q59UQ3	Q59UQ3_CANAL	557.235	3	sFDWANAHSSPTNR	0.356	sFDWANAHSSPTNR	57	70	33.8	8.7e-05	90615.5	Hypothetical protein MNR2
Q59UQ3	Q59UQ3_CANAL	599.931	3	KsFDWANAHSSPTNR	0.251	KsFDWANAHSSPTNR	56	70	30.8	0.00015	90615.5	Hypothetical protein MNR2
Q59UQ3	Q59UQ3_CANAL	689.945	3	LQDMYENGSDNGStLESK	0.02		443	460	32.7	0.00064	90615.5	Hypothetical protein MNR2
Q59UQ3	Q59UQ3_CANAL	888.377	3	HMSFTATNyVPTDDQSPDSSNLR	0.009		7	29	30	0.0011	90615.5	Hypothetical protein MNR2
Q59UQ3	Q59UQ3_CANAL	663.952	3	sRPEtPTPSSVNDSLSR			350	366	19.4	0.016	90615.5	Hypothetical protein MNR2
Q59UQ8	Q59UQ8_CANAL	884.725	3	ISFSDQGFSIGDSEYNAPGsPIKR	0.062	ISFSDQGFSIGDSEYNAPGsPIKR	14	37	35.1	7.2e-05	52265.3	Hypothetical protein PEP7
Q59UQ8	Q59UQ8_CANAL	470.884	3	TEIPRtPsPPR			370	380	25.6	0.00025	52265.3	Hypothetical protein PEP7
Q59UQ8	Q59UQ8_CANAL	563.731	2	Acetyl-MQTSStPPR	0.001		1	9	18.9	0.014	52265.3	Hypothetical protein PEP7
Q59UR3	Q59UR3_CANAL	746.012	3	TSNSVNNSPNVSsPFHNTPR	0		352	371	33.4	8.3e-06	111197	Hypothetical protein (Filamentous growth regulator)
Q59UR3	Q59UR3_CANAL	843.04	3	qPsPMNSAGHNTQQNTPITQNAK	0.011		155	177	34.4	0.00021	111197	Hypothetical protein (Filamentous growth regulator)
Q59UR3	Q59UR3_CANAL	772.655	3	TSNsVNNsPNVSSPFHNTPR			352	371	28.1	0.00027	111197	Hypothetical protein (Filamentous growth regulator)
Q59US3	Q59US3_CANAL	826.713	3	LLCACNFPSIAVHsGLPQEER	0.031	LLCACNFPSIAVHsGLPQEER	169	189	27	0.00073	33451.6	Hypothetical protein SUB2
Q59US3	Q59US3_CANAL	536.767	2	IQsRFDVK	NA		266	273	31.1	0.0023	33451.6	Hypothetical protein SUB2
Q59US5	Q59US5_CANAL	663.641	3	HGAQLFGLEtPGYIYSR	0.091	HGAQLFGLEtPGYIYSR	40	56	35.7	1.8e-05	47988.4	O-acetylhomoserine O-acetylserine sulphydrylase
Q59US5	Q59US5_CANAL	618.617	3	APPIYATTsYVFNDSK	0		24	39	23.6	0.0012	47988.4	O-acetylhomoserine O-acetylserine sulphydrylase
Q59US8	Q59US8_CANAL	571.913	3	TVsNLEEWDSYYK	0.002		81	93	39.8	3.8e-08	15682.6	Hypothetical protein
Q59US8	Q59US8_CANAL	894.401	3	AVsEGYKLPGDNTASQQFSGNFQR	0.025	AVsEGYKLPGDNTASQQFSGNFQR	37	60	43.8	2.9e-06	15682.6	Hypothetical protein
Q59US8	Q59US8_CANAL	711.661	3	VPLPSsMTGPPDLVNGQSTR	0.145	VPLPSSMtGPPDLVNGQSTR	61	80	31.9	0.00029	15682.6	Hypothetical protein
Q59US9	Q59US9_CANAL	812.706	3	TLGVISMSTDPDATtNFGPYLR	0		152	173	37.2	1.3e-05	47324.7	Hypothetical protein CAR2
Q59US9	Q59US9_CANAL	452.18	2	Acetyl-SStPDFK	0.021	MSStPDFK	1	8	23.2	0.00038	47324.7	Hypothetical protein CAR2
Q59UT6	Q59UT6_CANAL	563.298	2	KNsIIEITK	0.191	KNsIIEITK	477	485	42.4	1.3e-05	64706	Ferric reductase-like protein
Q59UZ0	Q59UZ0_CANAL	715.335	2	SSTISTIVEsPTK	0.059	SSTISTIVEsPTK	517	529	49.2	5.7e-07	110118	Likely protein kinase
Q59UZ0	Q59UZ0_CANAL	833.383	2	SASISNSYsSASIALK	0.009		480	495	48.9	3.8e-06	110118	Likely protein kinase
Q59UZ0	Q59UZ0_CANAL	833.384	2	SAsISNSYSSASIALK	0.009		480	495	35.3	4.8e-06	110118	Likely protein kinase
Q59UZ0	Q59UZ0_CANAL	664.289	2	TNsSSLMSPAPR	0.02		388	399	33	1.2e-05	110118	Likely protein kinase
Q59UZ0	Q59UZ0_CANAL	702.324	2	RNsVLSYLEDK	0.039	RNsVLSYLEDK	659	669	40.8	1.7e-05	110118	Likely protein kinase
Q59UZ0	Q59UZ0_CANAL	576.942	3	LHNHQQsQQYIPR	0.126	LHNHQQsQQYIPR	504	516	29.3	0.00069	110118	Likely protein kinase
Q59UZ6	Q59UZ6_CANAL	467.879	3	DFNRStPDITR	0.032	DFNRsTPDITR	628	638	27.9	8.5e-05	84187.4	Hypothetical protein
Q59UZ6	Q59UZ6_CANAL	494.536	3	DFNRstPDITR			628	638	27.4	0.0046	84187.4	Hypothetical protein
Q59V03	Q59V03_CANAL	518.264	3	VGSHANsLDKFIGK	0.021	VGSHANsLDKFIGK	746	759	34.7	9.7e-07	90314.3	Hypothetical protein
Q59V03	Q59V03_CANAL	622.3	2	SSsLLNTISNK	0.002		459	469	40.1	1.4e-06	90314.3	Hypothetical protein
Q59V03	Q59V03_CANAL	849.364	3	AEsVESsDRFGTATIITSSNNSL			771	793	39.3	1.5e-06	90314.3	Hypothetical protein
Q59V03	Q59V03_CANAL	548.251	3	SSsLENATATPGHYK	0.04	SSsLENATATPGHYK	553	567	40.2	4.7e-06	90314.3	Hypothetical protein
Q59V03	Q59V03_CANAL	662.278	2	SssLLNTISNK			459	469	31.4	8.8e-06	90314.3	Hypothetical protein
Q59V03	Q59V03_CANAL	594.233	2	VGsHANsLDK			746	755	31.8	1.1e-05	90314.3	Hypothetical protein
Q59V03	Q59V03_CANAL	753.333	2	FGTATIITSSNNsL	0.027	FGTATIITSSNNsL	780	793	38	1.9e-05	90314.3	Hypothetical protein
Q59V03	Q59V03_CANAL	589.284	3	TNsIDKVGSHANSLDK	0.017		740	755	37.9	2.1e-05	90314.3	Hypothetical protein
Q59V03	Q59V03_CANAL	671.667	3	VFDYLLAIANYSTsSIR	0.004		92	108	32	3e-05	90314.3	Hypothetical protein
Q59V03	Q59V03_CANAL	549.769	2	TTsIQILDK	0.051	TTsIQILDK	629	637	35.9	6.7e-05	90314.3	Hypothetical protein
Q59V03	Q59V03_CANAL	551.621	3	TNSFIsKVSPIHSR	0.002		537	550	24.5	0.00048	90314.3	Hypothetical protein
Q59V03	Q59V03_CANAL	660.615	3	tRSSSLENAtATPGHYK			551	567	26	0.0007	90314.3	Hypothetical protein
Q59V03	Q59V03_CANAL	660.615	3	tRSSsLENATATPGHYK			551	567	30	0.001	90314.3	Hypothetical protein
Q59V03	Q59V03_CANAL	578.273	3	TNsFISKVsPIHSR			537	550	24.8	0.0036	90314.3	Hypothetical protein
Q59V03	Q59V03_CANAL	456.904	3	NRtTSIQILDK	0.076	NRtTSIQILDK	627	637	28.3	0.006	90314.3	Hypothetical protein
Q59V03	Q59V03_CANAL	791.012	3	TNsIDKVGsHANsLDKFIGK			740	759	26	0.0071	90314.3	Hypothetical protein
Q59V03	Q59V03_CANAL	622.303	2	SSSLLNtISNK	0		459	469	27.6	0.0077	90314.3	Hypothetical protein
Q59V03	Q59V03_CANAL	438.216	2	VsPIHSR	0.127	VsPIHSR	544	550	16.2	0.0079	90314.3	Hypothetical protein
Q59V03	Q59V03_CANAL	549.577	3	sRSSSLLNtIsNK			457	469	23.3	0.022	90314.3	Hypothetical protein
Q59V03	Q59V03_CANAL	522.903	3	SRsSsLLNTISNK			457	469	23.9	0.033	90314.3	Hypothetical protein
Q59V03	Q59V03_CANAL	496.251	3	SRSSsLLNTISNK	0.007		457	469	19.8	0.048	90314.3	Hypothetical protein
Q59V12	Q59V12_CANAL	724.385	3	RGsISSPIKPSPLSLPQNGR	0.015		507	526	45	5.7e-09	98711.9	Hypothetical protein
Q59V12	Q59V12_CANAL	544.234	3	SDQLLHEEsMSFK	0.027	SDQLLHEEsMSFK	847	859	48.6	3.2e-08	98711.9	Hypothetical protein
Q59V12	Q59V12_CANAL	613.935	3	SSsVSSITSNGSSSGLmR	0		489	506	39.5	2.6e-06	98711.9	Hypothetical protein
Q59V12	Q59V12_CANAL	912.392	2	SSsVSSITSNGSSSGLMR	0.005		489	506	34.5	3.2e-06	98711.9	Hypothetical protein
Q59V12	Q59V12_CANAL	469.712	2	SNsQPIGR	0.053	SNsQPIGR	577	584	33.1	8.8e-06	98711.9	Hypothetical protein
Q59V12	Q59V12_CANAL	469.71	2	sNSQPIGR	0.048	SNsQPIGR	577	584	30.4	9.3e-05	98711.9	Hypothetical protein
Q59V12	Q59V12_CANAL	716.304	3	SRSSsVSsITSNGSSSGLMR			487	506	23.6	0.014	98711.9	Hypothetical protein
Q59V18	Q59V18_CANAL	734.656	3	IDNNsTPQSQSNSIQDVFK	0		816	834	28.5	7.8e-05	95417.8	Hypothetical protein FAP1
Q59V20	Q59V20_CANAL	631.323	3	sSALAIVEPLPETILMK	0		377	393	44.1	8.7e-08	81608.1	Hypothetical protein
Q59V20	Q59V20_CANAL	402.174	2	MAsMKR	NA		369	374	24	0.0039	81608.1	Hypothetical protein
Q59V42	Q59V42_CANAL	614.631	3	IPALDQLQDETYsLR	0.008		103	117	39.8	2e-06	110177	Likely voltage-gated chloride channel
Q59V55	Q59V55_CANAL	723.331	3	IDNNsTPQSQSNLIQDVSK	0.011		820	838	33	0.00075	95815.3	Hypothetical protein FAP1
Q59V64	Q59V64_CANAL	557.911	3	NYDDsKILFDFSK	0.045	NYDDsKILFDFSK	49	61	21.8	0.0063	61186.8	Hypothetical protein PGI1
Q59V66	Q59V66_CANAL	566.773	2	IPNAPQsPTK	0.064	IPNAPQsPTK	20	29	48.3	1.6e-07	53307.4	Hypothetical protein
Q59V66	Q59V66_CANAL	846.388	2	EAtPDVQQVAETVPK	0.13	EAtPDVQQVAETVPK	375	389	24.2	0.0022	53307.4	Hypothetical protein
Q59V66	Q59V66_CANAL	606.756	2	IPNAPQsPtK			20	29	17.1	0.047	53307.4	Hypothetical protein
Q59V78	Q59V78_CANAL	594.657	3	RLsVVDFVSSLRPAR	0.127	RLsVVDFVSSLRPAR	169	183	38.9	1.4e-08	68940.6	Hypothetical protein
Q59V78	Q59V78_CANAL	563.57	3	HHsFSANEFYQNK	0		93	105	34.5	5.6e-06	68940.6	Hypothetical protein
Q59V78	Q59V78_CANAL	703.643	3	AAsPDNLNGDELQATDLER	0.489	AAsPDNLNGDELQATDLER	265	283	39	4.2e-05	68940.6	Hypothetical protein
Q59V78	Q59V78_CANAL	559.913	3	SSMEsLGEFGELRR	0.034	SSMEsLGEFGELRR	156	169	26.1	0.0013	68940.6	Hypothetical protein
Q59V78	Q59V78_CANAL	828.317	3	NYGSDVNESLGDIAEGsHESsR			243	264	27.8	0.0013	68940.6	Hypothetical protein
Q59V78	Q59V78_CANAL	419.871	3	SPKTAIGSDsSK	0		23	34	23.2	0.022	68940.6	Hypothetical protein
Q59V78	Q59V78_CANAL	419.87	3	SPKTAIGSDSsK	0		23	34	16.8	0.033	68940.6	Hypothetical protein
Q59V80	Q59V80_CANAL	854.349	2	ATtPIsNDDPLIYK			24	37	27.4	1.6e-05	30195.5	Hypothetical protein
Q59V80	Q59V80_CANAL	814.372	2	ATtPISNDDPLIYK	0.012		24	37	26.6	2.6e-05	30195.5	Hypothetical protein
Q59V82	Q59V82_CANAL	827.85	2	Acetyl-sEYDKYSTPLSSR	0.003		1	14	27.1	0.00053	54440.9	Hypothetical protein ADE13
Q59V83	Q59V83_CANAL	676.974	3	TLSsQSSPQLPLMSESEK	0.005		39	56	33.9	3e-05	66156.8	Hypothetical protein
Q59V83	Q59V83_CANAL	413.198	2	GTItPTR	0.003		32	38	27.5	0.00018	66156.8	Hypothetical protein
Q59V83	Q59V83_CANAL	669.338	3	SsSVQDGVIGLLRPVNER	0.006		549	566	26.3	0.0026	66156.8	Hypothetical protein
Q59V85	Q59V85_CANAL	539.753	2	AEtLVSNHK	0.28	AEtLVSNHK	50	58	31.6	1.7e-05	33952.1	Potential L7-like nucleolar rRNA maturation factor
Q59V98	Q59V98_CANAL	843.052	3	sNSVSSTNLSGSSTNTNPVNNLPR	0		192	215	50.7	1.6e-08	69698.2	Potential protein kinase Sat4
Q59V98	Q59V98_CANAL	632.975	3	IFSsSSNLAQLEHQQK	0.017		7	22	42.1	6.4e-07	69698.2	Potential protein kinase Sat4
Q59V98	Q59V98_CANAL	564.977	3	LLSKQsPPQPPPPVK	0		35	49	18.5	0.0083	69698.2	Potential protein kinase Sat4
Q59V98	Q59V98_CANAL	635.783	4	Acetyl-mGVLGKIFSsSSNLAQLEHQQK			1	22	24.3	0.036	69698.2	Potential protein kinase Sat4
Q59VF0	Q59VF0_CANAL	888.378	3	SSNNFDEHSDsVPLISDSNIYSR	0.005		62	84	35.6	4.9e-05	126519	Hypothetical protein NEO1 (Fragment)
Q59VF0	Q59VF0_CANAL	892.055	3	Acetyl-SsSKPYSFVGRDSFDDLDSSLDK	0		1	24	35.2	8.4e-05	126519	Hypothetical protein NEO1 (Fragment)
Q59VF0	Q59VF0_CANAL	737.35	2	SISSSsTSLNIAAR	0.006		89	102	30.6	0.0043	126519	Hypothetical protein NEO1 (Fragment)
Q59VF0	Q59VF0_CANAL	718.771	2	DSFDDLDSsLDK	0.033	DsFDDLDSSLDK	13	24	26	0.0058	126519	Hypothetical protein NEO1 (Fragment)
Q59VF6	Q59VF6_CANAL	654.801	2	FFGsGGLSSTIR	0.077	FFGsGGLSSTIR	32	43	46.4	2.9e-08	34607.7	Possible sphingolipid long chain base sensory protein
Q59VF6	Q59VF6_CANAL	551.225	2	TYsLRsSK			4	11	25.2	0.0001	34607.7	Possible sphingolipid long chain base sensory protein
Q59VF6	Q59VF6_CANAL	521.731	2	YKDPQsPK	0.431	YKDPQsPK	158	165	29.7	0.00014	34607.7	Possible sphingolipid long chain base sensory protein
Q59VF6	Q59VF6_CANAL	624.296	3	APTASQLQSPPPPPSStK	0.01		12	29	27.2	0.00015	34607.7	Possible sphingolipid long chain base sensory protein
Q59VF6	Q59VF6_CANAL	705.017	3	APTASQLQSPPPPPSStKNK	0		12	31	36	0.00036	34607.7	Possible sphingolipid long chain base sensory protein
Q59VF6	Q59VF6_CANAL	472.256	2	KLsQFIK	NA		57	63	26.4	0.0012	34607.7	Possible sphingolipid long chain base sensory protein
Q59VF6	Q59VF6_CANAL	751.683	3	SsKAPtASQLQSPPPPPSSTK			9	29	30.9	0.0014	34607.7	Possible sphingolipid long chain base sensory protein
Q59VF6	Q59VF6_CANAL	624.301	3	APTAsQLQSPPPPPSSTK	0		12	29	28.5	0.0015	34607.7	Possible sphingolipid long chain base sensory protein
Q59VF6	Q59VF6_CANAL	479.577	3	FFGSGGLSsTIRK	0.033	FFGSGGLSStIRK	32	44	21.4	0.017	34607.7	Possible sphingolipid long chain base sensory protein
Q59VG1	Q59VG1_CANAL	485.561	3	DFHADMStPLLK	0.054	DFHADMStPLLK	402	413	32.9	6.5e-06	47491.4	Hypothetical protein LYS212
Q59VG1	Q59VG1_CANAL	490.886	3	DFHADmStPLLK	0.005		402	413	21.3	0.0088	47491.4	Hypothetical protein LYS212
Q59VG8	Q59VG8_CANAL	744.014	3	KPtSGLAFGATNAQSNTTNNR	0		442	462	39.7	2.8e-06	65252.5	Hypothetical protein
Q59VH2	Q59VH2_CANAL	643.79	2	NINSTCsIGLK	0.024	NINSTCsIGLK	160	170	34.8	9.1e-07	78312.4	Hypothetical protein
Q59VH2	Q59VH2_CANAL	822.846	2	ESsLMDVTNLDANR	0.001		468	481	39.7	1.6e-05	78312.4	Hypothetical protein
Q59VH2	Q59VH2_CANAL	847.36	3	NVsQNNsYQPDQTIFNNLQR			363	382	36.7	2.7e-05	78312.4	Hypothetical protein
Q59VH2	Q59VH2_CANAL	554.915	3	DSQPPPFHNsTVTR	0.001		33	46	31.5	3.1e-05	78312.4	Hypothetical protein
Q59VH2	Q59VH2_CANAL	542.786	2	SKsTEVLLK	0.033	SKsTEVLLK	109	117	31.3	3.6e-05	78312.4	Hypothetical protein
Q59VH2	Q59VH2_CANAL	550.745	2	MTALQPMtK	0.213	MTALQPMtK	134	142	30.1	0.00054	78312.4	Hypothetical protein
Q59VH2	Q59VH2_CANAL	721.298	3	tNNSTSSADSQYGHNIETR	0		440	458	29.4	0.0011	78312.4	Hypothetical protein
Q59VH2	Q59VH2_CANAL	620.648	3	ILPEPTPAsEEPPKFK	0.013		239	254	25.1	0.0031	78312.4	Hypothetical protein
Q59VH2	Q59VH2_CANAL	582.766	2	SKstEVLLK			109	117	22	0.0086	78312.4	Hypothetical protein
Q59VH2	Q59VH2_CANAL	417.204	3	TTsSPTLPTHK	0		143	153	19	0.028	78312.4	Hypothetical protein
Q59VH4	Q59VH4_CANAL	663.661	3	NLIVSDsKYDLNALESK	0		577	593	45	2e-06	104295	Hypothetical protein SEC21
Q59VH4	Q59VH4_CANAL	492.734	2	VIsSEELK	0.019		615	622	28.5	0.0027	104295	Hypothetical protein SEC21
Q59VH9	Q59VH9_CANAL	424.223	2	VIVPsPR	NA		64	70	20.1	0.00011	44357.6	Hypothetical protein
Q59VN4	Q59VN4_CANAL	568.248	2	QGRtLYGFGG	0.012		96	105	19.9	0.013	11620.7	Histone H4
Q59VP7	Q59VP7_CANAL	590.628	3	SLSVSDPSIQKNsISK	0.017		133	148	37.9	2.8e-05	97379.9	Hypothetical protein
Q59VP7	Q59VP7_CANAL	612.268	2	WLQEsPIDR	NA		376	384	34.9	0.00029	97379.9	Hypothetical protein
Q59VQ7	Q59VQ7_CANAL	668.3	2	Acetyl-sFSFGINNISK	0.007		1	12	29.9	2.4e-05	70209.8	Hypothetical protein MNS1
Q59VQ8	Q59VQ8_CANAL	584.609	3	LPsISNTVHYSSNPR	0.068	LPsISNTVHYSSNPR	877	891	36.3	7.6e-06	105997	Potential fungal zinc cluster transcription factor
Q59VR0	Q59VR0_CANAL	696.819	2	qELQSLQIQsR	0.104	qELQSLQIQsR	188	198	45.4	2.3e-07	67157.6	Hypothetical protein STR2
Q59VR0	Q59VR0_CANAL	881.39	3	ASSAAGYNIDDVNRDFDsFIEQK	0.046	ASSAAGYNIDDVNRDFDsFIEQK	207	229	31	0.00015	67157.6	Hypothetical protein STR2
Q59VR0	Q59VR0_CANAL	442.702	2	SPsISASR	0.046	SPsISASR	199	206	19.1	0.011	67157.6	Hypothetical protein STR2
Q59VR2	Q59VR2_CANAL	795.67	3	SVQEIPDNEDESsDEELEIK	0.004		574	593	32.4	0.00067	116419	Hypothetical protein HMG1
Q59VR2	Q59VR2_CANAL	822.323	3	SVQEIPDNEDEssDEELEIK			574	593	28.5	0.0044	116419	Hypothetical protein HMG1
Q59VR3	FKBP3_CANAL	784.359	2	ELEQGPtGSTLVEK	0.051	ELEQGPtGSTLVEK	276	289	47.6	5.8e-05	47668.3	FK506-binding protein 3 (EC 5.2.1.8) (Peptidyl-prolyl cis-trans isomerase) (PPIase) (Rotamase)
Q59VR3	FKBP3_CANAL	388.175	2	sVQFSK	0.507	sVQFSK	270	275	23.6	0.002	47668.3	FK506-binding protein 3 (EC 5.2.1.8) (Peptidyl-prolyl cis-trans isomerase) (PPIase) (Rotamase)
Q59VW4	Q59VW4_CANAL	676.282	2	SNNsYGSLNTSK	0.005		975	986	42	2.1e-06	137231	Hypothetical protein
Q59VW4	Q59VW4_CANAL	492.211	2	sFFDLFK	NA		673	679	28.8	0.00034	137231	Hypothetical protein
Q59VW4	Q59VW4_CANAL	753.949	3	TLsYNHQLDEDEDNDDEK	0.002		494	511	28.5	0.0004	137231	Hypothetical protein
Q59VW4	Q59VW4_CANAL	608.264	2	ENGsSSISLNK	0		761	771	24.8	0.0064	137231	Hypothetical protein
Q59VW4	Q59VW4_CANAL	695.839	2	ELIDsPTPTPLK	0.043	ELIDsPTPTPLK	422	433	22.6	0.012	137231	Hypothetical protein
Q59VW4	Q59VW4_CANAL	636.306	3	LYQLStGSAVDINNFGK	0.002		622	638	21.6	0.031	137231	Hypothetical protein
Q59VW4	Q59VW4_CANAL	575.252	4	KIsDEFSCHDDQIENRPK	0.019		520	537	21.9	0.042	137231	Hypothetical protein
Q59VW4	Q59VW4_CANAL	506.938	3	ELIDsPTPTPLKK			422	434	17.6	0.046	137231	Hypothetical protein
Q59VW8	Q59VW8_CANAL	546.246	3	MsDITGIDAVHNQR	0.114	MsDITGIDAVHNQR	78	91	52.2	6.6e-08	38002.9	Hypothetical protein
Q59VW8	Q59VW8_CANAL	551.583	3	msDITGIDAVHNQR	0.166	msDITGIDAVHNQR	78	91	42	2.6e-07	38002.9	Hypothetical protein
Q59VW8	Q59VW8_CANAL	603.614	3	RmsDITGIDAVHNQR	0.021	RmsDITGIDAVHNQR	77	91	41.7	1.8e-06	38002.9	Hypothetical protein
Q59VW8	Q59VW8_CANAL	598.281	3	RMsDITGIDAVHNQR	0.021	RMsDITGIDAVHNQR	77	91	42.2	1.3e-05	38002.9	Hypothetical protein
Q59VW8	Q59VW8_CANAL	640.276	3	NPsDSLGGAQLYSTESGR	0.01		92	109	26.6	0.00026	38002.9	Hypothetical protein
Q59VW8	Q59VW8_CANAL	418.174	2	WsFTSK	0.03	WsFTSK	50	55	23.9	0.00097	38002.9	Hypothetical protein
Q59VW8	Q59VW8_CANAL	745.677	3	ANAEDDITHDLFVPSPQsAK	0.002		157	176	24.1	0.0043	38002.9	Hypothetical protein
Q59VW8	Q59VW8_CANAL	496.226	2	RWSFTsK	0.009		49	55	22	0.024	38002.9	Hypothetical protein
Q59VW8	Q59VW8_CANAL	496.22	2	RWsFTSK	0.013		49	55	19.9	0.025	38002.9	Hypothetical protein
Q59VX5	Q59VX5_CANAL	845.717	3	DHsGEKLPDINNTASTTTDPVSR	0.152	DHsGEKLPDINNTASTTTDPVSR	128	150	41	8.8e-07	41446.9	Potential ARF GAP
Q59VX5	Q59VX5_CANAL	506.268	3	GRPtPVPLTNEQK	0.414	GRPtPVPLTNEQK	151	163	33.1	0.0011	41446.9	Potential ARF GAP
Q59VX8	Q59VX8_CANAL	554.246	3	DETLTDLHSIVsNH	0.046	DETLTDLHSIVsNH	657	670	46.1	9.8e-11	75796	Hypothetical protein SHS1
Q59VX8	Q59VX8_CANAL	654.265	2	qEESATSsLHR	0.005		579	589	34.4	4.9e-06	75796	Hypothetical protein SHS1
Q59VX8	Q59VX8_CANAL	610.933	3	KDsDISGSVQSGGVDDGK	0.016		590	607	43.9	5.8e-06	75796	Hypothetical protein SHS1
Q59VX8	Q59VX8_CANAL	684.324	2	qIsETVPYVLR	0.003		516	526	33.2	5.8e-06	75796	Hypothetical protein SHS1
Q59VX8	Q59VX8_CANAL	677.324	3	LQKDETLtDLHSIVSNH	0.01		654	670	32.7	6.9e-06	75796	Hypothetical protein SHS1
Q59VX8	Q59VX8_CANAL	665.308	3	NTSVVDPDHsSPIINYR	0.004		12	28	31.9	1.5e-05	75796	Hypothetical protein SHS1
Q59VX8	Q59VX8_CANAL	703.984	3	LQKDETLtDLHsIVSNH			654	670	26	0.00019	75796	Hypothetical protein SHS1
Q59VX8	Q59VX8_CANAL	566.579	3	STSmLIDDHPSsSPK	0		444	458	26	0.00022	75796	Hypothetical protein SHS1
Q59VX8	Q59VX8_CANAL	503.763	2	RLsIGPQR	NA		504	511	30.4	0.00029	75796	Hypothetical protein SHS1
Q59VX8	Q59VX8_CANAL	521.906	3	qKQEESATSsLHR	0.003		577	589	27	0.00032	75796	Hypothetical protein SHS1
Q59VX8	Q59VX8_CANAL	587.9	3	StSMLIDDHPSsSPK			444	458	25	0.0012	75796	Hypothetical protein SHS1
Q59VX8	Q59VX8_CANAL	670.971	3	NISSFTSSTStVSLEGGEK	0		461	479	30.2	0.0028	75796	Hypothetical protein SHS1
Q59VX8	Q59VX8_CANAL	548.556	3	qKQEEsATSsLHR			577	589	19	0.0099	75796	Hypothetical protein SHS1
Q59VX8	Q59VX8_CANAL	561.246	3	STSMLIDDHPSSsPK	0		444	458	20.6	0.029	75796	Hypothetical protein SHS1
Q59VY3	Q59VY3_CANAL	548.245	2	FVLCsPHR	NA		40	47	28.7	3.1e-05	44754.5	Hypothetical protein GAL7
Q59VY3	Q59VY3_CANAL	679.007	3	Acetyl-SLDHLLNPLTSTPtYIK	0.005		1	18	23	0.0067	44754.5	Hypothetical protein GAL7
Q59VZ0	Q59VZ0_CANAL	917.933	2	SWQPTIPIAsDAELAR	0.115	SWQPTIPIAsDAELAR	505	520	45.1	1.4e-06	60389.6	Potential high affinity glucose transporter
Q59VZ6	Q59VZ6_CANAL	594.61	3	GGsVPELHENEHQLR	NA		186	200	27.8	1.1e-05	95145	Hypothetical protein PHO91
Q59VZ6	Q59VZ6_CANAL	496.69	2	sIDDYATK	0.341	sIDDYATK	204	211	28.6	0.00052	95145	Hypothetical protein PHO91
Q59W04	GON7_CANAL	891.918	2	LTPTAIYTAPDIDsPK	0.07	LTPTAIYTAPDIDsPK	3	18	29.2	3.3e-05	13420.9	Protein GON7
Q59W07	Q59W07_CANAL	779.86	2	sIGINTNNIEEFK	0.107	sIGINTNNIEEFK	582	594	45.4	3.7e-08	110924	Hypothetical protein
Q59W07	Q59W07_CANAL	717.01	3	LIDLVTHSLNsNSNSNVNK	0.025	LIDLVTHSLNSNsNSNVNK	818	836	33.4	1.1e-05	110924	Hypothetical protein
Q59W07	Q59W07_CANAL	779.864	2	SIGINtNNIEEFK	0.039	sIGINTNNIEEFK	582	594	28.3	0.00027	110924	Hypothetical protein
Q59W33	Q59W33_CANAL	751.825	2	Acetyl-TTsPYPIETPFK	0		1	13	28	0.00036	40801.1	Likely glycerol-3-phosphate dehydrogenase
Q59W33	Q59W33_CANAL	730.84	2	TTSPyPIETPFK	0.016		1	13	23.4	0.025	40801.1	Likely glycerol-3-phosphate dehydrogenase
Q59W36	Q59W36_CANAL	579.258	2	NAsMSQLAQK	0.187	NAsMSQLAQK	49	58	49.4	9.1e-07	24440.5	Likely mitochondrial ribosome protein S18 (E. coli S11)
Q59W42	Q59W42_CANAL	759.855	2	sVDPVGVAEPGGVQK	NA		70	84	49.4	7.3e-10	121809	Hypothetical protein
Q59W42	Q59W42_CANAL	754.846	2	GsPLGGLASGETNIR	0.164	GsPLGGLASGETNIR	1079	1093	38.7	8.4e-09	121809	Hypothetical protein
Q59W42	Q59W42_CANAL	673.978	3	SIGTTNVGNTNRYsVDNK	0.001		1127	1144	46.8	2.2e-08	121809	Hypothetical protein
Q59W42	Q59W42_CANAL	661.316	3	TsNKDDLVVEVIGIEDR	0		540	556	38.7	7.1e-06	121809	Hypothetical protein
Q59W42	Q59W42_CANAL	558.268	3	StDVNHIPSHATVSK	0.013		707	721	34.4	1.3e-05	121809	Hypothetical protein
Q59W42	Q59W42_CANAL	722.656	3	APSSQPAADSTHSSsPSSISGK	0.01		624	645	35	3.4e-05	121809	Hypothetical protein
Q59W42	Q59W42_CANAL	800.331	2	NIESVEEVsAAESR	0.102	NIESVEEVsAAESR	526	539	33.7	7.7e-05	121809	Hypothetical protein
Q59W42	Q59W42_CANAL	669.963	3	QDTETSTsDDEIFVNVK	0.01		748	764	29.9	0.00029	121809	Hypothetical protein
Q59W42	Q59W42_CANAL	712.648	3	KQDTETStSDDEIFVNVK	0.004		747	764	32.6	0.00045	121809	Hypothetical protein
Q59W42	Q59W42_CANAL	995.892	2	qDTETsTSDDEIFVNVK	0		748	764	30.5	0.00066	121809	Hypothetical protein
Q59W42	Q59W42_CANAL	593.293	3	GLNTTGsTNSGLHPTLK	0.006		362	378	21.8	0.04	121809	Hypothetical protein
Q59W43	Q59W43_CANAL	619.29	2	SAAsPPVSVNTK	0.026	SAAsPPVSVNTK	33	44	36.4	1.1e-06	69055	Hypothetical protein
Q59W43	Q59W43_CANAL	704.325	2	FNsVDFTTLVGK	0.093	FNsVDFTTLVGK	597	608	38.4	1.5e-05	69055	Hypothetical protein
Q59W47	Q59W47_CANAL	679.778	2	RSssLFSLSSK			41	51	30.3	7.7e-05	30761.6	Hypothetical protein CHO1
Q59W47	Q59W47_CANAL	639.807	2	RSsSLFSLSSK	0		41	51	42.3	7.8e-05	30761.6	Hypothetical protein CHO1
Q59W47	Q59W47_CANAL	561.758	2	SSsLFSLSSK	0.003		42	51	28.4	0.0014	30761.6	Hypothetical protein CHO1
Q59W48	Q59W48_CANAL	605.945	3	KtSSNGPINLtPTAVR			162	177	25.6	0.0016	32418.8	Probable microtubule-binding protein
Q59W48	Q59W48_CANAL	579.298	3	KTSsNGPINLTPTAVR	0		162	177	22.3	0.033	32418.8	Probable microtubule-binding protein
Q59W53	Q59W53_CANAL	717.65	3	DSFNLPAELQGGVsNISsR			101	119	43	1.1e-06	76378.4	Hypothetical protein PSP1
Q59W53	Q59W53_CANAL	690.997	3	DSFNLPAELQGGVSNISsR	0.003		101	119	42.3	2.1e-06	76378.4	Hypothetical protein PSP1
Q59W53	Q59W53_CANAL	679.31	3	RPsQLVDFSFSPFGDTR	0.05	RPsQLVDFSFSPFGDTR	204	220	43.2	6.5e-06	76378.4	Hypothetical protein PSP1
Q59W53	Q59W53_CANAL	455.535	3	RPsYAAESFTR	0		120	130	35.7	3.1e-05	76378.4	Hypothetical protein PSP1
Q59W53	Q59W53_CANAL	497.199	2	FNDFQsR	NA		197	203	34.1	0.0033	76378.4	Hypothetical protein PSP1
Q59W54	Q59W54_CANAL	717.972	3	sDTENTGGSPPAAEAGPKEEK	0.006		1	22	42.7	3.1e-07	11149.5	Hypothetical protein SMT3
Q59W54	Q59W54_CANAL	904.366	2	Acetyl-SDTENTGGsPPAAEAGPK	0.002		1	19	43.9	5.6e-06	11149.5	Hypothetical protein SMT3
Q59W54	Q59W54_CANAL	883.364	2	SDtENTGGSPPAAEAGPK	0		1	19	36.9	1.2e-05	11149.5	Hypothetical protein SMT3
Q59W54	Q59W54_CANAL	859.348	3	VHADQTPEDLDmDDGDtIEAHR	0.138	VHADQTPEDLDmDDGDtIEAHR	74	95	31.3	2.7e-05	11149.5	Hypothetical protein SMT3
Q59W54	Q59W54_CANAL	659.583	3	MsDTENTGGsPPAAEAGPK			1	19	25	0.00051	11149.5	Hypothetical protein SMT3
Q59W56	Q59W56_CANAL	526.926	3	STsTSPKPPAVLADK	0		326	340	29.2	8.1e-05	55228	Hypothetical protein
Q59W56	Q59W56_CANAL	469.747	2	TVsLTLPK	0.004		270	277	24.4	0.00086	55228	Hypothetical protein
Q59W62	Q59W62_CANAL	584.241	2	YSYNQsPTK	0.049	YSYNQsPTK	468	476	40.7	1.5e-05	152952	Likely protein kinase
Q59W62	Q59W62_CANAL	689.625	3	NDADPNNsEQELVDEGIK	NA		713	730	31.2	3.5e-05	152952	Likely protein kinase
Q59W62	Q59W62_CANAL	474.211	3	RTsATFAALCDK	0.018		632	643	31.1	4.5e-05	152952	Likely protein kinase
Q59W62	Q59W62_CANAL	770.37	3	LLEtSCGSPHYAAPEIVSGLK	0.003		188	208	34.2	7.5e-05	152952	Likely protein kinase
Q59W62	Q59W62_CANAL	440.77	2	KLsIIVK	NA		706	712	27.1	9.3e-05	152952	Likely protein kinase
Q59W62	Q59W62_CANAL	581.942	3	LSVLSMYSTKEsYR	0.02		933	946	34.6	0.00021	152952	Likely protein kinase
Q59W62	Q59W62_CANAL	729.32	3	qPsISSSImSQSNHNHPQK	0.037	qPsISSSImSQSNHNHPQK	6	24	25.6	0.00049	152952	Likely protein kinase
Q59W62	Q59W62_CANAL	899.837	2	SMVSDESsASDDVFDK	0		1071	1086	29.3	0.00083	152952	Likely protein kinase
Q59W62	Q59W62_CANAL	549.758	2	tSIADRLDK	0.065	TsIADRLDK	972	980	26.8	0.001	152952	Likely protein kinase
Q59W62	Q59W62_CANAL	549.764	2	TsIADRLDK	0.004		972	980	28.4	0.0012	152952	Likely protein kinase
Q59W62	Q59W62_CANAL	611.651	3	LLNsQLNVRDPLNEK	NA		888	902	24.6	0.0021	152952	Likely protein kinase
Q59W62	Q59W62_CANAL	522.749	2	AsMTTGLKR	0.029	AsMTTGLKR	595	603	23.5	0.0021	152952	Likely protein kinase
Q59W62	Q59W62_CANAL	434.233	2	RNsIIGK	NA		570	576	25.6	0.0038	152952	Likely protein kinase
Q59W62	Q59W62_CANAL	436.201	3	HsVASSANNSPR	0		434	445	24.1	0.0044	152952	Likely protein kinase
Q59W62	Q59W62_CANAL	524.239	2	NFTTsNKR	0.004		925	932	25.7	0.0059	152952	Likely protein kinase
Q59W62	Q59W62_CANAL	387.171	2	NSItMK	0.077	NSItMK	604	609	21.4	0.0062	152952	Likely protein kinase
Q59W62	Q59W62_CANAL	443.222	2	KLsWGSK	0.04	KLsWGSK	1191	1197	21.4	0.0091	152952	Likely protein kinase
Q59W62	Q59W62_CANAL	729.665	3	QPsISSSIMSQSNHNHPQK	0.01		6	24	21.7	0.0097	152952	Likely protein kinase
Q59W62	Q59W62_CANAL	444.703	2	AsMTTGLK	0.054	AsMTTGLK	595	602	22.4	0.011	152952	Likely protein kinase
Q59W62	Q59W62_CANAL	525.258	2	SAsQPVPKR	0.001		767	775	16.4	0.03	152952	Likely protein kinase
Q59W62	Q59W62_CANAL	596.631	3	ASHISVSRPTsFQYK	0.016		403	417	20.5	0.042	152952	Likely protein kinase
Q59W64	Q59W64_CANAL	558.256	2	SNsLPTTSTK	0.022	SNsLPTTSTK	296	305	31.3	5.3e-07	73474.5	Hypothetical protein
Q59W64	Q59W64_CANAL	493.245	2	MIsISNLK			171	178	31.1	0.001	73474.5	Hypothetical protein
Q59W64	Q59W64_CANAL	426.885	3	HFIsVSNLPGK	0.088	HFIsVSNLPGK	332	342	17.4	0.0025	73474.5	Hypothetical protein
Q59W64	Q59W64_CANAL	437.53	3	tIRHGDGSIFK	0.134	tIRHGDGSIFK	616	626	15.1	0.037	73474.5	Hypothetical protein
Q59W66	Q59W66_CANAL	737.952	3	IDDsDDsDIEVQTNPFNK			995	1012	43.8	2.1e-06	141441	Hypothetical protein
Q59W66	Q59W66_CANAL	922.356	2	NIVEGEAEEsEDEWK	NA		850	864	41.2	8.2e-06	141441	Hypothetical protein
Q59W66	Q59W66_CANAL	665.599	3	LLSEFsEEEDCGTNER	0.011		294	309	37.2	1.7e-05	141441	Hypothetical protein
Q59W66	Q59W66_CANAL	824.653	3	LLGGGDAsDEDENTNPDDEVSDK	0.094	LLGGGDAsDEDENTNPDDEVSDK	89	111	40.5	3.1e-05	141441	Hypothetical protein
Q59W66	Q59W66_CANAL	728.955	3	GLGGIDEEFsDVVNsDDEK			865	883	34.3	0.0001	141441	Hypothetical protein
Q59W66	Q59W66_CANAL	730.666	3	IQHGIsDGEEDIDDINVLK	NA		1080	1098	35.3	0.00029	141441	Hypothetical protein
Q59W66	Q59W66_CANAL	746.641	3	DKLLSEFsEEEDCGTNER	0.024	DKLLSEFsEEEDCGTNER	292	309	30	0.00075	141441	Hypothetical protein
Q59WB3	Q59WB3_CANAL	678.27	2	YTYEtVDQEK	0.011		50	59	42.3	1.4e-06	66478.7	Potential general amino acid permease
Q59WB3	Q59WB3_CANAL	678.758	2	qIASTsEDATDR	0.013		24	35	34.7	2.4e-06	66478.7	Potential general amino acid permease
Q59WB3	Q59WB3_CANAL	687.277	2	QIASTsEDATDR	0.001		24	35	33.6	1.9e-05	66478.7	Potential general amino acid permease
Q59WB3	Q59WB3_CANAL	678.273	2	YtYETVDQEK	0.003		50	59	34	4e-05	66478.7	Potential general amino acid permease
Q59WB3	Q59WB3_CANAL	535.898	3	SHNIHGDTSsLDSR	0.007		36	49	22.2	0.0061	66478.7	Potential general amino acid permease
Q59WB3	Q59WB3_CANAL	588.253	2	Acetyl-sYKGNDIEK	0.002		1	10	24	0.0079	66478.7	Potential general amino acid permease
Q59WB7	Q59WB7_CANAL	623.266	2	EAGsVGEFIEK	NA		203	213	32.3	5.8e-05	117840	Hypothetical protein
Q59WC0	Q59WC0_CANAL	678.304	2	TPVNAETTISsR	0		153	164	22.9	0.0011	26559.5	Hypothetical protein LYS7
Q59WC1	Q59WC1_CANAL	624.232	2	SGsISTsFSSK			233	243	38	2.2e-07	89460	Hypothetical protein
Q59WC1	Q59WC1_CANAL	584.254	2	SGsISTSFSSK	0		233	243	37.7	1.5e-06	89460	Hypothetical protein
Q59WC1	Q59WC1_CANAL	584.252	2	SGSISTsFSSK	0.007		233	243	35.5	6.3e-06	89460	Hypothetical protein
Q59WC1	Q59WC1_CANAL	595.262	2	SNtFKEIDR	0.004		339	347	36.5	4.8e-05	89460	Hypothetical protein
Q59WC1	Q59WC1_CANAL	813.859	2	qKLsINTTTDADEK	0.022	qKLsINTTTDADEK	562	575	32.3	0.00028	89460	Hypothetical protein
Q59WC1	Q59WC1_CANAL	689.642	3	SNNTAASENsPAKPQQQSK	0.021	SNNTAASENsPAKPQQQSK	402	420	32	0.001	89460	Hypothetical protein
Q59WC9	Q59WC9_CANAL	536.244	2	sKSLSQEGR	0.029	SKsLSQEGR	52	60	28.4	2.7e-05	96476.5	Potential intra-Golgi transport complex subunit 3
Q59WD5	STU1_CANAL	611.263	2	DtLDKVKsR			1280	1288	20.7	0.0069	147254	Protein STU1
Q59WD5	STU1_CANAL	470.252	3	TLSsRPSRPSLK	0		545	556	24.7	0.013	147254	Protein STU1
Q59WD8	Q59WD8_CANAL	693.991	3	KPLNVAsYTQNSYMNNR	0		478	494	33.2	3.9e-05	107317	Likely protein kinase
Q59WD8	Q59WD8_CANAL	519.568	3	sPVDmTPPIPHNR	0.033	sPVDmTPPIPHNR	435	447	27.4	8.6e-05	107317	Likely protein kinase
Q59WD8	Q59WD8_CANAL	460.868	3	FNREDFFtPK	NA		522	531	29.6	0.00024	107317	Likely protein kinase
Q59WD8	Q59WD8_CANAL	419.711	2	LSVsPQK	0.21	LSVsPQK	386	392	24	0.0004	107317	Likely protein kinase
Q59WD8	Q59WD8_CANAL	601.766	2	sVFNHYLDK	0.051	sVFNHYLDK	532	540	32.1	0.00095	107317	Likely protein kinase
Q59WD8	Q59WD8_CANAL	720.638	3	KPLNVAsYTQNsYMNNR			478	494	27.6	0.0039	107317	Likely protein kinase
Q59WD8	Q59WD8_CANAL	497.241	2	SYsTSKLK	0.004		613	620	19.6	0.011	107317	Likely protein kinase
Q59WD8	Q59WD8_CANAL	862.721	3	SNVsKPTREsIFNTLYNEAQK			93	113	19.7	0.028	107317	Likely protein kinase
Q59WD8	Q59WD8_CANAL	645.308	3	DHQLLETTSRPsSSPAK	0		57	73	18.7	0.05	107317	Likely protein kinase
Q59WE2	Q59WE2_CANAL	682.645	3	TFNIINDFsPEEEAAIR	0.272	TFNIINDFsPEEEAAIR	139	155	51.2	3.3e-08	19059.8	Hypothetical protein SKP1
Q59WE2	Q59WE2_CANAL	725.338	3	TFNIINDFsPEEEAAIRK	0.277	TFNIINDFsPEEEAAIRK	139	156	40.7	1.1e-05	19059.8	Hypothetical protein SKP1
Q59WE7	Q59WE7_CANAL	644.301	3	sNSSLISIPQRPSsLGK			389	405	40.7	1.1e-07	119218	Potential GRAM domain protein
Q59WE7	Q59WE7_CANAL	548.743	2	qITNStELK	0.032	qITNsTELK	293	301	32.3	2.4e-06	119218	Potential GRAM domain protein
Q59WE7	Q59WE7_CANAL	718.656	3	RATtPELMPNSGSLNGGDTR	0.008		360	379	35.9	2.9e-06	119218	Potential GRAM domain protein
Q59WE7	Q59WE7_CANAL	777.788	2	NsQGSSDNSFEFR	0.048	NsQGSSDNSFEFR	51	63	34.9	3e-06	119218	Potential GRAM domain protein
Q59WE7	Q59WE7_CANAL	821.817	2	MISStPPsPPPEDK			236	249	42.9	5.8e-06	119218	Potential GRAM domain protein
Q59WE7	Q59WE7_CANAL	677.304	3	SSLVDGAATASADVDsLENK	0.16	SSLVDGAATASADVDsLENK	273	292	55.9	6.2e-06	119218	Potential GRAM domain protein
Q59WE7	Q59WE7_CANAL	601.614	3	sESNGFLSSLLNAAANK	0.002		219	235	36.8	0.0017	119218	Potential GRAM domain protein
Q59WE7	Q59WE7_CANAL	615.627	3	SIHsLTHDVQFEPVR	0.003		302	316	25.6	0.0071	119218	Potential GRAM domain protein
Q59WE7	Q59WE7_CANAL	479.691	2	EELGMGsR	NA		340	347	22.1	0.0074	119218	Potential GRAM domain protein
Q59WE7	Q59WE7_CANAL	479.221	2	SADSItKR	0.048	SADsITKR	353	360	24.3	0.0096	119218	Potential GRAM domain protein
Q59WF0	Q59WF0_CANAL	661.835	2	Acetyl-SNQVLKsPLSK	0.064	MSNQVLKsPLSK	1	12	35.2	1.2e-05	32955.7	Nitrilase superfamily protein
Q59WF8	Q59WF8_CANAL	640.319	3	TSsPLPPLGFINQQPSR	0.001		255	271	25.8	0.0011	54515.3	Hypothetical protein
Q59WG3	Q59WG3_CANAL	746.346	3	qHFDASGAsAVDDKTATAILR	0.003		9	29	50.3	3.3e-08	90991.7	Hypothetical protein CDC48
Q59WG3	Q59WG3_CANAL	762.331	2	YEsYAQQLQASR	0.003		775	786	42.7	1.3e-06	90991.7	Hypothetical protein CDC48
Q59WG3	Q59WG3_CANAL	478.707	2	SVsDAELR	0.188	SVsDAELR	766	773	32.9	6.6e-05	90991.7	Hypothetical protein CDC48
Q59WG3	Q59WG3_CANAL	498.212	3	TAKRsVsDAELR			762	773	24	0.0072	90991.7	Hypothetical protein CDC48
Q59WG3	Q59WG3_CANAL	560.604	3	RYEsYAQQLQASR	0		774	786	25.1	0.0079	90991.7	Hypothetical protein CDC48
Q59WG8	Q59WG8_CANAL	593.788	2	SSsTVQLGSLK	0.002		180	190	43.3	1.4e-06	54860.3	Hypothetical protein
Q59WG8	Q59WG8_CANAL	633.765	2	SSstVQLGSLK			180	190	23.8	0.021	54860.3	Hypothetical protein
Q59WH5	Q59WH5_CANAL	632.311	2	SVSItPPLVDR	0.039	SVSItPPLVDR	150	160	42.1	1.6e-06	55553	Hypothetical protein ESC2
Q59WH5	Q59WH5_CANAL	775.88	2	NINTVQPEISLsR	0.003		137	149	42.2	1.1e-05	55553	Hypothetical protein ESC2
Q59WH5	Q59WH5_CANAL	849.657	3	IPDMEDsEEEsDHELEELLK			180	199	36.4	1.8e-05	55553	Hypothetical protein ESC2
Q59WH5	Q59WH5_CANAL	560.294	3	KNINTVQPEISLsR	0.005		136	149	27.9	0.0032	55553	Hypothetical protein ESC2
Q59WH5	Q59WH5_CANAL	645.327	3	APsSEEPVGPNLFVIGLK	0		398	415	21.7	0.026	55553	Hypothetical protein ESC2
Q59WI3	Q59WI3_CANAL	771.624	3	AYLAsDsDEsEVEKDSSIK			405	423	35	1.9e-05	77482.7	Hypothetical protein
Q59WI3	Q59WI3_CANAL	811.817	2	AYLASDsDESEVEK	0.012		405	418	40.3	2.6e-05	77482.7	Hypothetical protein
Q59WI3	Q59WI3_CANAL	744.961	3	AYLASDsDEsEVEKDSSIK			405	423	28.2	0.001	77482.7	Hypothetical protein
Q59WI3	Q59WI3_CANAL	777.034	3	IPSSYRPDSTFVTDALQHsK	0.006		354	373	24.9	0.0014	77482.7	Hypothetical protein
Q59WI3	Q59WI3_CANAL	437.237	3	LTLSsRPLSQK	0.015		386	396	25.2	0.0017	77482.7	Hypothetical protein
Q59WI3	Q59WI3_CANAL	584.586	3	SELEsNDNVHSLAEK	0.053	SELEsNDNVHSLAEK	650	664	30.9	0.0041	77482.7	Hypothetical protein
Q59WI3	Q59WI3_CANAL	665.632	3	SRsELESNDNVHSLAEK	0.007		648	664	29.3	0.0083	77482.7	Hypothetical protein
Q59WI6	Q59WI6_CANAL	660.28	2	NNLAFsPDFSK	0.092	NNLAFSPDFsK	242	252	25.1	0.00021	57289.2	Hypothetical protein RTG3
Q59WI8	Q59WI8_CANAL	765.348	3	VAsASNsDAEGLGGIPVLSDFK			234	255	42.6	3.9e-07	46580.1	Hypothetical protein
Q59WI8	Q59WI8_CANAL	738.682	3	VASAsNSDAEGLGGIPVLSDFK	0		234	255	36.4	3.9e-05	46580.1	Hypothetical protein
Q59WJ7	Q59WJ7_CANAL	591.277	2	DANVsGLIGQK	NA		120	130	34.8	1.1e-05	38439.7	Potential Golgi-vesicle protein
Q59WJ7	Q59WJ7_CANAL	605.766	2	NVSsPQELEK	0.002		136	145	27.3	0.00098	38439.7	Potential Golgi-vesicle protein
Q59WJ7	Q59WJ7_CANAL	621.302	3	DESGVVSIQPTsPQLPK	0.023	DESGVVSIQPtSPQLPK	158	174	28.4	0.0028	38439.7	Potential Golgi-vesicle protein
Q59WJ7	Q59WJ7_CANAL	686.291	2	Acetyl-sFKFPSFDFK	0.085	MsFKFPSFDFK	1	11	21.4	0.017	38439.7	Potential Golgi-vesicle protein
Q59WJ9	Q59WJ9_CANAL	827.708	3	AITNLLESQDAHsEAsLHAVSK			1	23	33.9	7e-06	55236.3	Hypothetical protein CSG2
Q59WJ9	Q59WJ9_CANAL	827.714	3	AITNLLEsQDAHSEAsLHAVSK			1	23	32.2	6.2e-05	55236.3	Hypothetical protein CSG2
Q59WK5	Q59WK5_CANAL	806.035	3	qDPSNASTyAVHDEPIAAPELK	0		516	537	37.2	1.1e-07	136392	Hypothetical protein (Fragment)
Q59WK5	Q59WK5_CANAL	496.261	2	VVtSPPRR	0.095	VVtSPPRR	192	199	30.2	2.6e-07	136392	Hypothetical protein (Fragment)
Q59WK5	Q59WK5_CANAL	491.708	2	qsLSDLEK	0.307	qsLSDLEK	495	502	40.2	4.9e-07	136392	Hypothetical protein (Fragment)
Q59WK5	Q59WK5_CANAL	501.223	3	TGYHDGsKNDLSK	0.03	TGYHDGsKNDLSK	747	759	40.3	9.1e-07	136392	Hypothetical protein (Fragment)
Q59WK5	Q59WK5_CANAL	659.615	3	GNIGSSSGSASGSGSsVEQGGK	0.008		67	88	38.9	3.3e-06	136392	Hypothetical protein (Fragment)
Q59WK5	Q59WK5_CANAL	802.359	3	SAYNPGGVsAVFEENTTGPQATK	0.131	SAYNPGGVsAVFEENTTGPQATK	372	394	33.6	5.2e-06	136392	Hypothetical protein (Fragment)
Q59WK5	Q59WK5_CANAL	648.614	3	GSKENDVDDsLIEDAEK	0.124	GSKENDVDDsLIEDAEK	915	931	39	9.2e-06	136392	Hypothetical protein (Fragment)
Q59WK5	Q59WK5_CANAL	663.954	3	SLDPSSTSSSGSsRPENSK	0.021	SLDPSSTSSSGSSRPENsK	686	704	35.8	9.2e-06	136392	Hypothetical protein (Fragment)
Q59WK5	Q59WK5_CANAL	601.607	3	GGDLEtVKNLAYEEGK	0.282	GGDLEtVKNLAYEEGK	317	332	34.5	1e-05	136392	Hypothetical protein (Fragment)
Q59WK5	Q59WK5_CANAL	495.561	3	STTSsVASGLSHDR	0.009		168	181	38.3	1.5e-05	136392	Hypothetical protein (Fragment)
Q59WK5	Q59WK5_CANAL	836.325	2	ENDVDDsLIEDAEK	NA		918	931	40.4	2.7e-05	136392	Hypothetical protein (Fragment)
Q59WK5	Q59WK5_CANAL	597.263	3	DAtFDEKELVASNDR	0.738	DAtFDEKELVASNDR	958	972	35.2	3.4e-05	136392	Hypothetical protein (Fragment)
Q59WK5	Q59WK5_CANAL	555.753	2	qSLsDLEKK	0.009		495	503	34.4	4.3e-05	136392	Hypothetical protein (Fragment)
Q59WK5	Q59WK5_CANAL	495.554	3	STTSSVASGLsHDR	0.003		168	181	34	0.00025	136392	Hypothetical protein (Fragment)
Q59WK5	Q59WK5_CANAL	500.226	2	QSLsDLEK	0.033	QSLsDLEK	495	502	29.3	0.0003	136392	Hypothetical protein (Fragment)
Q59WK5	Q59WK5_CANAL	811.705	3	QDPSNAStYAVHDEPIAAPELK	0		516	537	27.1	0.0004	136392	Hypothetical protein (Fragment)
Q59WK5	Q59WK5_CANAL	682.292	3	GsSKENEVDDSLIEDAEK	0		1257	1274	35.6	0.0008	136392	Hypothetical protein (Fragment)
Q59WK5	Q59WK5_CANAL	486.21	2	SsSTVDAPK	0		1065	1073	29.5	0.00084	136392	Hypothetical protein (Fragment)
Q59WK5	Q59WK5_CANAL	586.733	2	NEIDHSsYK	0.012		456	464	26.8	0.0015	136392	Hypothetical protein (Fragment)
Q59WK5	Q59WK5_CANAL	639.958	3	DAtFDEKELVASNDRK	0.154	DAtFDEKELVASNDRK	1155	1170	29.1	0.0019	136392	Hypothetical protein (Fragment)
Q59WK5	Q59WK5_CANAL	500.223	2	QsLSDLEK	0.112	QsLSDLEK	495	502	26.1	0.0021	136392	Hypothetical protein (Fragment)
Q59WK5	Q59WK5_CANAL	457.72	2	KEtTLSR	0.01		951	957	23.4	0.0045	136392	Hypothetical protein (Fragment)
Q59WK5	Q59WK5_CANAL	759.312	3	SATsTESNYDSGKPYSSSAEK	0.008		1205	1225	24.2	0.0066	136392	Hypothetical protein (Fragment)
Q59WK5	Q59WK5_CANAL	569.743	2	Acetyl-SsDGKFFTK	0.004		1	10	19.6	0.0077	136392	Hypothetical protein (Fragment)
Q59WK5	Q59WK5_CANAL	522.209	3	STTssVASGLSHDR			168	181	23.3	0.011	136392	Hypothetical protein (Fragment)
Q59WK5	Q59WK5_CANAL	522.207	3	STTsSVAsGLSHDR			168	181	20.4	0.015	136392	Hypothetical protein (Fragment)
Q59WK5	Q59WK5_CANAL	558.227	3	EtTLsRDATFDEK			1149	1161	24	0.032	136392	Hypothetical protein (Fragment)
Q59WS4	Q59WS4_CANAL	521.603	3	RGSNsLILPQLER	0		326	338	31.3	0.00073	57763	Potential vacuolar protein sorting kinase Vps15p
Q59WS7	Q59WS7_CANAL	528.241	2	SAATAAATsPK	0.017		36	46	48.9	4e-08	44349.7	Possible proteasome-interacting protein Cic1
Q59WS7	Q59WS7_CANAL	587.932	3	SAATAAAtSPKAsPTAAK			36	53	47.4	4.5e-07	44349.7	Possible proteasome-interacting protein Cic1
Q59WS7	Q59WS7_CANAL	424.212	3	SKSAAtAAATSPK	0.01		34	46	21.3	0.013	44349.7	Possible proteasome-interacting protein Cic1
Q59WS7	Q59WS7_CANAL	394.873	3	VTKPsTASPSK	0.013		59	69	18.9	0.015	44349.7	Possible proteasome-interacting protein Cic1
Q59WS7	Q59WS7_CANAL	394.871	3	VTKPSTAsPSK	0.02		59	69	18.9	0.023	44349.7	Possible proteasome-interacting protein Cic1
Q59WS7	Q59WS7_CANAL	720.823	2	DSsLIPEEITEK	0		104	115	22.8	0.035	44349.7	Possible proteasome-interacting protein Cic1
Q59WT5	Q59WT5_CANAL	687.971	3	SSQSQNsRDNVYTAPATR	0.022	SSQSQNsRDNVYTAPATR	200	217	37.9	1.3e-05	58310.2	Likely plasma membrane t-SNARE
Q59WV8	Q59WV8_CANAL	829.872	2	LPSQTsINEWEFK	0		46	58	36.6	1.3e-06	26418.6	Hypothetical protein
Q59WW0	Q59WW0_CANAL	786.012	3	qEDYsTPNLSEFQLEHDIK	0.008		182	200	36.9	3.5e-07	99915.3	Hypothetical protein
Q59WW0	Q59WW0_CANAL	769.684	3	DPsLVTTGDYTNFEVDTPKK	0.1	DPsLVTTGDYTNFEVDTPKK	376	395	39.1	1.3e-06	99915.3	Hypothetical protein
Q59WW0	Q59WW0_CANAL	791.691	3	QEDYStPNLSEFQLEHDIK	0		182	200	37.9	3.8e-06	99915.3	Hypothetical protein
Q59WW0	Q59WW0_CANAL	651.661	3	LKEVDtEKEIPVEESK	0.483	LKEVDtEKEIPVEESK	527	542	32.4	5.8e-06	99915.3	Hypothetical protein
Q59WW0	Q59WW0_CANAL	637.774	2	LPNSNSsFNSK	0		217	227	35.8	7.1e-06	99915.3	Hypothetical protein
Q59WW0	Q59WW0_CANAL	726.991	3	DPsLVTTGDYTNFEVDTPK	0.041	DPsLVTTGDYTNFEVDTPK	376	394	41.7	1.3e-05	99915.3	Hypothetical protein
Q59WW0	Q59WW0_CANAL	939.393	3	qEDYsTPNLsEFQLEHDIKDHK			182	203	29.2	2.2e-05	99915.3	Hypothetical protein
Q59WW0	Q59WW0_CANAL	786	3	qEDYSTPNLsEFQLEHDIK	0.009		182	200	31.5	6.1e-05	99915.3	Hypothetical protein
Q59WW0	Q59WW0_CANAL	912.727	3	qEDYsTPNLSEFQLEHDIKDHK	0.004		182	203	29.2	6.7e-05	99915.3	Hypothetical protein
Q59WW0	Q59WW0_CANAL	817.717	3	DEEVVSATsSQPTLLSPAQQQR	0		231	252	37.9	7e-05	99915.3	Hypothetical protein
Q59WW0	Q59WW0_CANAL	818.348	3	QEDYStPNLsEFQLEHDIK			182	200	34.1	0.00013	99915.3	Hypothetical protein
Q59WW0	Q59WW0_CANAL	420.86	3	TDAQYtPEKK	0.007		91	100	30.5	0.00016	99915.3	Hypothetical protein
Q59WW0	Q59WW0_CANAL	556.595	3	ELIDHVQsYDLQK	0.012		204	216	32.5	0.00017	99915.3	Hypothetical protein
Q59WW0	Q59WW0_CANAL	812.364	2	EGItTEEEAPLNIK	0.014		619	632	32.9	0.00043	99915.3	Hypothetical protein
Q59WW0	Q59WW0_CANAL	806.856	2	AEQsDSPSLVGSSIR	0.003		10	24	29.2	0.001	99915.3	Hypothetical protein
Q59WW0	Q59WW0_CANAL	510.561	3	DEKNDSsTDALVR	0.019		435	447	28.7	0.0016	99915.3	Hypothetical protein
Q59WW0	Q59WW0_CANAL	694.662	3	SEVEELEKsEEQPLDIK	0.074	SEVEELEKsEEQPLDIK	723	739	29.9	0.004	99915.3	Hypothetical protein
Q59WW0	Q59WW0_CANAL	579.239	2	NDSsTDALVR	0.012		438	447	31.1	0.0041	99915.3	Hypothetical protein
Q59WW0	Q59WW0_CANAL	806.853	2	AEQSDSPSLVGSsIR	0.02		10	24	27.8	0.0077	99915.3	Hypothetical protein
Q59WW0	Q59WW0_CANAL	731.614	3	sADDsTHKNYIHPEKYK			25	41	18.2	0.039	99915.3	Hypothetical protein
Q59WW2	Q59WW2_CANAL	642.807	2	SsLPFPSTIQK	0		74	84	25.8	0.00073	84879.7	Potential GRAM domain protein
Q59WW3	Q59WW3_CANAL	600.952	3	IDQPIAQsPMASGHIR	0.109	IDQPIAQsPMASGHIR	265	280	34.5	3.3e-05	42481.9	Potential intraperoxisomal protein receptor Pex7
Q59WW3	Q59WW3_CANAL	558.252	2	STVIAsGGTDK	0.021	STVIAsGGTDK	242	252	18.8	0.046	42481.9	Potential intraperoxisomal protein receptor Pex7
Q59WW5	Q59WW5_CANAL	465.746	2	TVRsLFK	0.003		207	213	16.9	0.024	44849	Likely mitochondrial ketol-acid reductoisomerase
Q59WW5	Q59WW5_CANAL	752.334	2	sFRTTsMRMAR			1	12	21.3	0.028	44849	Likely mitochondrial ketol-acid reductoisomerase
Q59X11	ATG2_CANAL	645.315	3	RNsNASDELPVEVAKPK	0.017		1634	1650	32.1	8.1e-05	207368	Autophagy-related protein 2
Q59X11	ATG2_CANAL	578.268	2	SRsAQRNEK	0.014		397	405	21.6	0.0034	207368	Autophagy-related protein 2
Q59X21	Q59X21_CANAL	461.971	4	RDsVSQNESHHLLSR	0.035	RDsVSQNESHHLLSR	474	488	33.2	0.00013	119782	Hypothetical protein
Q59X21	Q59X21_CANAL	744.04	3	NNsAPITSTPAASQQAIPIIR	0.042	NNsAPITSTPAASQQAIPIIR	1009	1029	28.8	0.00021	119782	Hypothetical protein
Q59X23	Q59X23_CANAL	717.295	2	sPTTSNIEFDDK	0.009		17	28	44.5	3.9e-08	86668.7	Hypothetical protein PMT4
Q59X23	Q59X23_CANAL	521.234	3	sPTTSNIEFDDKK	0.013		17	29	26.6	0.0008	86668.7	Hypothetical protein PMT4
Q59X23	Q59X23_CANAL	563.934	3	KsPTTSNIEFDDKK	0.033	KsPTTSNIEFDDKK	16	29	25.7	0.0027	86668.7	Hypothetical protein PMT4
Q59X31	Q59X31_CANAL	775.005	3	KSsAACVAFPTCGLAMAESER	0.002		728	748	40.4	2.7e-07	97474.3	Hypothetical protein ECM17
Q59X42	Q59X42_CANAL	557.592	3	IVELDANEESsEKK	0		169	182	29	0.0024	47283.1	Hypothetical protein
Q59X47	Q59X47_CANAL	792.386	2	StIILTDEIDLDR	0		46	58	43.9	2.6e-09	46722.7	Hypothetical protein
Q59X47	Q59X47_CANAL	722.659	3	DVsMVDVSKAEGENQQPPR	0.242	DVsMVDVSKAEGENQQPPR	25	43	48.5	3.4e-07	46722.7	Hypothetical protein
Q59X47	Q59X47_CANAL	530.228	2	DVsMVDVSK	0.199	DVsMVDVSK	25	33	43.9	7.7e-07	46722.7	Hypothetical protein
Q59X47	Q59X47_CANAL	623.322	3	RKsTIILTDEIDLDR	0.003		44	58	40.1	4.5e-06	46722.7	Hypothetical protein
Q59X47	Q59X47_CANAL	538.222	2	DVsmVDVSK	0.18	DVsmVDVSK	25	33	44.8	5e-06	46722.7	Hypothetical protein
Q59X47	Q59X47_CANAL	689.645	3	StNQEAPATAPLDDINTTK	0.008		6	24	38.9	2.5e-05	46722.7	Hypothetical protein
Q59X47	Q59X47_CANAL	649.975	3	RKstIILTDEIDLDR			44	58	34.9	0.00093	46722.7	Hypothetical protein
Q59X47	Q59X47_CANAL	623.329	3	RKSTIILtDEIDLDR	0.002		44	58	31	0.0025	46722.7	Hypothetical protein
Q59X49	Q59X49_CANAL	659.914	3	SNDSYGSSNTDsYGSSNR	0.016		56	73	44.6	5.3e-08	22615	Potential stress response protein
Q59X49	Q59X49_CANAL	533.7	2	TDsYGSSNR	0.03	TDsYGSSNR	92	100	40.9	1.1e-07	22615	Potential stress response protein
Q59X49	Q59X49_CANAL	678.261	3	RDNDsYGSSNNDSYGSSK	0.005		74	91	41.1	2.9e-07	22615	Potential stress response protein
Q59X49	Q59X49_CANAL	706.602	3	GNDSYGSSNDDsYGSSNRR	0.004		183	201	39.5	1.2e-06	22615	Potential stress response protein
Q59X49	Q59X49_CANAL	678.26	3	RDNDSYGSsNNDSYGSSK	0.004		74	91	33	3.5e-06	22615	Potential stress response protein
Q59X49	Q59X49_CANAL	659.919	3	SNDsYGSSNTDSYGSSNR	0		56	73	35.6	5.1e-05	22615	Potential stress response protein
Q59X49	Q59X49_CANAL	683.259	3	sGNDSYGSSNNDSYGSSNR	0		101	119	28.8	0.00039	22615	Potential stress response protein
Q59X49	Q59X49_CANAL	706.605	3	RGNDSYGSsNDDSYGSSNR	0		182	200	28.9	0.00065	22615	Potential stress response protein
Q59X49	Q59X49_CANAL	711.936	3	SNDSYGSSNTDsYGSSNRR	0		56	74	33.3	0.00096	22615	Potential stress response protein
Q59X49	Q59X49_CANAL	694.264	2	RGNSDsYGSSDY	0.002		201	212	32.5	0.0014	22615	Potential stress response protein
Q59X49	Q59X49_CANAL	711.938	3	RSNDSYGSsNTDSYGSSNR	0		55	73	23.7	0.003	22615	Potential stress response protein
Q59X49	Q59X49_CANAL	725.949	3	SGNDSYGSsNNDSYGSSNRK	0.005		101	120	24.3	0.022	22615	Potential stress response protein
Q59X54	Q59X54_CANAL	550.941	3	KDsNLPIEIDVLSK	0.635	KDsNLPIEIDVLSK	416	429	37.9	1.7e-05	61863.5	Hypothetical protein SUR1
Q59X55	Q59X55_CANAL	543.769	2	APHALPVSsK	0.004		1	11	29.4	2.7e-05	121968	Potential assimilatory sulfite reductase subunit
Q59X55	Q59X55_CANAL	934.414	2	TTsEVDVTSSSSFSLIK	0.009		12	28	29.3	0.0021	121968	Potential assimilatory sulfite reductase subunit
Q59X63	Q59X63_CANAL	378.188	2	LItGGSK	0.009		61	67	22.2	0.0036	93962.9	Potential acyltransferase
Q59X85	Q59X85_CANAL	664.349	3	IVNPQNYKPPKPSVSsR	0		625	641	35.7	2.6e-06	86357.9	Hypothetical protein SWA2
Q59X85	Q59X85_CANAL	780.684	3	DAFADLFQSASSGNsTSSLNLK	0		7	28	39.3	3e-05	86357.9	Hypothetical protein SWA2
Q59X85	Q59X85_CANAL	498.72	2	NAPAPGsFR	NA		468	476	26.8	0.001	86357.9	Hypothetical protein SWA2
Q59X85	Q59X85_CANAL	593.271	3	ESsPELPQRPSNSNR	0.003		374	388	25.2	0.0019	86357.9	Hypothetical protein SWA2
Q59X85	Q59X85_CANAL	643.289	2	KANsFYNFSK	0.03	KANsFYNFSK	273	282	23	0.036	86357.9	Hypothetical protein SWA2
Q59X99	Q59X99_CANAL	734.306	3	VEGLLEIsDDDDNDNDKSK	0.026	VEGLLEIsDDDDNDNDKSK	130	148	31.9	1.5e-05	45341.2	Hypothetical protein
Q59X99	Q59X99_CANAL	711.322	2	TTTKKSIsstK			353	363	21.4	0.017	45341.2	Hypothetical protein
Q59X99	Q59X99_CANAL	469.217	2	sGKTRtK			389	395	18.4	0.021	45341.2	Hypothetical protein
Q59X99	Q59X99_CANAL	659.662	3	KsLDPFDLIDINHIEK	NA		95	110	21.4	0.022	45341.2	Hypothetical protein
Q59XA1	Q59XA1_CANAL	773.361	2	GVFSsLETLQQEK	0.014		283	295	42.7	7.7e-06	69431.7	Hypothetical protein
Q59XA2	Q59XA2_CANAL	491.576	3	RGsYQQINLSAR	0		200	211	30.8	0.0081	74102.4	Hypothetical protein
Q59XB2	Q59XB2_CANAL	629.279	2	IPFtPFQGDR	NA		293	302	34.3	0.00014	44186.3	Hypothetical protein TFB3
Q59XB2	Q59XB2_CANAL	576.612	3	IPFtPFQGDRDLNK	NA		293	306	20.2	0.025	44186.3	Hypothetical protein TFB3
Q59XC8	Q59XC8_CANAL	713.32	2	qSsTGVLWVTER	0.002		144	155	36.3	2.3e-07	63483.4	Potential aspartate aminotransferase
Q59XC8	Q59XC8_CANAL	504.743	2	TPsATPNLK	0.035	TPsATPNLK	92	100	30.7	2.2e-06	63483.4	Potential aspartate aminotransferase
Q59XC8	Q59XC8_CANAL	558.789	2	qHLISKLsK	0.011		106	114	30.4	9.1e-06	63483.4	Potential aspartate aminotransferase
Q59XC8	Q59XC8_CANAL	721.82	2	QsSTGVLWVTER	0.006		144	155	26.6	0.0087	63483.4	Potential aspartate aminotransferase
Q59XC8	Q59XC8_CANAL	888.343	3	Acetyl-SSFQLTDEsDNDQDsVLEFER			1	22	24.1	0.018	63483.4	Potential aspartate aminotransferase
Q59XC8	Q59XC8_CANAL	902.725	3	ENYHASTYQTIPGRTPsAtPNLK			78	100	27.4	0.029	63483.4	Potential aspartate aminotransferase
Q59XE4	Q59XE4_CANAL	796.356	2	Acetyl-sLSGMEEFETVLK	0.015		1	14	38.9	5.2e-08	75455.4	Hypothetical protein NRD1
Q59XE4	Q59XE4_CANAL	564.721	2	STtPPGsPPK			157	166	31	3.4e-06	75455.4	Hypothetical protein NRD1
Q59XE4	Q59XE4_CANAL	688.997	3	sPPSSSVQALQQNMQNLR	0.002		356	373	38.4	2.1e-05	75455.4	Hypothetical protein NRD1
Q59XE4	Q59XE4_CANAL	694.322	3	sPPSSSVQALQQNmQNLR	0.008		356	373	35.4	3.6e-05	75455.4	Hypothetical protein NRD1
Q59XE4	Q59XE4_CANAL	564.718	2	sTtPPGSPPK			157	166	19.7	0.0053	75455.4	Hypothetical protein NRD1
Q59XE4	Q59XE4_CANAL	564.723	2	stTPPGSPPK			157	166	17.7	0.028	75455.4	Hypothetical protein NRD1
Q59XG4	Q59XG4_CANAL	522.745	2	LAsQTTSTR	0.107	LAsQTTSTR	367	375	43.2	1.4e-09	54461.4	Hypothetical protein
Q59XG4	Q59XG4_CANAL	954.388	2	Acetyl-sSESLPISSSSSSSSSNR	0		1	19	54.8	1e-08	54461.4	Hypothetical protein
Q59XG4	Q59XG4_CANAL	562.723	2	LAsQTTsTR			367	375	31.8	1.3e-05	54461.4	Hypothetical protein
Q59XG4	Q59XG4_CANAL	663.257	3	Acetyl-sSEsLPISSSSSSSSSNR			1	19	29.5	0.00014	54461.4	Hypothetical protein
Q59XM1	EXO84_CANAL	656.311	3	sFSQTGPIDMANLPALPK	0.017		162	179	40.6	3.1e-07	94005.5	Exocyst complex component EXO84
Q59XM1	EXO84_CANAL	656.322	3	SFsQTGPIDMANLPALPK	0.004		162	179	37.2	5.7e-07	94005.5	Exocyst complex component EXO84
Q59XM1	EXO84_CANAL	628.623	3	LLDSRLSsPSNNNGDSK	0		480	496	33.8	4.9e-06	94005.5	Exocyst complex component EXO84
Q59XP0	Q59XP0_CANAL	840.856	2	GSsPSPYASTTSTTTR	0.011		122	137	42.5	3.9e-06	58773.6	Likely plasma membrane t-SNARE
Q59XP0	Q59XP0_CANAL	608.271	2	DNVYTVPAtR	0.126	DNVYTVPAtR	212	221	35.8	2.7e-05	58773.6	Likely plasma membrane t-SNARE
Q59XS3	Q59XS3_CANAL	554.911	3	GPIIEEHtDSESIR	0.019		133	146	53.9	1.8e-10	35872.9	Hypothetical protein
Q59XS3	Q59XS3_CANAL	580.274	2	VSSIFSNtPK	0.022	VSSIFsNTPK	123	132	50.8	2.4e-07	35872.9	Hypothetical protein
Q59XS3	Q59XS3_CANAL	581.575	3	GPIIEEHtDSEsIR			133	146	30.1	0.00011	35872.9	Hypothetical protein
Q59XS3	Q59XS3_CANAL	657.994	3	LIVDDEKVSSIFSNtPK	0.001		116	132	31.1	0.00025	35872.9	Hypothetical protein
Q59XS3	Q59XS3_CANAL	580.278	2	VsSIFSNTPK	0.005		123	132	20.9	0.016	35872.9	Hypothetical protein
Q59XT1	Q59XT1_CANAL	685.28	3	ANsSSAYNDEDDKITTSR	0.006		140	157	34.3	8.3e-06	36873.2	Hypothetical protein
Q59XT2	Q59XT2_CANAL	811.889	2	sIDAFPNPNINNAR	NA		234	247	24	0.0039	49870	Hypothetical protein RAP1
Q59XU1	Q59XU1_CANAL	590.745	2	ITsSDsLLGK			175	184	37.1	1e-05	30854.9	Hypothetical protein
Q59XU1	Q59XU1_CANAL	550.764	2	ITSSDsLLGK	0.005		175	184	32.4	0.00057	30854.9	Hypothetical protein
Q59XU3	Q59XU3_CANAL	713.665	3	Acetyl-ASITsNPQILINNDSSTNK	0.002		1	20	27	8.4e-05	30759.5	Hypothetical protein
Q59XU7	Q59XU7_CANAL	724.682	3	IKsNSSVTNGGNVGATLTESR	0.001		32	52	29.3	6.9e-05	51775.9	Hypothetical protein PHO23
Q59XV1	Q59XV1_CANAL	693.798	2	GtDVSNSGATNVGK	0.25	GtDVSNSGATNVGK	422	435	43	7.8e-09	53775.6	Likely protein kinase
Q59XV1	Q59XV1_CANAL	666.645	3	SDTASSAFVQLVHAAtANK	0.047	SDTASSAFVQLVHAAtANK	436	454	50.7	2.8e-08	53775.6	Likely protein kinase
Q59XV1	Q59XV1_CANAL	517.75	2	SKAsLSSFK	0.015		403	411	39	1.3e-07	53775.6	Likely protein kinase
Q59XV1	Q59XV1_CANAL	744.33	2	FNDVINSLDtNR	0.035	FNDVINSLDtNR	391	402	49.1	1.6e-07	53775.6	Likely protein kinase
Q59XV1	Q59XV1_CANAL	556.241	2	GESPLNtWK	0.099	GESPLNtWK	381	389	36.4	2.5e-06	53775.6	Likely protein kinase
Q59XV1	Q59XV1_CANAL	557.736	2	sKASLsSFK			403	411	31	7.8e-06	53775.6	Likely protein kinase
Q59XV1	Q59XV1_CANAL	410.187	2	AsLSSFK	0.07	AsLSSFK	405	411	25	1.8e-05	53775.6	Likely protein kinase
Q59XV1	Q59XV1_CANAL	556.239	2	GEsPLNTWK	0.243	GEsPLNTWK	381	389	30.3	2.3e-05	53775.6	Likely protein kinase
Q59XV1	Q59XV1_CANAL	492.551	3	RGEsPLNtWKK			380	390	28.4	3.7e-05	53775.6	Likely protein kinase
Q59XV1	Q59XV1_CANAL	568.275	3	FNDVINSLDtNRSK	0.025	FNDVINSLDTNRsK	391	404	35.3	4.3e-05	53775.6	Likely protein kinase
Q59XV1	Q59XV1_CANAL	410.185	2	ASLsSFK	0.015		405	411	29.1	0.00014	53775.6	Likely protein kinase
Q59XV1	Q59XV1_CANAL	632.541	4	SPYDLAHSNRGtDVSNSGATNVGK	0.021	SPYDLAHSNRGtDVSNSGATNVGK	412	435	30.1	0.00026	53775.6	Likely protein kinase
Q59XV1	Q59XV1_CANAL	465.897	3	RGESPLNtWKK	0.273	RGESPLNtWKK	380	390	25	0.0027	53775.6	Likely protein kinase
Q59XV1	Q59XV1_CANAL	423.203	3	RGEsPLNTWK	0.246	RGEsPLNTWK	380	389	23.6	0.0066	53775.6	Likely protein kinase
Q59XV1	Q59XV1_CANAL	626.96	3	ANPsTNDGLTIPGTTSPR	0.001		362	379	22.6	0.015	53775.6	Likely protein kinase
Q59XV1	Q59XV1_CANAL	653.976	3	ASLSsFKSPYDLAHSNR	0.002		405	421	22.6	0.02	53775.6	Likely protein kinase
[truncated: 3,544 more rows]

## Sheet: S.pombe
## Experimentally determined phosphorylation sites for S. pombe
## The corresponding mass spectra can be found on our website at http://interactome-cmp.ucsf.edu/evolution_phosphoregulation.html
## Acc: Uniprot accession ; Gene: Uniprot entry name; m - mass; z-charge;
## Peptide (Prospector annotation) - most likely peptide annotation as provided by Prospector. Phosphorylated residues are indicated my lower case (s/t/y).
## Phosphosite confidence score - The Inspect package was used to calculate the BY ion intensity difference between the best and second best phosphosite placement for phosphopeptides with one phosphosite. Higher values correspond to higher confidence in phosphosite assignment.
## Phosphosite confidence score - A cut-off of 0.02 was selected based on a list of manually curated phosphopeptides and results in approximately 85% accuracy and 75% coverage of confident site assignment. Sites with only one possible phosphosite placement have a score of "NA". Peptides with more than one phosphorylation site were not evaluated and have no score associated
## Peptide (Inspect annotation) - Sites scoring above the threshold were defined as confident assignment and are indicated here. Phosphorylated residues are indicated my lower case (s/t/y).
## Start/End - peptide start/end position in protein
## Score - peptide score; Expect - and expectation value for the peptide match
Acc #	Gene	m/z	z	Peptide (Prospector annotation)	Phosphosite confidence score	Peptide (Inspect annotation)	Start	End	Score	Expect	Protein MW	Protein Name
A1EGU0	A1EGU0_SCHPO	778.651	3	VDTHVTSTGGESDPPSSEHEsV	0.006		417	438	31.6	0.00028	49304.8	Malic acid transport protein
A1EGU1	A1EGU1_SCHPO	750.394	2	ALIATGsPLPPLNR	0.026	ALIATGsPLPPLNR	439	452	52.1	3.8e-09	62535.4	Malic enzyme
A1EGU1	A1EGU1_SCHPO	518.763	2	GVTLLNsPR	0.197	GVTLLNsPR	15	23	35.4	2.4e-06	62535.4	Malic enzyme
A4CYJ4	A4CYJ4_SCHPO	628.308	2	TGNLGsSVVVSR	0.019		44	55	47.8	2.3e-07	13320.5	Ribosomal protein L22
A4CYJ4	A4CYJ4_SCHPO	628.301	2	TGNLGSSVVVsR	0.006		44	55	28.4	0.00052	13320.5	Ribosomal protein L22
O13351	PMT3_SCHPO	700.778	2	SEsPSANISDADK	0.018		1	14	46	1.1e-08	12934.7	Ubiquitin-like protein pmt3/smt3 precursor
O13351	PMT3_SCHPO	761.768	2	Acetyl-sEsPSANISDADK			1	14	41.3	6.1e-07	12934.7	Ubiquitin-like protein pmt3/smt3 precursor
O13351	PMT3_SCHPO	740.763	2	sESPsANISDADK			1	14	33.5	0.0001	12934.7	Ubiquitin-like protein pmt3/smt3 precursor
O13370	DED1_SCHPO	798.83	2	SQtPSEFSSNYGGR	0.052	SQtPSEFSSNYGGR	61	74	50.1	1.5e-10	69759.3	ATP-dependent RNA helicase ded1
O13370	DED1_SCHPO	665.954	3	DKPSAGAAPAVGDDESVSsR	0.004		37	56	64.8	3.1e-09	69759.3	ATP-dependent RNA helicase ded1
O13370	DED1_SCHPO	971.43	2	Acetyl-sDNVQQQVDSVGSVTEK	0.107	MsDNVQQQVDSVGSVTEK	1	18	46.7	9.4e-08	69759.3	ATP-dependent RNA helicase ded1
O13614	RS10B_SCHPO	722.8	2	DDGAAPGGFAPsFR	NA		125	138	44.7	4.1e-05	16442.9	40S ribosomal protein S10-B
O13614	RS10B_SCHPO	524.897	3	KDDGAAPGGFAPsFR	NA		124	138	29.8	0.00071	16442.9	40S ribosomal protein S10-B
O13635	O13635_SCHPO	763.319	3	NDCISsSSNPDISDVDDLVR	0.006		160	179	36.6	1.2e-05	33211.7	HYPOTHETICAL 32.8KD PROTEIN IN NCE3-HHT2 INTERGENIC REGION
O13635	O13635_SCHPO	806.007	3	KNDCISSSsNPDISDVDDLVR	0.004		159	179	35.4	0.00013	33211.7	HYPOTHETICAL 32.8KD PROTEIN IN NCE3-HHT2 INTERGENIC REGION
O13637	SEC31_SCHPO	829.361	2	SPFPGASSAQPAAmsR			885	900	52.1	4e-10	132500	Protein transport protein sec31
O13637	SEC31_SCHPO	821.365	2	SPFPGASSAQPAAMsR	0.06	SPFPGASSAQPAAMsR	885	900	57.9	2.6e-09	132500	Protein transport protein sec31
O13637	SEC31_SCHPO	958.165	3	VPPVQQPSHPNPYTPVAPQsPVAAASR	0.09	VPPVQQPSHPNPYTPVAPQsPVAAASR	945	971	49.5	4.3e-09	132500	Protein transport protein sec31
O13637	SEC31_SCHPO	734.847	2	LAEsVQEVSIADK	0.185	LAEsVQEVSIADK	522	534	43	1.2e-07	132500	Protein transport protein sec31
O13637	SEC31_SCHPO	738.884	4	VPPVQQPsHPNPYTPVAPQsPVAAASR			945	971	45.5	2.1e-07	132500	Protein transport protein sec31
O13637	SEC31_SCHPO	532.939	3	LAEsVQEVSIADKK	0.086	LAEsVQEVSIADKK	522	535	35.8	1.6e-06	132500	Protein transport protein sec31
O13637	SEC31_SCHPO	966.855	2	NANNENYDDDSsFYGK	0.007		506	521	30.7	1.6e-05	132500	Protein transport protein sec31
O13637	SEC31_SCHPO	529.752	2	IVSFsPNSK	0.01		395	403	22.2	0.01	132500	Protein transport protein sec31
O13648	O13648_SCHPO	739.333	3	DKMNELTSQTTDQLSVtPK	0.031	DKMNELTSQTTDQLSVtPK	194	212	32.7	8.3e-06	61761.4	Type I ribosomal protein arginine N-methytransferase Rmt3
O13648	O13648_SCHPO	658.303	3	MNELTSQTTDQLSVtPK	0.023	MNELTSQTTDQLSVtPK	196	212	29.5	0.0052	61761.4	Type I ribosomal protein arginine N-methytransferase Rmt3
O13658	YBCB_SCHPO	933.459	2	SLNVSNNTtPPLSTVNK	0.001		253	269	35.8	1.4e-05	81929.8	Uncharacterized transcriptional regulatory protein C27B12.11c
O13665	O13665_SCHPO	751.338	3	IQDNAVVDSPtEELSEQAAR	0.014		492	511	46.4	2.5e-07	95093.9	Pi074 protein
O13672	RL8_SCHPO	635.3	2	sFGIGQDIQPK	NA		33	43	44.2	3.8e-06	28606.9	60S ribosomal protein L8
O13686	YDY5_SCHPO	704.327	3	ELQGDDSSRKsPPSDSVVK	0.004		3	21	31.9	0.0049	149064	Uncharacterized RWD, RING finger and WD repeat-containing protein C11E3.05
O13686	YDY5_SCHPO	490.543	3	NSsPIDYEHSLK	0.003		22	33	21	0.033	149064	Uncharacterized RWD, RING finger and WD repeat-containing protein C11E3.05
O13687	VATE_SCHPO	812.342	2	Acetyl-sLSDEQVQAEMHK	0.007		1	14	39.2	2.1e-05	25741.9	Vacuolar ATP synthase subunit E
O13703	O13703_SCHPO	489.556	3	SSSHIQSLsPESK	0.025	SSSHIQsLSPESK	158	170	32.5	0.00017	29623	Endosomal sorting protein
O13710	SMC5_SCHPO	628.878	5	sDLKLKDDTFNDYSSASmELNTsNLR			275	300	32	0.023	122991	Structural maintenance of chromosomes protein 5
O13714	YDZ7_SCHPO	867.076	3	Acetyl-SsHDDDHTPLLISDPSVNKPFR	0.001		1	23	45	1.1e-06	71756.1	Uncharacterized membrane protein C14C4.07
O13726	O13726_SCHPO	484.889	3	KVSsTFEQYQR	0		515	525	25.7	0.0041	63911.7	Sodium/hydrogen exchanger
O13727	YDO7_SCHPO	889.387	2	FGVENSsSAEFGEPLK	0.018		161	176	38.9	7.8e-06	21455.5	Uncharacterized protein C15A10.07
O13733	PPK3_SCHPO	622.923	3	FIHsSSAsPSPSIDmK			553	568	29.9	4e-05	71633.3	Protein kinase domain-containing protein ppk3
O13734	SGO2_SCHPO	648.284	2	NHEYEIVsPK	0.036	NHEYEIVsPK	233	242	36.4	5.6e-06	72485.9	Shugoshin-2
O13734	SGO2_SCHPO	626.788	2	ASLsPNVEDLK	0.019		4	14	23.3	0.0018	72485.9	Shugoshin-2
O13734	SGO2_SCHPO	531.754	2	IsKAQsIR			27	34	19.3	0.0098	72485.9	Shugoshin-2
O13735	FAT1_SCHPO	566.31	2	sPLATPKPLK	0.165	sPLATPKPLK	1290	1299	49.9	2.8e-10	154327	Actin-interacting protein 3 homolog
O13735	FAT1_SCHPO	895.37	2	AESSEDTSEIEsLQGK	0.034	AESSEDTSEIEsLQGK	509	524	37.7	5.4e-07	154327	Actin-interacting protein 3 homolog
O13735	FAT1_SCHPO	544.267	2	KsPSSFVQK	0.133	KsPSSFVQK	358	366	43	7.3e-07	154327	Actin-interacting protein 3 homolog
O13735	FAT1_SCHPO	596.753	2	GSsQGSISSFR	0.006		203	213	33.3	1.9e-06	154327	Actin-interacting protein 3 homolog
O13735	FAT1_SCHPO	480.218	2	sPSSFVQK	0.058	sPSSFVQK	359	366	36.2	3.6e-06	154327	Actin-interacting protein 3 homolog
O13735	FAT1_SCHPO	895.381	2	AEsSEDTSEIESLQGK	0.013		509	524	37	7.1e-06	154327	Actin-interacting protein 3 homolog
O13735	FAT1_SCHPO	936.906	2	GGLANFENDsLEELER	NA		593	608	41	1.6e-05	154327	Actin-interacting protein 3 homolog
O13735	FAT1_SCHPO	875.876	2	VESSsDTVFENTDLK	0		1332	1346	36.5	1.6e-05	154327	Actin-interacting protein 3 homolog
O13735	FAT1_SCHPO	624.592	3	LEDIADEVETDATsQR	0.021	LEDIADEVETDATsQR	484	499	22.5	0.035	154327	Actin-interacting protein 3 homolog
O13736	YDR1_SCHPO	551.283	2	APsPPATRPK	0.342	APsPPATRPK	917	926	37.4	2.3e-08	154634	SH3 domain-containing protein C16E8.01
O13736	YDR1_SCHPO	740.355	2	AVsPEIPPTYTPK	0.269	AVsPEIPPTYTPK	218	230	46.7	1e-07	154634	SH3 domain-containing protein C16E8.01
O13736	YDR1_SCHPO	538.25	2	LPsDSALHR	0.046	LPsDSALHR	459	467	37.1	3.2e-07	154634	SH3 domain-containing protein C16E8.01
O13736	YDR1_SCHPO	619.779	2	EIAAASGsPMPK	0.009		447	458	40.8	4.2e-07	154634	SH3 domain-containing protein C16E8.01
O13736	YDR1_SCHPO	548.76	2	ASsVTVEPAR	0.017		950	959	37.1	3.5e-05	154634	SH3 domain-containing protein C16E8.01
O13736	YDR1_SCHPO	659.804	2	tAPIPEPEEQK	NA		984	994	29.5	0.00018	154634	SH3 domain-containing protein C16E8.01
O13736	YDR1_SCHPO	893.76	3	sTTPQKFDDDAWANKPVTEPPVR	0.002		927	949	29.7	0.00063	154634	SH3 domain-containing protein C16E8.01
O13736	YDR1_SCHPO	780.346	2	AVsPEIPPtYTPK			218	230	27.5	0.0045	154634	SH3 domain-containing protein C16E8.01
O13736	YDR1_SCHPO	740.357	2	AVSPEIPPtYTPK	0.201	AVsPEIPPTYTPK	218	230	22.5	0.0049	154634	SH3 domain-containing protein C16E8.01
O13736	YDR1_SCHPO	952.395	2	APSPPATRPKsttPQK			917	932	26.1	0.021	154634	SH3 domain-containing protein C16E8.01
O13736	YDR1_SCHPO	664.069	4	EGVVPSNFIKPDTEGDAKsPPSSSK	0.048	EGVVPSNFIKPDTEGDAKsPPSSSK	555	579	22.2	0.028	154634	SH3 domain-containing protein C16E8.01
O13759	CSX1_SCHPO	699.658	3	MSASNSDVNAPIsPVVDEGK	0.223	MSASNSDVNAPIsPVVDEGK	30	49	56.7	2.4e-08	67871	RNA-binding post-transcriptional regulator csx1
O13759	CSX1_SCHPO	605.795	2	SELVsPTLER			50	59	54.8	1.1e-06	67871	RNA-binding post-transcriptional regulator csx1
O13759	CSX1_SCHPO	497.719	2	qsSLIDLR	0.001		577	584	24.8	0.00071	67871	RNA-binding post-transcriptional regulator csx1
O13759	CSX1_SCHPO	704.984	3	mSASNSDVNAPIsPVVDEGK	0.137	mSASNSDVNAPIsPVVDEGK	30	49	25.8	0.0011	67871	RNA-binding post-transcriptional regulator csx1
O13769	ULP2_SCHPO	760.682	3	HSLPsSPTPFNSNSGDSLLSR	0		274	294	48.8	2.2e-06	73761.2	Ubiquitin-like-specific protease 2
O13769	ULP2_SCHPO	421.543	3	NVHLKStDIR	0.01		534	543	21.7	0.0037	73761.2	Ubiquitin-like-specific protease 2
O13769	ULP2_SCHPO	735.334	2	RSFQNVtVVSPR	0.06	RSFQNVtVVSPR	95	106	24.3	0.021	73761.2	Ubiquitin-like-specific protease 2
O13774	GCH1_SCHPO	529.735	2	DYIDsPLR			7	14	33.1	2.9e-05	26492.9	GTP cyclohydrolase I
O13776	YE9G_SCHPO	533.898	3	EIGsIEETFTHEK	0.009		202	214	29	1.4e-05	104837	Uncharacterized protein C17A5.16
O13776	YE9G_SCHPO	527.598	3	GKIPENVsSSELIK	0.015		739	752	33.5	0.00015	104837	Uncharacterized protein C17A5.16
O13776	YE9G_SCHPO	533.898	3	EIGSIEEtFTHEK	0.009		202	214	22.2	0.0087	104837	Uncharacterized protein C17A5.16
O13777	YIU1_SCHPO	599.777	2	FDSPEsPVLK	0.12	FDSPEsPVLK	203	212	40.8	1.7e-07	24947	Uncharacterized protein C1610.01
O13779	YF2E_SCHPO	798.071	3	KLsRDELYLPISPNNAQEPK	0.01		188	207	51.7	1.4e-07	71198.6	Putative metal ion transporter C17A12.14
O13779	YF2E_SCHPO	954.433	2	DELYLPIsPNNAQEPK	0.141	DELYLPIsPNNAQEPK	192	207	47.3	2.3e-07	71198.6	Putative metal ion transporter C17A12.14
O13779	YF2E_SCHPO	708.798	4	HYESDEDIENIsLPESHPEDIQR	0.024	HYESDEDIENIsLPESHPEDIQR	102	124	49.1	8.6e-07	71198.6	Putative metal ion transporter C17A12.14
O13779	YF2E_SCHPO	708.797	4	HYEsDEDIENISLPESHPEDIQR	0.015		102	124	37.9	4.1e-06	71198.6	Putative metal ion transporter C17A12.14
O13779	YF2E_SCHPO	435.906	3	KLsEPLLVNGR	NA		239	249	27.7	0.00089	71198.6	Putative metal ion transporter C17A12.14
O13787	SEC62_SCHPO	688.788	2	HRNPTVEEVsE	0.148	HRNPTVEEVsE	263	273	32.2	0.00026	31585.8	Translocation protein sec62
O13788	O13788_SCHPO	760.672	3	SLEDSDSLsELYLTNEEKK	0.01		414	432	44.7	6.4e-07	59639.4	SWI/SNF and RSC complex subunit Ssr1
O13788	O13788_SCHPO	862.062	3	DTAANGLPVQSSAETSVIPASSMsPS	0.013		502	527	45	3.1e-06	59639.4	SWI/SNF and RSC complex subunit Ssr1
O13788	O13788_SCHPO	867.385	3	DTAANGLPVQSSAETSVIPASSmsPS			502	527	35.3	2.2e-05	59639.4	SWI/SNF and RSC complex subunit Ssr1
O13788	O13788_SCHPO	660.288	2	FPsPTTIADYK	0.028	FPsPTTIADYK	269	279	28.8	3.3e-05	59639.4	SWI/SNF and RSC complex subunit Ssr1
O13789	O13789_SCHPO	892.358	2	DTSTSsFTNPTDSSTR	0.005		29	44	44.5	2.8e-06	70009	Glucosidase
O13789	O13789_SCHPO	512.577	3	FSIRPsSQTYNR	0		76	87	23.2	0.0035	70009	Glucosidase
O13791	SLT1_SCHPO	828.327	2	TSsQAsVSDEELSR			222	235	51.2	8.9e-10	49137	Protein slt1
O13791	SLT1_SCHPO	698.284	2	EsPSTSFAQmSK	0.069	EsPSTSFAQmSK	268	279	45	3.1e-09	49137	Protein slt1
O13791	SLT1_SCHPO	740.655	3	qPSPPVAEHFSNETFSAsPK	0.01		357	376	43.8	3.8e-09	49137	Protein slt1
O13791	SLT1_SCHPO	788.327	2	TSsQASVSDEELSR	0.01		222	235	50.6	2.7e-08	49137	Protein slt1
O13791	SLT1_SCHPO	740.648	3	qPsPPVAEHFSNETFSASPK	0.182	qPsPPVAEHFSNETFSASPK	357	376	46.4	5e-08	49137	Protein slt1
O13791	SLT1_SCHPO	788.337	2	TSSQASVsDEELSR			222	235	53	4.3e-07	49137	Protein slt1
O13791	SLT1_SCHPO	614.25	3	SEGsNNHEQGSFNEPK	0.047	SEGsNNHEQGSFNEPK	384	399	42	7.1e-07	49137	Protein slt1
O13791	SLT1_SCHPO	690.272	2	EsPSTSFAQMSK	0.062	EsPSTSFAQMSK	268	279	40.2	1.5e-06	49137	Protein slt1
O13791	SLT1_SCHPO	698.282	2	ESPsTSFAQmSK	0.063	EsPSTSFAQmSK	268	279	35	1.7e-06	49137	Protein slt1
O13791	SLT1_SCHPO	541.261	2	RPSsQASLR	0.001		412	420	29.7	1.8e-06	49137	Protein slt1
O13791	SLT1_SCHPO	767.316	3	qPsPPVAEHFSNETFSAsPK			357	376	36.2	1.8e-06	49137	Protein slt1
O13791	SLT1_SCHPO	761.697	3	SNVDSNDSAsPKRPSSQASLR	0		400	420	42.4	3.2e-06	49137	Protein slt1
O13791	SLT1_SCHPO	746.341	3	QPSPPVAEHFSNETFSAsPK	0.003		357	376	28	5.9e-06	49137	Protein slt1
O13791	SLT1_SCHPO	583.275	4	KHIDLTARESPsTSFAQmSK	0		260	279	34.2	1.4e-05	49137	Protein slt1
O13791	SLT1_SCHPO	847.698	3	GAETDVKsEGSNNHEQGSFNEPK	0.011		377	399	35	0.00015	49137	Protein slt1
O13791	SLT1_SCHPO	772.991	3	QPsPPVAEHFSNETFSAsPK			357	376	29.3	0.00084	49137	Protein slt1
O13791	SLT1_SCHPO	597.6	3	SKtSSQASVSDEELSR	0.007		220	235	31.2	0.0012	49137	Protein slt1
O13791	SLT1_SCHPO	788.349	3	SNVDSNDsASPKRPSSQAsLR			400	420	25.4	0.0012	49137	Protein slt1
O13791	SLT1_SCHPO	734.679	3	HIDLtARESPSTSFAQmSK	0.056	HIDLtARESPSTSFAQmSK	261	279	27.5	0.0014	49137	Protein slt1
O13796	YKY1_SCHPO	729.979	3	DLDNQSsDNEKLEGLESSK			116	134	48.7	1.7e-07	76364.5	Uncharacterized protein C1142.01
O13796	YKY1_SCHPO	904.084	3	SVsEEEQDEPLVEGESPIVSTNKK	0.017		72	95	48.1	2e-07	76364.5	Uncharacterized protein C1142.01
O13796	YKY1_SCHPO	966.169	4	ENNAINSEAEKsVsEEEQDEPLVEGESPIVSTNK			61	94	45.6	7.6e-07	76364.5	Uncharacterized protein C1142.01
O13796	YKY1_SCHPO	946.163	4	ENNAINSEAEKSVsEEEQDEPLVEGESPIVSTNK	0.004		61	94	43	1.1e-06	76364.5	Uncharacterized protein C1142.01
O13796	YKY1_SCHPO	861.381	3	SVsEEEQDEPLVEGESPIVSTNK	0.006		72	94	35.5	2.1e-06	76364.5	Uncharacterized protein C1142.01
O13796	YKY1_SCHPO	756.631	3	DLDNQssDNEKLEGLESSK			116	134	43.1	9.8e-06	76364.5	Uncharacterized protein C1142.01
O13796	YKY1_SCHPO	978.188	4	ENNAINSEAEKSVsEEEQDEPLVEGESPIVSTNKK	0		61	95	37.4	1.7e-05	76364.5	Uncharacterized protein C1142.01
O13796	YKY1_SCHPO	782	3	RDLDNQSsDNEKLEGLESSK	0		115	134	32.2	2e-05	76364.5	Uncharacterized protein C1142.01
O13797	O13797_SCHPO	902.912	2	AIEIDPTsPVYYSNR	0.007		109	123	42.1	5.6e-07	34002	TPR repeat protein
O13801	O13801_SCHPO	792.888	2	AIELsPSDAPYITK	0.042	AIELsPSDAPYITK	180	193	47.3	1.7e-07	66396.9	RNA-binding protein
O13801	O13801_SCHPO	530.731	2	sFGGNVPFR	NA		437	445	22.2	0.019	66396.9	RNA-binding protein
O13802	EBP2_SCHPO	597.599	3	SKsNDLDSLAATEFGR	0.008		296	311	37.3	2.6e-05	37819.1	Probable rRNA-processing protein ebp2
O13810	PROB_SCHPO	819.013	3	DYLVVHGLNSHHDSQVsSDEH	0.001		382	402	35	1.2e-06	43934.4	Probable glutamate 5-kinase
O13821	VPS27_SCHPO	807.036	3	IVVDsSPVTENPPSHSDVmGQK	0.007		497	518	38.2	4.5e-07	68243.7	Vacuolar protein sorting-associated protein 27
O13821	VPS27_SCHPO	801.715	3	IVVDsSPVTENPPSHSDVMGQK	0		497	518	30.3	0.0007	68243.7	Vacuolar protein sorting-associated protein 27
O13821	VPS27_SCHPO	785.371	2	NSSTIPQASSSsVPK	0.001		482	496	28.1	0.0031	68243.7	Vacuolar protein sorting-associated protein 27
O13821	VPS27_SCHPO	807.034	3	IVVDSSPVTENPPSHsDVmGQK	0.011		497	518	21	0.013	68243.7	Vacuolar protein sorting-associated protein 27
O13827	YEEB_SCHPO	674.962	3	FKGsPDMQSTDLDNLmK	0.119	FKGsPDMQSTDLDNLmK	191	207	44.9	1.9e-07	28218.8	Uncharacterized protein C19A8.11c
O13827	YEEB_SCHPO	680.293	3	FKGsPDmQSTDLDNLmK	0.091	FKGsPDmQSTDLDNLmK	191	207	44.7	2.3e-07	28218.8	Uncharacterized protein C19A8.11c
O13827	YEEB_SCHPO	669.623	3	FKGsPDMQSTDLDNLMK	0.172	FKGsPDMQSTDLDNLMK	191	207	42	7.2e-07	28218.8	Uncharacterized protein C19A8.11c
O13827	YEEB_SCHPO	674.948	3	FKGsPDmQSTDLDNLMK	0.079	FKGsPDmQSTDLDNLMK	191	207	32.5	0.00024	28218.8	Uncharacterized protein C19A8.11c
O13827	YEEB_SCHPO	674.96	3	FKGSPDmQsTDLDNLMK	0.126	FKGsPDmQSTDLDNLMK	191	207	22	0.044	28218.8	Uncharacterized protein C19A8.11c
O13830	PTH2_SCHPO	805.899	2	GNSsLAALALAEGQTK	0.006		77	92	33	1.8e-06	21428.8	Probable peptidyl-tRNA hydrolase 2
O13831	TRP_SCHPO	952.382	2	SVMMLGCEAGGDGVDtPK	0.378	SVMMLGCEAGGDGVDtPK	543	560	55	4e-13	75437.5	Tryptophan synthase
O13836	DOM3Z_SCHPO	827.596	4	ESDVHSDDGtIEEDASNAENPNLHYVELK	0.002		213	241	48.4	2.2e-06	40751.1	Protein din1
O13845	RSD1_SCHPO	654.981	3	EAAPLsPTEEESRPITR	0.094	EAAPLsPTEEESRPITR	460	476	42.2	1e-08	69450	RNA-binding protein rsd1
O13845	RSD1_SCHPO	584.876	3	YDDYsRsPPYSSR			171	183	42.6	1.1e-06	69450	RNA-binding protein rsd1
O13845	RSD1_SCHPO	558.227	3	YDDYSRsPPYSSR	0.004		171	183	34.9	3.1e-06	69450	RNA-binding protein rsd1
O13845	RSD1_SCHPO	716.99	3	NYESEGRLtPPPVSmGYR	0.006		66	83	35.9	1.5e-05	69450	RNA-binding protein rsd1
O13845	RSD1_SCHPO	654.592	3	EDSGyNDDVVTNSSSHR	0.008		95	111	26.6	0.00081	69450	RNA-binding protein rsd1
O13845	RSD1_SCHPO	711.66	3	NYESEGRLtPPPVSMGYR	0.011		66	83	32.3	0.0012	69450	RNA-binding protein rsd1
O13845	RSD1_SCHPO	654.974	3	EAAPLSPTEEESRPItR	0.08	EAAPLsPTEEESRPITR	460	476	25.5	0.0017	69450	RNA-binding protein rsd1
O13853	ITS3_SCHPO	646.979	3	VPsINGNESHSNVHVIR	0.171	VPsINGNESHSNVHVIR	543	559	36.7	6.6e-08	83748.3	Phosphatidylinositol-4-phosphate 5-kinase its3
O13853	ITS3_SCHPO	539.163	2	stLSSsQK			175	182	19.7	0.00053	83748.3	Phosphatidylinositol-4-phosphate 5-kinase its3
O13858	YEX7_SCHPO	717.84	2	QNsPSSQVPPVSK	0.033	QNsPSSQVPPVSK	274	286	40	5.3e-06	69794.4	Uncharacterized protein C1A6.07
O13858	YEX7_SCHPO	856.409	3	SKAsGEAPYSYPAPPVPSVNNAGAR	0.006		529	553	35.9	4.4e-05	69794.4	Uncharacterized protein C1A6.07
O13858	YEX7_SCHPO	709.324	2	qNsPSSQVPPVSK	0.007		274	286	36.3	6e-05	69794.4	Uncharacterized protein C1A6.07
O13862	RDP1_SCHPO	897.374	3	Acetyl-SEHsPEASSTYAQVTSNDELSSNK	0.006		1	25	46.1	1.6e-06	51766.9	Transcriptional activator protein rdp1
O13863	YDU2_SCHPO	829.724	3	LSSLSIYSEPsPDEASNLQELK	0.125	LSSLSIYSEPsPDEASNLQELK	47	68	50.9	2.8e-08	60708.9	Uncharacterized kinase C1B1.02c
O13868	ELOF1_SCHPO	884.685	3	EVDNINDQEAYsPEAAYEEEKE	0		86	107	47.9	3.9e-09	11803.4	Transcription elongation factor 1 homolog
O13868	ELOF1_SCHPO	841.674	3	EVDNINDQEAYsPEAAYEEEK	0		86	106	39.2	1.4e-06	11803.4	Transcription elongation factor 1 homolog
O13870	O13870_SCHPO	534.247	3	VAsPETPNATHTAPK	0.178	VAsPETPNATHTAPK	354	368	53.9	1.1e-09	71715.9	CCR4-Not complex subunit Not3/5
O13870	O13870_SCHPO	615.63	3	SVSQSsATTETNVKPTK	0		435	451	42	2e-07	71715.9	CCR4-Not complex subunit Not3/5
O13870	O13870_SCHPO	854.036	3	SSSsSHSPSPSASSSSSSENLLQDK	0.004		235	259	47	1.1e-06	71715.9	CCR4-Not complex subunit Not3/5
O13870	O13870_SCHPO	840.858	2	VAsPEtPNATHTAPK			354	368	41.9	1.2e-06	71715.9	CCR4-Not complex subunit Not3/5
O13870	O13870_SCHPO	706.817	2	VSADAsVQDIAEK	0.044	VSADAsVQDIAEK	266	278	39.3	2.8e-06	71715.9	CCR4-Not complex subunit Not3/5
O13870	O13870_SCHPO	643.303	4	ESPSHHYIMQQVRPETPNsPR	0.021	ESPSHHYIMQQVRPETPNsPR	387	407	35.6	1.2e-05	71715.9	CCR4-Not complex subunit Not3/5
O13870	O13870_SCHPO	872.913	4	SVSQSSATtETNVKPTKEENADVPVSSPDYLK	0.001		435	466	35.8	3.2e-05	71715.9	CCR4-Not complex subunit Not3/5
O13870	O13870_SCHPO	880.685	3	SSsSSHSPsPSASSSSSSENLLQDK			235	259	42	3.4e-05	71715.9	CCR4-Not complex subunit Not3/5
O13870	O13870_SCHPO	871.887	2	EENADVPVSsPDYLK	0		452	466	28.9	0.00029	71715.9	CCR4-Not complex subunit Not3/5
O13870	O13870_SCHPO	663.296	4	EsPSHHYIMQQVRPETPNsPR			387	407	27.4	0.0015	71715.9	CCR4-Not complex subunit Not3/5
O13870	O13870_SCHPO	426.852	3	WDSLGHTAsPK	0.006		417	427	24.6	0.0032	71715.9	CCR4-Not complex subunit Not3/5
O13870	O13870_SCHPO	647.295	4	ESPSHHYImQQVRPEtPNSPR	0.022	ESPSHHYImQQVRPETPNsPR	387	407	20.3	0.011	71715.9	CCR4-Not complex subunit Not3/5
O13870	O13870_SCHPO	667.29	4	EsPSHHYImQQVRPEtPNSPR			387	407	22.1	0.026	71715.9	CCR4-Not complex subunit Not3/5
O13892	YE38_SCHPO	930.078	3	sDSESTEATSNERPFNPVSAANLER	0.002		110	134	51.9	1.3e-06	119232	Uncharacterized protein C20G4.08
O13892	YE38_SCHPO	604.937	3	HSTASPSTVNsGFSTPR	0		667	683	33	0.00018	119232	Uncharacterized protein C20G4.08
O13892	YE38_SCHPO	604.941	3	HSTASPSTVNSGFStPR	0		667	683	27.4	0.002	119232	Uncharacterized protein C20G4.08
O13892	YE38_SCHPO	736.836	4	RSDSESTEATsNERPFNPVSAANLER	0.007		109	134	25.7	0.02	119232	Uncharacterized protein C20G4.08
O13900	SA114_SCHPO	851.759	3	GGISSTTSVSPAAQAsPVLSTTTQPK	0.034	GGISSTTSVSPAAQAsPVLSTTTQPK	343	368	48.6	2.3e-08	54409.9	Pre-mRNA-splicing factor sap114
O13900	SA114_SCHPO	851.758	3	GGISSTTsVSPAAQASPVLSTTTQPK	0.003		343	368	38.9	1.8e-06	54409.9	Pre-mRNA-splicing factor sap114
O13900	SA114_SCHPO	682.809	2	EPISsPEQELR	0.008		202	212	26.1	0.0021	54409.9	Pre-mRNA-splicing factor sap114
O13905	YF3E_SCHPO	724.308	3	EDDVStPTHEASSSVFLNR	0		118	136	52.7	7.8e-10	39397.5	BSD domain-containing protein C22A12.14c
O13905	YF3E_SCHPO	721.296	3	AIQSGNDEEEIFsWGDER	0.111	AIQSGNDEEEIFsWGDER	223	240	44.5	1.5e-06	39397.5	BSD domain-containing protein C22A12.14c
O13905	YF3E_SCHPO	730.335	3	GLQIETQPAsHDGEVDGEVK	0.076	GLQIETQPAsHDGEVDGEVK	287	306	40.9	3e-06	39397.5	BSD domain-containing protein C22A12.14c
O13907	O13907_SCHPO	624.284	2	SPsISKEEYK	0.043	SPsISKEEYK	22	31	36	3.3e-07	53943	ATP-citrate synthase subunit 2
O13910	MPP10_SCHPO	867.029	3	KDLFAsDEEDDVSADQLSSYER	0.099	KDLFAsDEEDDVSADQLSSYER	281	302	55.5	1.8e-09	67707.6	U3 small nucleolar ribonucleoprotein protein mpp10
O13910	MPP10_SCHPO	824.327	3	DLFAsDEEDDVSADQLSSYER	0.062	DLFAsDEEDDVSADQLSSYER	282	302	46.2	8.5e-08	67707.6	U3 small nucleolar ribonucleoprotein protein mpp10
O13910	MPP10_SCHPO	970.731	3	NDVQQNVIEENNESsDNEYATFDR	0		255	278	45.3	1.5e-06	67707.6	U3 small nucleolar ribonucleoprotein protein mpp10
O13911	PNK1_SCHPO	796.843	2	sPPQESLTSYFEK	0.056	sPPQESLTSYFEK	8	20	33.8	1.8e-07	48477.7	Bifunctional polynucleotide phosphatase/kinase
O13919	PST2_SCHPO	723.845	2	SNsITQLTEFVK	0.009		641	652	45.3	1.4e-07	124850	Paired amphipathic helix protein pst2
O13923	CORO_SCHPO	676.82	2	DIsAVNLADLNK	NA		551	562	42.9	2e-07	67016	Coronin-like protein crn1
O13923	CORO_SCHPO	503.58	3	DIsAVNLADLNKR	NA		551	563	38.1	2.5e-06	67016	Coronin-like protein crn1
O13923	CORO_SCHPO	634.974	3	SFPKPASsPVTFSEDVK	0		494	510	34.7	5e-05	67016	Coronin-like protein crn1
O13923	CORO_SCHPO	677.668	3	SFPKPAsSPVTFSEDVKK	0		494	511	37	8.8e-05	67016	Coronin-like protein crn1
O13923	CORO_SCHPO	641.808	4	ESAEEQKPSKEPEVKPTtPSASK	0.001		440	462	23	0.0028	67016	Coronin-like protein crn1
O13923	CORO_SCHPO	588.792	4	HNEEKVEtPKPEAQPVSKPK	0.21	HNEEKVEtPKPEAQPVSKPK	420	439	23.8	0.0058	67016	Coronin-like protein crn1
O13923	CORO_SCHPO	683.328	4	sFPKPASSPVTFSEDVKKEPSEEK	0.04	sFPKPASSPVTFSEDVKKEPSEEK	494	517	23.6	0.038	67016	Coronin-like protein crn1
O13930	SEC2_SCHPO	587.766	2	KsFDEELVK	NA		74	82	34.3	4.5e-05	59053.7	Rab guanine nucleotide exchange factor sec2
O13930	SEC2_SCHPO	523.722	2	sFDEELVK	NA		75	82	26.5	0.00024	59053.7	Rab guanine nucleotide exchange factor sec2
O13936	SPT5_SCHPO	892.377	2	AsPNGSDLLNDDSEAAK	0.02		35	51	46.8	9.1e-09	109015	Transcription elongation factor spt5
O13936	SPT5_SCHPO	782.009	3	sIDKDANSTEVDAAEQDAASVK	0.012		8	29	54.5	1.4e-08	109015	Transcription elongation factor spt5
O13936	SPT5_SCHPO	812.342	3	INStRAsPNGSDLLNDDSEAAK			30	51	42.6	8.1e-06	109015	Transcription elongation factor spt5
O13939	AP3B_SCHPO	559.262	2	ALsSDNFKR	0.026	ALsSDNFKR	643	651	35.5	8.3e-06	83871.9	AP-3 complex subunit beta
O13939	AP3B_SCHPO	481.205	2	ALsSDNFK	0.022	ALsSDNFK	643	650	30.2	2.1e-05	83871.9	AP-3 complex subunit beta
O13939	AP3B_SCHPO	772.711	3	DVLPINPHTGNIYSNNsPGVK	0.003		622	642	33.1	0.00039	83871.9	AP-3 complex subunit beta
O13940	GLY1_SCHPO	674.784	2	Acetyl-SGsVTSTTTETR	0.005		1	13	37.9	3.6e-06	41318.8	Probable threonine aldolase
O13940	GLY1_SCHPO	693.763	2	sGsVTSTTTETR			1	13	20.2	0.028	41318.8	Probable threonine aldolase
O13944	YEH1_SCHPO	779.352	2	VEDIsDSDIPImK	0.028	VEDIsDSDIPImK	415	427	40.2	6.3e-07	106810	Oxysterol-binding protein homolog C23H4.01c
O13944	YEH1_SCHPO	804.033	3	SSVAHNEKVEDIsDSDIPImK	0.018		407	427	35.2	1.6e-05	106810	Oxysterol-binding protein homolog C23H4.01c
O13944	YEH1_SCHPO	798.704	3	SSVAHNEKVEDIsDSDIPIMK	0.039	SSVAHNEKVEDIsDSDIPIMK	407	427	35	2.3e-05	106810	Oxysterol-binding protein homolog C23H4.01c
O13944	YEH1_SCHPO	504.222	3	SASSHNFsVPEIR	0.036	SASSHNFsVPEIR	288	300	34.6	0.00011	106810	Oxysterol-binding protein homolog C23H4.01c
O13944	YEH1_SCHPO	835.37	3	KQPFHDLMDSSsPDDSSFANAK	0.008		492	513	28.4	0.00011	106810	Oxysterol-binding protein homolog C23H4.01c
O13944	YEH1_SCHPO	771.333	2	VEDISDsDIPIMK	0.013		415	427	19.3	0.03	106810	Oxysterol-binding protein homolog C23H4.01c
O13953	EAF3_SCHPO	596.788	2	SEsPIPQQVK	0.014		129	138	37.5	2.5e-06	39138.6	Chromatin modification-related protein eaf3
O13953	EAF3_SCHPO	713.644	3	sRESSTVTVDGDSHELPSR	0.015		105	123	27	0.0019	39138.6	Chromatin modification-related protein eaf3
O13964	YE44_SCHPO	688.612	3	KEDVREsPVDTFmENAT	0.07	KEDVREsPVDTFmENAT	105	121	23.1	0.0014	13789.1	Uncharacterized protein C24C9.04
O13965	MUG70_SCHPO	786.701	3	TVGTLSVVSSTASDtASHVSDTR	0.009		1	24	40	1.5e-06	79254.3	Meiotically up-regulated gene 70 protein
O13972	GLYD_SCHPO	714.33	2	Acetyl-SsNDSIMLTPLK	0.016		1	13	37.6	2.7e-06	51861.5	Probable serine hydroxymethyltransferase, cytosolic
O13972	GLYD_SCHPO	722.323	2	Acetyl-SsNDSImLTPLK	0		1	13	32.1	7.7e-06	51861.5	Probable serine hydroxymethyltransferase, cytosolic
O13985	O13985_SCHPO	880.409	3	SAsPSSIDDSQDNTAGGPATTTLIPR	0.002		468	493	50.8	1.6e-07	57426.4	WD repeat protein Cac2
O14014	RGA3_SCHPO	877.916	2	QQQIEsPTATFPLSK	0.019		264	278	36.7	5.6e-06	108650	Probable Rho-type GTPase-activating protein 3
O14014	RGA3_SCHPO	869.396	2	qQQIEsPTATFPLSK	0.021	qQQIEsPTATFPLSK	264	278	33.2	8.1e-05	108650	Probable Rho-type GTPase-activating protein 3
O14026	SET2_SCHPO	957.424	2	SGTATTTPtDSPSIGESPK	0.004		777	795	36.5	0.00021	90680	Histone-lysine N-methyltransferase, H3 lysine-36 specific
O14026	SET2_SCHPO	578.934	3	KHPALHSSRPsDsR			551	564	26.6	0.0037	90680	Histone-lysine N-methyltransferase, H3 lysine-36 specific
O14027	PDX1_SCHPO	750.805	2	smSPDELYTYAK	0.006		178	189	40.1	3.6e-07	31403.6	Probable pyridoxine biosynthesis PDX1-like protein
O14027	PDX1_SCHPO	742.81	2	sMSPDELYTYAK	0.062	sMSPDELYTYAK	178	189	47.1	8.6e-07	31403.6	Probable pyridoxine biosynthesis PDX1-like protein
O14027	PDX1_SCHPO	571.254	3	VKSMsPDELYTYAK	0		176	189	27.5	0.0017	31403.6	Probable pyridoxine biosynthesis PDX1-like protein
O14027	PDX1_SCHPO	576.593	3	VKSmsPDELYTYAK	0.004		176	189	29.8	0.0021	31403.6	Probable pyridoxine biosynthesis PDX1-like protein
O14029	SEC16_SCHPO	623.313	2	EPGILSPLsPR	0.066	EPGILSPLsPR	782	792	49.7	1.8e-09	218092	COPII coat assembly protein sec16
O14029	SEC16_SCHPO	598.785	2	sPGFTPLAAQK	0.086	sPGFTPLAAQK	899	909	38	2.6e-07	218092	COPII coat assembly protein sec16
O14029	SEC16_SCHPO	615.294	3	SSAsPPANAPIVSSDVHK	0.026	SSAsPPANAPIVSSDVHK	561	578	38.5	4.9e-07	218092	COPII coat assembly protein sec16
O14029	SEC16_SCHPO	760.685	3	EIYDNDETIPKPPsPEVEK	0.166	EIYDNDETIPKPPsPEVEK	177	195	47.1	2.2e-06	218092	COPII coat assembly protein sec16
O14029	SEC16_SCHPO	765.642	3	Acetyl-MDIESDHEPKESsVDLEGR	0.005		1	19	34.6	9.3e-06	218092	COPII coat assembly protein sec16
O14029	SEC16_SCHPO	829.344	2	EFNNDSVVLNTtPK	0.009		265	278	25.1	0.00096	218092	COPII coat assembly protein sec16
O14029	SEC16_SCHPO	640.654	3	RPATTTVGHTPNLySPK	0.005		696	712	26.6	0.0015	218092	COPII coat assembly protein sec16
O14031	O14031_SCHPO	676.276	2	tAsKTsLTFR			37	46	25	0.00077	96302.8	OPT oligopeptide transporter family
O14036	SMD2_SCHPO	613.778	2	SELsEIELAR	0.081	SELsEIELAR	10	19	36.2	4.8e-05	13095.4	Probable small nuclear ribonucleoprotein Sm D2
O14049	RS8A_SCHPO	825.346	2	LDsGNFSWGSEGVSK	0.144	LDsGNFSWGSEGVSK	60	74	41.4	1.2e-06	22593	40S ribosomal protein S8-A
O14055	SYYC_SCHPO	843.895	2	Acetyl-SLtPDEKYELITR	0.006		1	14	40.1	2.6e-07	44575.9	Tyrosyl-tRNA synthetase, cytoplasmic
O14059	HIS9_SCHPO	552.244	2	FVGTNGITNt	0.054	FVGTNGITNt	297	306	22	0.0011	35050.8	Probable histidinol-phosphatase
O14064	BIR1_SCHPO	578.278	2	ILQTNFsPR	0.099	ILQTNFsPR	495	503	46.5	6.1e-06	112581	Protein bir1
O14065	YC31_SCHPO	689.32	3	FDHVTGtAENRPQTPSTK	0.003		78	95	41.4	6.2e-07	156033	Uncharacterized protein C962.01
O14065	YC31_SCHPO	658.337	3	RPPSTVGsQTGSLVNAPPK	0.006		52	70	27.2	0.0019	156033	Uncharacterized protein C962.01
O14066	IRS4_SCHPO	538.763	2	HsVSLGQIR	0.063	HsVSLGQIR	1027	1035	24.1	0.0017	150019	Increased rDNA silencing protein 4
O14075	YEAA_SCHPO	922.945	2	NGIVNDsLPNLVPEQR	NA		315	330	35.1	4.2e-05	36701.6	Putative 2-hydroxyacid dehydrogenase UNK4.10
O14076	YEAB_SCHPO	582.611	3	VNELSQDVIsLHSPK	0.016		155	169	40.6	4.2e-06	21505.4	Uncharacterized protein UNK4.11c
O14076	YEAB_SCHPO	625.322	3	KVNELSQDVISLHsPK	0.038	KVNELSQDVISLHsPK	154	169	44.8	7e-06	21505.4	Uncharacterized protein UNK4.11c
O14079	YEAE_SCHPO	824.054	3	SPsSVSQSLSGDPSLKPAEVFDR	0.021	sPSSVSQSLSGDPSLKPAEVFDR	149	171	44.9	9.4e-08	58354.8	Uncharacterized protein UNK4.14
O14079	YEAE_SCHPO	745.7	3	mGVMTVPNtPQKPNLQQQK	0.121	mGVMTVPNtPQKPNLQQQK	1	19	35.5	6.1e-07	58354.8	Uncharacterized protein UNK4.14
O14079	YEAE_SCHPO	941.116	3	QsAEINSPIEKDVNPQQNISDSSIK	0.037	QSAEINsPIEKDVNPQQNISDSSIK	173	197	38.2	4.2e-06	58354.8	Uncharacterized protein UNK4.14
O14079	YEAE_SCHPO	935.427	3	qSAEINsPIEKDVNPQQNISDSSIK	0.01		173	197	40.4	6.7e-06	58354.8	Uncharacterized protein UNK4.14
O14079	YEAE_SCHPO	745.707	3	MGVmTVPNtPQKPNLQQQK	0.12	MGVmTVPNtPQKPNLQQQK	1	19	32	7.8e-06	58354.8	Uncharacterized protein UNK4.14
O14079	YEAE_SCHPO	740.364	3	MGVMTVPNtPQKPNLQQQK	0.171	MGVMTVPNtPQKPNLQQQK	1	19	31.8	0.00031	58354.8	Uncharacterized protein UNK4.14
O14079	YEAE_SCHPO	822.369	4	NNsIHSDEVNPEVRPDLTPSNENEESKR	0.007		198	225	36	0.00039	58354.8	Uncharacterized protein UNK4.14
O14079	YEAE_SCHPO	987.766	3	LVLDGQHVEGDHSsDTEEEVVSEDQK	0		99	124	36.1	0.00041	58354.8	Uncharacterized protein UNK4.14
O14079	YEAE_SCHPO	648.294	2	QSAEINsPIEK	0.043	QSAEINsPIEK	173	183	25.6	0.00068	58354.8	Uncharacterized protein UNK4.14
O14079	YEAE_SCHPO	631.787	2	qGsDQVIPLSR	0.222	qGsDQVIPLSR	46	56	25.8	0.0009	58354.8	Uncharacterized protein UNK4.14
O14081	TPSX_SCHPO	702.806	2	sLSFSMNGTPQR	0.023	sLSFSMNGTPQR	175	186	43.4	5.5e-08	106819	Putative alpha,alpha-trehalose-phosphate synthase [UDP-forming] 106 kDa subunit
O14081	TPSX_SCHPO	710.802	2	SLsFSmNGTPQR	0.004		175	186	47.1	7e-08	106819	Putative alpha,alpha-trehalose-phosphate synthase [UDP-forming] 106 kDa subunit
O14081	TPSX_SCHPO	675.8	2	NDGTNLSLPPsR	0.158	NDGTNLSLPPsR	131	142	41.2	1.6e-07	106819	Putative alpha,alpha-trehalose-phosphate synthase [UDP-forming] 106 kDa subunit
O14081	TPSX_SCHPO	726.329	4	NDGTNLsLPPSRHQsPPPSSVLASQR			131	156	38.4	9.4e-06	106819	Putative alpha,alpha-trehalose-phosphate synthase [UDP-forming] 106 kDa subunit
O14081	TPSX_SCHPO	675.814	2	NDGTNLsLPPSR	0.029	NDGTNLsLPPSR	131	142	38.2	1.6e-05	106819	Putative alpha,alpha-trehalose-phosphate synthase [UDP-forming] 106 kDa subunit
O14081	TPSX_SCHPO	524.255	3	HQsPPPSSVLASQR	0.106	HQsPPPSSVLASQR	143	156	41.5	1.9e-05	106819	Putative alpha,alpha-trehalose-phosphate synthase [UDP-forming] 106 kDa subunit
O14081	TPSX_SCHPO	490.21	3	RHDsELEEFAR	NA		160	170	34.7	6.4e-05	106819	Putative alpha,alpha-trehalose-phosphate synthase [UDP-forming] 106 kDa subunit
O14081	TPSX_SCHPO	710.805	2	SLSFsmNGTPQR	0.001		175	186	38.2	8.8e-05	106819	Putative alpha,alpha-trehalose-phosphate synthase [UDP-forming] 106 kDa subunit
O14081	TPSX_SCHPO	702.801	2	SLSFsMNGTPQR			175	186	40.3	0.0001	106819	Putative alpha,alpha-trehalose-phosphate synthase [UDP-forming] 106 kDa subunit
O14081	TPSX_SCHPO	526.243	3	SLSFsmNGTPQRR	0.04	SLSFSmNGtPQRR	175	187	29.9	0.00034	106819	Putative alpha,alpha-trehalose-phosphate synthase [UDP-forming] 106 kDa subunit
O14081	TPSX_SCHPO	656.758	2	HDsELEEFAR	NA		161	170	23.9	0.00061	106819	Putative alpha,alpha-trehalose-phosphate synthase [UDP-forming] 106 kDa subunit
O14081	TPSX_SCHPO	589.725	2	MtFDAEAWK	NA		188	196	30.1	0.00084	106819	Putative alpha,alpha-trehalose-phosphate synthase [UDP-forming] 106 kDa subunit
O14093	O14093_SCHPO	774.352	2	sLSAASLSSLSDSSR	0.024	sLSAASLSSLSDSSR	481	495	43.1	1.7e-09	107951	GARP complex subunit Vps54
O14093	O14093_SCHPO	774.352	2	SLSAASLSSLSDSsR	0		481	495	55.8	2.8e-09	107951	GARP complex subunit Vps54
O14093	O14093_SCHPO	774.355	2	SLSAASLsSLSDSSR	0.009		481	495	36.7	4e-05	107951	GARP complex subunit Vps54
O14093	O14093_SCHPO	578.271	2	ESsINGSLLR	0.007		113	122	32.7	0.00024	107951	GARP complex subunit Vps54
O14093	O14093_SCHPO	725.342	2	VyQLILGAGtVR			755	766	16.7	0.043	107951	GARP complex subunit Vps54
O14098	O14098_SCHPO	637.27	3	AFsPRPGsPPSPSFYR			102	117	24.6	0.0028	67366.9	Latrunculin sensitive kinase Lsk1
O14098	O14098_SCHPO	664.317	4	RPSSsPPPIPSIPHETTSSDTQKK	0.025	RPSSsPPPIPSIPHETTSSDTQKK	187	210	24.5	0.0041	67366.9	Latrunculin sensitive kinase Lsk1
O14104	LYS12_SCHPO	637.616	3	TECNAALFGAVQsPTHK	0.013		69	85	38.1	3.4e-05	39256.5	Probable homoisocitrate dehydrogenase
O14111	YEJF_SCHPO	883.043	3	VTNKQIDNVESCLsGDESNDSKK	0.014		39	61	23.2	0.006	109730	C2 domain-containing protein C31G5.15
O14112	RS10A_SCHPO	744.813	2	DEGAAPSGFAPsFR	0.017		124	137	35.9	3e-05	16275.7	40S ribosomal protein S10-A
O14112	RS10A_SCHPO	539.575	3	KDEGAAPSGFAPsFR	0.186	KDEGAAPSGFAPsFR	123	137	36.4	3.1e-05	16275.7	40S ribosomal protein S10-A
O14114	YEJJ_SCHPO	688.297	3	SQDEEEsEEEHRPILR	0.118	SQDEEEsEEEHRPILR	133	148	39.2	4e-05	135352	Uncharacterized AAA domain-containing protein C31G5.19
O14114	YEJJ_SCHPO	518.263	2	VQsPLLNGK	NA		1045	1053	33.2	5.8e-05	135352	Uncharacterized AAA domain-containing protein C31G5.19
O14114	YEJJ_SCHPO	841.422	3	DKVQsPLLNGKsPVGVPSEAALR			1043	1065	29.7	0.00059	135352	Uncharacterized AAA domain-containing protein C31G5.19
O14114	YEJJ_SCHPO	760.376	3	VQsPLLNGKsPVGVPSEAALR			1045	1065	24.6	0.012	135352	Uncharacterized AAA domain-containing protein C31G5.19
O14120	MVP1_SCHPO	665.332	2	sLPHAQQSIIR	0.201	sLPHAQQSIIR	181	191	25.3	0.0046	76861.3	Sorting nexin mvp1
O14131	MU191_SCHPO	643.814	2	LSPELTAsFNK	0.02		356	366	41.5	5.6e-07	49780.8	Meiotically up-regulated gene 191 protein
O14132	PIT1_SCHPO	565.607	3	VSAPADAVAsKEEVNK	0.178	VSAPADAVAsKEEVNK	338	353	39	2.1e-06	72826.9	Sporulation protein kinase pit1
O14132	PIT1_SCHPO	516.912	3	SPPsFHATQDLLR	0.053	SPPsFHATQDLLR	574	586	19.6	0.0032	72826.9	Sporulation protein kinase pit1
O14134	ELF1_SCHPO	576.269	2	ELAWLQsPK	NA		1035	1043	35.7	3.8e-06	116702	mRNA export factor elf1
O14134	ELF1_SCHPO	528.168	2	sFFSDDEE			1050	1057	18.8	0.0056	116702	mRNA export factor elf1
O14141	YEW3_SCHPO	497.259	2	IILASGsPR	0.02		27	35	42.1	1e-08	26305.1	Protein C3G6.03c
O14146	YEWA_SCHPO	700.639	3	DFYNLPGSNsSSSTVSTTR	0.02		11	29	31.7	0.00014	17513.4	Uncharacterized protein C3G6.10c
O14148	O14148_SCHPO	550.25	3	LsPNSSQSQITHNR	0.089	LsPNSSQSQITHNR	271	284	34.5	1.6e-06	183050	SNF2 family helicase Ino80
O14148	O14148_SCHPO	928.738	3	NDNNDASLQSAGVAsDGESSPETPLTK	0.016		504	530	28.6	0.00073	183050	SNF2 family helicase Ino80
O14148	O14148_SCHPO	585.795	4	GLPPAQKLsPNSSQSQITHNR	0.001		264	284	22.3	0.012	183050	SNF2 family helicase Ino80
O14150	RS14_SCHPO	762.344	2	IEDVTPIPTDsTR	0.009		117	129	40.3	5e-06	14699.1	40S ribosomal protein S14
O14150	RS14_SCHPO	560.603	3	IEDVTPIPTDsTRR	0.027	IEDVTPIPTDStRR	117	130	31.8	0.0001	14699.1	40S ribosomal protein S14
O14157	MYO3_SCHPO	545.604	3	ISNLPSSQPGsPSKR	0.033	ISNLPSSQPGsPSKR	1411	1425	37.9	4e-05	242574	Myosin type-2 heavy chain 2
O14164	EIF3C_SCHPO	817.999	3	GGSSDSDAESVDsSEENRLTSSR	0.016		7	29	62.2	8.1e-10	104368	Probable eukaryotic translation initiation factor 3 subunit C
O14164	EIF3C_SCHPO	451.707	2	sGPSSFLK	0.284	sGPSSFLK	132	139	31.2	1.1e-05	104368	Probable eukaryotic translation initiation factor 3 subunit C
O14164	EIF3C_SCHPO	549.582	3	FGQFtPDQDRLDK	NA		663	675	29.8	0.0014	104368	Probable eukaryotic translation initiation factor 3 subunit C
O14176	PRP40_SCHPO	871.863	2	NIVDDAESsEEGEIR	0.003		681	695	38	7e-05	81931.2	Pre-mRNA-processing protein prp40
O14186	YDSB_SCHPO	681.317	2	VAsFESNISSLK	0.057	VAsFESNISSLK	384	395	34.5	7.1e-06	93228.7	Uncharacterized WD repeat-containing protein C4F8.11
O14187	SPP42_SCHPO	615.313	2	DLILADyAKK	NA		2009	2018	25.5	0.015	274558	Pre-mRNA-splicing factor spp42
O14188	RNG2_SCHPO	584.62	3	LQSQAGAPVGTKGsNTR	0.005		10	26	43.3	8.3e-08	171678	Ras GTPase-activating-like protein rng2
O14192	AATR1_SCHPO	506.562	3	DLSHHLSVESAsR	0.001		7	19	24.7	0.00037	53167.1	Aromatic amino acid aminotransferase C56E4.03
O14192	AATR1_SCHPO	571.255	3	EMDAEIPAINsWKK	NA		55	68	26.6	0.0017	53167.1	Aromatic amino acid aminotransferase C56E4.03
O14196	MU165_SCHPO	716.309	3	SPESIASSQsNDSAAIPSYR	0		60	79	26	0.0033	34645.5	Meiotically up-regulated gene 165 protein
O14214	TRM10_SCHPO	832.634	4	DALDIGKDDTNTsEADVSKNETQEQPVLSK	0.006		5	34	41.7	1.5e-06	35470.5	tRNA
O14224	O14224_SCHPO	482.699	2	sLNEYMK	0.191	sLNEYMK	34	40	28.8	3.3e-07	23031.9	Rho GDP dissociation inhibitor Rdi1
O14224	O14224_SCHPO	611.289	3	ASLGITGTGYsPSNDRR	0.009		53	69	41	2.6e-06	23031.9	Rho GDP dissociation inhibitor Rdi1
O14224	O14224_SCHPO	490.697	2	sLNEYmK	0.131	sLNEYmK	34	40	31.3	5.8e-06	23031.9	Rho GDP dissociation inhibitor Rdi1
O14224	O14224_SCHPO	868.368	4	sVNNEVSADQHNPELEDDTFEHGPPVSLGEK	0.031	sVNNEVSADQHNPELEDDTFEHGPPVSLGEK	1	32	36	7.4e-06	23031.9	Rho GDP dissociation inhibitor Rdi1
O14224	O14224_SCHPO	611.285	3	ASLGITGTGYSPsNDRR	0.004		53	69	41.8	1.3e-05	23031.9	Rho GDP dissociation inhibitor Rdi1
O14233	RNA14_SCHPO	796.667	3	Acetyl-mNSDDNVEADASSNIIKDsPK	0.071	mNSDDNVEADASSNIIKDsPK	1	21	46	2.3e-08	83926.5	mRNA 3'-end-processing protein rna14
O14233	RNA14_SCHPO	791.345	3	Acetyl-MNSDDNVEADASSNIIKDsPK	0.056	MNSDDNVEADASSNIIKDsPK	1	21	41.1	1.3e-07	83926.5	mRNA 3'-end-processing protein rna14
O14233	RNA14_SCHPO	803.984	3	MNSDDNVEADASsNIIKDsPK			1	21	30.3	1.8e-05	83926.5	mRNA 3'-end-processing protein rna14
O14233	RNA14_SCHPO	809.31	3	mNsDDNVEADASSNIIKDsPK			1	21	22.3	0.0053	83926.5	mRNA 3'-end-processing protein rna14
O14248	TEA3_SCHPO	797.332	2	LNDTAGsFSGEEMR	0.023	LNDTAGsFSGEEMR	1072	1085	44.5	1.7e-07	127756	Tip elongation aberrant protein 3
O14248	TEA3_SCHPO	593.292	2	FLSLsPQVSK	0.073	FLSLsPQVSK	1054	1063	47.5	7.5e-07	127756	Tip elongation aberrant protein 3
O14248	TEA3_SCHPO	987.931	2	SSESSsPINESESNSLLK	0		518	535	48.5	1e-06	127756	Tip elongation aberrant protein 3
O14248	TEA3_SCHPO	591.256	2	qNEsASELLK	0.071	qNEsASELLK	685	694	36.4	1.9e-06	127756	Tip elongation aberrant protein 3
O14248	TEA3_SCHPO	494.591	3	KLsEVQIALADSK	0.358	KLsEVQIALADSK	948	960	35.6	3.3e-06	127756	Tip elongation aberrant protein 3
O14248	TEA3_SCHPO	684.344	2	RLsDVINSQQK	0.07	RLsDVINSQQK	1043	1053	37.5	3.3e-06	127756	Tip elongation aberrant protein 3
O14248	TEA3_SCHPO	704.643	3	DSTDVHLPTDFSASSsPLR	0		969	987	38	3.4e-06	127756	Tip elongation aberrant protein 3
O14248	TEA3_SCHPO	731.292	3	DSTDVHLPTDFsASSsPLR			969	987	36.2	5.2e-06	127756	Tip elongation aberrant protein 3
O14248	TEA3_SCHPO	805.317	2	LNDTAGsFSGEEmR	0.011		1072	1085	27.8	2.1e-05	127756	Tip elongation aberrant protein 3
O14248	TEA3_SCHPO	569.268	3	HYAsLDEQGLHSLR	0.035	HYAsLDEQGLHSLR	457	470	29.4	0.00037	127756	Tip elongation aberrant protein 3
O14248	TEA3_SCHPO	642.302	2	TGHSmLLVDsK	0.071	TGHSmLLVDsK	170	180	20.9	0.044	127756	Tip elongation aberrant protein 3
O14250	PSA1_SCHPO	888.352	2	NQYDGDATTWsPQGR	0.007		4	18	51.5	1e-08	30111.1	Probable proteasome subunit alpha type-1
O14250	PSA1_SCHPO	838.334	3	AAAEEPQAPTAEAILDSADAmEtD	0.038	AAAEEPQAPTAEAILDSADAmEtD	249	272	45.6	4e-08	30111.1	Probable proteasome subunit alpha type-1
O14250	PSA1_SCHPO	838.349	3	AAAEEPQAPtAEAILDSADAmETD	0.044	AAAEEPQAPTAEAILDsADAmETD	249	272	23.1	0.0026	30111.1	Probable proteasome subunit alpha type-1
O14259	YFP2_SCHPO	451.201	2	sTEIPFK	0.016		266	272	28.9	4.5e-05	46782.8	SH3 domain-containing protein C7D4.02c
O14261	TAF1_SCHPO	701.824	2	LSEYLGFPGsPR	0.568	LSEYLGFPGsPR	450	461	41.9	7e-08	106771	Taz1-interacting factor 1
O14261	TAF1_SCHPO	419.523	3	TSFTDsHILR	0.043	TSFtDSHILR	547	556	35.1	9.8e-05	106771	Taz1-interacting factor 1
O14261	TAF1_SCHPO	867.32	2	ECVTQPGFDsDNER	0.09	ECVTQPGFDsDNER	735	748	30.3	0.0038	106771	Taz1-interacting factor 1
O14261	TAF1_SCHPO	671.284	4	ECVTQPGFDsDNERDGHASIPDR	0.043	ECVTQPGFDsDNERDGHASIPDR	735	757	28.5	0.0084	106771	Taz1-interacting factor 1
O14267	O14267_SCHPO	448.708	2	APsPAAFR	NA		58	65	30.8	6e-06	83359.8	DUF1212 family protein
O14269	YFPE_SCHPO	530.923	3	LPsPPQSTRPSSTR	0.016		283	296	28.9	1.4e-05	62591.3	Uncharacterized protein C7D4.14c
O14269	YFPE_SCHPO	599.774	2	FPsVPLSDEK	0.221	FPsVPLSDEK	297	306	33.2	0.00021	62591.3	Uncharacterized protein C7D4.14c
O14273	YET4_SCHPO	780.327	3	StATTQsADYVVAEHFAPQR			170	189	47.2	4.2e-07	67036.6	Meiotically up-regulated protein C8C9.04
O14273	YET4_SCHPO	753.666	3	STATTQsADYVVAEHFAPQR	0.016		170	189	45.4	4.2e-07	67036.6	Meiotically up-regulated protein C8C9.04
O14273	YET4_SCHPO	867.389	2	qASAPSsPGTTSAAVPGGK	0		517	535	38.3	7.6e-07	67036.6	Meiotically up-regulated protein C8C9.04
O14273	YET4_SCHPO	949.759	3	NDEQLGNsPAsITSKPATTSAAQPSSK			190	216	42.4	1.5e-06	67036.6	Meiotically up-regulated protein C8C9.04
O14273	YET4_SCHPO	875.904	2	QASAPSsPGTTSAAVPGGK	0		517	535	37.1	3.2e-06	67036.6	Meiotically up-regulated protein C8C9.04
O14273	YET4_SCHPO	923.109	3	NDEQLGNSPASITsKPATTSAAQPSSK	0.015		190	216	42.6	6.4e-06	67036.6	Meiotically up-regulated protein C8C9.04
O14273	YET4_SCHPO	598.615	3	KPSsTGQEPTTPSTPAK	0.005		487	503	34.4	1.2e-05	67036.6	Meiotically up-regulated protein C8C9.04
O14273	YET4_SCHPO	780.328	3	STAtTQSADyVVAEHFAPQR			170	189	31.8	7.9e-05	67036.6	Meiotically up-regulated protein C8C9.04
O14277	RS5A_SCHPO	949.447	2	Acetyl-ATSSLTPGVSLDENGsIK	0.045	MATSSLTPGVSLDENGsIK	1	19	25.9	0.0097	22224.8	40S ribosomal protein S5-A
O14283	PRR1_SCHPO	688.81	2	SFsQISNDSLAK	0.032	SFsQISNDSLAK	332	343	30.9	0.0003	60046.3	Transcription factor prr1
O14289	LEU2_SCHPO	946.44	2	EFFGDVSNGsPSIITNK	0.021	EFFGDVSNGsPSIITNK	477	493	49.6	4.1e-08	82783.7	3-isopropylmalate dehydratase
O14289	LEU2_SCHPO	610.771	2	VFIGsCTNSR	0.037	VFIGsCTNSR	354	363	45.1	3.4e-06	82783.7	3-isopropylmalate dehydratase
O14289	LEU2_SCHPO	736.86	2	SPsVASPKTLYDK	0.016		1	14	22.6	0.016	82783.7	3-isopropylmalate dehydratase
O14291	YF15_SCHPO	766.659	3	SSsPPAIHSDEDPSYSDSIAR	0		211	231	40	9.1e-05	34709.6	Uncharacterized protein C9E9.05
O14293	YF19_SCHPO	566.267	2	VAFTGsTGVGR	0.013		243	253	29.5	1e-05	54768.8	Putative aldehyde dehydrogenase-like protein C9E9.09c
O14293	YF19_SCHPO	681.808	2	AVHINLGmDsPI	NA		492	503	22.1	0.0036	54768.8	Putative aldehyde dehydrogenase-like protein C9E9.09c
O14295	PLR1_SCHPO	591.792	2	TKsNLNALNK	0.057	TKsNLNALNK	290	299	41.2	3.3e-08	36814.9	Pyridoxal reductase
O14295	PLR1_SCHPO	508.226	2	sLSPEQFK	0.011		300	307	23.2	0.00088	36814.9	Pyridoxal reductase
O14299	WIS4_SCHPO	754.355	3	SENFVSHIPLTPSHsGQSEK	0.018		61	80	44.8	5.1e-07	160540	MAP kinase kinase kinase wis4
O14299	WIS4_SCHPO	591.262	3	NSsFNHQHYSTTLR	0.019		109	122	31.3	3.5e-06	160540	MAP kinase kinase kinase wis4
O14299	WIS4_SCHPO	780.999	3	SENFVSHIPLtPSHsGQSEK			61	80	27.7	0.00011	160540	MAP kinase kinase kinase wis4
O14299	WIS4_SCHPO	876.384	3	qGFAsPHQSLmDNLVDSTESTKR	0		38	60	32.1	0.0013	160540	MAP kinase kinase kinase wis4
O14301	YE85_SCHPO	666.626	3	FSPsGYYVASGDNQGNVR	0.005		66	83	36.6	4.4e-05	65267	Uncharacterized WD repeat-containing protein C9G1.05
O14306	O14306_SCHPO	630.261	2	QVSSTIGSStGR	0.011		72	83	22.9	0.003	131276	Inositol polyphosphate phosphatase
O14310	NP106_SCHPO	796.899	2	EVGSNLPIPTGsLTK	0.025	EVGSNLPIPTGSLtK	208	222	28.5	0.0007	105715	Nucleoporin npp106
O14317	O14317_SCHPO	762.596	3	EEAKEEEEsDEDMGFGLFD	NA		92	110	23.3	0.001	11114.3	Ribosomal protein rpa6
O14317	O14317_SCHPO	914.801	2	EEEEsDEDMGFGLFD	NA		96	110	19.3	0.0021	11114.3	Ribosomal protein rpa6
O14317	O14317_SCHPO	922.808	2	EEEEsDEDmGFGLFD	NA		96	110	15	0.012	11114.3	Ribosomal protein rpa6
O14317	O14317_SCHPO	767.934	3	EEAKEEEEsDEDmGFGLFD	NA		92	110	16.8	0.013	11114.3	Ribosomal protein rpa6
O14319	CUE5_SCHPO	745.651	3	StAATLESAYEERPPsLPR			199	217	42.6	5.5e-09	63726.3	CUE domain-containing protein 5
O14319	CUE5_SCHPO	610.742	2	LESSSsPMmR	0.002		249	258	36.1	1.8e-06	63726.3	CUE domain-containing protein 5
O14319	CUE5_SCHPO	719.012	3	STAATLESAYEERPPsLPR	0.024	STAATLESAYEERPPsLPR	199	217	35.6	7.1e-05	63726.3	CUE domain-containing protein 5
O14319	CUE5_SCHPO	771.038	3	RSTAATLESAYEERPPsLPR	0.024	RSTAATLESAYEERPPsLPR	198	217	30.1	9.4e-05	63726.3	CUE domain-containing protein 5
O14319	CUE5_SCHPO	691.641	3	DSTsVEAEKTETDEPAVGK	0.011		370	388	38.8	0.00012	63726.3	CUE domain-containing protein 5
O14319	CUE5_SCHPO	602.746	2	LESSSsPMMR	0.004		249	258	32.9	0.00019	63726.3	CUE domain-containing protein 5
O14319	CUE5_SCHPO	406.689	2	IYPsPR	0.238	IYPsPR	192	197	22.5	0.0073	63726.3	CUE domain-containing protein 5
O14319	CUE5_SCHPO	610.736	2	LEsSSSPmMR	0.026	LESSSsPmMR	249	258	18.8	0.0089	63726.3	CUE domain-containing protein 5
O14321	ERG6_SCHPO	910.941	2	Acetyl-SStALLPPNTDQVLSR	0.011		1	17	42.9	1.2e-06	42867.7	Sterol 24-C-methyltransferase
O14325	YB7A_SCHPO	706.842	2	SITSLWSsPNLK	0.066	SITSLWSsPNLK	113	124	40.4	3.9e-05	86179.9	Uncharacterized AAA domain-containing protein C16E9.10c
O14327	PAB2_SCHPO	686.274	2	Acetyl-sDQDALDTQEK	0.246	MsDQDALDTQEK	1	12	37.1	3.4e-06	18460.9	Polyadenylate-binding protein 2
O14327	PAB2_SCHPO	710.984	3	Acetyl-sDQDALDTQEKELLEmK	0.066	MsDQDALDTQEKELLEmK	1	18	35.6	3.7e-05	18460.9	Polyadenylate-binding protein 2
O14328	KSP1_SCHPO	711.327	2	sPASLAPVNNSER	0.083	sPASLAPVNNSER	357	369	45.2	2.9e-08	53522.7	Serine/threonine-protein kinase ksp1
O14328	KSP1_SCHPO	656.634	3	LPALSDVDENISTSSsPR	0.019		339	356	41.1	1.6e-06	53522.7	Serine/threonine-protein kinase ksp1
O14328	KSP1_SCHPO	639.943	3	SYDsGLGESLNNmHIGK	0.028	SYDsGLGESLNNmHIGK	370	386	35.8	7.3e-06	53522.7	Serine/threonine-protein kinase ksp1
O14335	SCR1_SCHPO	896.432	2	SSGVNLmPLSNAPsPPK	0.05	SSGVNLmPLSNAPsPPK	252	268	44.5	7.6e-08	59713.8	DNA-binding protein scr1
O14335	SCR1_SCHPO	722.664	3	SFsPTPDVTPLVTPAHsPR			408	426	33.7	5.4e-06	59713.8	DNA-binding protein scr1
O14335	SCR1_SCHPO	632.289	3	VSVsNLLAGSPPSPSSSTK	0		523	541	25.3	0.022	59713.8	DNA-binding protein scr1
O14338	YB33_SCHPO	713.853	2	LLSGsPSSSSSPLK	0.026	LLSGsPSSSSSPLK	259	272	56.3	7.8e-08	98568.7	Uncharacterized serine-rich protein C2F12.03c
O14338	YB33_SCHPO	518.936	3	LLSGsPSSSSSPLKK	0.015		259	273	29.8	0.00045	98568.7	Uncharacterized serine-rich protein C2F12.03c
O14338	YB33_SCHPO	593.933	3	STPNSTSFsSPPTPHR	0.005		698	713	24	0.0082	98568.7	Uncharacterized serine-rich protein C2F12.03c
O14339	RL17A_SCHPO	573.756	2	YSAsPALETK	0.068	YSAsPALETK	4	13	43.9	1.6e-08	20814.2	60S ribosomal protein L17-A
O14340	YB35_SCHPO	736.324	2	EASIPDNASTAStK	0.003		860	873	52	6.4e-07	148476	Oxysterol-binding protein homolog C2F12.05c
O14340	YB35_SCHPO	798.991	3	FTQsNASGNSGWDDNESDIDR	0.01		378	398	40.7	5.9e-06	148476	Oxysterol-binding protein homolog C2F12.05c
O14340	YB35_SCHPO	770.341	2	qEsLPSQQTTETK	0.157	qEsLPSQQTTETK	757	769	40.5	7.8e-06	148476	Oxysterol-binding protein homolog C2F12.05c
O14340	YB35_SCHPO	825.638	3	FTQsNASGNSGWDDNEsDIDR			378	398	41.5	1.7e-05	148476	Oxysterol-binding protein homolog C2F12.05c
O14340	YB35_SCHPO	468.979	4	KEsIPSKQPTEGQHAR	0.036	KEsIPSKQPTEGQHAR	677	692	32.2	6.5e-05	148476	Oxysterol-binding protein homolog C2F12.05c
O14340	YB35_SCHPO	593.278	3	EPsFSSEHKPQPSLK	0.003		595	609	27	0.00035	148476	Oxysterol-binding protein homolog C2F12.05c
O14340	YB35_SCHPO	607.309	3	KEsIPSKQPSGGQQLR	0.039	KEsIPSKQPSGGQQLR	773	788	29	0.00057	148476	Oxysterol-binding protein homolog C2F12.05c
O14340	YB35_SCHPO	632.3	3	SVSSELTHASKPsLDEK	0.014		888	904	26.8	0.00078	148476	Oxysterol-binding protein homolog C2F12.05c
O14340	YB35_SCHPO	658.956	3	SVSSELTHAsKPsLDEK			888	904	27.4	0.0018	148476	Oxysterol-binding protein homolog C2F12.05c
O14356	TOR1_SCHPO	684.318	3	sSFGASTTLRPTSSSVEEK	0		2234	2252	28.9	0.0011	266186	Phosphatidylinositol 3-kinase tor1
O14360	YB4F_SCHPO	617.632	3	IADEIAEVTHsNSSIGK	0.009		166	182	35.9	0.00024	57639.9	Uncharacterized protein C30D10.15
O14368	HSP16_SCHPO	709.684	3	LNNQIPGELsPSIDVHEGK	0.034	LNNQIPGELsPSIDVHEGK	27	45	40.6	6.9e-06	15968	Heat shock protein 16
O14369	SCE3_SCHPO	759.354	3	SsSNVNTEATPSATTTTSSKPK	0		250	271	47	1.3e-08	42513.9	Probable RNA-binding protein sce3
O14369	SCE3_SCHPO	732.312	3	AtPSSADAGYNAPSSTFESVR	0.023	ATPSSADAGyNAPSSTFESVR	46	66	39.1	8.2e-06	42513.9	Probable RNA-binding protein sce3
O14369	SCE3_SCHPO	950.086	3	ATPSSADAGYNAPSSTFEsVRSPPESR	0.001		46	72	24.6	0.0025	42513.9	Probable RNA-binding protein sce3
O14369	SCE3_SCHPO	759.358	3	SSSNVNTEATPSAtTTTSSKPK	0.001		250	271	21.6	0.011	42513.9	Probable RNA-binding protein sce3
O14369	SCE3_SCHPO	577.284	3	RGPLPPAEPAEsPFGK	NA		186	201	23.4	0.048	42513.9	Probable RNA-binding protein sce3
O14390	O14390_SCHPO	425.531	3	EQQIPsTVHR	0.011		14	23	22.2	0.0031	6970.2	40S ribosomal protein S20 homolog
O14460	EF2_SCHPO	586.278	2	StLTDSLVQK	0.002		33	42	24.7	0.00039	93231.7	Elongation factor 2
O14469	RS22_SCHPO	525.467	4	HGYIDEFTEIDDHRsGK	0.121	HGYIDEFTEIDDHRsGK	44	60	41.9	1.1e-07	14760.4	40S ribosomal protein S22
O14469	RS22_SCHPO	626.838	2	QVGVIVLTTsR	0.009		98	108	40.6	2.2e-07	14760.4	40S ribosomal protein S22
O36019	ATG13_SCHPO	470.212	2	sATSAGLPR	0.028	sATSAGLPR	648	656	28	2.9e-05	83710.5	Autophagy protein 13
O36025	O36025_SCHPO	925.394	2	DCFPSSNSITTGTAsPK			161	177	74.8	5e-14	106143	GYF domain
O36025	O36025_SCHPO	855.064	3	NPTVSSTTSSANPAIVSNGGsPFYK	0.044	NPTVSSTTSSANPAIVSNGGsPFYK	93	117	52.8	9.5e-11	106143	GYF domain
O36025	O36025_SCHPO	936.42	2	sQSELGNSSGAWSQVVR	0.011		951	967	48.1	1.6e-08	106143	GYF domain
O36025	O36025_SCHPO	705.33	2	DTDsPLNILVDK	0.042	DTDsPLNILVDK	317	328	49.1	3.5e-08	106143	GYF domain
O36025	O36025_SCHPO	612.768	2	qQSSVTTAsPR	0.03	qQSSVTTAsPR	767	777	43.2	7.2e-08	106143	GYF domain
O36025	O36025_SCHPO	819.383	2	IVNQQsPSAQQTTR	0.156	IVNQQsPSAQQTTR	824	837	51.5	1e-07	106143	GYF domain
O36025	O36025_SCHPO	531.715	2	SPSsFSQSR	0.027	SPSsFSQSR	193	201	43.4	2.8e-07	106143	GYF domain
O36025	O36025_SCHPO	494.579	3	LSTGVQKQsPAASK	0.049	LSTGVQKQsPAASK	596	609	46.9	3.6e-07	106143	GYF domain
O36025	O36025_SCHPO	605.642	3	LGsPFNHINRPVLDR	NA		178	192	32.5	1.4e-06	106143	GYF domain
O36025	O36025_SCHPO	857.889	2	EmSIAsSEALPQVEK	0.005		645	659	41.6	3.8e-06	106143	GYF domain
O36025	O36025_SCHPO	655.937	3	ANsLSEISYNQQSECR	0.003		507	522	37.4	1.1e-05	106143	GYF domain
O36025	O36025_SCHPO	647.642	3	ENtPIHHNESLNQLSK	0.158	ENtPIHHNESLNQLSK	553	568	35.9	2.2e-05	106143	GYF domain
O36025	O36025_SCHPO	849.888	2	EMSIAsSEALPQVEK	0.018		645	659	38.6	5.2e-05	106143	GYF domain
O36025	O36025_SCHPO	804.371	2	SNSDQPPVAIPSTsK	0.008		660	674	40	0.00016	106143	GYF domain
O36025	O36025_SCHPO	647.639	3	ENTPIHHNEsLNQLSK	0.046	ENTPIHHNEsLNQLSK	553	568	32.8	0.00021	106143	GYF domain
O36025	O36025_SCHPO	805.7	3	SNSDQPPVAIPSTsKTGsPWAK			660	681	32.8	0.00027	106143	GYF domain
O36025	O36025_SCHPO	805.698	3	SNSDQPPVAIPSTSKtGsPWAK			660	681	28.3	0.00033	106143	GYF domain
O36025	O36025_SCHPO	855.065	3	NPTVSSTtSSANPAIVSNGGSPFYK	0.028	NPTVSSTTSSANPAIVsNGGSPFYK	93	117	27.7	0.0021	106143	GYF domain
O36025	O36025_SCHPO	546.621	3	RLStGVQKQSPAASK	0.065	RLSTGVQKQsPAASK	595	609	22.4	0.0029	106143	GYF domain
O36025	O36025_SCHPO	674.311	2	HLPsLDETISR	0.032	HLPsLDETISR	634	644	21.6	0.0049	106143	GYF domain
O36025	O36025_SCHPO	929.155	4	EESALGTsDNSDmYEKENTPIHHNESLNQLSK	0.014		537	568	22.6	0.0053	106143	GYF domain
O36025	O36025_SCHPO	779.04	3	SNSDQPPVAIPSTSKtGSPWAK	0		660	681	27.5	0.0054	106143	GYF domain
O36025	O36025_SCHPO	697.679	3	EIPVTSGSQTTAPKPsPWK	0.028	EIPVTSGSQTTAPKPsPWK	610	628	24.4	0.0054	106143	GYF domain
O36027	WSP1_SCHPO	665.83	2	SAPALPPLGNAsR	0.211	SAPALPPLGNAsR	399	411	28.2	0.00035	59606.1	Wiskott-Aldrich syndrome protein homolog 1
O42643	PRP22_SCHPO	532.806	2	VSLKLsPIK	0.112	VSLKLsPIK	397	405	49.1	2.1e-07	131494	Pre-mRNA-splicing factor ATP-dependent RNA helicase prp22
O42643	PRP22_SCHPO	441.191	3	SIsPSFSHHSR	0.058	SIsPSFSHHSR	173	183	34.7	0.00011	131494	Pre-mRNA-splicing factor ATP-dependent RNA helicase prp22
O42648	O42648_SCHPO	706.324	2	SEPsPPPPPEGIK	0.078	SEPsPPPPPEGIK	79	91	27.8	0.0012	38244.1	HMG box protein
O42652	AATC_SCHPO	733.302	2	Acetyl-sDYGFANIEEAK	0.017		1	13	42.2	1.5e-06	46140.8	Aspartate aminotransferase, cytoplasmic
O42652	AATC_SCHPO	752.273	2	sDyGFANIEEAK			1	13	24.3	0.0064	46140.8	Aspartate aminotransferase, cytoplasmic
O42657	O42657_SCHPO	780.367	3	NDVPEVsRPSTDTIGVSSALSK	0.002		194	215	36.9	1.5e-06	87265.6	GRIP domain protein
O42668	TPR1_SCHPO	673.652	3	LVSVEHPPYsPTSIEQR	0.001		825	841	32.1	2.9e-05	119152	Tetratricopeptide repeat protein 1
O42700	TAL1_SCHPO	528.604	3	KLDASKAsSLNLEK	0.003		261	274	48.8	2.3e-06	35238.5	Transaldolase
O42700	TAL1_SCHPO	471.218	2	AsSLNLEK	0.046	AsSLNLEK	267	274	21.1	0.0054	35238.5	Transaldolase
O42709	MCM10_SCHPO	499.253	2	VLTVSsPSK	0.01		59	67	40.1	4.9e-05	66634	DNA replication licensing factor mcm10
O42844	KCC2_SCHPO	632.309	2	GEIDIPTtPIK	0.013		386	396	28.1	0.0017	56609.8	Calcium/calmodulin-dependent protein kinase type II
O42851	YFHE_SCHPO	741.821	2	Acetyl-THTPsFDLSDIK	0.047	MTHTPsFDLSDIK	1	13	30.9	7.4e-05	43284.7	Uncharacterized trans-sulfuration enzyme C23A1.14c
O42851	YFHE_SCHPO	741.826	2	Acetyl-THtPSFDLSDIK	0.01		1	13	32	0.00021	43284.7	Uncharacterized trans-sulfuration enzyme C23A1.14c
O42854	YFHH_SCHPO	899.856	2	TPsGEFGDNEFmFPK	0.034	TPsGEFGDNEFmFPK	775	789	49.3	2.5e-12	170529	SH3 domain-containing protein C23A1.17
O42854	YFHH_SCHPO	760.891	2	VLsPPPIITNFDK	0.249	VLsPPPIITNFDK	595	607	51.4	5.9e-09	170529	SH3 domain-containing protein C23A1.17
O42854	YFHH_SCHPO	891.851	2	TPsGEFGDNEFMFPK	0.037	TPsGEFGDNEFMFPK	775	789	40	1.1e-08	170529	SH3 domain-containing protein C23A1.17
O42854	YFHH_SCHPO	850.048	3	SSVPsPHSNASPSPTSSSMASAAPAR	0.005		1254	1279	48.3	2.5e-07	170529	SH3 domain-containing protein C23A1.17
O42854	YFHH_SCHPO	855.381	3	SsVPSPHSNASPSPTSSSmASAAPAR	0		1254	1279	45.9	7.3e-07	170529	SH3 domain-containing protein C23A1.17
O42854	YFHH_SCHPO	429.176	3	TWHsPDFTSK	0.078	TWHsPDFTSK	689	698	41.4	8.7e-07	170529	SH3 domain-containing protein C23A1.17
O42854	YFHH_SCHPO	786.008	3	DSSSTSTQPTEQSNAQQAPsPK	0.175	DSSSTSTQPTEQSNAQQAPsPK	482	503	49.8	1.5e-06	170529	SH3 domain-containing protein C23A1.17
O42854	YFHH_SCHPO	673.315	2	NSsLGYAPSITR	0.012		92	103	34.5	3.4e-06	170529	SH3 domain-containing protein C23A1.17
O42854	YFHH_SCHPO	538.289	2	IFsPPPLPK	NA		766	774	34.1	2.3e-05	170529	SH3 domain-containing protein C23A1.17
O42854	YFHH_SCHPO	497.571	3	GHQsRPSTGSQLR	0.062	GHQsRPSTGSQLR	796	808	28.2	0.00012	170529	SH3 domain-containing protein C23A1.17
O42854	YFHH_SCHPO	662.908	3	APPVPAPssEAPSVStPR			1236	1253	18.1	0.013	170529	SH3 domain-containing protein C23A1.17
O42854	YFHH_SCHPO	926.167	4	DFtEPAEDAVFVERASEmALHQPTPtSAVHSR			60	91	24.9	0.031	170529	SH3 domain-containing protein C23A1.17
O42869	O42869_SCHPO	751.004	3	HDLYSSANASsASLHPTEQR	0.007		145	164	38.5	8.7e-07	73873.1	GTPase activating protein
O42869	O42869_SCHPO	473.537	3	THtDSPTSLSHR	0.01		178	189	27.7	6.3e-05	73873.1	GTPase activating protein
O42869	O42869_SCHPO	737.835	2	TTSsPTIPSYANR	0		165	177	32.1	0.00053	73873.1	GTPase activating protein
O42869	O42869_SCHPO	540.715	2	AKsISDAtK			256	264	21	0.014	73873.1	GTPase activating protein
O42881	O42881_SCHPO	515.24	2	FTQTVIGsP	0.048	FTQTVIGsP	216	224	28.8	5.3e-05	24474.6	Phospholipase
O42882	O42882_SCHPO	751.677	3	Acetyl-AsPPILsRESPVLGLEEEK			1	20	46.1	1.2e-07	38200.5	Conserved fungal protein
O42882	O42882_SCHPO	655.301	2	EsPVLGLEEEK	NA		10	20	31.9	8e-06	38200.5	Conserved fungal protein
O42882	O42882_SCHPO	767.721	3	Acetyl-ASPPILSREsPVLGLEEEKK	0.023	MASPPILSREsPVLGLEEEKK	1	21	33.9	1.7e-05	38200.5	Conserved fungal protein
O42882	O42882_SCHPO	794.377	3	Acetyl-AsPPILSREsPVLGLEEEKK			1	21	37.4	9.4e-05	38200.5	Conserved fungal protein
O42882	O42882_SCHPO	481.738	2	Acetyl-AsPPILSR	0.208	MAsPPILSR	1	9	23	0.0066	38200.5	Conserved fungal protein
O42890	AMO_SCHPO	771.598	4	HNPALDTSSSVNSTSEATsPNTHHENLR	0		631	658	38.5	0.00072	90127.5	Putative copper amine oxidase
O42893	TREA_SCHPO	660.311	2	VVSLGSAsSGGYR	0.016		113	125	34.8	1.4e-06	84603.9	Neutral trehalase
O42893	TREA_SCHPO	603.277	3	EESLPAFENLsIHKN	0.202	EESLPAFENLsIHKN	721	735	31.4	5.9e-06	84603.9	Neutral trehalase
O42900	PPK19_SCHPO	573.748	2	sYNDDLIAR	0.016		957	965	33.1	0.00063	191096	Serine/threonine-protein kinase ppk19
O42909	O42909_SCHPO	661.778	2	Acetyl-SsETKSEFGTK	0		1	12	35.6	1.3e-05	38187.1	Mitochondrial peptidase
O42913	O42913_SCHPO	496.243	2	SVsLLQHK	0.041	SVsLLQHK	264	271	26.3	1.7e-06	38328.5	Negative regulator of MBF
O42914	YBI8_SCHPO	950.389	4	GWGDLVNSAANPDVAENEGNtPSGAQtPAAEEENVK			140	175	54.2	9.4e-08	30949.5	Uncharacterized protein C16A3.08c
O42914	YBI8_SCHPO	950.396	4	GWGDLVNSAANPDVAENEGNTPsGAQtPAAEEENVK			140	175	52.1	2.2e-07	30949.5	Uncharacterized protein C16A3.08c
O42914	YBI8_SCHPO	930.398	4	GWGDLVNSAANPDVAENEGNTPSGAQtPAAEEENVK	0.001		140	175	50.9	3.8e-07	30949.5	Uncharacterized protein C16A3.08c
O42914	YBI8_SCHPO	438.185	3	EFDRHSQtGR	0.048	EFDRHsQTGR	121	130	29.5	2.7e-06	30949.5	Uncharacterized protein C16A3.08c
O42914	YBI8_SCHPO	930.406	4	GWGDLVNSAANPDVAENEGNtPSGAQTPAAEEENVK	0.024	GWGDLVNSAANPDVAENEGNTPsGAQTPAAEEENVK	140	175	45.5	5e-06	30949.5	Uncharacterized protein C16A3.08c
O42914	YBI8_SCHPO	545.752	2	RSDsPPVPR	0.027	RSDsPPVPR	34	42	39.7	2.5e-05	30949.5	Uncharacterized protein C16A3.08c
O42914	YBI8_SCHPO	467.7	2	SDsPPVPR	0.01		35	42	24.6	0.00021	30949.5	Uncharacterized protein C16A3.08c
O42922	O42922_SCHPO	609.296	3	TNAAEGQNSIDGLsLKK	0.001		15	31	30.8	9.6e-05	65297.3	Membrane transporter
O42922	O42922_SCHPO	849.394	2	TNAAEGQNsIDGLSLK	0.052	TNAAEGQNsIDGLSLK	15	30	31.4	0.00096	65297.3	Membrane transporter
O42922	O42922_SCHPO	669.313	3	KTTsPFILTAYPSNEEK	0.007		31	47	28.5	0.0022	65297.3	Membrane transporter
O42923	CIP1_SCHPO	614.796	2	IYGNEsPLQK			451	460	54.9	1.6e-08	53477.9	RNA-binding post-transcriptional regulator cip1
O42923	CIP1_SCHPO	833.392	2	NTSVSQSQPAsPNLR	0.119	NTSVSQSQPAsPNLR	391	405	53.2	4.2e-08	53477.9	RNA-binding post-transcriptional regulator cip1
O42923	CIP1_SCHPO	572.247	2	LQsPLNsPK			35	43	37.1	3.4e-07	53477.9	RNA-binding post-transcriptional regulator cip1
O42923	CIP1_SCHPO	609.778	2	ASTLSsPFNSK	0.022	ASTLSsPFNSK	461	471	51	6.1e-07	53477.9	RNA-binding post-transcriptional regulator cip1
O42923	CIP1_SCHPO	873.366	2	NTSVsQSQPAsPNLR			391	405	42.9	7.2e-07	53477.9	RNA-binding post-transcriptional regulator cip1
O42923	CIP1_SCHPO	992.089	3	NSNSANEAsAMAFHNVSPPSGAESSSESK	0.048	NSNSANEASAMAFHNVsPPSGAESSSESK	125	153	40.4	2.3e-06	53477.9	RNA-binding post-transcriptional regulator cip1
O42923	CIP1_SCHPO	617.303	2	LQPIGsPQASR	0.108	LQPIGsPQASR	44	54	42	2.4e-06	53477.9	RNA-binding post-transcriptional regulator cip1
O42923	CIP1_SCHPO	532.261	2	LQsPLNSPK	0.184	LQsPLNSPK	35	43	40.1	9.8e-06	53477.9	RNA-binding post-transcriptional regulator cip1
O42923	CIP1_SCHPO	997.412	3	NSNSANEAsAmAFHNVSPPSGAESSSESK	0.007		125	153	40	1.2e-05	53477.9	RNA-binding post-transcriptional regulator cip1
O42923	CIP1_SCHPO	879.097	3	AGSTANSNStPVEPGEDTIPTAIVVK	0		182	207	38.1	1.4e-05	53477.9	RNA-binding post-transcriptional regulator cip1
O42923	CIP1_SCHPO	596.272	3	SIDDKIYGNEsPLQK	0.029	SIDDKIyGNESPLQK	446	460	38.5	2e-05	53477.9	RNA-binding post-transcriptional regulator cip1
O42923	CIP1_SCHPO	879.083	3	AGStANSNSTPVEPGEDTIPTAIVVK	0.002		182	207	37.5	3e-05	53477.9	RNA-binding post-transcriptional regulator cip1
O42923	CIP1_SCHPO	532.264	2	LQSPLNsPK	0.184	LQSPLNsPK	35	43	41.2	4.1e-05	53477.9	RNA-binding post-transcriptional regulator cip1
O42923	CIP1_SCHPO	617.303	2	LQPIGSPQAsR	0.034	LQPIGsPQASR	44	54	32.2	0.00019	53477.9	RNA-binding post-transcriptional regulator cip1
O42924	EAF7_SCHPO	779.324	2	SIsPVTEQPQsPK			191	203	36.9	2.8e-07	30901.5	Probable chromatin modification-related protein eaf7
O42926	VP13B_SCHPO	985.476	3	KLESPDDVQsLQAESSVSTPAVTAASEK	0.024	KLESPDDVQsLQAESSVSTPAVTAASEK	1422	1449	49.2	9.5e-09	354028	Vacuolar protein sorting-associated protein 13b
O42931	PRS7_SCHPO	684.312	2	MsEEQPLQVAR	NA		89	99	29.3	0.00087	48965.5	26S protease regulatory subunit 7 homolog
O42931	PRS7_SCHPO	551.256	3	QRMsEEQPLQVAR	NA		87	99	28.1	0.0075	48965.5	26S protease regulatory subunit 7 homolog
O42935	RL32B_SCHPO	477.706	2	HQsDLFK	NA		17	23	24.8	0.00028	14445.1	60S ribosomal protein L32-B
O42938	K6PF_SCHPO	817.029	3	SEEsGAASNLESGLAtPVVETLK			160	182	61.3	2.7e-10	102556	6-phosphofructokinase
O42938	K6PF_SCHPO	790.378	3	SEESGAASNLESGLAtPVVETLK	0.074	SEESGAASNLESGLAtPVVETLK	160	182	56.4	4.9e-10	102556	6-phosphofructokinase
O42938	K6PF_SCHPO	817.019	3	SEESGAAsNLESGLAtPVVETLK			160	182	57.4	9e-10	102556	6-phosphofructokinase
O42938	K6PF_SCHPO	859.728	3	KSEESGAAsNLESGLAtPVVETLK			159	182	55.7	4.8e-09	102556	6-phosphofructokinase
O42938	K6PF_SCHPO	859.731	3	SEESGAAsNLESGLAtPVVETLKK			160	183	44.3	7.4e-09	102556	6-phosphofructokinase
O42938	K6PF_SCHPO	859.739	3	SEEsGAASNLESGLAtPVVETLKK			160	183	46.7	1.1e-08	102556	6-phosphofructokinase
O42938	K6PF_SCHPO	833.061	3	SEESGAASNLESGLAtPVVETLKK	0.021	SEESGAASNLESGLAtPVVETLKK	160	183	54.4	2e-08	102556	6-phosphofructokinase
O42938	K6PF_SCHPO	859.721	3	KSEEsGAASNLESGLAtPVVETLK			159	182	63.5	2.6e-08	102556	6-phosphofructokinase
O42938	K6PF_SCHPO	859.721	3	KSEESGAASNLEsGLAtPVVETLK			159	182	54.6	4.5e-08	102556	6-phosphofructokinase
O42938	K6PF_SCHPO	902.428	3	KSEESGAASNLEsGLAtPVVETLKK			159	183	56	5.3e-08	102556	6-phosphofructokinase
O42938	K6PF_SCHPO	833.075	3	KSEESGAASNLESGLAtPVVETLK	0.101	KSEESGAASNLESGLAtPVVETLK	159	182	50.3	6.5e-08	102556	6-phosphofructokinase
O42938	K6PF_SCHPO	859.731	3	SEESGAAsNLEsGLATPVVETLKK			160	183	42.1	6.7e-08	102556	6-phosphofructokinase
O42938	K6PF_SCHPO	817.029	3	SEESGAASNLEsGLAtPVVETLK			160	182	47.3	6.7e-08	102556	6-phosphofructokinase
O42938	K6PF_SCHPO	790.378	3	SEESGAASNLEsGLATPVVETLK	0.035	SEESGAASNLEsGLATPVVETLK	160	182	49.5	2e-07	102556	6-phosphofructokinase
O42938	K6PF_SCHPO	790.365	3	SEESGAASNLESGLATPVVEtLK	0.067	SEESGAASNLESGLAtPVVETLK	160	182	50.2	2.4e-07	102556	6-phosphofructokinase
O42938	K6PF_SCHPO	833.077	3	KSEESGAAsNLESGLATPVVETLK	0.012		159	182	50.5	3.5e-07	102556	6-phosphofructokinase
O42938	K6PF_SCHPO	790.376	3	SEESGAAsNLESGLATPVVETLK	0.002		160	182	47.4	5.3e-07	102556	6-phosphofructokinase
O42938	K6PF_SCHPO	817.028	3	SEEsGAAsNLESGLATPVVETLK			160	182	39.4	1.1e-06	102556	6-phosphofructokinase
O42938	K6PF_SCHPO	679.305	3	LVPGELSLsPAAEDSEWR	0.006		77	94	42.6	3.5e-06	102556	6-phosphofructokinase
O42938	K6PF_SCHPO	833.065	3	KSEESGAASNLEsGLATPVVETLK	0.094	KSEESGAASNLEsGLATPVVETLK	159	182	43.5	1.1e-05	102556	6-phosphofructokinase
O42938	K6PF_SCHPO	843.725	3	sEESGAASNLEsGLAtPVVETLK			160	182	37.3	4.5e-05	102556	6-phosphofructokinase
O42938	K6PF_SCHPO	859.732	3	KsEESGAAsNLESGLATPVVETLK			159	182	33	8e-05	102556	6-phosphofructokinase
O42938	K6PF_SCHPO	833.071	3	SEEsGAASNLESGLATPVVETLKK	0.004		160	183	34.8	0.00013	102556	6-phosphofructokinase
O42938	K6PF_SCHPO	902.427	3	KSEEsGAASNLEsGLATPVVETLKK			159	183	38.5	0.00024	102556	6-phosphofructokinase
O42939	UBA2_SCHPO	480.556	3	RPsNDTLTQEAK	0.05	RPsNDTLTQEAK	607	618	32.8	0.00053	70614.9	Ubiquitin-activating enzyme E1-like
O42939	UBA2_SCHPO	532.585	3	RRPsNDTLTQEAK	0.044	RRPsNDTLTQEAK	606	618	32.7	0.00057	70614.9	Ubiquitin-activating enzyme E1-like
O42943	YBP8_SCHPO	844.861	2	DLsELSTSDPIFER	0.125	DLsELSTSDPIFER	48	61	39.2	2e-06	69213.5	Uncharacterized ABC transporter ATP-binding protein C16H5.08c
O42943	YBP8_SCHPO	844.873	2	DLSELSTsDPIFER	0.006		48	61	45.6	3.1e-06	69213.5	Uncharacterized ABC transporter ATP-binding protein C16H5.08c
O42943	YBP8_SCHPO	844.871	2	DLSELsTSDPIFER	0.013		48	61	46.1	6.7e-06	69213.5	Uncharacterized ABC transporter ATP-binding protein C16H5.08c
O42947	O42947_SCHPO	787.328	4	EATAtPTEEEQIEGYDQEHTDELGMSR	0.005		397	423	50.3	1.8e-09	76737.1	Conserved fungal protein
O42954	MBX1_SCHPO	657.316	2	SFTAsPNQILR	0.011		347	357	33.1	9.6e-05	48394.8	MADS-box transcription factor 1
O42973	O42973_SCHPO	826.312	3	DPDsDFDSDNVDEYIDDHKR	0.032	DPDsDFDSDNVDEYIDDHKR	390	409	35.2	7.3e-06	50043.7	Conserved eukaryotic protein
O42975	O42975_SCHPO	519.223	2	GDELILsPN	NA		964	972	27.6	1.5e-05	113250	DuF1740 family protein
O42976	O42976_SCHPO	671.304	3	DGRQsPSKEAPFGEGELK	0.011		76	93	28	0.0039	85355.2	GRAM domain protein
O42979	O42979_SCHPO	953.939	2	qEATESDQIPLsPTSLK	0.065	qEATESDQIPLsPTSLK	50	66	38.8	4.5e-05	27936.8	Cyclin pho85 family
O42979	O42979_SCHPO	962.453	2	QEATESDQIPLSPtSLK	0.073	QEATESDQIPLsPTSLK	50	66	38.9	7.6e-05	27936.8	Cyclin pho85 family
O42979	O42979_SCHPO	447.202	2	LLSSHsIG	0.058	LLSSHsIG	236	243	20	0.022	27936.8	Cyclin pho85 family
O42980	NEP1_SCHPO	439.532	3	IQDHVPsPSEK	0.042	IQDHVPsPSEK	334	344	36	5.8e-05	47258.2	NEDD8-specific protease 1
O42980	NEP1_SCHPO	639.571	4	VPsPSNNKEDHLPLLSDEKLDK	0.019		349	370	31.7	0.00012	47258.2	NEDD8-specific protease 1
O43017	SWD3_SCHPO	498.686	2	HEKDGFsP	NA		373	380	23.5	0.0002	42980.6	Set1 complex component swd3
O43024	O43024_SCHPO	736.566	4	NQYSQYDNVAGsASNTPDVHSVMHNK	0.018		692	717	28.8	0.00025	100135	RNAPII degradation factor
O43024	O43024_SCHPO	815.143	4	AGAPsDPSSVHAPSSLEKPAGTGDLPSSEISTK	0.002		177	209	22	0.0073	100135	RNAPII degradation factor
O43026	G3P2_SCHPO	774.897	2	VPtPDVSVVDLTVK	0.138	VPtPDVSVVDLTVK	235	248	50.7	1.9e-08	35674.9	Glyceraldehyde-3-phosphate dehydrogenase 2
O43026	G3P2_SCHPO	712.843	2	GAsANIIPSSTGAAK	0.28	GAsANIIPSSTGAAK	201	215	39.2	6.1e-07	35674.9	Glyceraldehyde-3-phosphate dehydrogenase 2
O43026	G3P2_SCHPO	633.96	3	VISNASCtTNCLAPLAK	0.015		146	162	40.2	1.8e-05	35674.9	Glyceraldehyde-3-phosphate dehydrogenase 2
O43026	G3P2_SCHPO	712.848	2	GASANIIPSsTGAAK	0.017		201	215	31.3	0.00084	35674.9	Glyceraldehyde-3-phosphate dehydrogenase 2
O43026	G3P2_SCHPO	712.842	2	GASANIIPSStGAAK	0.021	GASANIIPsSTGAAK	201	215	28	0.0029	35674.9	Glyceraldehyde-3-phosphate dehydrogenase 2
O43026	G3P2_SCHPO	447.729	2	VIIsAPSK	0.006		119	126	22.6	0.0032	35674.9	Glyceraldehyde-3-phosphate dehydrogenase 2
O43028	VAC8_SCHPO	661.294	2	ALHLIEQDTDs	0.009		540	550	26.6	0.00063	60233.1	Vacuolar protein 8
O43035	ATG3_SCHPO	967.398	3	NKDDDQDDDAISSIHsDTSDIASAER	0.015		99	124	41.9	9.7e-07	31886	Autophagy-related protein 3
O43035	ATG3_SCHPO	967.395	3	NKDDDQDDDAISSIHSDTsDIASAER	0		99	124	37.2	3.8e-06	31886	Autophagy-related protein 3
O43035	ATG3_SCHPO	951.429	3	ELsDSGPLPLKDEEDDDQmVSPVIK	0.009		131	155	38.4	1.4e-05	31886	Autophagy-related protein 3
O43035	ATG3_SCHPO	860.368	4	ELsDSGPLPLKDEEDDDQmVSPVIKEDEGR	0.056	ELSDSGPLPLKDEEDDDQmVsPVIKEDEGR	131	160	26.8	0.0039	31886	Autophagy-related protein 3
O43040	CTF1_SCHPO	653.963	3	NmHQPASATSsPPSVPQK	0.007		288	305	32.5	0.00032	39963.2	Cleavage and termination factor 1
O43040	CTF1_SCHPO	648.628	3	NMHQPASATSsPPSVPQK	0.022	NMHQPASATSsPPSVPQK	288	305	34.2	0.00048	39963.2	Cleavage and termination factor 1
O43040	CTF1_SCHPO	653.96	3	NmHQPASATSSPPsVPQK	0.003		288	305	28.9	0.0078	39963.2	Cleavage and termination factor 1
O43042	O43042_SCHPO	711.305	2	SIsmKDYARVR	0.033	SIsmKDYARVR	14	24	23.5	0.015	37195.4	Mitochondrial ribosomal protein subunit L3
O43051	NOP14_SCHPO	629.992	4	mHFGGFEDsDAENEKEGEGAHK	NA		182	203	39.7	4.6e-06	95152.9	Probable nucleolar complex protein 14
O43051	NOP14_SCHPO	625.998	4	MHFGGFEDsDAENEKEGEGAHK	NA		182	203	29.3	0.00055	95152.9	Probable nucleolar complex protein 14
O43058	SEP1_SCHPO	610.317	2	LPSLPSsPTIK	0		424	434	30.8	1.7e-05	73032.7	Forkhead protein sep1
O43058	SEP1_SCHPO	650.308	2	LPsLPSsPTIK			424	434	31.6	1.8e-05	73032.7	Forkhead protein sep1
O43059	YGT6_SCHPO	928.747	3	StTTSPTSAVASPAPTENEDSNAAIER	0.005		461	487	51.6	2.1e-08	90758.2	FCH domain-containing protein C4C3.06
O43059	YGT6_SCHPO	955.408	3	StTTSPTSAVAsPAPTENEDSNAAIER			461	487	47.6	1.5e-07	90758.2	FCH domain-containing protein C4C3.06
O43059	YGT6_SCHPO	770.995	3	AsSISSAEEHPSNIDDSSIER	0.018		317	337	39.5	2.8e-07	90758.2	FCH domain-containing protein C4C3.06
O43059	YGT6_SCHPO	603.273	3	AsPFNKPNSVHSEASR	0.183	AsPFNKPNSVHSEASR	411	426	34.9	5.1e-06	90758.2	FCH domain-containing protein C4C3.06
O43059	YGT6_SCHPO	770.995	3	ASSISSAEEHPSNIDDsSIER	0.005		317	337	42.9	5.2e-06	90758.2	FCH domain-containing protein C4C3.06
O43059	YGT6_SCHPO	771.001	3	ASSISsAEEHPSNIDDSSIER	0.003		317	337	39.1	2.8e-05	90758.2	FCH domain-containing protein C4C3.06
O43059	YGT6_SCHPO	823.028	3	ASSISSAEEHPSNIDDSsIERR	0		317	338	31.5	0.0016	90758.2	FCH domain-containing protein C4C3.06
O43059	YGT6_SCHPO	603.273	3	ASPFNKPNsVHSEASR	0.065	ASPFNKPNsVHSEASR	411	426	30.7	0.0018	90758.2	FCH domain-containing protein C4C3.06
O43059	YGT6_SCHPO	519.721	2	QFmNSTsK	0.001		230	237	25.4	0.017	90758.2	FCH domain-containing protein C4C3.06
O43065	MOT1_SCHPO	769.687	3	SHsQEIKPIVDFGPDEETAK	0.009		142	161	44.9	8.1e-08	217634	Probable helicase mot1
O43066	PPK30_SCHPO	713.317	2	qPSsPDTVHPGIK	0.004		885	897	37	2.1e-05	105898	Serine/threonine-protein kinase ppk30
O43066	PPK30_SCHPO	711.303	2	LQQSIsTsLER			758	768	22.4	0.042	105898	Serine/threonine-protein kinase ppk30
O43066	PPK30_SCHPO	711.305	2	LQQsIStSLER			758	768	20.1	0.045	105898	Serine/threonine-protein kinase ppk30
O43068	MDE4_SCHPO	654.312	2	IPQsPSSLSPSK	0.023	IPQsPSSLSPSK	346	357	44.6	7.1e-07	47664.4	Mei4-dependent protein 4
O43073	YGW2_SCHPO	566.278	2	TLLDSsIFR	0.005		1	10	35.8	0.00011	18816.1	UPF0220 protein C8D2.02c
O43076	SHQ1_SCHPO	710.332	4	KPLIEEVEDTPsPSTSQNASKDEEK	0.033	KPLIEEVEDTPsPSTSQNASKDEEK	105	129	28.9	0.0031	52393.4	Protein shq1
O43078	SUR2_SCHPO	655.812	2	GAQsEVNLSTPK	0.212	GAQsEVNLSTPK	130	141	42.5	3.5e-07	71733.2	Protein sur2
O43078	SUR2_SCHPO	655.808	2	GAQSEVNLsTPK	0.25	GAQsEVNLSTPK	130	141	30.2	0.0032	71733.2	Protein sur2
O43082	O43082_SCHPO	820.324	3	VAAYDTGNsSDNIADEENDNHK	0.001		66	87	36.4	3.9e-05	27125.5	Ribosome biogenesis protein Rrp14-C
O43088	O43088_SCHPO	762.1	4	KHsPALSDGTTSNDGAPLEFDTTHLPEK	0.059	KHsPALSDGTTSNDGAPLEFDTTHLPEK	242	269	33.3	0.0002	50797.3	RNA polymerase II associated protein
O43088	O43088_SCHPO	963.069	5	LNsGEFREVLSPELHTLVEDAHIyELLAAAAsDQVKHLTVR			390	430	25.1	0.0065	50797.3	RNA polymerase II associated protein
O43120	UAP2_SCHPO	930.4	2	AGsTGAEVSDVTAEATEGK	0.003		46	64	48.6	1.2e-09	41964.1	Splicing factor U2AF-associated protein 2
O43120	UAP2_SCHPO	588.222	2	FADWLENsN	NA		359	367	32.1	5e-06	41964.1	Splicing factor U2AF-associated protein 2
O43125	CSH3_SCHPO	990.802	3	qSEASsVNSSTEKLPPPPSYPGPNTAHK	0		113	140	49.7	1.8e-07	31736.8	Protein csh3
O43125	CSH3_SCHPO	747.612	4	QSEASsVNSSTEKLPPPPSYPGPNTAHK	0.004		113	140	48.8	2.5e-06	31736.8	Protein csh3
O43125	CSH3_SCHPO	990.794	3	qSEASSVNSSTEKLPPPPSyPGPNTAHK	0		113	140	28.1	0.0058	31736.8	Protein csh3
O59676	YB8D_SCHPO	527.246	3	GRIsPSSPLNDQTK	0.01		246	259	24.9	0.016	40923.6	PWWP domain-containing protein C29A3.13
O59716	O59716_SCHPO	549.247	3	TESsHQATLSVYSR	0		95	108	32	0.00056	17185.9	Sjogren's syndrome/scleroderma autoantigen 1 family
O59721	PUS4_SCHPO	650.301	2	sPTTNSVTDVAK	0.022	sPTTNSVTDVAK	291	302	51.8	2.4e-10	45166.7	Probable tRNA pseudouridine synthase 4
O59721	PUS4_SCHPO	575.954	3	INAKSPTtNSVTDVAK	0.005		287	302	54.5	1.4e-08	45166.7	Probable tRNA pseudouridine synthase 4
O59721	PUS4_SCHPO	529.231	2	IDLKGDETs	0.007		399	407	26	0.002	45166.7	Probable tRNA pseudouridine synthase 4
O59732	CHR1_SCHPO	763.874	2	VTNEANASAIsLEK	0.035	VTNEANASAIsLEK	220	233	43.7	2.5e-07	49568.9	Chitin synthase regulatory factor 1
O59740	O59740_SCHPO	671.809	2	AAVTYsPSQNPK	0.018		296	307	40.1	2.5e-06	56542.5	Tea1 anchoring protein Mod5
O59746	O59746_SCHPO	765.812	2	FTENENDLsPER	0.025	FTENENDLsPER	39	50	31.8	4.8e-05	90825.2	Transcription factor
O59746	O59746_SCHPO	678.298	2	LSDsPEDPFLR	0.021	LSDsPEDPFLR	13	23	36.8	0.00016	90825.2	Transcription factor
O59753	RAD14_SCHPO	727.667	3	Acetyl-MENSSIVKsPNPTIEEQR	0.072	MENSSIVKsPNPTIEEQR	1	18	47.3	1.2e-07	34663.8	DNA repair protein rad14
O59753	RAD14_SCHPO	733	3	Acetyl-mENSSIVKsPNPTIEEQR	0.075	mENSSIVKsPNPTIEEQR	1	18	48	4.5e-07	34663.8	DNA repair protein rad14
O59753	RAD14_SCHPO	625.777	2	sPNPTIEEQR	0.209	sPNPTIEEQR	9	18	31.8	7.7e-05	34663.8	DNA repair protein rad14
O59757	SPC7_SCHPO	782.837	2	SSsPTSIEISDFSK	0.016		305	318	39.9	3.3e-06	153594	Kinetochore protein spc7
O59763	O59763_SCHPO	995.954	2	qPsNDAESPSDILADIKK	0.053	qPsNDAESPSDILADIKK	522	539	41.1	3.3e-07	73232.9	Serine/threonine protein kinase Oca2
O59763	O59763_SCHPO	669.98	3	QPsNDAESPSDILADIKK	0.141	QPsNDAESPSDILADIKK	522	539	45.6	1.2e-06	73232.9	Serine/threonine protein kinase Oca2
O59763	O59763_SCHPO	849.707	3	sPIFQAYPSSEDLVGDPNDPYR	0.054	sPIFQAYPSSEDLVGDPNDPYR	175	196	46.9	2e-06	73232.9	Serine/threonine protein kinase Oca2
O59763	O59763_SCHPO	649.617	3	SDNSSSsLENKLDTELK	0.005		20	36	43.2	2.7e-06	73232.9	Serine/threonine protein kinase Oca2
O59763	O59763_SCHPO	522.732	2	HHsSLDLR	0.021	HHsSLDLR	257	264	31.7	5.5e-06	73232.9	Serine/threonine protein kinase Oca2
O59763	O59763_SCHPO	901.742	3	sPIFQAYPSSEDLVGDPNDPYRR	0.294	sPIFQAYPSSEDLVGDPNDPYRR	175	197	34.2	0.00015	73232.9	Serine/threonine protein kinase Oca2
O59763	O59763_SCHPO	940.408	2	QPsNDAESPSDILADIK	0.167	QPsNDAESPSDILADIK	522	538	34.3	0.00033	73232.9	Serine/threonine protein kinase Oca2
O59763	O59763_SCHPO	494.262	2	VQsPVHIK	NA		70	77	28	0.0018	73232.9	Serine/threonine protein kinase Oca2
O59763	O59763_SCHPO	559.258	2	ImKRsSDGK	0.007		318	326	19.6	0.01	73232.9	Serine/threonine protein kinase Oca2
O59770	PSA3_SCHPO	827.882	2	DNYGsPIPGTVIADR	0.024	DNYGsPIPGTVIADR	100	114	43.1	1e-06	28031.7	Probable proteasome subunit alpha type-3
O59773	VID21_SCHPO	516.553	3	VDEVEEVHsPEAK	NA		281	293	44.4	1.2e-06	112482	Chromatin modification-related protein vid21
O59773	VID21_SCHPO	972.178	4	ETIEPTTPVKEVETtAHAEEEKGPLtPDSEYAAR			160	193	35.1	4e-06	112482	Chromatin modification-related protein vid21
O59773	VID21_SCHPO	963.458	3	ATEsPVQEVAVDVNEKPVDEIVEPSK	0.014		332	357	28.5	0.00036	112482	Chromatin modification-related protein vid21
O59773	VID21_SCHPO	441.547	3	LPSEKsPTIDR	0.029	LPSEKsPTIDR	364	374	24.6	0.0078	112482	Chromatin modification-related protein vid21
O59773	VID21_SCHPO	797.348	2	HNsYFLLPTVsR			812	823	20.8	0.0083	112482	Chromatin modification-related protein vid21
O59782	SULH3_SCHPO	698.816	2	tNPSSTAVESAPR	0.08	tNPSSTAVESAPR	529	541	41.7	6.8e-07	73468.4	Probable sulfate permease C320.05
O59782	SULH3_SCHPO	694.322	2	Acetyl-sSPSENHLLGPK	0		1	13	28.5	0.00091	73468.4	Probable sulfate permease C320.05
O59785	O59785_SCHPO	588.635	3	RPPsLVSSNDELNKK	0.092	RPPsLVSSNDELNKK	460	474	42.8	1.1e-06	56780.6	Membrane transporter
O59785	O59785_SCHPO	545.932	3	RPPsLVSSNDELNK	0.136	RPPsLVSSNDELNK	460	473	40.4	6.3e-05	56780.6	Membrane transporter
O59785	O59785_SCHPO	545.935	3	RPPSLVSsNDELNK	0.026	RPPSLVSsNDELNK	460	473	31.5	0.0015	56780.6	Membrane transporter
O59787	SRP72_SCHPO	569.239	3	Acetyl-sNHEEEIEELAQR	NA		1	14	33.4	4.4e-05	63281.7	Signal recognition particle subunit srp72
O59797	YCO6_SCHPO	746.329	3	mSAAPTPHNTPSGTsAPNFGAK	0.001		15	36	43.9	4.3e-09	44348	Putative nucleosome assembly protein C364.06
O59797	YCO6_SCHPO	767.647	3	MSAAPtPHNtPSGTSAPNFGAK			15	36	43.6	2.1e-07	44348	Putative nucleosome assembly protein C364.06
O59797	YCO6_SCHPO	741.01	3	MSAAPTPHNtPSGTSAPNFGAK	0.055	MSAAPTPHNtPSGTSAPNFGAK	15	36	43.5	3.8e-07	44348	Putative nucleosome assembly protein C364.06
O59797	YCO6_SCHPO	772.995	3	mSAAPtPHNtPSGTSAPNFGAK			15	36	35.5	2.8e-06	44348	Putative nucleosome assembly protein C364.06
O59797	YCO6_SCHPO	740.996	3	MSAAPTPHNTPsGTSAPNFGAK	0.008		15	36	37.6	2.8e-06	44348	Putative nucleosome assembly protein C364.06
O59797	YCO6_SCHPO	746.337	3	mSAAPtPHNTPSGTSAPNFGAK	0.039	mSAAPTPHNtPSGTSAPNFGAK	15	36	36	4.2e-06	44348	Putative nucleosome assembly protein C364.06
O59797	YCO6_SCHPO	772.988	3	mSAAPtPHNTPsGTSAPNFGAK			15	36	33.3	2.2e-05	44348	Putative nucleosome assembly protein C364.06
O59810	YJVE_SCHPO	669.322	3	ANsTIVDAVNITTAYASSK	0.002		470	488	50	2.6e-08	141232	KH domain-containing protein C550.14
O59810	YJVE_SCHPO	678.295	2	ASsTKsTLSSVK			133	144	43.8	6e-08	141232	KH domain-containing protein C550.14
O59810	YJVE_SCHPO	949.45	2	IDIGDVsTEETTPVSVR	0.012		916	932	52.8	6.8e-08	141232	KH domain-containing protein C550.14
O59810	YJVE_SCHPO	678.298	2	AssTKSTLSSVK			133	144	33.6	1.7e-05	141232	KH domain-containing protein C550.14
O59810	YJVE_SCHPO	594.273	2	DKIPFSAsSR	0.025	DKIPFSAsSR	123	132	23.3	0.017	141232	KH domain-containing protein C550.14
O59811	YJVF_SCHPO	777.031	3	QNLHSSSTAVGDGAsIHQNVAR	0.051	QNLHSSSTAVGDGAsIHQNVAR	377	398	54.8	4.5e-09	52251.2	Zinc finger protein C550.15c
O59811	YJVF_SCHPO	771.353	3	qNLHSSSTAVGDGAsIHQNVAR	0.026	qNLHSSSTAVGDGAsIHQNVAR	377	398	49	3.9e-08	52251.2	Zinc finger protein C550.15c
O59811	YJVF_SCHPO	449.896	3	AISLSNLsLHGR	0.003		148	159	27.7	3.1e-05	52251.2	Zinc finger protein C550.15c
O59811	YJVF_SCHPO	449.897	3	AIsLSNLSLHGR	0.008		148	159	26.2	0.00024	52251.2	Zinc finger protein C550.15c
O59823	VATD_SCHPO	746.679	3	ADsVTKEEHQGGSNTLQQTK	0.037	ADsVTKEEHQGGSNTLQQTK	217	236	45.6	4.2e-08	32219.7	Vacuolar ATP synthase subunit D
O59838	HSP7F_SCHPO	638.276	2	StPSLVSYGER	0		38	48	39.1	1.5e-07	80375.8	Heat shock protein homolog pss1
O59838	HSP7F_SCHPO	704.839	2	AIDVIVNEVsNR	NA		26	37	31.3	0.00014	80375.8	Heat shock protein homolog pss1
O59855	HSP72_SCHPO	784.338	2	TtPSYVAFTDTER	0		35	47	32.3	8.5e-07	70233.7	Probable heat shock protein ssa2
O59855	HSP72_SCHPO	478.209	3	NHLESYAYsLR	0.01		538	548	33.8	1.4e-05	70233.7	Probable heat shock protein ssa2
O59855	HSP72_SCHPO	428.209	3	GRLsKEEIDR	NA		506	515	22.4	0.0011	70233.7	Probable heat shock protein ssa2
O59868	ATC1_SCHPO	537.771	2	TKsNYLLR	0.061	TKsNYLLR	890	897	33	9.4e-06	98359.6	Calcium-transporting ATPase 1
O60057	MU147_SCHPO	957.462	4	DLESHIPGAYsPAPPSSSLPTQNESNLQQSEKPLK	0.011		13	47	40.1	1.9e-05	46218.5	Meiotically up-regulated gene 147 protein
O60057	MU147_SCHPO	679.767	4	EESGHDEEEADKDASFtGYYNSR	0.01		104	126	26.6	0.005	46218.5	Meiotically up-regulated gene 147 protein
O60059	YG58_SCHPO	900.42	2	DGVVCsPTSTGASQLLK	0.044	DGVVCsPTSTGASQLLK	97	113	40.2	1.4e-06	72823.1	Pumilio domain-containing protein C56F2.08c
O60059	YG58_SCHPO	715.002	3	SIsPSLSGISAPSASVDSSASR	0		484	505	36.6	4e-05	72823.1	Pumilio domain-containing protein C56F2.08c
O60059	YG58_SCHPO	602.758	2	LMEEVGMtSK	0.005		474	483	21.2	0.0064	72823.1	Pumilio domain-containing protein C56F2.08c
O60071	YBB9_SCHPO	915.896	2	FLPTVsGEEGDLTEEK	0.003		138	153	47.6	2.8e-09	51366	Uncharacterized protein C13G1.09
O60071	YBB9_SCHPO	752.982	3	DTLENPAIESSYEEsEHAR	0.029	DTLENPAIESSYEEsEHAR	88	106	41	3.1e-08	51366	Uncharacterized protein C13G1.09
O60079	UBP12_SCHPO	643.793	2	sISLGDASEISK			37	48	53.5	1.7e-08	111968	Probable ubiquitin carboxyl-terminal hydrolase 12
O60079	UBP12_SCHPO	877.343	2	Acetyl-mDSLSESSTSsYHGK	0		1	15	44.7	5.2e-08	111968	Probable ubiquitin carboxyl-terminal hydrolase 12
O60079	UBP12_SCHPO	869.349	2	Acetyl-MDSLSESSTSsYHGK	0.002		1	15	35.9	2.8e-05	111968	Probable ubiquitin carboxyl-terminal hydrolase 12
O60079	UBP12_SCHPO	900.7	3	DLEsTVDPLDAHSIEEEDDSEFK	0.005		722	744	25.9	0.00018	111968	Probable ubiquitin carboxyl-terminal hydrolase 12
O60079	UBP12_SCHPO	877.345	2	Acetyl-mDSLSESSTSSyHGK	0.003		1	15	21.5	0.012	111968	Probable ubiquitin carboxyl-terminal hydrolase 12
O60079	UBP12_SCHPO	924.879	2	tILSDKKDDsEDsR			810	823	21.9	0.033	111968	Probable ubiquitin carboxyl-terminal hydrolase 12
O60094	DPO5_SCHPO	931.056	3	VKDEESsEEELMNDEQMLALDEK	0		737	759	45.9	1.9e-05	109720	DNA polymerase V
O60094	DPO5_SCHPO	957.716	3	VKDEEssEEELMNDEQMLALDEK			737	759	40.8	2.9e-05	109720	DNA polymerase V
O60094	DPO5_SCHPO	963.049	3	VKDEEssEEELmNDEQMLALDEK			737	759	33.7	0.0009	109720	DNA polymerase V
O60100	IMB4_SCHPO	793.831	2	SIDQDEsDILSER	0.104	SIDQDEsDILSER	603	615	45.5	2.4e-06	117835	Probable importin subunit beta-4
O60101	PGK_SCHPO	665.979	3	VDFNVPLDGDRItNNAR	NA		23	39	41	7.6e-07	43964.3	Phosphoglycerate kinase
O60101	PGK_SCHPO	502.202	2	sMLDACVK	NA		351	358	34.6	4e-06	43964.3	Phosphoglycerate kinase
O60101	PGK_SCHPO	561.298	2	ALPGVVALsSK	0		404	414	36.8	1.7e-05	43964.3	Phosphoglycerate kinase
O60101	PGK_SCHPO	717.328	3	EDALsHVSTGGGASLELLEGK	0.004		383	403	35.5	5.8e-05	43964.3	Phosphoglycerate kinase
O60101	PGK_SCHPO	510.208	2	smLDACVK	NA		351	358	31.4	0.00015	43964.3	Phosphoglycerate kinase
O60101	PGK_SCHPO	645.285	2	GTKsMLDACVK	0.032	GTKsMLDACVK	348	358	31.2	0.00018	43964.3	Phosphoglycerate kinase
O60101	PGK_SCHPO	653.295	2	GTKsmLDACVK	0.003		348	358	23.8	0.0012	43964.3	Phosphoglycerate kinase
O60101	PGK_SCHPO	491.207	2	ELDYFsK	0.01		190	196	18.6	0.013	43964.3	Phosphoglycerate kinase
O60103	YOX7_SCHPO	580.737	2	NGsFEEIER	NA		251	259	38.1	2.1e-05	142368	Putative E3 ubiquitin-protein ligase C14F5.07
O60104	MED7_SCHPO	589.919	3	VHDYDKNsPIENEK	0.024	VHDYDKNsPIENEK	129	142	37.5	3.5e-07	43509.5	Mediator of RNA polymerase II transcription subunit 7
O60107	SNX41_SCHPO	584.775	2	SAsSAVNVEPK	0.011		17	27	45.9	1e-08	67002.2	Sorting nexin-41
O60107	SNX41_SCHPO	760.106	4	VEPsQHQGSSSVKENAISQPNESFQSR	0.004		28	54	31.5	0.0061	67002.2	Sorting nexin-41
O60108	CBH2_SCHPO	762.637	3	EFEtDEEEEESQYLLSTK	0.143	EFEtDEEEEESQYLLSTK	457	474	46.6	1e-06	59691.4	CENP-B homolog protein 2
O60119	O60119_SCHPO	644.786	2	DTIVTAESASsK	0.023	DTIVTAESASsK	227	238	47.4	3.6e-07	41235.3	MSP domain
O60119	O60119_SCHPO	725.027	3	VQDIIDNEIPKPsESPRR	0.033	VQDIIDNEIPKPSEsPRR	247	264	44.9	3.7e-06	41235.3	MSP domain
O60119	O60119_SCHPO	672.991	3	VQDIIDNEIPKPsESPR	0.002		247	263	45.7	5.7e-06	41235.3	MSP domain
O60119	O60119_SCHPO	619.955	3	DTIVTAESASsKGADVAR	0.003		227	244	38.9	2.3e-05	41235.3	MSP domain
O60119	O60119_SCHPO	646.624	3	DHLsNGVNTVVPDSTFR	0.002		181	197	30.7	0.015	41235.3	MSP domain
O60123	O60123_SCHPO	491.711	2	YQPISPtP	0.018		503	510	22.3	0.0011	57644.6	Serine carboxypeptidase
O60129	FKH2_SCHPO	794.334	2	DVGsPSTAETSAEEK	0.094	DVGsPSTAETSAEEK	372	386	59	5.7e-11	71174.4	Fork head protein homolog 2
O60129	FKH2_SCHPO	714.379	2	EGsPSLPIPILPK	0.037	EGsPSLPIPILPK	332	344	36	3.5e-06	71174.4	Fork head protein homolog 2
O60129	FKH2_SCHPO	966.82	3	LPtPTSQTESASVPQIANPPNSQNLVK	0		597	623	44.5	3.7e-06	71174.4	Fork head protein homolog 2
O60129	FKH2_SCHPO	588.305	2	SPSsPVPLLAK	0.007		319	329	31.9	2.5e-05	71174.4	Fork head protein homolog 2
O60129	FKH2_SCHPO	651.661	3	EKsPQQYIQVPQSNVK	0.051	EKsPQQYIQVPQSNVK	624	639	23.2	0.00097	71174.4	Fork head protein homolog 2
O60129	FKH2_SCHPO	656.286	3	qAKEMESKMsNSPtQK			553	568	23.7	0.013	71174.4	Fork head protein homolog 2
O60130	YH7G_SCHPO	813.82	2	SSsQDEFESLFDR	0		110	122	36.7	1.6e-05	94566.5	Uncharacterized transcriptional regulatory protein C16G5.16
O60132	TEA4_SCHPO	667.803	2	LYSSSTPSsPTK	0.004		520	531	38.3	7.2e-07	89562.6	Tip elongation aberrant protein Tea4
O60132	TEA4_SCHPO	606.282	2	TLEAPsPNFR	0.255	TLEAPsPNFR	210	219	40.5	1.6e-05	89562.6	Tip elongation aberrant protein Tea4
O60132	TEA4_SCHPO	541.605	3	QADKVELsPSSLLR	0.058	QADKVELsPSSLLR	546	559	19.8	0.019	89562.6	Tip elongation aberrant protein Tea4
O60139	UBP4_SCHPO	789.389	2	sPIAPLTEDQLSAR	0.288	sPIAPLTEDQLSAR	188	201	38	2.5e-06	49749.9	Probable ubiquitin carboxyl-terminal hydrolase 4
O60146	YNSG_SCHPO	720.825	2	sNSFNELPPLSR	0.007		50	61	30.7	0.0014	118133	Uncharacterized transporter C18H10.16
O60159	YHYB_SCHPO	585.955	3	INDsYENIELKPLK	0.039	INDsYENIELKPLK	795	808	29.8	0.00038	90563.8	Uncharacterized chloride channel protein C19C7.11
O60163	AK_SCHPO	402.521	3	HGSAtPPHPPK	0.005		324	334	29.3	3.2e-06	56813.1	Probable aspartokinase
O60163	AK_SCHPO	643.315	2	GTVIFPDtISR	0.014		313	323	28.2	0.0026	56813.1	Probable aspartokinase
O60167	YHC3_SCHPO	726.832	2	SGsPVEETAILNR			285	297	58.5	3.4e-09	72985.9	ENTH domain-containing protein C19F8.03c
O60167	YHC3_SCHPO	600.28	3	NNLSAEGTsASPSLDKK	0.014		407	423	55.2	8.6e-09	72985.9	ENTH domain-containing protein C19F8.03c
O60167	YHC3_SCHPO	835.875	2	NNLSAEGTSAsPSLDK	0.036	NNLSAEGTSAsPSLDK	407	422	44.7	1.1e-07	72985.9	ENTH domain-containing protein C19F8.03c
O60167	YHC3_SCHPO	629.97	3	LDVPERPmsTPYTASK	0		605	620	28.8	0.00015	72985.9	ENTH domain-containing protein C19F8.03c
O60170	MEU22_SCHPO	728.34	4	ALPsImNVVILLSTLSVGNsASYAASR			341	367	23.6	0.014	62692	Probable amino-acid permease meu22
O60171	O60171_SCHPO	967.413	2	Acetyl-sDINNNEPAENIEQPK	NA		1	17	35	6.6e-05	23526	Transcription factor TFIID complex subunit Taf10
O60176	YG41_SCHPO	920.668	4	SNDEPVQSQDPISPNMASNESGNsENTSNYGSSR	0.003		52	85	50.7	3.2e-06	51705.1	Uncharacterized RNA-binding protein C23E6.01c
O60176	YG41_SCHPO	924.661	4	SNDEPVQSQDPISPNmASNESGNsENTSNYGSSR			52	85	46.8	3.9e-06	51705.1	Uncharacterized RNA-binding protein C23E6.01c
O60176	YG41_SCHPO	698.803	2	Acetyl-SSsPTESEILPK			1	13	31.1	0.00054	51705.1	Uncharacterized RNA-binding protein C23E6.01c
O60176	YG41_SCHPO	717.792	2	ssSPTESEILPK			1	13	21.1	0.035	51705.1	Uncharacterized RNA-binding protein C23E6.01c
O60181	RIB3_SCHPO	637.791	2	qLANPEVTsPR	0.003		109	119	27.3	0.0013	22564	3,4-dihydroxy-2-butanone 4-phosphate synthase
O60181	RIB3_SCHPO	646.307	2	QLANPEVTsPR	0.008		109	119	24.5	0.0016	22564	3,4-dihydroxy-2-butanone 4-phosphate synthase
O60182	RFC1_SCHPO	857.879	2	IVLsDDEDGTIENSK	0.081	IVLsDDEDGTIENSK	39	53	40.4	3.8e-06	103490	Replication factor C subunit 1
O60183	SAT1_SCHPO	752.876	2	VLCRLLLsKsR			331	341	27.9	0.0012	62619	Protein sat1
O60184	YG49_SCHPO	867.886	2	SsPSPENQDSTPLAPK	0		1058	1073	55.3	2.7e-09	121518	TPR repeat-containing protein C23E6.09
O60184	YG49_SCHPO	437.53	3	SESLPKsPEEK	0.229	SESLPKsPEEK	986	996	40.5	1.4e-06	121518	TPR repeat-containing protein C23E6.09
O60184	YG49_SCHPO	591.948	3	KLENSTVVSGsPSSSSK	0.04	KLENSTVVSGsPSSSSK	885	901	44.7	1.1e-05	121518	TPR repeat-containing protein C23E6.09
O60184	YG49_SCHPO	788.688	3	EsQERSSPSPENQDSTPLAPK	0.01		1053	1073	33.2	0.00021	121518	TPR repeat-containing protein C23E6.09
O74135	CKI3_SCHPO	584.929	3	Acetyl-STTsSHSNVVGVHYR	0.008		1	16	38.3	1.5e-05	50215.5	Casein kinase I homolog 3
O74173	EF1B_SCHPO	902.363	4	EVSAYGPEGAAAAEEDEIDLFGsDEEEDPEAER	0.097	EVSAYGPEGAAAAEEDEIDLFGsDEEEDPEAER	74	106	49.9	8.7e-06	23484.5	Elongation factor 1-beta
O74173	EF1B_SCHPO	645.796	2	GFSDLTsDAGLK	0.016		1	13	33.1	3.4e-05	23484.5	Elongation factor 1-beta
O74175	RL13_SCHPO	672.838	2	VAsTIGIPVDHR	0.019		89	100	30.7	1.6e-06	23529.2	60S ribosomal protein L13
O74175	RL13_SCHPO	973.479	4	KGDATDVsGAEQTDVAAVLPITQEAVEEAKPITEEAK	0.01		135	171	34.2	5.7e-05	23529.2	60S ribosomal protein L13
O74191	FKBP4_SCHPO	641.279	2	QQASSNAPSsPK	0.008		240	251	36	1.8e-06	39302	FK506-binding protein 39 kDa
O74304	WIN1_SCHPO	784.335	3	NTtNSINNVSQIsNGPFVER			481	500	39	1.1e-06	163274	MAP kinase kinase kinase win1
O74304	WIN1_SCHPO	757.684	3	NTTNSINNVSQIsNGPFVER	0.011		481	500	37.6	1.3e-05	163274	MAP kinase kinase kinase win1
O74304	WIN1_SCHPO	527.259	3	RSsINPILDSELR	0.015		21	33	32.7	0.00012	163274	MAP kinase kinase kinase win1
O74304	WIN1_SCHPO	736.678	3	SIsSPmIDVEHINSTAVPSK	0.023	SIsSPmIDVEHINSTAVPSK	188	207	27.1	0.00081	163274	MAP kinase kinase kinase win1
O74304	WIN1_SCHPO	565.293	2	LRNsITFAK	0.011		221	229	25.5	0.0017	163274	MAP kinase kinase kinase win1
O74306	RL5B_SCHPO	462.191	2	sSPYFSR	0.005		9	15	31.9	6.5e-06	33486.1	60S ribosomal protein L5-B
O74309	SLM9_SCHPO	620.327	3	SILLRPPPSIASsPESK	0		410	426	27.7	0.00048	90434	Histone transcription regulator slm9
O74312	ATG9_SCHPO	715.35	2	KNNPTDLLYsGK	0.028	KNNPtDLLYSGK	69	80	34.2	1.1e-05	81706.1	Autophagy-related protein 9
O74325	YH05_SCHPO	510.933	3	RPsVIPRPQEGSK	0.046	RPsVIPRPQEGSK	525	537	37.1	4.6e-06	111294	PDZ domain-containing protein C1685.05
O74329	RS29_SCHPO	451.706	2	YGLNIsR	0.144	YGLNIsR	34	40	39.9	1.3e-07	6657.7	40S ribosomal protein S29
O74329	RS29_SCHPO	515.76	2	KYGLNIsR	0.018		33	40	19.3	0.031	6657.7	40S ribosomal protein S29
O74338	YH25_SCHPO	550.717	2	FSSFSGsSSK	0.001		634	643	40	4e-08	78117.4	Uncharacterized protein C1A4.05
O74341	TCPG_SCHPO	858.864	2	Acetyl-MQsPVFVMNTNGNR	0.317	MQsPVFVMNTNGNR	1	14	34.8	3.9e-07	58481.1	T-complex protein 1 subunit gamma
O74341	TCPG_SCHPO	707.345	2	KGEsQTNIEISK	0.131	KGESQTNIEIsK	247	258	23	0.014	58481.1	T-complex protein 1 subunit gamma
O74343	YH2X_SCHPO	734.354	3	sPIVDPEAPDLLEDLPVSSK	0.295	sPIVDPEAPDLLEDLPVSSK	505	524	42.3	1.3e-07	76439	Putative pseudouridine synthase C1A4.09
O74350	YNOA_SCHPO	762.389	3	KKtPEIAAPANIEPEVAPTTK	0.229	KKtPEIAAPANIEPEVAPTTK	151	171	32.2	0.0013	34145.7	Bromodomain-containing protein C21D10.10
O74354	DNT1_SCHPO	727.647	3	ANFFSINDASSDSSsDAPLR	0.003		235	254	45.3	3.3e-07	65978	Nucleolar protein dnt1
O74354	DNT1_SCHPO	777.346	3	AYsISSNHDNESTLTEGIALK	0.014		170	190	42.9	2e-06	65978	Nucleolar protein dnt1
O74354	DNT1_SCHPO	403.675	2	TLsYSR	0.04	TLsYSR	501	506	21.1	0.00039	65978	Nucleolar protein dnt1
O74354	DNT1_SCHPO	403.696	2	TLSYsR	0.012		501	506	17	0.011	65978	Nucleolar protein dnt1
O74360	RGA4_SCHPO	775.681	3	SLNLSQVsLHQACEPEYNR	0.02		441	459	43.5	2e-07	104488	Probable Rho-type GTPase-activating protein 4
O74360	RGA4_SCHPO	733.333	3	KsESPVWALNPDDFDQNR	0.024	KsESPVWALNPDDFDQNR	737	754	37.6	6.1e-05	104488	Probable Rho-type GTPase-activating protein 4
O74360	RGA4_SCHPO	733.326	3	KSEsPVWALNPDDFDQNR	0.003		737	754	40	7.4e-05	104488	Probable Rho-type GTPase-activating protein 4
O74360	RGA4_SCHPO	973.43	3	SANAsPFDSCDSFHSGSSIPIEPVSSR	0.002		253	279	31.3	0.0022	104488	Probable Rho-type GTPase-activating protein 4
O74360	RGA4_SCHPO	627.959	3	MQNTSsPTNSLRPQLK	0		189	204	31.3	0.0036	104488	Probable Rho-type GTPase-activating protein 4
O74360	RGA4_SCHPO	633.308	3	mQNTsSPTNSLRPQLK	0		189	204	28.7	0.0046	104488	Probable Rho-type GTPase-activating protein 4
O74360	RGA4_SCHPO	633.298	3	mQNTSSPTNsLRPQLK	0.012		189	204	24.4	0.049	104488	Probable Rho-type GTPase-activating protein 4
O74363	YND2_SCHPO	745.348	2	FDAsSVDLVSLTR	0.005		589	601	49.1	3.7e-07	79052.9	G-patch and R3H domain-containing protein C30B4.02c
O74364	O74364_SCHPO	734.331	3	STSSNIPYANPAPSGFNGsPR	0.001		274	294	30.8	0.00028	43837.8	Conserved protein
O74374	PGM_SCHPO	562.969	3	LTGGIILTAsHNAGGPK	0.002		104	120	56.1	1.9e-10	60599.4	Probable phosphoglucomutase
O74387	YNVC_SCHPO	532.89	3	tSNPFSCLNHSPR	0.002		169	181	27.9	0.00046	32069.1	Uncharacterized protein C3H7.12
O74388	YNVD_SCHPO	810.384	3	STsPLSSSPFVTEAALNEAELAK	0.007		229	251	47.3	1.2e-05	33904.6	Uncharacterized protein C3H7.13
O74395	STR1_SCHPO	700.316	3	EVSLQDAKQsDEKGVEEK	0.029	EVSLQDAKQsDEKGVEEK	39	56	39.9	6.6e-06	68156.9	Siderophore iron transporter 1
O74399	O74399_SCHPO	783.071	4	CSLDSFGNAHNIDsDEDAVNESLSHSTK	0.009		417	444	40.1	4.6e-05	82526.8	WD repeat/BOP1NT protein
O74407	O74407_SCHPO	782.352	2	TDGFLSQsPQLYK	0.021	TDGFLSQsPQLYK	300	312	34.2	6.4e-05	66671.4	Aspartate-tRNA ligase
O74407	O74407_SCHPO	605.798	2	QVENLsLEAK	NA		7	16	33.4	0.00022	66671.4	Aspartate-tRNA ligase
O74412	O74412_SCHPO	763.812	2	NSsPNQYYASTSK	0.006		262	274	44.4	5e-08	108336	Transcription factor
O74413	AROC_SCHPO	504.727	2	Acetyl-SsFGTLFK	0.018		1	9	35.1	2.2e-05	42325.2	Chorismate synthase
O74413	AROC_SCHPO	972.434	2	CPHAAtAAKMAERItR			208	223	22.1	0.015	42325.2	Chorismate synthase
O74417	YJL4_SCHPO	741.813	2	TSTPNMSNNPsPR	0.054	TSTPNMSNNPsPR	300	312	65.2	1.9e-10	52625	Uncharacterized protein C14G10.04
O74417	YJL4_SCHPO	749.812	2	TSTPNmSNNPsPR	0.046	TSTPNmSNNPsPR	300	312	50.7	4.7e-08	52625	Uncharacterized protein C14G10.04
O74417	YJL4_SCHPO	726.692	3	SAAQAmATVVPSVSTPGGtPPR	0.15	SAAQAmATVVPSVSTPGGtPPR	240	261	42.3	1.4e-07	52625	Uncharacterized protein C14G10.04
O74417	YJL4_SCHPO	683.817	2	sPEISAPPGLYR	0.114	sPEISAPPGLYR	436	447	32.6	2.4e-06	52625	Uncharacterized protein C14G10.04
O74417	YJL4_SCHPO	555.621	3	AVKsPEISAPPGLYR	0.049	AVKsPEISAPPGLYR	433	447	28.6	0.00014	52625	Uncharacterized protein C14G10.04
O74417	YJL4_SCHPO	613.941	3	SSsIGHSGSTAPWSSVGR	0		123	140	31.3	0.0062	52625	Uncharacterized protein C14G10.04
O74417	YJL4_SCHPO	613.941	3	SSSIGHSGStAPWSSVGR	0		123	140	22.8	0.025	52625	Uncharacterized protein C14G10.04
O74418	O74418_SCHPO	828.357	2	DGVsPFSPEGEGLER	0.134	DGVsPFSPEGEGLER	115	129	47.7	7.3e-08	29381.1	RNA-binding protein
O74418	O74418_SCHPO	828.349	2	DGVSPFsPEGEGLER	0.122	DGVSPFsPEGEGLER	115	129	61.2	8.2e-08	29381.1	RNA-binding protein
O74418	O74418_SCHPO	868.34	2	DGVsPFsPEGEGLER			115	129	37	1.4e-07	29381.1	RNA-binding protein
O74418	O74418_SCHPO	631.254	3	RDGVsPFsPEGEGLER			114	129	37.5	1e-05	29381.1	RNA-binding protein
O74418	O74418_SCHPO	604.6	3	RDGVsPFSPEGEGLER	0.072	RDGVsPFSPEGEGLER	114	129	42.4	0.00021	29381.1	RNA-binding protein
O74418	O74418_SCHPO	744.683	3	LQAPsPKEEEERPVDQGDK	NA		136	154	24	0.008	29381.1	RNA-binding protein
O74423	ENT1_SCHPO	781.672	3	RPsPSAEHNSAEENDPELQR	0.01		218	237	42.2	1.8e-06	80174.9	Epsin-1
O74423	ENT1_SCHPO	781.67	3	RPSPsAEHNSAEENDPELQR	0.008		218	237	39.1	7.1e-06	80174.9	Epsin-1
O74423	ENT1_SCHPO	808.333	3	RPsPSAEHNsAEENDPELQR			218	237	27.2	0.0018	80174.9	Epsin-1
O74424	NU211_SCHPO	677.307	2	LLDmAPAtPNSK	0.067	LLDmAPAtPNSK	643	654	40	1.3e-07	211461	Nucleoporin nup211
O74424	NU211_SCHPO	669.313	2	LLDMAPAtPNSK	0.067	LLDMAPAtPNSK	643	654	32.5	4e-05	211461	Nucleoporin nup211
O74424	NU211_SCHPO	645.275	3	EHSPtQGSLENADEIAR	0.009		1556	1572	36.5	0.00042	211461	Nucleoporin nup211
O74427	URK1_SCHPO	707.265	3	ysSNPtYEPPWRKVR			8	22	23.3	0.009	51390.1	Uridine kinase
O74428	YQ5C_SCHPO	791.38	3	AHsQNPNSSLVNNSSAVSHLTK	0.073	AHsQNPNSSLVNNSSAVSHLTK	68	89	47.5	5.3e-08	49212.6	Uncharacterized protein C162.12
O74428	YQ5C_SCHPO	472.891	3	sLNDLHELNGPK	NA		92	103	31	1.3e-06	49212.6	Uncharacterized protein C162.12
O74428	YQ5C_SCHPO	562.78	2	GNsLSLLANR	0.113	GNsLSLLANR	261	270	32.2	2.5e-06	49212.6	Uncharacterized protein C162.12
O74428	YQ5C_SCHPO	561.932	3	qRsLNDLHELNGPK	NA		90	103	32.3	3.7e-05	49212.6	Uncharacterized protein C162.12
O74428	YQ5C_SCHPO	512.746	2	LLQLWsQG	NA		444	451	23.4	0.0012	49212.6	Uncharacterized protein C162.12
O74428	YQ5C_SCHPO	892.86	2	DDGVQsASLNAsmSAR			403	418	18.3	0.03	49212.6	Uncharacterized protein C162.12
O74429	ASP1_SCHPO	684.339	2	TAsPVSSIVTPTK	0		19	31	51.2	5.4e-10	105681	Cortical actin cytoskeleton protein asp1
O74429	ASP1_SCHPO	508.603	3	TAsPVSSIVTPTKR	0.116	TAsPVSSIVTPTKR	19	32	31.7	1.3e-07	105681	Cortical actin cytoskeleton protein asp1
O74429	ASP1_SCHPO	567.302	2	LPQsPSLIAK	0.049	LPQsPSLIAK	703	712	36	9e-06	105681	Cortical actin cytoskeleton protein asp1
O74429	ASP1_SCHPO	884.736	3	TDsNGNLVGmTGANTNHTERPLEK	0.007		718	741	31.3	4.5e-05	105681	Cortical actin cytoskeleton protein asp1
O74429	ASP1_SCHPO	879.405	3	TDsNGNLVGMTGANTNHTERPLEK	0.008		718	741	31.9	0.0003	105681	Cortical actin cytoskeleton protein asp1
O74429	ASP1_SCHPO	724.335	2	tAsPVSSIVTPTK			19	31	23.4	0.0017	105681	Cortical actin cytoskeleton protein asp1
O74434	MU174_SCHPO	729.793	2	NDEEDSAsLASLK	0.012		501	513	37.9	1.8e-05	69240.9	Meiotically up-regulated gene 174 protein
O74434	MU174_SCHPO	700.8	2	QQMLsPETMQK	0.053	QQMLsPETMQK	144	154	24.8	0.0032	69240.9	Meiotically up-regulated gene 174 protein
O74448	PIN1_SCHPO	748.012	3	FIANELQESVTPTEASNsPK	0.009		47	66	43.4	5.4e-06	19773.4	Peptidyl-prolyl cis-trans isomerase pin1
O74448	PIN1_SCHPO	748.013	3	FIANELQESVtPTEASNSPK	0.018		47	66	41.9	5.6e-06	19773.4	Peptidyl-prolyl cis-trans isomerase pin1
O74448	PIN1_SCHPO	889.684	4	sRNRPYFFNTETHESLWEPPAAtDmAALK			17	45	25.5	0.0096	19773.4	Peptidyl-prolyl cis-trans isomerase pin1
O74449	YCG4_SCHPO	681.968	3	SKtPDPSEDEGEFALTLK	0.011		176	193	39.4	1.5e-07	30735	Uncharacterized protein C16C4.04
O74452	SCW1_SCHPO	813.682	3	KGsQTNLSDETEGSESSVSFNR	0.005		189	210	49.1	1.8e-08	60394.3	Cell wall integrity protein scw1
O74452	SCW1_SCHPO	784.346	2	DEVGSPtWSPTPSK	0.005		294	307	51.3	3.3e-08	60394.3	Cell wall integrity protein scw1
O74452	SCW1_SCHPO	481.238	3	NHsPTRPLLGNR	0.097	NHsPTRPLLGNR	214	225	25.7	0.00029	60394.3	Cell wall integrity protein scw1
O74452	SCW1_SCHPO	651.551	4	HSKtPLGDSTFQAPNNGGSLHSDR	0.01		251	274	30.6	0.00062	60394.3	Cell wall integrity protein scw1
O74452	SCW1_SCHPO	635.608	3	GYSAHTQNSSAQsPHPR	0.023	GYSAHTQNSSAQsPHPR	342	358	29	0.0017	60394.3	Cell wall integrity protein scw1
O74463	YQC1_SCHPO	821.872	2	SDTAsPETIAGLGDTK	0.017		495	510	48.2	9.9e-09	57978.9	Uncharacterized protein C1739.01
O74463	YQC1_SCHPO	734.831	2	NDPVVSTNNsVSR	0.016		511	523	48.7	1.6e-07	57978.9	Uncharacterized protein C1739.01
O74463	YQC1_SCHPO	699.866	2	ASLPLQsPPLAPK	0.419	ASLPLQsPPLAPK	295	307	36.7	3.7e-07	57978.9	Uncharacterized protein C1739.01
O74463	YQC1_SCHPO	764.351	2	QMGANQIsPSLSSK	0.113	QMGANQIsPSLSSK	125	138	49.6	7.4e-07	57978.9	Uncharacterized protein C1739.01
O74463	YQC1_SCHPO	763.839	2	qmGANQIsPSLSSK	0.055	qmGANQIsPSLSSK	125	138	43.6	8e-07	57978.9	Uncharacterized protein C1739.01
O74463	YQC1_SCHPO	654.981	3	SNSYAGAFPSVVSAsLPTK	0.065	SNSYAGAFPSVVSAsLPTK	341	359	44.3	2.3e-06	57978.9	Uncharacterized protein C1739.01
O74463	YQC1_SCHPO	654.981	3	sNSYAGAFPSVVSASLPTK	0.001		341	359	38.3	4.7e-06	57978.9	Uncharacterized protein C1739.01
O74463	YQC1_SCHPO	930.717	3	ITVANSsPPWNSTVEEETPFQmDD	0.009		524	547	36.2	5.2e-06	57978.9	Uncharacterized protein C1739.01
O74463	YQC1_SCHPO	861.856	2	SDtAsPETIAGLGDTK			495	510	39.7	6.1e-06	57978.9	Uncharacterized protein C1739.01
O74463	YQC1_SCHPO	772.346	2	QmGANQIsPSLSSK	0.074	QmGANQIsPSLSSK	125	138	42	7.2e-06	57978.9	Uncharacterized protein C1739.01
O74463	YQC1_SCHPO	755.839	2	qMGANQIsPSLSSK	0.088	qMGANQIsPSLSSK	125	138	38.1	1.8e-05	57978.9	Uncharacterized protein C1739.01
O74463	YQC1_SCHPO	637.591	3	VDLNHQmDVsDEEQR	NA		360	374	38	1.9e-05	57978.9	Uncharacterized protein C1739.01
O74463	YQC1_SCHPO	925.385	3	ITVANSsPPWNSTVEEETPFQMDD	0.007		524	547	37.1	9.7e-05	57978.9	Uncharacterized protein C1739.01
O74463	YQC1_SCHPO	535.278	2	LKsEPIFR	NA		487	494	27.2	0.00013	57978.9	Uncharacterized protein C1739.01
O74463	YQC1_SCHPO	697.282	2	CSSTDTLSsLSR	0.014		275	286	28.9	0.00014	57978.9	Uncharacterized protein C1739.01
O74463	YQC1_SCHPO	697.29	2	CSStDTLSSLSR	0.01		275	286	36.1	0.00023	57978.9	Uncharacterized protein C1739.01
O74463	YQC1_SCHPO	535.598	3	QYTSSLKsPGLSTR	0.032	QYTSSLKsPGLSTR	402	415	27.1	0.0025	57978.9	Uncharacterized protein C1739.01
O74470	O74470_SCHPO	488.887	3	SVLDsPPHEFEK	0.126	SVLDsPPHEFEK	113	124	36	6.7e-06	28377	Short chain dehydrogenase
O74470	O74470_SCHPO	488.886	3	sVLDSPPHEFEK	0.165	SVLDsPPHEFEK	113	124	18.6	0.035	28377	Short chain dehydrogenase
O74472	MUG33_SCHPO	580.769	2	sLSSYAPTVR	0.031	sLSSYAPTVR	257	266	37	1e-07	37075.1	Meiotically up-regulated gene 33 protein
O74472	MUG33_SCHPO	622.791	2	LKPTFsNDSR	0.06	LKPTFsNDSR	247	256	40.4	0.00021	37075.1	Meiotically up-regulated gene 33 protein
O74475	BGS4_SCHPO	672.631	3	ILVEENAPYENDsVSEK	0.008		957	973	38.8	6.1e-07	225189	1,3-beta-glucan synthase component bgs4
O74485	CUE3_SCHPO	697.986	3	STVAEEDDITHLNIsPDR	0.003		367	384	47.3	4.3e-06	65858.1	CUE domain-containing protein 3
O74489	O74489_SCHPO	825.832	2	NGAEIACsYEDLTK	0.001		184	197	47.4	5.3e-08	34947.6	Quinone oxidoreductase
O74489	O74489_SCHPO	555.28	2	Acetyl-sNLLVQVSK	0.067	MsNLLVQVSK	1	10	33.8	1.8e-05	34947.6	Quinone oxidoreductase
O74489	O74489_SCHPO	655.338	2	tGPSSVLQVITK	0.042	tGPSSVLQVITK	11	22	31.3	2.8e-05	34947.6	Quinone oxidoreductase
O74490	IST1_SCHPO	585.757	2	APsFEELAAR	NA		255	264	44.2	1.6e-07	30808.3	IST1 homolog
O74500	O74500_SCHPO	855.915	2	SASPSSSVIsPAASLNR	0.018		157	173	56	5.2e-08	80253.3	Nucleoporin Nup60
O74500	O74500_SCHPO	662.285	2	qGsLEEEPFPK	NA		690	700	32.3	4.5e-06	80253.3	Nucleoporin Nup60
O74500	O74500_SCHPO	855.921	2	sASPSSSVISPAASLNR	0.006		157	173	38.9	2.1e-05	80253.3	Nucleoporin Nup60
O74500	O74500_SCHPO	562.257	3	TDKQGsLEEEPFPK	0.001		687	700	25.7	0.00055	80253.3	Nucleoporin Nup60
O74500	O74500_SCHPO	625.633	3	TALSEPENKtPVFSFK	0.017		438	453	23.8	0.01	80253.3	Nucleoporin Nup60
O74500	O74500_SCHPO	709.812	2	DGNHSNGPQTPsK	0.008		29	41	19.9	0.012	80253.3	Nucleoporin Nup60
O74501	YCRE_SCHPO	512.763	2	IIsAIDGKK	NA		255	263	22.1	0.01	132876	Uncharacterized protein CC285.14
O74503	UAF30_SCHPO	640.933	3	CFDETAAPsEKESLEK	0.002		51	66	39.1	2e-06	26651.6	Upstream activation factor subunit spp27
O74504	YJD1_SCHPO	799.334	2	YFtALEmQQDQK	0.016		374	385	38.9	3.6e-07	88749.5	Uncharacterized protein C594.01
O74504	YJD1_SCHPO	539.224	3	DFDGFTPDGsPPKR	0.108	DFDGFTPDGsPPKR	43	56	43.1	6.4e-07	88749.5	Uncharacterized protein C594.01
O74504	YJD1_SCHPO	951.899	2	TDLIEsDSGIEASESNR	0.07	TDLIEsDSGIEASESNR	488	504	36.5	2.3e-06	88749.5	Uncharacterized protein C594.01
O74504	YJD1_SCHPO	548.226	2	SDIFSFsGR	0.049	SDIFSFsGR	507	515	37.2	6.3e-06	88749.5	Uncharacterized protein C594.01
O74504	YJD1_SCHPO	792.701	3	sAATSLAPVEDDEDDELLLHR	0.049	sAATSLAPVEDDEDDELLLHR	294	314	29.6	0.00068	88749.5	Uncharacterized protein C594.01
O74504	YJD1_SCHPO	503.234	2	KHVsTPEK	0		571	578	19.4	0.049	88749.5	Uncharacterized protein C594.01
O74505	O74505_SCHPO	497.568	3	NTsDIDLLHINR	0.022	NTsDIDLLHINR	25	36	32.4	1.5e-05	54867.4	Conserved fungal protein
O74505	O74505_SCHPO	653.317	2	SStLTERPVVH	0		479	489	31.1	2.8e-05	54867.4	Conserved fungal protein
O74505	O74505_SCHPO	816.715	3	GTsSSQPSENDANITALPKPEPK	0.004		270	292	34.5	3.3e-05	54867.4	Conserved fungal protein
O74505	O74505_SCHPO	494.57	3	SLPKtSDLEQQR	0		258	269	28.8	0.0019	54867.4	Conserved fungal protein
O74511	EKC1_SCHPO	988.08	3	ALHHGDDDAAsDTSYEPLPESVIEDAK	0.007		481	507	48.7	1.5e-08	94967.9	Extragenic suppressor of kinetochore protein 1
O74511	EKC1_SCHPO	927.051	3	DNLNLTTTDsPMSEAEPVSEEEYK	0.001		450	473	45.9	1.4e-07	94967.9	Extragenic suppressor of kinetochore protein 1
O74511	EKC1_SCHPO	932.374	3	DNLNLTtTDSPmSEAEPVSEEEYK	0.003		450	473	45.1	6.2e-07	94967.9	Extragenic suppressor of kinetochore protein 1
O74511	EKC1_SCHPO	761.301	4	ALHHGDDDAAsDTsYEPLPESVIEDAK			481	507	51.1	9.9e-07	94967.9	Extragenic suppressor of kinetochore protein 1
O74511	EKC1_SCHPO	761.302	4	ALHHGDDDAASDTsyEPLPESVIEDAK			481	507	47.5	1.2e-06	94967.9	Extragenic suppressor of kinetochore protein 1
O74511	EKC1_SCHPO	611.907	3	RLsFESANDSDQDNR	0.05	RLsFESANDSDQDNR	732	746	35	1.1e-05	94967.9	Extragenic suppressor of kinetochore protein 1
O74511	EKC1_SCHPO	837.989	3	ELSHNSSsNDEDDGNDEDPLSR	0		706	727	40	1.5e-05	94967.9	Extragenic suppressor of kinetochore protein 1
O74511	EKC1_SCHPO	648.955	3	GFAEEEYsDGLVLNHGK	0.005		822	838	27.1	0.0012	94967.9	Extragenic suppressor of kinetochore protein 1
O74511	EKC1_SCHPO	611.913	3	RLSFEsANDSDQDNR	0.027	RLsFESANDSDQDNR	732	746	29.2	0.0014	94967.9	Extragenic suppressor of kinetochore protein 1
O74521	O74521_SCHPO	977.149	4	AsSVQGNEDEVPDTASETEHSEIEDFHFDPYSEK	0.003		376	409	42.2	1.8e-07	74753.4	Conserved fungal protein
O74526	KJ45_SCHPO	497.599	3	KKPSPLsPNSSIR	0.056	KKPSPLsPNSSIR	247	259	42.1	6.2e-08	85910.3	Probable serine/threonine-protein kinase C70.05c
O74526	KJ45_SCHPO	748.385	4	VNHTTDSMAHVPGNNSPLQTPQKsPPR	0.024	VNHTTDSMAHVPGNNSPLQTPQKsPPR	71	97	40.7	1.6e-07	85910.3	Probable serine/threonine-protein kinase C70.05c
O74526	KJ45_SCHPO	608.282	3	SQSYQHLKNsPPNSR	0.044	SQSYQHLKNsPPNSR	181	195	34.9	1.3e-06	85910.3	Probable serine/threonine-protein kinase C70.05c
O74526	KJ45_SCHPO	497.586	3	KKPsPLSPNSSIR	0.043	KKPSPLsPNSSIR	247	259	35.9	4.4e-06	85910.3	Probable serine/threonine-protein kinase C70.05c
O74526	KJ45_SCHPO	752.357	4	VNHTTDSmAHVPGNNSPLQTPQKsPPR	0.062	VNHTTDSmAHVPGNNSPLQTPQKsPPR	71	97	40.3	5e-06	85910.3	Probable serine/threonine-protein kinase C70.05c
O74526	KJ45_SCHPO	752.358	4	VNHTTDSmAHVPGNNSPLQtPQKSPPR	0.04	VNHTTDSmAHVPGNNSPLQTPQKsPPR	71	97	26.8	0.001	85910.3	Probable serine/threonine-protein kinase C70.05c
O74526	KJ45_SCHPO	545.641	3	SIGSGTPAPVRKGLsK	0.503	SIGSGTPAPVRKGLsK	27	42	20.5	0.021	85910.3	Probable serine/threonine-protein kinase C70.05c
O74536	SNF1_SCHPO	554.941	3	sKQELIDPTLEGPR	0.229	sKQELIDPTLEGPR	382	395	38.4	1.5e-06	65996.6	SNF1-like protein kinase ssp2
O74536	SNF1_SCHPO	922.906	2	TsCGSPNYAAPEVINGK	0		189	205	35.8	5.6e-06	65996.6	SNF1-like protein kinase ssp2
O74555	BBP_SCHPO	632.915	3	ERsPsPPPQYDNHGR			129	143	26.1	0.0051	63622.1	Branchpoint-bridging protein
O74561	O74561_SCHPO	678.96	3	SGsPSVGAQHDLDEVISEK	0.01		196	214	40	5.1e-06	108720	Inositol polyphosphate kinase
O74561	O74561_SCHPO	620.263	2	SNsQEQTPLR	0.028	SNsQEQTPLR	86	95	44.1	2.9e-05	108720	Inositol polyphosphate kinase
O74561	O74561_SCHPO	754.642	3	RFsSDAVWEEPESNEFPR	0		583	600	37.5	0.00011	108720	Inositol polyphosphate kinase
O74562	SEC8_SCHPO	579.941	3	QKNPsLEGLNELCR	NA		756	769	24.8	0.0054	124802	Exocyst complex component sec8
O74627	CG1C_SCHPO	548.566	3	TDsFHSLNTETPSK	0.007		300	313	29.8	0.00096	38286.6	Cyclin pch1
O74627	CG1C_SCHPO	902.282	2	tDsFHSLNTETPsK			300	313	19	0.013	38286.6	Cyclin pch1
O74648	O74648_SCHPO	841.863	2	Acetyl-sDSQDKNYISFEK			1	14	44.4	9.5e-07	27991.4	Isoamyl acetate hydrolytic enzyme homolog
O74648	O74648_SCHPO	861.892	2	LRVDVWGFsGYTSR	0.036	LRVDVWGFsGYTSR	69	82	21	0.013	27991.4	Isoamyl acetate hydrolytic enzyme homolog
O74653	POB1_SCHPO	896.862	2	sSPTDsISQNSGLPSR			439	454	46.4	1.9e-08	93774	Protein pob1
O74653	POB1_SCHPO	650.28	3	RSsPTDsISQNSGLPSR			438	454	51.9	2.1e-07	93774	Protein pob1
O74653	POB1_SCHPO	856.88	2	SsPTDSISQNSGLPSR	0.003		439	454	44.3	2.5e-07	93774	Protein pob1
O74653	POB1_SCHPO	815.375	2	ITTIDGEsPSSISSR	0.076	ITTIDGEsPSSISSR	542	556	44.9	1.4e-06	93774	Protein pob1
O74653	POB1_SCHPO	928.421	2	LTEPISsPSTSSIDVDK	0		455	471	36.7	5e-06	93774	Protein pob1
O74653	POB1_SCHPO	528.237	2	VLsAEDSVR	0.097	VLsAEDSVR	192	200	34.5	7.3e-06	93774	Protein pob1
O74653	POB1_SCHPO	623.62	3	RsSPTDSISQNSGLPSR	0.004		438	454	50	1.1e-05	93774	Protein pob1
O74653	POB1_SCHPO	884.758	3	TPNDsSPLPYIENRPASSLAVSEK	0.002		220	243	38	1.5e-05	93774	Protein pob1
O74653	POB1_SCHPO	793.358	2	FDSNEPSATsPILK	0.007		424	437	38.5	4.6e-05	93774	Protein pob1
O74653	POB1_SCHPO	623.621	3	RSSPTDsISQNSGLPSR	0.002		438	454	46.8	5.1e-05	93774	Protein pob1
O74653	POB1_SCHPO	641.283	2	SsDELPLVEGR	0.017		17	27	31	8.2e-05	93774	Protein pob1
O74653	POB1_SCHPO	717.808	2	EDFSIStAEVTR	0		78	89	21.4	0.00078	93774	Protein pob1
O74653	POB1_SCHPO	884.754	3	TPNDSSPLPYIENRPASSLAVsEK	0.049	TPNDSSPLPYIENRPASSLAVsEK	220	243	29.5	0.00099	93774	Protein pob1
O74653	POB1_SCHPO	850.904	2	LPSSNLEQGSSSsVTK	0.005		557	572	29.9	0.0013	93774	Protein pob1
O74653	POB1_SCHPO	833.347	2	FDsNEPSAtSPILK			424	437	31.6	0.0017	93774	Protein pob1
O74653	POB1_SCHPO	911.403	3	TPNDSsPLPYIENRPASsLAVSEK			220	243	31.3	0.0019	93774	Protein pob1
O74653	POB1_SCHPO	911.409	3	TPNDSsPLPYIENRPASSLAVsEK			220	243	26.4	0.002	93774	Protein pob1
O74653	POB1_SCHPO	502.928	3	SVASsPLNKEPIGK	0		652	665	25.2	0.0053	93774	Protein pob1
O74653	POB1_SCHPO	911.429	3	tPNDSsPLPYIENRPASSLAVSEK			220	243	22.1	0.027	93774	Protein pob1
O74718	ERF2_SCHPO	612.314	2	VLsLGGNTSAPK	0.072	VLsLGGNTSAPK	118	129	35	1.1e-06	72557	Eukaryotic peptide chain release factor GTP-binding subunit
O74718	ERF2_SCHPO	723.829	2	ETAAPPPQEtPTK	0.006		173	185	47.8	3.2e-05	72557	Eukaryotic peptide chain release factor GTP-binding subunit
O74755	PST3_SCHPO	988.486	3	VGtPMHPLPQQGVQSTLPVAPSNEDQR	0.064	VGtPMHPLPQQGVQSTLPVAPSNEDQR	198	224	46.2	7.9e-07	132882	Paired amphipathic helix protein pst3
O74755	PST3_SCHPO	993.812	3	VGtPmHPLPQQGVQSTLPVAPSNEDQR	0.087	VGtPmHPLPQQGVQSTLPVAPSNEDQR	198	224	45.1	3.3e-06	132882	Paired amphipathic helix protein pst3
O74755	PST3_SCHPO	879.084	3	LFLPDNVDSTEPSTPNVQKsPNR	0.029	LFLPDNVDSTEPSTPNVQKsPNR	317	339	36.6	1.3e-05	132882	Paired amphipathic helix protein pst3
O74755	PST3_SCHPO	995.425	2	LSDAQLTNSsFYSYADK	0.004		726	742	35	5.4e-05	132882	Paired amphipathic helix protein pst3
O74755	PST3_SCHPO	727.677	3	LFLPDNVDSTEPStPNVQK	0.008		317	335	29.6	0.011	132882	Paired amphipathic helix protein pst3
O74757	O74757_SCHPO	654.325	3	SVIGNQSSPTGIPAsPNVR	0.268	SVIGNQSSPTGIPAsPNVR	353	371	31.4	1.2e-05	75657.2	Synoviolin homolog
O74760	EIF3A_SCHPO	725.824	2	ANIGASsPSPGAWR	0.001		869	882	28.6	5.3e-05	107072	Probable eukaryotic translation initiation factor 3 110 kDa subunit
O74762	RPN2_SCHPO	621.772	2	SQDIsINGNSK	0.009		865	875	38.4	1.3e-06	107277	26S proteasome regulatory subunit rpn2
O74762	RPN2_SCHPO	845.026	3	EAtPMEMDEEKSQDISINGNSK	0.068	EATPMEMDEEKsQDISINGNSK	854	875	33.3	0.00011	107277	26S proteasome regulatory subunit rpn2
O74763	O74763_SCHPO	926.439	2	NGDYTNAsPPVSAPLLR	0.017		259	275	41.7	1.1e-06	47743	WD repeat protein, human WDR68 family
O74763	O74763_SCHPO	926.435	2	NGDYTNASPPVsAPLLR	0.005		259	275	33	0.00038	47743	WD repeat protein, human WDR68 family
O74766	PUT2_SCHPO	927.946	2	VLESAASDsEIEVLAGGK	0.014		388	405	44.1	1.1e-06	60219.1	Probable delta-1-pyrroline-5-carboxylate dehydrogenase
O74766	PUT2_SCHPO	927.941	2	VLEsAASDSEIEVLAGGK	0.018		388	405	30.1	9.7e-05	60219.1	Probable delta-1-pyrroline-5-carboxylate dehydrogenase
O74766	PUT2_SCHPO	489.696	2	Acetyl-sQFAEFK	NA		1	8	28.7	0.00028	60219.1	Probable delta-1-pyrroline-5-carboxylate dehydrogenase
O74766	PUT2_SCHPO	661.663	3	KVLESAASDsEIEVLAGGK	0.003		387	405	35.3	0.00083	60219.1	Probable delta-1-pyrroline-5-carboxylate dehydrogenase
O74769	YO38_SCHPO	829.36	3	SIGVTENGNDsPEAFKNELDNR	0.032	SIGVTENGNDsPEAFKNELDNR	42	63	37.3	6.7e-06	40799.8	Putative protein SPBC24C6.08c
O74770	PHK_SCHPO	679.805	2	IFsPDELESNK	0.083	IFsPDELESNK	452	462	29.3	6.8e-05	92511.2	Probable phosphoketolase
O74770	PHK_SCHPO	918.394	2	Acetyl-ATQNDIPNStPEDLAK	0.008		1	17	22.4	0.0035	92511.2	Probable phosphoketolase
O74774	O74774_SCHPO	723.341	3	sKEALADAKDPLDESSNGIK	0.124	sKEALADAKDPLDESSNGIK	100	119	32.6	4.1e-05	66016.9	Elongation factor 1 alpha related protein
O74781	SYRC_SCHPO	813.415	2	SLsTLGLQDLPVFR	0.011		11	24	55.8	3.8e-10	70690.1	Probable arginyl-tRNA synthetase, cytoplasmic
O74781	SYRC_SCHPO	535.738	2	Acetyl-ATsVDQISK	0.003		1	10	25.5	0.0006	70690.1	Probable arginyl-tRNA synthetase, cytoplasmic
O74782	YGBA_SCHPO	597.28	3	SHSLVsPPPsPHFLK			93	107	33.7	2.6e-07	34082.2	Universal stress protein A family protein C25B2.10
O74788	IML1_SCHPO	599.639	3	KPPTFLKPNsPEYAK	0.09	KPPTFLKPNsPEYAK	729	743	27.6	4.9e-05	169996	Vacuolar membrane-associated protein iml1
O74788	IML1_SCHPO	599.641	3	KPPtFLKPNSPEYAK	0.011		729	743	24.7	0.0029	169996	Vacuolar membrane-associated protein iml1
O74803	RHP23_SCHPO	800.373	2	SAAsPAPNPPASVPEK	0.004		84	99	50.3	7.4e-08	40135.7	UV excision repair protein rhp23
O74803	RHP23_SCHPO	576.615	3	SAAsPAPNPPASVPEKK	0.038	SAAsPAPNPPASVPEKK	84	100	45.2	1.2e-07	40135.7	UV excision repair protein rhp23
O74828	O74828_SCHPO	804.999	3	TKDDEGEGsDVDLGFDDPFFK	0.03	TKDDEGEGsDVDLGFDDPFFK	498	518	43.7	1.5e-06	77754.7	RNA-binding protein
O74828	O74828_SCHPO	759.996	3	DIFTPADNQPSsAELHEAQK	0		237	256	28.7	0.00052	77754.7	RNA-binding protein
O74835	O74835_SCHPO	722.789	2	AIEYVSESHsEN	0.009		1679	1690	36	6e-07	187526	U3 snoRNP-associated protein Rrp5
O74839	O74839_SCHPO	467.894	3	sRSPIASVVSYR	0.011		96	107	28.8	0.00043	114271	MS ion channel protein 1
O74839	O74839_SCHPO	437.19	3	QLPHsPEHER	NA		86	95	22.6	0.0082	114271	MS ion channel protein 1
O74843	SIF1_SCHPO	656.961	3	INQILGQNSDDsQSDVR	0.028	INQILGQNSDDsQSDVR	27	43	35.4	2.6e-06	28868.8	Sad1-interacting factor 1
O74843	SIF1_SCHPO	818.706	3	EGsDTNFQGENEQIPQATAPLK	0.028	EGsDTNFQGENEQIPQATAPLK	130	151	34.5	0.00017	28868.8	Sad1-interacting factor 1
O74845	YCY9_SCHPO	679.303	2	GSGsPSSPVMPFK	0.002		134	146	36.2	4e-08	62759	Uncharacterized WD repeat-containing protein C1235.09
O74845	YCY9_SCHPO	687.303	2	GSGSPsSPVmPFK	0.004		134	146	35.2	2.8e-05	62759	Uncharacterized WD repeat-containing protein C1235.09
O74845	YCY9_SCHPO	534.245	3	GSGSPsSPVMPFKDK	0		134	148	30.9	2.9e-05	62759	Uncharacterized WD repeat-containing protein C1235.09
O74845	YCY9_SCHPO	679.308	2	GSGSPSsPVMPFK	0.049	GSGSPSsPVMPFK	134	146	31.3	0.00016	62759	Uncharacterized WD repeat-containing protein C1235.09
O74853	O74853_SCHPO	765.355	2	SIsPSSGSELPNFK	0.017		31	44	32.7	3.5e-06	121089	Shuttle craft like transcriptional regulator
O74853	O74853_SCHPO	765.348	2	SISPSSGsELPNFK	0.002		31	44	29.1	0.0019	121089	Shuttle craft like transcriptional regulator
O74863	TRM82_SCHPO	737.827	2	SVETGTSsPSVESK	0.004		406	419	49.7	8.8e-08	47498.5	tRNA
O74865	O74865_SCHPO	483.727	2	Acetyl-sETGIIPK	0.041	MsETGIIPK	1	9	24.5	0.00086	35033.9	WD repeat protein, human WRDR85 family
O74871	YCW3_SCHPO	763.846	2	QSVSNEVSsPDVAK	0.031	QSVSNEVSsPDVAK	131	144	34	0.00013	26781.4	Uncharacterized protein C31H12.03c
O74871	YCW3_SCHPO	755.33	2	qSVSNEVsSPDVAK	0.005		131	144	21.8	0.026	26781.4	Uncharacterized protein C31H12.03c
O74874	CCR4_SCHPO	682.284	3	LVsDDDDDVNDNVSTSVR	0.285	LVsDDDDDVNDNVSTSVR	300	317	42.3	8.7e-08	76456.9	Glucose-repressible alcohol dehydrogenase transcriptional effector
O74874	CCR4_SCHPO	518.569	3	LTSNMYNRVmtK	0.012		462	473	23	0.034	76456.9	Glucose-repressible alcohol dehydrogenase transcriptional effector
O74875	YJ83_SCHPO	962.463	2	NLSGVEsPISVTAEELAK	0.062	NLSGVEsPISVTAEELAK	62	79	48.8	8.9e-09	16336.8	Uncharacterized heme-binding protein C330.03c
O74879	O74879_SCHPO	623.267	3	GLTAAEEsEEEKEHTK	0.013		524	539	42.4	8.5e-06	72239.8	rRNA processing protein Enp2
O74883	O74883_SCHPO	755.285	2	Acetyl-sFSEDQAmEEAK	0.026	MsFSEDQAmEEAK	1	13	24.6	0.0023	27385.1	DNA-directed RNA polymerase III complex subunit Rpc37
O74884	RL24B_SCHPO	519.192	2	RAAsEsEK			116	123	17.2	0.045	16911.9	60S ribosomal protein L24-B
O74887	O74887_SCHPO	711.854	2	Acetyl-sLQIGKPAPDFK	NA		1	13	30.9	3.8e-05	21191.3	Thioredoxin peroxidase Tpx1
O74895	RL15A_SCHPO	517.573	3	FNNsPQHATWLR	0.151	FNNsPQHATWLR	180	191	32.6	9.8e-05	23806.6	60S ribosomal protein L15-A
O74904	RL35_SCHPO	631.971	3	KQsQENLAEQLQELR	NA		10	24	49.1	6.2e-06	14301.9	60S ribosomal protein L35
O74915	YJ74_SCHPO	675.292	3	SVVFsDHLTEPNDQEVK	0.003		132	148	27.4	0.0047	78425.9	Uncharacterized transcriptional regulatory protein C757.04
O74927	MTHR2_SCHPO	713.114	4	RLsLDEPAELHNQVVVPSQQPVADK	0.432	RLsLDEPAELHNQVVVPSQQPVADK	330	354	48.4	1.6e-08	72140.8	Methylenetetrahydrofolate reductase 2
O74942	O74942_SCHPO	659.98	3	Acetyl-mDGASPVDRDVsPVGLPK	0.05	mDGASPVDRDVsPVGLPK	1	19	39	2.6e-07	69048.7	Peptidyl-prolyl cis-trans isomerase
O74942	O74942_SCHPO	681.292	3	Acetyl-MDGAsPVDRDVsPVGLPK			1	19	42.1	1.1e-06	69048.7	Peptidyl-prolyl cis-trans isomerase
O74942	O74942_SCHPO	981.441	2	Acetyl-MDGASPVDRDVsPVGLPK	0.009		1	19	41.3	1.3e-06	69048.7	Peptidyl-prolyl cis-trans isomerase
O74942	O74942_SCHPO	496.239	2	DVsPVGLPK	NA		11	19	32	2.3e-05	69048.7	Peptidyl-prolyl cis-trans isomerase
O74949	YJBC_SCHPO	547.543	3	Acetyl-sDSFDAAASHFHAR	0.05	MsDSFDAAASHFHAR	1	15	36.5	4.7e-05	60569.3	Uncharacterized protein C553.12c
O74958	O74958_SCHPO	633.799	2	AStPPPLNFSR	0.005		310	320	47.9	2e-06	48703.4	Conserved protein
O74958	O74958_SCHPO	446.183	3	sSPQLSHEDTR	0.002		230	240	26.3	0.0001	48703.4	Conserved protein
O74958	O74958_SCHPO	424.204	2	TLsPPPR	0.055	TLsPPPR	176	182	24.1	0.00035	48703.4	Conserved protein
O74960	SLBR2_SCHPO	634.311	3	APTAsQLLNPPPPSSSTR	0.01		13	30	47.6	9.4e-08	39806	Probable sphingolipid long chain base-responsive protein C736.15
O74960	SLBR2_SCHPO	634.32	3	APTASQLLNPPPPSSStR	0.019		13	30	42.9	1.4e-07	39806	Probable sphingolipid long chain base-responsive protein C736.15
O74960	SLBR2_SCHPO	780.027	3	NsRAPTAsQLLNPPPPSSSTR			10	30	39.5	9.2e-05	39806	Probable sphingolipid long chain base-responsive protein C736.15
O74960	SLBR2_SCHPO	753.372	3	NsRAPTASQLLNPPPPSSSTR	0		10	30	38.5	0.00026	39806	Probable sphingolipid long chain base-responsive protein C736.15
O74964	RSC1_SCHPO	728.307	2	NPEYSVsPPNGSK	0.054	NPEYSVsPPNGSK	145	157	33.5	3.2e-05	90133	Chromatin structure-remodeling complex protein rsc1
O74964	RSC1_SCHPO	410.705	2	AsPQLPK	NA		333	339	20	0.00076	90133	Chromatin structure-remodeling complex protein rsc1
O74964	RSC1_SCHPO	546.192	2	KtSSHsER			577	584	17.5	0.045	90133	Chromatin structure-remodeling complex protein rsc1
O74968	O74968_SCHPO	691.628	3	Acetyl-MDPQTNSHQEVQQPsPK	0.031	MDPQTNSHQEVQQPsPK	1	17	36.4	6.5e-07	28339.7	U1 snRNP-associated protein Usp102
O74968	O74968_SCHPO	696.968	3	Acetyl-mDPQTNSHQEVQQPsPK	0.044	mDPQTNSHQEVQQPsPK	1	17	32.1	2.3e-06	28339.7	U1 snRNP-associated protein Usp102
O74969	GHT2_SCHPO	574.244	2	GEsVEYVER	0.304	GEsVEYVER	505	513	40.5	3.4e-07	58846.5	High-affinity glucose transporter ght2
O74975	O74975_SCHPO	665.636	3	SLEEISQSVsPVEEEPR	0.027	SLEEISQSVsPVEEEPR	54	70	58.8	6.4e-08	40875.2	Cholinephosphate cytidylyltransferase
O74975	O74975_SCHPO	692.286	3	SLEEIsQSVsPVEEEPR			54	70	40.6	1.1e-06	40875.2	Cholinephosphate cytidylyltransferase
O74975	O74975_SCHPO	571.232	2	SSsHYDLPR	0.004		329	337	38.5	3.7e-06	40875.2	Cholinephosphate cytidylyltransferase
O74975	O74975_SCHPO	679.813	2	TEGVsTSDLITR	0.002		214	225	39.2	4.2e-06	40875.2	Cholinephosphate cytidylyltransferase
O74975	O74975_SCHPO	433.192	3	RSsSHYDLPR	0.006		328	337	35.5	0.00013	40875.2	Cholinephosphate cytidylyltransferase
O74976	FAT2_SCHPO	711.842	2	SCsSPLAPPVLSK	0.006		281	293	32.4	7.8e-06	56274.8	Putative peroxisomal-coenzyme A synthetase
O74986	MUG38_SCHPO	460.891	3	ARsPEDMILLR	NA		163	173	29.6	0.00016	32210	Meiotically up-regulated gene 38 protein
O75000	RL12_SCHPO	481.259	2	IGPLGLsPK	NA		32	40	37.4	7.3e-06	17666.6	60S ribosomal protein L12
O75005	SYV_SCHPO	643.303	2	IAsPVAEYVEK	0.138	IAsPVAEYVEK	67	77	35.1	6.7e-07	111318	Probable valyl-tRNA synthetase, mitochondrial precursor
O75005	SYV_SCHPO	639.819	2	VLQDLDsPALK	NA		85	95	40.2	1e-05	111318	Probable valyl-tRNA synthetase, mitochondrial precursor
O75011	NAK1_SCHPO	742.687	3	SIsPSILHKPSLESASStPK			539	558	24.5	0.014	71120.9	Serine/threonine-protein kinase nak1
O94246	GSH0_SCHPO	562.3	2	IKsNLELVK	NA		30	38	27.1	0.0021	32660.6	Putative glutamate--cysteine ligase regulatory subunit
O94255	CAN_SCHPO	621.273	2	EASTAsPVSGAGK	0.053	EASTAsPVSGAGK	22	34	43.3	3.5e-08	27535.6	Carbonic anhydrase
O94255	CAN_SCHPO	751.612	4	RIEEIDHQDEIIDREASTAsPVSGAGK	0.041	RIEEIDHQDEIIDREASTAsPVSGAGK	8	34	27.8	0.0047	27535.6	Carbonic anhydrase
O94260	G3BP_SCHPO	779.02	3	DVASEPYVNGVQsQEHLPSAK	0.026	DVASEPYVNGVQsQEHLPSAK	155	175	50.5	6.1e-10	47972.6	Putative G3BP-like protein
O94260	G3BP_SCHPO	821.727	3	KDVASEPYVNGVQsQEHLPSAK	0.041	KDVASEPYVNGVQsQEHLPSAK	154	175	44	1.6e-06	47972.6	Putative G3BP-like protein
O94260	G3BP_SCHPO	779.032	3	DVASEPyVNGVQSQEHLPSAK	0.02		155	175	34.5	4.7e-06	47972.6	Putative G3BP-like protein
O94267	SPT16_SCHPO	604.638	3	FAQGSVPSsGIEKPTVK	0.005		504	520	37.1	2.2e-05	116452	FACT complex subunit spt16
O94267	SPT16_SCHPO	871.373	3	AQGDISYFFGEDDSsLEDGVKPR	0		431	453	28.9	7.2e-05	116452	FACT complex subunit spt16
O94277	PABS_SCHPO	628.789	2	SFPPGsMTGAPK	0.003		615	626	23.1	0.0083	80599.2	Putative aminodeoxychorismate synthase
O94283	O94283_SCHPO	709.315	2	STsEADmLGLLGK	0.009		317	329	45.8	1.1e-08	37610.1	COPII-coated vesicle component Erv41
O94283	O94283_SCHPO	701.312	2	STsEADMLGLLGK	0.007		317	329	47	7.6e-08	37610.1	COPII-coated vesicle component Erv41
O94290	O94290_SCHPO	840.41	2	TIIQNEVEQTLsPK	0.04	TIIQNEVEQTLsPK	149	162	48.4	2e-08	25310.2	RNA-binding protein Cwf29
O94290	O94290_SCHPO	684.664	3	TIIQNEVEQTLsPKDEK	0.015		149	165	27.2	0.014	25310.2	RNA-binding protein Cwf29
O94294	SOG2_SCHPO	577.776	2	TAPTQLSAsAK	0.008		392	402	48.4	1.1e-06	96994.1	Leucine-rich repeat-containing protein sog2
O94294	SOG2_SCHPO	511.723	2	FHLDAsPR	NA		296	303	35.8	1.9e-06	96994.1	Leucine-rich repeat-containing protein sog2
O94294	SOG2_SCHPO	722.684	3	HYTESSLATPVPLmsPIAR	0.25	HYTESSLATPVPLmsPIAR	815	833	50.7	2.8e-06	96994.1	Leucine-rich repeat-containing protein sog2
O94294	SOG2_SCHPO	448.872	3	IFAQDPHPsPR	NA		456	466	38.8	9.8e-06	96994.1	Leucine-rich repeat-containing protein sog2
O94294	SOG2_SCHPO	508.218	2	QsPTSmIR	0.125	QsPTSmIR	647	654	24.5	0.00019	96994.1	Leucine-rich repeat-containing protein sog2
O94294	SOG2_SCHPO	500.218	2	QsPTSMIR	0.053	QsPTSMIR	647	654	22	0.0022	96994.1	Leucine-rich repeat-containing protein sog2
O94296	O94296_SCHPO	759.985	3	RIsRDEDEDEFAGESMVGR	0.1	RISRDEDEDEFAGEsMVGR	13	31	32.5	0.00015	142380	P-type ATPase
O94296	O94296_SCHPO	765.324	3	RIsRDEDEDEFAGESmVGR	0.057	RIsRDEDEDEFAGESmVGR	13	31	28.3	0.00039	142380	P-type ATPase
O94303	HIS5_SCHPO	471.738	2	tAIETISK	0.096	TAIETIsK	377	384	17.4	0.018	59400.1	Imidazole glycerol phosphate synthase hisHF
O94305	YJI5_SCHPO	899.673	4	SEQETAVEHPKPTATTSAPSAsPTGVPVEEESHK	0.003		282	315	40.9	4.7e-07	41623.9	Probable serine hydrolase C5E4.05c
O94305	YJI5_SCHPO	781.038	3	ATsDAVPPAEAKPEPVPASAAER	0.007		316	338	28.8	0.00037	41623.9	Probable serine hydrolase C5E4.05c
O94305	YJI5_SCHPO	667.315	3	APTSEStTVPETIVASTTK	0		339	357	33.5	0.0012	41623.9	Probable serine hydrolase C5E4.05c
O94311	O94311_SCHPO	621.939	3	ELSPNtDNQNTPAGPTK	0.041	ELsPNTDNQNTPAGPTK	81	97	30.2	0.00029	20319.3	LYHRT homolog
O94315	YH5B_SCHPO	784.89	2	STsQIALSWVLQR	0.004		239	251	43.2	5.2e-07	33922.3	Uncharacterized oxidoreductase C215.11c
O94315	YH5B_SCHPO	772.316	2	TAASsAVDASQAGTVK	0.011		4	19	22.7	0.038	33922.3	Uncharacterized oxidoreductase C215.11c
O94321	MPR1_SCHPO	517.24	3	ARsPSGSAIPHAYR	0.018		45	58	34.2	0.0002	32550.5	Multistep phosphorelay regulator 1
O94321	MPR1_SCHPO	441.538	3	sPSGSAIPHAYR	0		47	58	28.2	0.00021	32550.5	Multistep phosphorelay regulator 1
O94326	O94326_SCHPO	508.551	3	SQsPPGEQSAYHR	0.034	SQsPPGEQSAYHR	28	40	46.1	5.5e-08	70865.2	Transcription factor
O94326	O94326_SCHPO	508.545	3	SQSPPGEQsAYHR	0.058	SQsPPGEQSAYHR	28	40	18	0.03	70865.2	Transcription factor
O94358	YHOA_SCHPO	826.057	3	ELsPQATLNSPIQSAEAGNVELK	0.023	ELsPQATLNSPIQSAEAGNVELK	383	405	50	4.3e-07	82579.4	Uncharacterized protein C428.10
O94358	YHOA_SCHPO	794.334	3	ASYNQDsSPNASLEQCFVQR	0		599	618	36.8	5.3e-05	82579.4	Uncharacterized protein C428.10
O94378	YG0C_SCHPO	951.408	2	VDVsSPPSTAPGsAGSTPK			66	84	43.2	5.7e-10	93286.4	Uncharacterized protein C1604.12
O94378	YG0C_SCHPO	911.433	2	VDVSsPPSTAPGSAGSTPK	0.004		66	84	48.8	4.8e-09	93286.4	Uncharacterized protein C1604.12
O94378	YG0C_SCHPO	951.417	2	VDVsSPPSTAPGSAGsTPK			66	84	41.9	3.5e-08	93286.4	Uncharacterized protein C1604.12
O94378	YG0C_SCHPO	651.622	3	HFQDSGTPVSEEVsPTR	0.021	HFQDSGTPVSEEVsPTR	290	306	40.1	7.4e-07	93286.4	Uncharacterized protein C1604.12
O94378	YG0C_SCHPO	875.394	3	GLDTSSSLSSSSHPsHEALSTIDTK	0.002		233	257	37.9	2.2e-06	93286.4	Uncharacterized protein C1604.12
O94378	YG0C_SCHPO	852.406	3	LASNPTSIGTSsPESIDNNSNNKK	0		171	194	33.4	1.6e-05	93286.4	Uncharacterized protein C1604.12
O94378	YG0C_SCHPO	948.091	3	HFQDSGTPVSEEVsPTRLPsPTSAR			290	314	32.4	2.7e-05	93286.4	Uncharacterized protein C1604.12
O94378	YG0C_SCHPO	454.715	2	LPsPTSAR	0.149	LPsPTSAR	307	314	34	6.6e-05	93286.4	Uncharacterized protein C1604.12
O94378	YG0C_SCHPO	691.323	4	HFQDSGTPVSEEVSPTRLPsPTSAR	0.008		290	314	35.1	0.0001	93286.4	Uncharacterized protein C1604.12
O94378	YG0C_SCHPO	665.282	2	MNSsPTITNER	0.008		552	562	35.6	0.002	93286.4	Uncharacterized protein C1604.12
O94388	O94388_SCHPO	710.963	3	SSEDSsNSVEFVGDPPLER	0.005		348	366	23.5	0.0089	45297.6	Guanyl-nucleotide exchange factor Vps902
O94394	YQF1_SCHPO	946.397	3	VWDLEYSADNNEADDHPsLGPPSTK	0.07	VWDLEYSADNNEADDHPsLGPPSTK	330	354	36.9	3.2e-06	42031.4	Uncharacterized WD repeat-containing protein C126.01c
O94399	TWF1_SCHPO	674.323	3	EILHAAGISsPQAETSTTK	0		298	316	36.3	1.1e-05	36781.2	Twinfilin
O94402	O94402_SCHPO	494.214	3	HSSDsVHEYLVK	0.02		219	230	27.3	0.0014	46375.9	Vacuolar membrane zinc transporter
O94402	O94402_SCHPO	494.22	3	HsSDSVHEYLVK	0.006		219	230	20.4	0.0046	46375.9	Vacuolar membrane zinc transporter
O94416	T2FA_SCHPO	491.236	2	TPsSVSPVK	0.028	TPsSVSPVK	397	405	40.4	1.8e-07	55949.6	Transcription initiation factor IIF subunit alpha
O94419	O94419_SCHPO	768.995	3	EISLDYSsPSLQQTEEQDR	0.01		3	21	46.7	4.7e-05	68130.9	GTPase activating protein
O94432	YHKF_SCHPO	795.111	4	KVESASGNQETSNVtPTKENEGYEELEK	0.025	KVESASGNQETSNVtPTKENEGYEELEK	23	50	35.1	0.00064	52818.7	Uncharacterized RNA-binding protein C660.15
O94432	YHKF_SCHPO	795.105	4	KVESASGNQETsNVTPTKENEGYEELEK	0.025	KVESASGNQETSNVtPTKENEGYEELEK	23	50	32.6	0.00066	52818.7	Uncharacterized RNA-binding protein C660.15
O94432	YHKF_SCHPO	795.108	4	KVEsASGNQETSNVTPTKENEGYEELEK	0.01		23	50	32.7	0.01	52818.7	Uncharacterized RNA-binding protein C660.15
O94435	MUG35_SCHPO	549.574	3	RDsSGDLTSTDKER	0.006		125	138	50.3	2.3e-08	27521.3	Meiotically up-regulated gene 35 protein
O94435	MUG35_SCHPO	935.144	4	DVsPVSHSEKPYWDRyDLDQPSNQDVEESR			139	168	43.4	7e-07	27521.3	Meiotically up-regulated gene 35 protein
O94435	MUG35_SCHPO	915.154	4	DVsPVSHSEKPYWDRYDLDQPSNQDVEESR	0.009		139	168	45.2	4.2e-06	27521.3	Meiotically up-regulated gene 35 protein
O94435	MUG35_SCHPO	497.538	3	DsSGDLTSTDKER	0.017		126	138	38.6	5.2e-06	27521.3	Meiotically up-regulated gene 35 protein
O94435	MUG35_SCHPO	937.893	2	YDLDQPsNQDVEESR	0.154	YDLDQPsNQDVEESR	154	168	48.4	1.3e-05	27521.3	Meiotically up-regulated gene 35 protein
O94435	MUG35_SCHPO	915.147	4	DVSPVSHsEKPYWDRYDLDQPSNQDVEESR	0.013		139	168	44.9	1.8e-05	27521.3	Meiotically up-regulated gene 35 protein
O94435	MUG35_SCHPO	627.938	3	DVsPVSHSEKPYWDR	0.082	DVsPVSHSEKPYWDR	139	153	26.4	0.0002	27521.3	Meiotically up-regulated gene 35 protein
O94435	MUG35_SCHPO	654.6	3	DVsPVSHsEKPYWDR			139	153	19.3	0.014	27521.3	Meiotically up-regulated gene 35 protein
O94438	RS3B_SCHPO	535.919	3	LLELHGEsQDVGTK	0.009		228	241	28.8	0.0025	28521.5	40S ribosomal protein S3aE-B
O94438	RS3B_SCHPO	455.193	2	DVAPLEsV	NA		245	252	20.8	0.0027	28521.5	40S ribosomal protein S3aE-B
O94441	O94441_SCHPO	815.886	2	DVENEKGsILGFSR	0.133	DVENEKGsILGFSR	657	670	64.1	4.1e-11	98308.3	Cargo-transport protein Ypp1
O94441	O94441_SCHPO	758.326	2	EGsSDELSTLLER	0.007		630	642	34.7	1.2e-05	98308.3	Cargo-transport protein Ypp1
O94441	O94441_SCHPO	615.29	3	ISKEGsSDELSTLLER	0.026	ISKEGsSDELSTLLER	627	642	33.8	0.00015	98308.3	Cargo-transport protein Ypp1
O94441	O94441_SCHPO	758.323	2	EGSSDELsTLLER	0.006		630	642	30.7	0.00098	98308.3	Cargo-transport protein Ypp1
O94441	O94441_SCHPO	458.716	2	GSILGFsR	0.161	GSILGFsR	663	670	21.7	0.0053	98308.3	Cargo-transport protein Ypp1
O94451	PLI1_SCHPO	804.881	2	NVQsPNIDTAISNR	0.162	NVQsPNIDTAISNR	479	492	48.1	1.4e-08	80723.9	E3 SUMO-protein ligase pli1
O94462	O94462_SCHPO	694.338	3	SEsTSSSLSGLHSDLRPLK	0.031	SEsTSSSLSGLHSDLRPLK	154	172	33.2	5.2e-07	81069.3	RNA-binding protein Puf3
O94464	O94464_SCHPO	651.302	3	AQNAIDFNVTNTHsPSR	0.003		619	635	58.7	6.5e-10	83303.5	Conserved eukaryotic protein
O94466	RGA7_SCHPO	701.326	3	AASPFRPTSVsPQPSsPTK			482	500	35	3.8e-07	76679.8	Probable Rho-GTPase-activating protein 7
O94466	RGA7_SCHPO	674.659	3	AASPFRPTSVSPQPSsPTK	0		482	500	44	8.3e-07	76679.8	Probable Rho-GTPase-activating protein 7
O94466	RGA7_SCHPO	674.668	3	AAsPFRPTSVSPQPSSPTK	0.028	AAsPFRPTSVSPQPSSPTK	482	500	39.1	0.00019	76679.8	Probable Rho-GTPase-activating protein 7
O94467	O94467_SCHPO	673.303	3	tIVNEGAENVGYFTPAQK	0.089	tIVNEGAENVGYFTPAQK	1	19	30.3	0.00052	43683.9	NADH-dependent flavin oxidoreductase
O94477	MYO52_SCHPO	657.971	3	ILNSASSIEQSRNsEEK	0.022	ILNSASSIEQSRNsEEK	1059	1075	59.3	2.6e-08	175157	Myosin-52
O94477	MYO52_SCHPO	692.838	2	ILNSASsIEQSR	0		1059	1070	38.5	7.5e-05	175157	Myosin-52
O94486	CHR2_SCHPO	528.61	3	NLsPFKELEIVSK	0.142	NLsPFKELEIVSK	80	92	34.7	2.8e-05	58421.4	Chitin synthase regulatory factor 2
O94486	CHR2_SCHPO	615.264	2	TSITIsNEER	0.013		471	480	21	0.017	58421.4	Chitin synthase regulatory factor 2
O94488	O94488_SCHPO	768.878	2	LLGAGSTSSIPNsPR	0.136	LLGAGSTSSIPNsPR	997	1011	51.5	4.3e-09	128470	MT organizer Mto1
O94488	O94488_SCHPO	861.389	3	LHQNATAPTSStPLQsPDESVNK			79	101	40.9	2.5e-07	128470	MT organizer Mto1
O94489	EF3_SCHPO	725.288	2	FQsGEDLEAMDK	NA		766	777	25	0.0026	115803	Elongation factor 3
O94489	EF3_SCHPO	564.232	2	AGLEVsDDEL	NA		1038	1047	19.9	0.0036	115803	Elongation factor 3
O94489	EF3_SCHPO	628.268	2	KAGLEVsDDEL	NA		1037	1047	24.7	0.0055	115803	Elongation factor 3
O94497	YBS7_SCHPO	661.296	2	ASsNLsLASLAK			147	158	35.6	5.4e-07	65329.7	Uncharacterized serine-rich protein C18E5.07
O94497	YBS7_SCHPO	514.229	2	GAsLEDLSR	0.362	GAsLEDLSR	210	218	39.7	6.8e-07	65329.7	Uncharacterized serine-rich protein C18E5.07
O94497	YBS7_SCHPO	621.309	2	ASsNLSLASLAK	0.003		147	158	39.4	1.8e-06	65329.7	Uncharacterized serine-rich protein C18E5.07
O94497	YBS7_SCHPO	871.369	3	SDPVtDVDESQTIDEQSIPEAEK	0.004		293	315	41.5	6.5e-06	65329.7	Uncharacterized serine-rich protein C18E5.07
O94497	YBS7_SCHPO	921.427	2	TsGSSTGLSNAPPSANVSK	0.004		128	146	40.5	7.3e-06	65329.7	Uncharacterized serine-rich protein C18E5.07
O94497	YBS7_SCHPO	739.667	3	QRsTADLTESDNICGLTAGK	0.005		273	292	35.2	1.8e-05	65329.7	Uncharacterized serine-rich protein C18E5.07
O94497	YBS7_SCHPO	966.923	2	StADLTESDNICGLTAGK	0.004		275	292	34.7	1.9e-05	65329.7	Uncharacterized serine-rich protein C18E5.07
O94497	YBS7_SCHPO	733.995	3	qRsTADLTESDNICGLTAGK	0.008		273	292	37.4	4.7e-05	65329.7	Uncharacterized serine-rich protein C18E5.07
O94497	YBS7_SCHPO	619.616	3	SPSGTKsPASGETSEAGVK	0.023	SPSGTKsPASGETSEAGVK	510	528	30.8	0.00026	65329.7	Uncharacterized serine-rich protein C18E5.07
O94513	EIF3E_SCHPO	880.914	2	sLSFESQNLEQSLAK	0.023	sLSFESQNLEQSLAK	477	491	47.7	4e-07	57114.7	Eukaryotic translation initiation factor 3 subunit E
O94513	EIF3E_SCHPO	663.987	3	TKsLSFESQNLEQSLAK	0.015		475	491	31.4	0.00023	57114.7	Eukaryotic translation initiation factor 3 subunit E
O94519	SPF30_SCHPO	904.897	2	AISVASMSTsPSNYASR	0.007		164	180	48.6	8.7e-09	34626.3	Splicing factor spf30
O94519	SPF30_SCHPO	912.906	2	AISVASmSTsPSNYASR	0.011		164	180	49.2	6.7e-08	34626.3	Splicing factor spf30
O94519	SPF30_SCHPO	912.906	2	AISVAsmSTSPSNYASR	0.008		164	180	34	6.9e-05	34626.3	Splicing factor spf30
O94524	O94524_SCHPO	699.284	2	Acetyl-sNTHITDWSSK	0.004		1	12	36.6	6.7e-06	37056.1	Glutathione S-transferase Gst3
O94528	CAF5_SCHPO	528.258	3	IHEVNsEGHIIVR	NA		52	64	39.6	8.5e-08	59141.2	Caffeine resistance protein 5
O94534	ALP14_SCHPO	694.357	2	SVVPSsPVVPSPR	0.008		538	550	41.4	4.9e-06	89446.4	Spindle pole body component alp14
O94535	O94535_SCHPO	846.389	2	qSLASPsEASLPNLSK	0.029	qSLASPsEASLPNLSK	396	411	46.7	1.4e-07	55508.4	Conserved fungal protein
O94548	O94548_SCHPO	779.701	3	TVNEINKsQEFQEHVETPK	0.096	TVNEINKsQEFQEHVETPK	115	133	30.9	0.00035	50886.7	Conserved fungal protein
O94563	O94563_SCHPO	997.891	2	EAEEsDDELLNYTVCK	0.192	EAEEsDDELLNYTVCK	156	171	30.7	0.00012	37806.3	Flavonol reductase/cinnamoyl-CoA reductase family
O94564	O94564_SCHPO	589.786	2	TPQWAsPALK	0.106	TPQWAsPALK	219	228	28.6	2.9e-05	37321.1	Alcohol dehydrogenase
O94582	TRPE_SCHPO	664.32	2	SIFPAGTVSGsPK	0.003		382	394	44.3	1.3e-06	54960.1	Probable anthranilate synthase component 1
O94589	YC93_SCHPO	715.817	2	SELSAsPGSVSSSR	0.021	SELSAsPGSVSSSR	436	449	59.4	5.1e-09	61285	RanBD1 domain-containing protein C584.03c
O94589	YC93_SCHPO	463.717	2	HSIsFAGK	0.054	HSIsFAGK	22	29	27.1	0.00012	61285	RanBD1 domain-containing protein C584.03c
O94599	O94599_SCHPO	952.449	2	LESYSLPSSSIsLNNGR	0.002		249	265	41.7	2.9e-06	64826.7	LMBR1-like membrane protein
O94601	O94601_SCHPO	908.729	3	GTYDAEIDSPYSALAAsPPPEDYSK	0.021	GTYDAEIDSPYSALAAsPPPEDYSK	278	302	52.1	1.1e-08	34188.9	GTPase activating protein
O94601	O94601_SCHPO	742.358	3	SVSSHASVTSSStVPTIPSVSK	0		127	148	28.4	0.00058	34188.9	GTPase activating protein
O94601	O94601_SCHPO	769.018	3	SVsSHASVTSsSTVPTIPSVSK			127	148	23.5	0.018	34188.9	GTPase activating protein
O94601	O94601_SCHPO	769.017	3	SVSsHAsVTSSSTVPTIPSVSK			127	148	25.9	0.02	34188.9	GTPase activating protein
O94607	STR2_SCHPO	615.28	2	TSELsLEGVSK	0.044	TSELsLEGVSK	42	52	32.4	4.4e-05	66122.7	Siderophore iron transporter 2
O94609	UBA1_SCHPO	535.255	3	RAPtPLSFDIHNR	0.065	RAPtPLSFDIHNR	707	719	26.4	0.0012	112950	Ubiquitin-activating enzyme E1 1
O94619	YBKA_SCHPO	757.836	2	StDTPTEATTSPVK	0.005		509	522	42.4	3.7e-06	81159.3	LisH domain-containing protein C1289.10c
O94628	O94628_SCHPO	816.356	2	Acetyl-sDIVYANVSHYNK	0.094	MsDIVYANVSHYNK	1	14	38.2	1.1e-06	31710.2	Hexaprenyldihydroxybenzoate methyltransferase
O94640	SIR2_SCHPO	989.914	2	Acetyl-ASNPLDNNMPTtPVEEK	0		1	18	41.8	1.3e-05	53442.9	NAD-dependent histone deacetylase sir2
O94641	O94641_SCHPO	499.249	2	tSIAEGLAR	0.014		216	224	17.4	0.045	100508	Heat shock protein Hsp104
O94651	PEP12_SCHPO	586.749	2	Acetyl-sFVDLEQGR	NA		1	10	33.2	0.00046	36291.8	Syntaxin pep12
O94653	BMS1_SCHPO	639.784	2	IFYDESLsPK	0.003		516	525	35.5	4.3e-06	127646	Ribosome biogenesis protein BMS1 homolog
O94653	BMS1_SCHPO	676.601	3	SSESDLVVsDDEEDFFK	0.001		538	554	25.7	0.0077	127646	Ribosome biogenesis protein BMS1 homolog
O94658	RL36B_SCHPO	721.344	2	IEELTSVIQsSR	0.015		85	96	38	3.3e-06	11258.4	60S ribosomal protein L36-B
O94659	NOG1_SCHPO	862.331	3	EGYYDsDQEIEDADEEEVLEK	0.005		466	486	43.4	3.1e-05	72799.9	Probable nucleolar GTP-binding protein 1
O94659	NOG1_SCHPO	862.337	3	EGYyDSDQEIEDADEEEVLEK	0.005		466	486	37.3	0.00031	72799.9	Probable nucleolar GTP-binding protein 1
O94667	O94667_SCHPO	491.216	2	ASSPDLsPK	0.258	ASSPDLsPK	500	508	35	8.2e-05	63680.3	RNA polymerase II associated Paf1 complex
O94671	DHOM_SCHPO	552.75	2	GTAsFSDIVK	0.008		198	207	26.5	0.00092	40037.7	Probable homoserine dehydrogenase
O94671	DHOM_SCHPO	616.809	2	KGTASFsDIVK	0.011		197	207	22.2	0.0054	40037.7	Probable homoserine dehydrogenase
O94685	UCP8_SCHPO	869.898	2	YSsPPQTIDPQANIK	0.005		279	293	42.1	8.8e-07	97847	UBA domain-containing protein 8
O94685	UCP8_SCHPO	970.953	4	SETPAmNTNIEQGVTQPSLVNTEQLSHQQsISSTK	0.001		224	258	36.4	4e-06	97847	UBA domain-containing protein 8
O94685	UCP8_SCHPO	712.795	2	SsSETADFTPFR	0.006		111	122	37.8	1.1e-05	97847	UBA domain-containing protein 8
O94685	UCP8_SCHPO	640.305	3	TsIHIAPENISAIEESK	0.006		547	563	28.6	0.0011	97847	UBA domain-containing protein 8
O94685	UCP8_SCHPO	416.185	2	sFEQIK	NA		541	546	20.5	0.0095	97847	UBA domain-containing protein 8
O94691	JMJ3_SCHPO	821.854	2	sSVADLEEDVLETR	0.006		667	680	38.6	1.2e-05	84930.4	Lid2 complex component jmj3
O94695	O94695_SCHPO	793.333	2	SYPSSGTQsPFYGK	0.005		329	342	32.5	8.6e-05	48604.8	Triose phosphate transporter
O94704	YC54_SCHPO	829.872	2	GIsPSSAQSSAAVSSSR	0.037	GIsPSSAQSSAAVSSSR	133	149	54.7	2.2e-09	18765.6	Uncharacterized protein C1259.04
O94722	CTR4_SCHPO	725.312	4	TIVQVADEKHEHDSSQYSDTtPTTE	0.007		265	289	28.1	0.00018	32020.2	Copper transport protein ctr4
O94733	YQ61_SCHPO	683.604	3	qFCNVVGYDmPtPGEQK	0.099	qFCNVVGYDmPtPGEQK	128	144	37.1	6.1e-07	20178.7	Uncharacterized protein C191.01
O94733	YQ61_SCHPO	689.282	3	QFCNVVGYDmPtPGEQK	0.113	QFCNVVGYDmPtPGEQK	128	144	38.1	1.3e-05	20178.7	Uncharacterized protein C191.01
O94733	YQ61_SCHPO	678.279	3	qFCNVVGYDMPtPGEQK	0.153	qFCNVVGYDMPtPGEQK	128	144	32.2	3.7e-05	20178.7	Uncharacterized protein C191.01
O94733	YQ61_SCHPO	704.925	3	qFCNVVGyDMPtPGEQK			128	144	32	0.00023	20178.7	Uncharacterized protein C191.01
O94733	YQ61_SCHPO	683.958	3	QFCNVVGYDMPtPGEQK	0.126	QFCNVVGYDMPtPGEQK	128	144	29.8	0.0014	20178.7	Uncharacterized protein C191.01
O94733	YQ61_SCHPO	683.605	3	qFCNVVGyDmPTPGEQK	0.08	qFCNVVGYDmPtPGEQK	128	144	27	0.002	20178.7	Uncharacterized protein C191.01
O94740	CDC37_SCHPO	833.688	3	NPVNENEsEDEEGLSLSEDGKK	0.212	NPVNENEsEDEEGLSLSEDGKK	231	252	45.1	8.3e-08	52554.5	Hsp90 co-chaperone Cdc37
O94740	CDC37_SCHPO	833.689	3	NPVNENESEDEEGLsLSEDGKK	0.177	NPVNENEsEDEEGLSLSEDGKK	231	252	32.2	0.00053	52554.5	Hsp90 co-chaperone Cdc37
O94740	CDC37_SCHPO	790.984	3	NPVNENEsEDEEGLSLSEDGK	0.115	NPVNENEsEDEEGLSLSEDGK	231	251	26.7	0.003	52554.5	Hsp90 co-chaperone Cdc37
O94751	BUB1_SCHPO	696.647	3	sPQYSTVDSNSVLSPAMPK	0.014		545	563	34.8	0.00013	118354	Checkpoint serine/threonine-protein kinase bub1
P00332	ADH_SCHPO	737.832	2	IDsIEALEYVSR	0.317	IDsIEALEYVSR	302	313	41	4.6e-09	37396.7	Alcohol dehydrogenase
P00332	ADH_SCHPO	551.608	3	VVAIDtGDDKAELVK	NA		200	214	42.9	2.2e-06	37396.7	Alcohol dehydrogenase
P00332	ADH_SCHPO	434.227	2	IVLDLsK	NA		344	350	18.2	0.024	37396.7	Alcohol dehydrogenase
P01129	CDC10_SCHPO	899.913	2	SNNYLSTsPPILEQR	0.006		245	259	22.2	0.0042	85513.6	Start control protein cdc10
P04551	CDC2_SCHPO	633.3	2	IGEGTyGVVYK	0.043	IGEGTyGVVYK	10	20	32.4	0.01	34358.8	Cell division control protein 2
P05933	CALM_SCHPO	998.889	2	EADtDGDGVINYEEFSR	0.16	EADtDGDGVINYEEFSR	129	145	30.4	0.00064	16905.7	Calmodulin
P06652	MPIP_SCHPO	750.35	2	SLsCTVETPLANK	0.014		97	109	37.1	5e-05	66566.6	M-phase inducer phosphatase
P06652	MPIP_SCHPO	632.779	2	TQsMFLNSTR	0.023	TQsMFLNSTR	357	366	23.1	0.0019	66566.6	M-phase inducer phosphatase
P06652	MPIP_SCHPO	563.268	2	SsGNAPPFLR	0.001		192	201	23	0.022	66566.6	M-phase inducer phosphatase
P07527	WEE1_SCHPO	672.654	3	ENTPTNHNsIPTIQLEK	0.028	ENtPTNHNSIPTIQLEK	442	458	26.7	0.0095	96262.1	Mitosis inhibitor protein kinase wee1
P07669	TPIS_SCHPO	526.755	2	LGAsVAEGLR	NA		196	205	41.5	7.7e-08	27227.2	Triosephosphate isomerase
P07669	TPIS_SCHPO	538.715	2	MNGsLESMK	0.103	MNGsLESMK	13	21	29.6	0.0024	27227.2	Triosephosphate isomerase
P07799	TOP1_SCHPO	571.585	3	EEEDFNEIAKPsPK	NA		100	113	38.1	5.9e-06	93981.3	DNA topoisomerase 1
P08093	RL2_SCHPO	577.257	2	sGGIFQAHTR	0.428	sGGIFQAHTR	11	20	42.8	1.5e-07	27100.3	60S ribosomal protein L2
P08094	RLA2_SCHPO	762.596	3	EEAKEEEEsDEDMGFGLFD	NA		92	110	23.3	0.001	11158.3	60S acidic ribosomal protein P2-alpha
P08094	RLA2_SCHPO	914.801	2	EEEEsDEDMGFGLFD	NA		96	110	19.3	0.0021	11158.3	60S acidic ribosomal protein P2-alpha
P08094	RLA2_SCHPO	922.808	2	EEEEsDEDmGFGLFD	NA		96	110	15	0.012	11158.3	60S acidic ribosomal protein P2-alpha
P08094	RLA2_SCHPO	767.934	3	EEAKEEEEsDEDmGFGLFD	NA		92	110	16.8	0.013	11158.3	60S acidic ribosomal protein P2-alpha
P08096	TOP2_SCHPO	971.718	3	SIDADFsDYEDEASGDENVLPNTTTK	0.011		1	27	41	2.1e-06	167894	DNA topoisomerase 2
P08096	TOP2_SCHPO	486.555	3	ISKsPGLDSSDSGK	0.01		1307	1320	18.5	0.0093	167894	DNA topoisomerase 2
P08965	MEI2_SCHPO	711.304	3	SSsLNSNSDDIDIFSHASR	0		177	195	40.4	3.7e-06	82677.5	Meiosis protein mei2
P08965	MEI2_SCHPO	486.239	2	KPsVTGFR	0.053	KPsVTGFR	169	176	24.1	5.4e-05	82677.5	Meiosis protein mei2
P09627	PMA1_SCHPO	755.679	3	TVEEDHPIPEDVLsAYKDK	0.015		481	499	36.7	0.00012	99884.8	Plasma membrane ATPase 1
P15398	RPA1_SCHPO	870.697	3	NSNGTPLEDGSDSEDsGLGHDDIAK	0		149	173	34.3	2e-05	189247	DNA-directed RNA polymerase I subunit RPA1
P18253	CYPH_SCHPO	462.554	3	KVEsLGSNSGATR	0.027	KVEsLGSNSGATR	139	151	33.1	0.00042	17402	Peptidyl-prolyl cis-trans isomerase
P19117	IPYR_SCHPO	575.255	2	WFYISGsPL	0.08	WFYISGsPL	281	289	39.5	2.3e-08	32468	Inorganic pyrophosphatase
P21696	GPD1_SCHPO	690.663	3	Acetyl-sGYGQQGVSAANIDSIRPK	0.011		1	20	52.5	2.7e-08	41995.4	Glycerol-3-phosphate dehydrogenase [NAD+] 1
P21696	GPD1_SCHPO	593.281	2	TGKsLETLEK	0.015		307	316	36.9	5.3e-07	41995.4	Glycerol-3-phosphate dehydrogenase [NAD+] 1
P21696	GPD1_SCHPO	690.654	3	Acetyl-SGYGQQGVsAANIDSIRPK	0.047	MSGYGQQGVsAANIDSIRPK	1	20	38.1	1.2e-06	41995.4	Glycerol-3-phosphate dehydrogenase [NAD+] 1
P21696	GPD1_SCHPO	703.311	3	sGyGQQGVSAANIDSIRPK			1	20	26.9	0.00018	41995.4	Glycerol-3-phosphate dehydrogenase [NAD+] 1
P22774	HSP7M_SCHPO	637.614	3	AEsVCTDIESNLDIHK	0.116	AEsVCTDIESNLDIHK	582	597	44.7	2.8e-07	72977.2	Heat shock 70 kDa protein, mitochondrial precursor
P22774	HSP7M_SCHPO	540.236	2	HINMEIsR	NA		338	345	19.3	0.036	72977.2	Heat shock 70 kDa protein, mitochondrial precursor
P22987	KIN1_SCHPO	789.044	3	SStSTLQISAPLETSQSPPTPR	0.006		613	634	33.9	4.1e-05	98750.2	Protein kinase kin1
P22987	KIN1_SCHPO	576.275	4	RKPLPDTEsHSPSPSATSSIK			574	594	34.6	4.3e-05	98750.2	Protein kinase kin1
P22987	KIN1_SCHPO	478.194	2	AAQsEKNK	NA		177	184	18.6	0.018	98750.2	Protein kinase kin1
P24782	DBP2_SCHPO	795.855	2	NFYEsDGPGANLVK	0.032	NFYEsDGPGANLVK	58	71	33	0.00018	61548.6	ATP-dependent RNA helicase dbp2
P24865	CG21_SCHPO	546.585	3	EGsFDAPEGILTHGK	0.373	EGsFDAPEGILTHGK	106	120	34.3	0.00088	47808.9	G2/mitotic-specific cyclin cig1
P25295	TBG_SCHPO	704.307	2	NQmVsVNPsKK			304	314	22.4	0.0011	49966	Tubulin gamma chain
P28189	RS13_SCHPO	684.324	2	ADADsVVEQILK	NA		28	39	45.8	2.4e-07	16953.1	40S ribosomal protein S13
P28189	RS13_SCHPO	607.297	2	GIASsALPYVR	0.017		10	20	18.4	0.0071	16953.1	40S ribosomal protein S13
P28189	RS13_SCHPO	743.284	2	GMsPsQIGVtLR			44	55	19.2	0.029	16953.1	40S ribosomal protein S13
P28745	RCC1_SCHPO	939.411	3	TDDsPVTDAKPDVTSNGEPSTATSESK	0.001		502	528	40.3	6.2e-07	58349.8	Protein pim1
P30261	DPOD3_SCHPO	548.602	3	KAPSTHsPQLSVPSK	0.014		157	171	41	2.9e-06	42350.7	DNA polymerase subunit delta-3
P30821	P25_SCHPO	670.781	2	NVsDDELEIAR	NA		179	189	38.7	2.5e-07	21898.9	P25 protein
P30821	P25_SCHPO	558.743	2	YGtPPAQFR	0.003		83	91	27.8	0.00055	21898.9	P25 protein
P31209	PABP_SCHPO	786.999	3	QADAAVEsDVNTNNEAVESSTK	0.048	QADAAVEsDVNTNNEAVESSTK	9	30	50.4	3.9e-10	71513.3	Polyadenylate-binding protein, cytoplasmic and nuclear
P31209	PABP_SCHPO	829.699	3	KQADAAVEsDVNTNNEAVESSTK	0.045	KQADAAVEsDVNTNNEAVESSTK	8	30	46.1	2.3e-08	71513.3	Polyadenylate-binding protein, cytoplasmic and nuclear
P31209	PABP_SCHPO	781.323	3	qADAAVEsDVNTNNEAVESSTK	0.01		9	30	36.2	4.7e-06	71513.3	Polyadenylate-binding protein, cytoplasmic and nuclear
P31411	VATB_SCHPO	699.615	3	SSAYTESSKDVIDNTPESs	0.005		485	503	31.7	1.3e-05	55841.6	Vacuolar ATP synthase subunit B
P31411	VATB_SCHPO	699.63	3	SSAYTESsKDVIDNTPESS	0.002		485	503	24	0.028	55841.6	Vacuolar ATP synthase subunit B
P31411	VATB_SCHPO	777.337	2	KTtIDFTGHsMR			86	97	26.5	0.028	55841.6	Vacuolar ATP synthase subunit B
P32372	RAD4_SCHPO	713.083	4	SSVTKPETPTsPQEHVSYIDPDAQR	0		582	606	31.2	0.00069	74169.1	S-M checkpoint control protein rad4
P33075	KAD1_SCHPO	656.288	2	sYHLEFNPPK	0.009		140	149	29.3	2.8e-05	24375.3	Adenylate kinase
P33886	WIS1_SCHPO	791.347	2	Acetyl-SsPNNQPLSCSLR	0		1	14	34	0.00014	64762.8	Protein kinase wis1
P33886	WIS1_SCHPO	599.79	2	SKsMPEVVNK	0.056	SKsMPEVVNK	157	166	30.9	0.00022	64762.8	Protein kinase wis1
P35679	RL4A_SCHPO	888.916	2	DGsVSSETIALPFVFK	0		14	29	39.8	9.3e-08	39767.4	60S ribosomal protein L4-A
P36580	ALF_SCHPO	953.922	2	VNIDtDTQFAYVEGVR	0.014		285	300	39.4	3.2e-06	39570.4	Fructose-bisphosphate aldolase
P36580	ALF_SCHPO	773.025	3	YKDYLMtPVGNPEGADKPNK	0.023	YKDYLMtPVGNPEGADKPNK	306	325	38.5	2.2e-05	39570.4	Fructose-bisphosphate aldolase
P36581	CALX_SCHPO	844.378	2	IDVSYAPETEsPTAK	0.003		543	557	46.5	3.6e-07	63466.6	Calnexin homolog precursor
P36582	PCK1_SCHPO	534.558	3	STNsDDHLLSYNR	0.052	STNsDDHLLSYNR	88	100	26.8	0.0064	111785	Protein kinase C-like 1
P36583	PCK2_SCHPO	802.436	2	ELPVLtPVNSILTK	0.055	ELPVLtPVNSILTK	979	992	51.3	5e-10	116006	Protein kinase C-like 2
P36583	PCK2_SCHPO	502.592	3	ADALTKPPsLDAVK	0.126	ADALTKPPsLDAVK	641	654	55.2	1e-08	116006	Protein kinase C-like 2
P36583	PCK2_SCHPO	919.933	2	TQPPYIPSLNsPTDTK	0.001		955	970	48.3	1.7e-08	116006	Protein kinase C-like 2
P36583	PCK2_SCHPO	654.995	3	VDDKADALTKPPsLDAVK	0.093	VDDKADALTKPPsLDAVK	637	654	41.8	2.4e-06	116006	Protein kinase C-like 2
P36583	PCK2_SCHPO	692.282	3	RTQPPYIPsLNSPTDtK			954	970	24.7	0.00071	116006	Protein kinase C-like 2
P36583	PCK2_SCHPO	464.879	3	KEsVHEVYGHK	0.135	KEsVHEVYGHK	397	407	26.9	0.0045	116006	Protein kinase C-like 2
P36592	RAD22_SCHPO	918.097	3	SHTYPVAVPQNTSDSVGNAVTDTsPK	0.007		296	321	53.8	1.6e-10	51961.2	DNA repair and recombination protein rad22
P36594	RPB1_SCHPO	748.854	2	Acetyl-SGIQFsPSSVPLR	0.041	MsGIQFSPSSVPLR	1	14	44.1	7.7e-07	194164	DNA-directed RNA polymerase II subunit RPB1
P36600	KAPR_SCHPO	727.002	3	RQsVSTESmNPSAFALETK	0.046	RQsVSTESmNPSAFALETK	102	120	46.7	7.9e-07	46468.7	cAMP-dependent protein kinase regulatory subunit
P36600	KAPR_SCHPO	721.666	3	RQsVSTESMNPSAFALETK	0.045	RQsVSTESMNPSAFALETK	102	120	34.9	7.2e-05	46468.7	cAMP-dependent protein kinase regulatory subunit
P36600	KAPR_SCHPO	697.785	2	Acetyl-sFEEVYEELK	0.135	MsFEEVYEELK	1	11	27.5	0.00082	46468.7	cAMP-dependent protein kinase regulatory subunit
P36600	KAPR_SCHPO	726.996	3	RQSVSTESmNPsAFALETK	0.054	RQsVSTESmNPSAFALETK	102	120	27.1	0.021	46468.7	cAMP-dependent protein kinase regulatory subunit
P36603	RIR2_SCHPO	614.913	3	EHGEEVEYDsEQGVR	0.043	EHGEEVEYDsEQGVR	14	28	39.5	5.3e-07	45405.8	Ribonucleoside-diphosphate reductase small chain
P36603	RIR2_SCHPO	926.712	3	ETFNFDNVsEEEKQEGGDYYLGK	0.073	ETFNFDNVsEEEKQEGGDYYLGK	37	59	41.5	2.6e-06	45405.8	Ribonucleoside-diphosphate reductase small chain
P36603	RIR2_SCHPO	768.34	2	VSDYQIAGVMSGtK	0.006		363	376	26.8	9.9e-05	45405.8	Ribonucleoside-diphosphate reductase small chain
P36605	HIS8_SCHPO	725.872	2	LALDALsPQSIDK	0.045	LALDALsPQSIDK	261	273	31.8	0.00017	42734.1	Histidinol-phosphate aminotransferase
P36606	NAH_SCHPO	799.375	2	sDSDLELQVIGVDK	0.011		449	462	35	0.00019	52177.2	Na(+)/H(+) antiporter
P36616	DSK1_SCHPO	823.352	4	HNsHPNsPFSSGDNSLILDGVNGSQEPVPK			324	353	27.3	0.0055	61056.4	Protein kinase dsk1
P36619	PMD1_SCHPO	450.87	3	DNEHsLDLSIK	0.13	DNEHsLDLSIK	14	24	28.9	0.00047	149634	Leptomycin B resistance protein pmd1
P36619	PMD1_SCHPO	983.487	2	qIALVSQEPTLYQGtVR	0.01		1196	1212	19.7	0.034	149634	Leptomycin B resistance protein pmd1
P36621	CAP_SCHPO	998.125	3	TQAPSSGDsANGGLPPPPPPPPPSNDFWK	0.002		292	320	55.2	1.7e-09	60243.9	Adenylyl cyclase-associated protein
P36623	PMGY_SCHPO	555.758	2	DPALsETGIK	0.03	DPALsETGIK	31	40	39.2	3.4e-07	23765.3	Phosphoglycerate mutase
P36623	PMGY_SCHPO	837.389	3	TCQIILEEVGEPNLETIKsEK	0.011		70	90	46.3	1.1e-05	23765.3	Phosphoglycerate mutase
P36623	PMGY_SCHPO	735.832	2	sYDIAPPNGESLK	0.005		122	134	34.1	0.00047	23765.3	Phosphoglycerate mutase
P36623	PMGY_SCHPO	681.639	3	sYDIAPPNGESLKDTAER	0.007		122	139	27.9	0.001	23765.3	Phosphoglycerate mutase
P36629	U2AF2_SCHPO	662.796	2	sIEQELEQLR	NA		111	120	46.3	1.8e-06	58933.6	Splicing factor U2AF 59 kDa subunit
P37818	ARGI1_SCHPO	427.212	3	sPHKIPEVHR	NA		1	11	27.9	0.00053	35721.2	Arginase
P38938	CEK1_SCHPO	556.757	2	sLDINDLSR	0.298	sLDINDLSR	460	468	33.9	7.3e-05	149898	Serine/threonine-protein kinase cek1
P38938	CEK1_SCHPO	417.2	2	LPsPSPR	0.098	LPsPSPR	565	571	24	9.3e-05	149898	Serine/threonine-protein kinase cek1
P39964	CEF1_SCHPO	586.27	3	AtPLRtPISGELEGR			363	377	34.1	4e-05	86844.9	Pre-mRNA-splicing factor cef1
P39964	CEF1_SCHPO	621.974	3	KLNLPsPTVSQDELDK	0.003		311	326	28.7	0.0032	86844.9	Pre-mRNA-splicing factor cef1
P40233	CKI1_SCHPO	587.615	3	SPALQNHAStQNVVSK	0.006		331	346	32.1	7e-05	50425.1	Casein kinase I homolog 1
P40233	CKI1_SCHPO	730.323	3	SGLATNQPAPVDVHDSsEER	0.005		390	409	29.6	0.00055	50425.1	Casein kinase I homolog 1
P40235	HHP1_SCHPO	922.116	3	GGDINTTVPVINDPsATGAQYINRPN	0.009		340	365	48.8	2.8e-08	42450.8	Casein kinase I homolog hhp1
P40381	SWI6_SCHPO	756.662	3	ESNESEDIQIAETPSNVtPK	0.013		223	242	49.6	3.8e-06	37292.9	Chromatin-associated protein swi6
P40381	SWI6_SCHPO	969.745	3	SQEEFNENGPPsGQPNGHIESDNESK	0.051	SQEEFNENGPPsGQPNGHIESDNESK	192	217	35.1	1.3e-05	37292.9	Chromatin-associated protein swi6
P40381	SWI6_SCHPO	783.33	3	ESNESEDIQIAEtPSNVtPK			223	242	33	0.00026	37292.9	Chromatin-associated protein swi6
P40381	SWI6_SCHPO	421.977	4	KKPsPEVPKLPDNR	NA		243	256	22.9	0.0006	37292.9	Chromatin-associated protein swi6
P40381	SWI6_SCHPO	859.37	4	SQEEFNENGPPSGQPNGHIESDNESKsPSQK	0.009		192	222	24.5	0.0066	37292.9	Chromatin-associated protein swi6
P40382	CDT1_SCHPO	603.285	2	VSGLtKIsLK			124	133	23.3	0.012	49956.2	Cell division cycle protein cdt1
P40387	TPS1_SCHPO	666.295	3	Acetyl-SDAHDTIKsLTGDASNSR	0.006		1	19	40.2	4.3e-07	58494	Alpha,alpha-trehalose-phosphate synthase [UDP-forming]
P40387	TPS1_SCHPO	710.308	2	TKsAQVLSMNSSS	0.023	TKsAQVLSMNSSS	501	513	39.8	3.6e-06	58494	Alpha,alpha-trehalose-phosphate synthase [UDP-forming]
P40387	TPS1_SCHPO	718.315	2	TKsAQVLSmNSSS	0.035	TKsAQVLSmNSSS	501	513	39.3	1.3e-05	58494	Alpha,alpha-trehalose-phosphate synthase [UDP-forming]
P40387	TPS1_SCHPO	603.745	2	sAQVLSmNSSS	0.15	sAQVLSmNSSS	503	513	30.8	1.8e-05	58494	Alpha,alpha-trehalose-phosphate synthase [UDP-forming]
P40387	TPS1_SCHPO	518.763	2	RLIVVsNR	NA		20	27	22.6	0.00099	58494	Alpha,alpha-trehalose-phosphate synthase [UDP-forming]
P40847	SAP1_SCHPO	613.277	2	NASLsPSSSPAK	0.011		15	26	39.1	1.5e-05	29127.6	Switch-activating protein 1
P40847	SAP1_SCHPO	490.878	3	GGLHSSIsPNLGDH	0.04	GGLHSSIsPNLGDH	241	254	28.9	0.00023	29127.6	Switch-activating protein 1
P40902	ISP7_SCHPO	591.244	3	ESFYFGNDNLsKDR	0.127	ESFYFGNDNLsKDR	183	196	39.3	2.6e-06	43811.3	Sexual differentiation process protein isp7
P40976	LYS2_SCHPO	721.313	3	DDFDsATESEDIVVNGLKK	0.054	DDFDsATESEDIVVNGLKK	796	814	48.5	1.5e-08	156896	L-aminoadipate-semialdehyde dehydrogenase
P40976	LYS2_SCHPO	809.831	2	Acetyl-SQtAPSDTEYNQR	0.004		1	14	40	5.1e-07	156896	L-aminoadipate-semialdehyde dehydrogenase
P40976	LYS2_SCHPO	678.603	3	DDFDsATESEDIVVNGLK	0.007		796	813	30.3	0.0033	156896	L-aminoadipate-semialdehyde dehydrogenase
P40976	LYS2_SCHPO	693.33	2	GAIQDIFAsNAAK	NA		279	291	27.7	0.0042	156896	L-aminoadipate-semialdehyde dehydrogenase
P40976	LYS2_SCHPO	681.808	2	SGEmIsVMDIGK	0.01		957	968	18.4	0.026	156896	L-aminoadipate-semialdehyde dehydrogenase
P40977	PLC1_SCHPO	625.785	2	SNsLSSFLSTK	0.029	SNsLSSFLSTK	81	91	45.6	1.4e-08	102674	1-phosphatidylinositol-4,5-bisphosphate phosphodiesterase 1
P40995	SCD1_SCHPO	722.989	3	THsLDENVNSPTSISSPSSK	0.005		590	609	47.1	4.4e-06	99102.6	Rho guanine nucleotide exchange factor scd1
P41000	CPS3_SCHPO	451.216	4	HRQESEKAtPPSLNK	0.019		503	517	22.6	0.0034	62808.4	Protein cps3
P41004	SMC4_SCHPO	777.849	2	TsSTPSIVDVTPDR	0.008		9	22	35.2	1.2e-05	150654	Structural maintenance of chromosomes protein 4
P41390	PUR1_SCHPO	443.179	3	KHsFAEDEER	NA		504	513	29.5	0.00024	59832.5	Amidophosphoribosyltransferase
P41390	PUR1_SCHPO	784.995	3	EAPEDIsLHNTHSDVTFDFV	0		514	533	19.5	0.012	59832.5	Amidophosphoribosyltransferase
P41391	RNA1_SCHPO	628.973	3	LQYNEIELDAVRtLK			281	295	28.6	0.018	43236.1	Ran GTPase-activating protein 1
P41820	BFR1_SCHPO	668.277	2	DNFGSDIsATTK	0.03	DNFGSDIsATTK	482	493	35.1	8.8e-06	171752	Brefeldin A resistance protein
P41820	BFR1_SCHPO	977.415	3	WTETTPASSEAPEKDNFGsDIsATTK			468	493	30.9	0.00011	171752	Brefeldin A resistance protein
P41820	BFR1_SCHPO	950.757	3	WTETTPASSEAPEKDNFGSDIsATTK	0.005		468	493	22.5	0.029	171752	Brefeldin A resistance protein
P41820	BFR1_SCHPO	969.767	3	DNFGsDISAtTKHELYRQsAVAEK			482	505	24.9	0.037	171752	Brefeldin A resistance protein
P41878	RPN11_SCHPO	796.88	2	VQNEVTLsPEQLR			258	270	51.3	1.8e-08	34572.3	26S proteasome regulatory subunit rpn11
P41887	HSP90_SCHPO	797.367	2	GVVDSEDLPLNLsR	0.163	GVVDSEDLPLNLsR	362	375	39.9	1e-06	80597	Heat shock protein 90 homolog
P41887	HSP90_SCHPO	475.749	2	sPIIAELK	NA		615	622	31	1.7e-05	80597	Heat shock protein 90 homolog
P41887	HSP90_SCHPO	624.602	3	NPsEVTKEEYASFYK	0.056	NPsEVTKEEYASFYK	275	289	29.3	0.00021	80597	Heat shock protein 90 homolog
P41887	HSP90_SCHPO	536.565	3	SLtNDWEDHLAVK	0.017		290	302	21	0.0077	80597	Heat shock protein 90 homolog
P41887	HSP90_SCHPO	536.577	3	sLTNDWEDHLAVK	0.051	sLTNDWEDHLAVK	290	302	19.4	0.017	80597	Heat shock protein 90 homolog
P41892	CDC7_SCHPO	832.017	3	TPIAEsPDHDNWDNEFQGTLK	0.087	TPIAEsPDHDNWDNEFQGTLK	318	338	30.5	7.4e-06	119292	Cell division control protein 7
P42657	RAD25_SCHPO	643.27	3	EEAPAAAAAsENEHPEPK	NA		244	261	61.6	1.3e-12	30369.3	DNA damage checkpoint protein rad25
P42657	RAD25_SCHPO	966.97	4	DNLTLWTSDAEYNQsAKEEAPAAAAASENEHPEPK	0		227	261	36	4.9e-06	30369.3	DNA damage checkpoint protein rad25
P47979	ZFS1_SCHPO	725.647	3	SStGSGSLDFSGLANLHDDSK	0.008		163	183	38.5	7.4e-07	43435.9	Zinc finger protein zfs1
P48008	SPN3_SCHPO	609.649	3	LSTsQLLLDSTVGLDGK	0.001		323	339	36.8	3e-06	46661	Septin homolog spn3
P50514	ARLZ_SCHPO	699.837	2	sCVLEQIQTIK	0.3	sCVLEQIQTIK	446	456	44.9	4.4e-07	51572.2	Probable argininosuccinate lyase
P50514	ARLZ_SCHPO	530.588	3	NTTIDKLsVEDFK	0.016		402	414	34.3	0.0001	51572.2	Probable argininosuccinate lyase
P50522	EF1A1_SCHPO	600.791	2	StTTGHLIYK	0		21	30	28.2	0.00018	49660.9	Elongation factor 1-alpha-A
P50526	SSP1_SCHPO	881.397	2	NYsAGDYVIAPLGGER	0.017		57	72	44.1	7.6e-07	73992.8	Serine/threonine-protein kinase ssp1
P50526	SSP1_SCHPO	581.253	3	EGSSLTHSWtFQPGK	0.001		73	87	21.3	0.018	73992.8	Serine/threonine-protein kinase ssp1
P50527	STE20_SCHPO	669.336	3	SHsPVLLTPQTLSTSETK	0.032	SHsPVLLTPQTLSTSETK	301	318	45.6	3.5e-05	72358.8	Serine/threonine-protein kinase shk1/pak1
P50528	PLO1_SCHPO	507.734	2	SLsANTVSR	0.094	SLsANTVSR	440	448	38.8	4.6e-06	77302.5	Serine/threonine-protein kinase plo1
P50528	PLO1_SCHPO	620.971	3	mAsVAIKEPKTAItPK			1	16	24.2	0.0058	77302.5	Serine/threonine-protein kinase plo1
P50530	SCK1_SCHPO	580.741	2	tPPSSCYIR	0.317	tPPSSCYIR	115	123	29.6	5.8e-05	78595.2	Serine/threonine-protein kinase sck1
P50530	SCK1_SCHPO	841.63	4	SSNSENtNQASPSTIQSHSTQPVLSNDHSTK	0.003		11	41	40.1	0.00014	78595.2	Serine/threonine-protein kinase sck1
P50530	SCK1_SCHPO	446.697	2	GFtFVNK	NA		630	636	17.6	0.019	78595.2	Serine/threonine-protein kinase sck1
P50582	HSK1_SCHPO	825.86	2	sIDEILPNDALQDGA	NA		493	507	37.8	1.5e-05	58408.1	Cell cycle serine/threonine-protein kinase hsk1
P50582	HSK1_SCHPO	594.782	2	Acetyl-AEAHITLsPK	0.001		1	11	30.8	2.9e-05	58408.1	Cell cycle serine/threonine-protein kinase hsk1
P50582	HSK1_SCHPO	645.639	3	KRsIDEILPNDALQDGA	NA		491	507	30.7	0.0099	58408.1	Cell cycle serine/threonine-protein kinase hsk1
P50998	AMPD_SCHPO	882.867	2	YDAmTGTSDPLSAsPR	0.026	YDAmTGTSDPLSAsPR	784	799	64	7.9e-13	97455.8	AMP deaminase
P50998	AMPD_SCHPO	874.866	2	YDAMTGTSDPLSAsPR	0.014		784	799	51.8	2e-09	97455.8	AMP deaminase
P50998	AMPD_SCHPO	518.741	2	DGLPSKsPR	0.001		88	96	32.8	1.8e-07	97455.8	AMP deaminase
P50998	AMPD_SCHPO	534.755	4	RPSVSASTVRNsDDVNHSK	0.036	RPSVSASTVRNsDDVNHSK	97	115	40	1.3e-06	97455.8	AMP deaminase
P50998	AMPD_SCHPO	570.286	2	RPsVSASTVR	0.066	RPsVSASTVR	97	106	33.8	7.5e-06	97455.8	AMP deaminase
P50998	AMPD_SCHPO	882.861	2	YDAmtGTSDPLSASPR	0.021	YDAmTGTSDPLSAsPR	784	799	28.3	6.6e-05	97455.8	AMP deaminase
P50998	AMPD_SCHPO	534.751	4	RPSVSASTVRNSDDVNHsK	0.013		97	115	26.5	0.00083	97455.8	AMP deaminase
P50998	AMPD_SCHPO	412.936	4	HPsNHDLEELIHK			771	783	22	0.0025	97455.8	AMP deaminase
P52808	RL30A_SCHPO	587.756	2	sGKyVLGYK			26	34	18.9	0.008	11591.7	60S ribosomal protein L30-1
P53694	CWL1_SCHPO	818.707	3	Acetyl-sEQHSLNPFESGSVTASDVAAAK	0.022	MSEQHSLNPFEsGSVTASDVAAAK	1	24	50.8	3.8e-07	33659.6	Cell lysis protein cwl1
P53694	CWL1_SCHPO	818.702	3	Acetyl-SEQHSLNPFESGsVTASDVAAAK	0.011		1	24	35.6	1.4e-05	33659.6	Cell lysis protein cwl1
P55306	CATA_SCHPO	486.584	3	NVAGHLSGAIsPVR	0.047	NVAGHLSGAIsPVR	450	463	42.8	1.2e-08	58279.9	Catalase
P55306	CATA_SCHPO	581.63	3	NVAGHLSGAIsPVRER	0		450	465	37.4	7.7e-08	58279.9	Catalase
P55306	CATA_SCHPO	797.384	2	LGANFEQIPVNsPK	NA		352	365	47.4	7.1e-06	58279.9	Catalase
P56286	IF2A_SCHPO	880.385	2	AVsETDELELADLmK	0.007		271	285	47.2	4.1e-09	34526	Eukaryotic translation initiation factor 2 subunit alpha
P56287	EI2BE_SCHPO	751.972	3	RDSANTINsEDFDEGDFNK	0.129	RDSANTINsEDFDEGDFNK	498	516	39.9	3.5e-07	76326.3	Probable translation initiation factor eIF-2B subunit epsilon
P56287	EI2BE_SCHPO	751.981	3	RDsANTINSEDFDEGDFNK	0.018		498	516	38.4	3.7e-07	76326.3	Probable translation initiation factor eIF-2B subunit epsilon
P56287	EI2BE_SCHPO	699.937	3	DSANtINSEDFDEGDFNK	0.024	DSANTINsEDFDEGDFNK	499	516	33.6	1e-05	76326.3	Probable translation initiation factor eIF-2B subunit epsilon
P56287	EI2BE_SCHPO	778.62	3	RDsANTINsEDFDEGDFNK			498	516	31.9	2.7e-05	76326.3	Probable translation initiation factor eIF-2B subunit epsilon
P56329	IF2B_SCHPO	845.863	2	ELEASsTGDATSDLSK	0		133	148	42.8	1.1e-05	35960.8	Probable eukaryotic translation initiation factor 2 subunit beta
P56329	IF2B_SCHPO	524.231	2	sADLSAFEK	0.029	sADLSAFEK	124	132	25	2e-05	35960.8	Probable eukaryotic translation initiation factor 2 subunit beta
P58234	RS19A_SCHPO	681.79	2	IAYSLLEEEsE			134	144	37.3	7.3e-06	16150.5	40S ribosomal protein S19-A
P78772	P78772_SCHPO	900.428	2	VLVPSEPNVSyICSR	0.012		184	198	36.5	3.8e-06	44418.7	Schizosaccharomyces pombe
P78772	P78772_SCHPO	476.247	2	sIPNLSIK	0.401	sIPNLSIK	130	137	26.8	9.8e-05	44418.7	Schizosaccharomyces pombe
P78772	P78772_SCHPO	900.42	2	VLVPSEPNVSYICsR	0.017		184	198	29.2	0.00016	44418.7	Schizosaccharomyces pombe
P78780	DHAS_SCHPO	654.833	2	VGILGATGtVGQR	0.011		6	18	41.4	1.3e-06	38550.5	Probable aspartate-semialdehyde dehydrogenase
P78780	DHAS_SCHPO	469.239	2	IAVLGAsAR	NA		31	39	30.3	9.2e-06	38550.5	Probable aspartate-semialdehyde dehydrogenase
P78780	DHAS_SCHPO	502.72	2	SDsIFDIK	0.038	SDsIFDIK	321	328	36.1	5.7e-05	38550.5	Probable aspartate-semialdehyde dehydrogenase
P78790	ETFA_SCHPO	767.331	2	ALSSsNFKINCGR	0.014		12	24	24	0.012	36393.8	Probable electron transfer flavoprotein subunit alpha, mitochondrial precursor
P78795	EIF3G_SCHPO	672.657	3	SIIGPVDEPPLDAsPVSSR	0.077	SIIGPVDEPPLDAsPVSSR	147	165	43.2	9.1e-08	31494.6	Probable eukaryotic translation initiation factor 3 RNA-binding subunit
P78810	P78810_SCHPO	972.159	4	sQSGTHSSSVSANVLTDSENTPIHADGDNYVDEESR	0		493	528	35	1.5e-05	83635.5	Vacuolar transporter chaperone
P78810	P78810_SCHPO	738.294	3	NDNSTFQTSDsFQELDER	0.001		536	553	27.5	0.0047	83635.5	Vacuolar transporter chaperone
P78810	P78810_SCHPO	458.221	3	GRDsFVAALNSR	0.117	GRDsFVAALNSR	564	575	21.3	0.036	83635.5	Vacuolar transporter chaperone
P78811	UGPA1_SCHPO	710.309	3	SQsAFAFDNTATSIAASTMK	0		15	34	42.4	6e-07	56430	Probable UTP--glucose-1-phosphate uridylyltransferase
P78811	UGPA1_SCHPO	715.642	3	SQsAFAFDNTATSIAASTmK	0.003		15	34	44.6	8.7e-07	56430	Probable UTP--glucose-1-phosphate uridylyltransferase
P78813	YCTB_SCHPO	482.701	2	FPsFGSSR	0.037	FPsFGSSR	187	194	29.2	5.4e-05	51751.8	ENTH domain-containing protein C794.11c
P78813	YCTB_SCHPO	595.257	2	FIGVGsDGDSR	0.062	FIGVGsDGDSR	168	178	35.8	0.00013	51751.8	ENTH domain-containing protein C794.11c
P78813	YCTB_SCHPO	482.701	2	FPSFGsSR	0.024	FPSFGSsR	187	194	26.9	0.00045	51751.8	ENTH domain-containing protein C794.11c
P78813	YCTB_SCHPO	403.185	3	SRFPsFGSSR	0.007		185	194	21.2	0.0065	51751.8	ENTH domain-containing protein C794.11c
P78813	YCTB_SCHPO	909.692	3	VYGDGGGFTDYGNGYHDSSsmSDSR	0.003		201	225	24	0.011	51751.8	ENTH domain-containing protein C794.11c
P78814	SRP2_SCHPO	573.253	3	DREENRsPAYEGSK	0.071	DREENRsPAYEGSK	302	315	30.2	7.5e-05	42566.6	Pre-mRNA-splicing factor srp2
P78814	SRP2_SCHPO	425.697	2	SRsPPAR	0.007		186	192	26.7	0.00012	42566.6	Pre-mRNA-splicing factor srp2
P78820	COAC_SCHPO	809.888	2	LQsVSDLSWYVNK	0.055	LQsVSDLSWYVNK	1177	1189	37.2	5.6e-06	256845	Acetyl-CoA carboxylase
P78917	G6PI_SCHPO	458.203	3	AEGtPDEIVPHK	NA		452	463	35.4	3.3e-06	60884.7	Glucose-6-phosphate isomerase
P78920	YB31_SCHPO	818.037	3	SWNGFAAQtPQNTPSSDVHLSK	0.086	SWNGFAAQtPQNTPSSDVHLSK	11	32	44.8	2.9e-08	43371.3	Putative nucleosome assembly protein C2D10.11C
P78920	YB31_SCHPO	632.295	2	sAHDEVSGLLR	0.239	sAHDEVSGLLR	50	60	26.9	0.00022	43371.3	Putative nucleosome assembly protein C2D10.11C
P78926	MAP1_SCHPO	991.763	3	IFsPSTGIDYETTGQHSVNsPPSTYK			251	276	24.9	0.0007	44423.4	Pheromone receptor transcription activator
P78953	DMF1_SCHPO	700.817	2	GLENSFLSsPNR	0.014		20	31	39.5	1.8e-06	102368	Division mal foutue 1 protein
P78953	DMF1_SCHPO	645.974	3	AHsFDLNRLDLPSQDK	0.327	AHsFDLNRLDLPSQDK	529	544	36	2e-05	102368	Division mal foutue 1 protein
P78958	G3P1_SCHPO	774.897	2	VPtPDVSVVDLTVK	0.138	VPtPDVSVVDLTVK	235	248	50.7	1.9e-08	35870.1	Glyceraldehyde-3-phosphate dehydrogenase 1
P78958	G3P1_SCHPO	712.843	2	GAsANIIPSSTGAAK	0.28	GAsANIIPSSTGAAK	201	215	39.2	6.1e-07	35870.1	Glyceraldehyde-3-phosphate dehydrogenase 1
[truncated: 924 more rows]

## Sheet: S.cerevisiae
## Experimentally determined phosphorylation sites for S. cerevisiae
[truncated: 3,625 more rows]
